# Supplementary material
Source: publisher figshare collection journal article supplement (https://acs.figshare.com/ndownloader/files/4489858)

# Anguinomycins C & D and Derivatives: Total Syntheses, Modelling and Biological Evaluation on CRM-1 mediated Nucleocytoplasmic Transport

*Simone Bonazzi,<sup>†,‡</sup> Oliv Eidam,<sup>§,\*</sup> Stephan Güttinger,<sup>#</sup> Jean-Yves Wach,<sup>†</sup> Ivo Zemp,<sup>#</sup> Ulrike Kutay,<sup>#,\*</sup>  
and Karl Gademann<sup>†,\*</sup>*

Chemical Synthesis Laboratory (SB-ISIC-LSYNC), Ecole Polytechnique Fédérale de Lausanne (EPFL),  
CH-1015 Lausanne, Switzerland; Dept. of Pharmaceutical Chemistry, University of California, San  
Francisco, San Francisco, CA 94158, U.S.A. and Institut für Biochemie, Eidgenössische Technische  
Hochschule Zürich (ETHZ), CH-8093 Zürich, Switzerland.

## SUPPORTING INFORMATION

### Table of Contents

|                                                                                                  |          |
|--------------------------------------------------------------------------------------------------|----------|
| 1. General Methods and Materials                                                                 | page S2  |
| 2. Total Syntheses of Anguinomycins C & D                                                        | page S4  |
| 2.1. Synthesis of the C(1)-C(7) Fragment                                                         | page S4  |
| 2.2. Synthesis of the Alkyl Iodides Fragments                                                    | page S6  |
| 2.3. Synthesis of the Polyketidic Chain                                                          | page S11 |
| 2.4. The Suzuki $sp^3$ - $sp^2$ Cross Coupling and Synthesis Completion                          | page S23 |
| 3. Synthesis of Anguinomycin/Terpene Hybrid                                                      | page S29 |
| 4. X-Ray Crystallography                                                                         | page S32 |
| 5. Biological Evaluation: Cell Culture Techniques, Antibodies and Indirect<br>Immunofluorescence | page S33 |
| 6. Modeling                                                                                      | page S33 |
| 7. Spectra                                                                                       | page S35 |

## 1. General Methods and Materials

Unless otherwise stated, chemicals were purchased from Sigma-Aldrich, ABCR, Acros or Lancaster and used without further purification. Solvents for work-up and chromatography were distilled from technical quality. Solvents used for chemical transformations were either puriss quality or dried by filtration through activated aluminium oxide under argon or nitrogen ( $\text{H}_2\text{O}$  content < 30 ppm, *Karl-Fisher* titration). All non-aqueous reactions were run in oven-dried or flame-dried glassware under a positive pressure of argon or nitrogen. Concentration under reduced pressure was performed by rotary evaporation at 40 °C (unless otherwise specified). Yields refer to purified, dried and spectroscopically pure compound. Analytical thin layer chromatography (TLC) was performed on Merck silica gel 60 F<sub>254</sub> plates (0.25 mm thickness) precoated with fluorescent indicator. The developed plates were examined under UV light and stained with ceric ammonium molybdate followed by heating. Flash chromatography was performed using silica gel 60 (230-240 mesh) from Fluka using a forced flow eluant at 0.3-0.5 bar pressure. Kugelrohr distillations were performed with a Büchi Glass Oven B-585. All  $^1\text{H}$  and  $^{13}\text{C}$  NMR spectra were recorded using either Varian Gemini 300 MHz ( $^1\text{H}$ ) or 75 MHz ( $^{13}\text{C}$ ), Varian Mercury 300 MHz ( $^1\text{H}$ ) or 75 MHz ( $^{13}\text{C}$ ), Bruker DRX 500 MHz ( $^1\text{H}$ ) or 125 MHz ( $^{13}\text{C}$ ), Bruker DPX 400 MHz ( $^1\text{H}$ ) or 100 MHz ( $^{13}\text{C}$ ), Bruker DRX 600 MHz ( $^1\text{H}$ ) or 150 MHz ( $^{13}\text{C}$ ), Bruker Advance 800 MHz ( $^1\text{H}$ ) or 200 MHz ( $^{13}\text{C}$ ) FT spectrometers at room temperature. Chemical shifts  $\delta$  are reported in ppm, multiplicity is reported as follows: s = singlet, d = doublet, t = triplet, q = quartet, quint. = quintet, sext. = sextet, sept. = septet, m = multiplet or unresolved and coupling constant  $J$  in Hz. Analytical gas chromatography (GC) was performed on *Hewlett Packard, HP6810*. *Column*: supelco  $\beta$  dex 120, 30 m x 0.25 mm x 0.25  $\mu\text{m}$ . *Carrier gas*:  $\text{H}_2$ . *Temperature*: 120 °C isothermal. *Flow*: 2 mL/min. *Split ratio*: 40:1. *Detector*: FID. Analytical high-performance liquid chromatography (HPLC) was performed on a *Dionex Chromatography System* (Interface Chromeleon, ASI-100 automated sample injector, UV detector 170U or PDA-100 photodiode array detector, pump P680, TCC thermostated column compartment, degaser, MSQ-ESI mass spectrometric detector). The *flow rate* was 1 mL / min. *Column*: Phenomenex Gemini (5  $\mu\text{m}$ ) (C18 (150 x 4.6 mm)), solvent A:  $\text{H}_2\text{O}$ , solvent B: MeOH). Semi-preparative reversed-phase high-performance liquid chromatography (SP-HPLC) was performed on a *Dionex Chromatography System* (Interface Chromeleon, UV detector 170U or PDA-100 photodiode array detector, pump P680, TCC thermostated column compartment, degaser). The *flow rate* was 5 mL / min. *Column*: Phenomenex Gemini (5  $\mu\text{m}$ ) (C18 110A (150 x 10 mm)), solvent A:  $\text{H}_2\text{O}$ , solvent B: MeOH). All separations were performed at ambient temperature. IR spectra were recorded using a *Varian 2000 FT-IR ATR Spectrometer* or *Varian 800 FT-IR ATR Spectrometer*. The absorptions are reported in  $\text{cm}^{-1}$  and the IR bands were assigned as *s* (strong), *m* (medium) or *w* (weak). Optical rotations  $[\alpha]_{\text{D}}^{\text{T}}$  were measured at the sodium D line using a 1 mL cell with a 1 dm path length on a Jasco

DIP 1000 digital polarimeter, Jasco P-1020 digital polarimeter, Jasco P-2000 digital polarimeter and the concentration  $c$  is given in g/100mL and the used solvent is  $\text{CHCl}_3$ , MeOH or  $\text{H}_2\text{O}$ . Elemental analyses were performed by Mikroanalyse Labor of the Laboratorium für Organische Chemie der ETH Zürich or by Dr. *Euro Solari* in the Laboratory of Supramolecular Chemistry at the EPF Lausanne. All masses spectra were recorded by the Mass spectroscopy Service of Laboratorium für Organische Chemie der ETH Zürich on VG-TRIBRID (EI-MS) spectrometer and spectra measured at 70 eV, on TSQ 7000 ESI or by the Mass spectroscopy Service of EPF Lausanne on MICROMASS (ESI) Q-TOF Ultima API. Fragment ions are given in  $m/z$  with relative intensities (%) in parentheses. X-ray analyses were performed by Dr. *B. Schweizer* at the ETH Zürich or Dr. *R. Scopelliti* at the EPF Lausanne. UV spectra were measured on a *Varian Cary 1 Bio* UV-Visible spectrophotometer in a *Starna* quartz cell (10 mm path length). Lyophilisations were performed using a *Christ Freeze Dryer Alpha 1-2 LD plus*. Melting points (M.p.) were determined using a Büchi B-545 apparatus in open capillaries and are uncorrected.

## 2. Total Syntheses of Anguinomycins C & D

### 2.1. Synthesis of the C(1)-C(7) Fragment

#### Triethyl(((2*R*,6*S*)-6-methoxy-3,6-dihydro-2*H*-pyran-2-yl)ethynyl)silane (**9**)

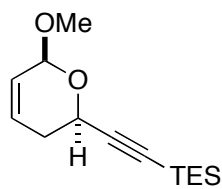

In a 10 mL flask under Ar was added 4 Å molecular sieves (1.26 g), **8** (0.30 g, 0.29 mmol, 0.02 equiv, 2.3 mol%), aldehyde **6** (2.12 g, 12.6 mmol, 1.00 equiv) and 1-methoxy-1,3-butadiene (**7**) (1.28 mL, 12.6 mmol, 1.00 equiv) and the mixture was stirred at RT for 18 hours. The reaction was diluted with pentane, filtered through Celite and concentrated. The residue was purified by chromatography on SiO<sub>2</sub> (pentane/Et<sub>2</sub>O 100:0 → 98:2) to afford **9** (2.73 g, 10.8 mmol, 86%, *e.e.* = 96.2) as a colorless oil. *R<sub>f</sub>* = 0.37 (pentane/Et<sub>2</sub>O 9.5:0.5). Optical rotation [ $\alpha$ ]<sup>27.9</sup><sub>D</sub> (*c* 0.92, CHCl<sub>3</sub>) = +105.8°. <sup>1</sup>H-NMR (300 MHz, CDCl<sub>3</sub>)  $\delta$  5.96-5.90 (m, 1 H), 5.66 (dq, *J*<sub>1</sub> = 10.3 Hz, *J*<sub>2</sub> = 1.9 Hz, 1 H), 5.01-4.98 (m, 1 H), 4.54 (dd, *J*<sub>1</sub> = 7.3 Hz, *J*<sub>2</sub> = 4.9 Hz, 1 H), 3.46 (s, 3 H), 2.42-2.20 (m, 2 H), 0.96 (t, *J* = 7.9 Hz, 9 H), 0.56 (q, *J* = 7.9 Hz, 6 H). <sup>13</sup>C-NMR (75 MHz, CDCl<sub>3</sub>)  $\delta$  127.5, 126.6, 105.5, 97.2, 86.1, 61.5, 55.2, 31.3, 7.5, 4.3. GC ( $\beta$ -dex chiral column) (*T* = 120°C): *t*<sub>R1(minor)</sub> = 42.08 minutes, *t*<sub>R2(major)</sub> = 43.00 minutes and *e.e.* = 96.2. Elemental analysis calcd for C<sub>14</sub>H<sub>24</sub>O<sub>2</sub>Si: [C] 66.61 %, [H] 9.58 %, [O] 12.68 %, [Si] 11.13 %; found [C] 66.61 %, [H] 9.67 %. LRMS-ESI 275.3 (100, [M+Na]<sup>+</sup>). FTIR  $\nu$  2956*m*, 2879*m*, 1982*w*, 1735*w*, 1336*w*, 1036*m*, 763*s*, 740*s* cm<sup>-1</sup>.

#### (2*R*,6*S*)-2-ethynyl-6-methoxy-3,6-dihydro-2*H*-pyran (**10**)

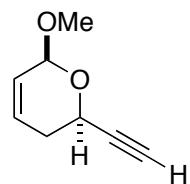

To a solution of **9** (200 mg, 0.79 mmol, 1.00 equiv) in THF (6.30 mL) at 0°C was dropwise added TBAF (1 M in THF) (3.16 mL, 3.16 mmol, 4.00 equiv). The reaction was stirred for 15 min, warmed to RT, stirred for 1 h and quenched with water (20 mL). The mixture was extracted with Et<sub>2</sub>O (3 x 30 mL) and the combined organic layers were washed with brine (1 x 30 mL), dried (MgSO<sub>4</sub>), filtered and carefully concentrated *in vacuo* at 0 °C. The deprotected alkyne **10** was dried over molecular sieves and used directly in the next step without further purification. *R<sub>f</sub>* = 0.27 (pentane/Et<sub>2</sub>O 9:1). <sup>1</sup>H-NMR (300 MHz, CDCl<sub>3</sub>)  $\delta$  6.00 (dtd, *J*<sub>1</sub> = 10.3 Hz, *J*<sub>2</sub> = 4.0 Hz, *J*<sub>3</sub> = 1.5 Hz, 1 H), 5.74 (qd, *J*<sub>1</sub> = 10.3 Hz, *J*<sub>2</sub> = 2.0 Hz, 1 H), 5.01-4.99 (m, 1 H), 4.62 (dt, *J*<sub>1</sub> = 5.7 Hz, *J*<sub>2</sub> = 2.3 Hz, 1 H), 3.50 (s, 3 H), 2.40 (d, *J* = 2.3 Hz, 1 H), 2.37 (ddd, *J*<sub>1</sub> = 7.8 Hz, *J*<sub>2</sub> = 4.1 Hz, *J*<sub>3</sub> = 2.1 Hz, 2 H).

**Triethyl(((2*R*,6*R*)-6-isopropoxy-3,6-dihydro-2*H*-pyran-2-yl)ethynyl)silane (**11**)**

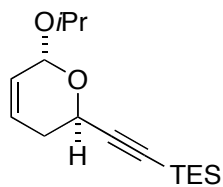

To a solution of *p*TsOH (76.0 mg, 0.40 mmol, 1.00 equiv) in *i*PrOH (0.4 M) (1.00 mL) was added **10** (100 mg, 0.40 mmol, 1.00 equiv) and the solution was stirred at RT for 2 hours. The reaction was quenched with dilute NaHCO<sub>3</sub> and extracted with Et<sub>2</sub>O (3 x 20 mL). The organic layer was dried (MgSO<sub>4</sub>), filtered and concentrated to afford **11** (96.0 mg, 0.34 mmol, 86%) as a colorless oil, which was used without further purification. Optical rotation [ $\alpha$ ]<sup>28.7</sup><sub>D</sub> (*c* 0.795, CHCl<sub>3</sub>) = +33.7°. <sup>1</sup>H-NMR (400 MHz, CDCl<sub>3</sub>)  $\delta$  5.96 (dd, *J*<sub>1</sub> = 10.0 Hz, *J*<sub>2</sub> = 5.4 Hz, 1 H), 5.71 (dd, *J*<sub>1</sub> = 10.1 Hz, *J*<sub>2</sub> = 1.1 Hz, 1 H), 5.14 (br. s, 1 H), 4.71 (dd, *J*<sub>1</sub> = 11.1 Hz, *J*<sub>2</sub> = 3.7 Hz, 1 H), 4.07 (sept., *J* = 6.2 Hz, 1 H), 2.41 (dd, *J*<sub>1</sub> = 17.7 Hz, *J*<sub>2</sub> = 11.2 Hz, 1 H), 2.23 (dd, *J*<sub>1</sub> = 17.7 Hz, *J*<sub>2</sub> = 4.1 Hz, 1 H), 1.29 (d, *J* = 6.2 Hz, 3 H), 1.19 (d, *J* = 6.1 Hz, 3 H), 1.00 (t, *J* = 7.8 Hz, 9 H), 0.63 (q, *J* = 7.8 Hz, 6 H). <sup>13</sup>C-NMR (100 MHz, CDCl<sub>3</sub>)  $\delta$  128.2, 126.3, 106.1, 93.4, 87.0, 70.3, 58.0, 32.1, 24.2, 24.4, 7.8, 4.7. LRMS-ESI 303.2 (100, [M+Na]<sup>+</sup>). FTIR  $\nu$  2957*m*, 2012*m*, 2877*m*, 2186*w*, 1697*w*, 1461*w*, 1380*w*, 1317*w*, 1182*w*, 1098*w*, 1059*w*, 1024*s*, 1000*s*, 799*w*, 726*s* cm<sup>-1</sup>.

**(2*R*,6*R*)-2-ethynyl-6-isopropoxy-3,6-dihydro-2*H*-pyran (**12**)**

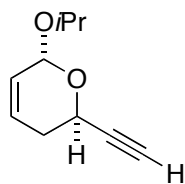

To a cooled (0 °C) solution of **11** (2.97 g, 10.6 mmol, 1.00 equiv) in THF (26.0 mL) was added TBAF (1 M in THF) (10.6 mL, 10.6 mmol, 1.0 equiv). The reaction was stirred for 15 minutes, warmed to RT, stirred for 1 hour and quenched with water (50 mL). The mixture was extracted with Et<sub>2</sub>O (3 x 40 mL) and the combined organic layers were washed with brine (1 x 60 mL), dried (MgSO<sub>4</sub>), filtered and carefully concentrated *in vacuo* at 0 °C. The residue was purified by chromatography on SiO<sub>2</sub> (pentane/Et<sub>2</sub>O 100:0 → 95:5) to give the deprotected alkyne **12** (1.68 g, 10.1 mmol, 95%) as a colorless volatile oil. *R*<sub>f</sub> = 0.45 (cyclohexane/AcOEt 9:1). Optical rotation [ $\alpha$ ]<sup>26.9</sup><sub>D</sub> (*c* 0.58, CHCl<sub>3</sub>) = +80.6°. <sup>1</sup>H-NMR (300 MHz, CDCl<sub>3</sub>)  $\delta$  5.93 (dd, *J*<sub>1</sub> = 10.1 Hz, *J*<sub>2</sub> = 5.7 Hz, 1 H), 5.68 (ddd, *J*<sub>1</sub> = 10.2 Hz, *J*<sub>2</sub> = 2.9 Hz, *J*<sub>3</sub> = 1.3 Hz, 1 H), 5.10 (br. s, 1 H), 4.67 (dddd, *J*<sub>1</sub> = 11.2 Hz, *J*<sub>2</sub> = 3.7 Hz, *J*<sub>3</sub> = 2.2 Hz, *J*<sub>4</sub> = 0.6 Hz, 1 H), 4.03 (sept., *J* = 6.3 Hz, 1 H), 2.44 (d, *J* = 2.2 Hz, 1 H), 2.37 (dddd, *J*<sub>1</sub> = 11.2 Hz, *J*<sub>2</sub> = 4.3 Hz, *J*<sub>3</sub> = 2.1 Hz, *J*<sub>4</sub> = 0.6 Hz, 1 H), 2.19 (dddd, *J*<sub>1</sub> = 17.8 Hz, *J*<sub>2</sub> = 5.2 Hz, *J*<sub>3</sub> = 3.8 Hz, *J*<sub>4</sub> = 1.3 Hz, 1 H), 1.25 (d, *J* = 6.2 Hz, 3 H), 1.16 (d, *J* = 6.2 Hz, 3 H). <sup>13</sup>C-NMR (100 MHz, CDCl<sub>3</sub>)  $\delta$  128.0, 126.4, 93.3, 83.2, 73.1, 70.3, 57.3, 32.4, 24.2, 22.4. FTIR  $\nu$  3306*m*, 2971*m*, 2928*m*, 2053*w*, 1736*w*, 1380*w*, 1184*w*, 1023*m*, 1002*w*, 784*s* cm<sup>-1</sup>.

## 2.2. Synthesis of the Alkyl Iodides Fragments

### ((*S*,3*Z*,5*E*)-4-bromo-6-((2*R*,6*R*)-6-isopropoxy-3,6-dihydro-2*H*-pyran-2-yl)-2-methylhexa-3,5-dienyloxy)triisopropylsilane (**16**)

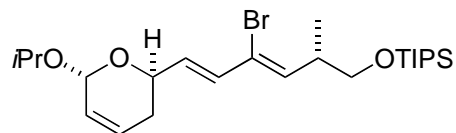

To a cooled (0 °C) solution of alkyne **12** (312 mg, 1.87 mmol, 1.00 equiv) in THF (9.40 mL, 0.2 M vs **12**) was added  $\text{Cp}_2\text{ZrHCl}$  (374 mg, 1.44 mmol, 1.20 equiv). The flask was covered with an aluminium foil, stirred for 5 min at 0 °C and 1 hour at RT. In a separate flask  $\text{ZnCl}_2$  (357 mg, 2.62 mmol, 1.40 equiv) was fused and dissolved in THF (11.2 mL). The solution was added to the solution of alkenylzirconocene at RT and the reaction stirred at RT for 30 minutes. In a separate flask, to a mixture of  $\text{Pd}(\text{PPh}_3)_4$  (109 mg, 0.09 mmol, 0.05 equiv, 5 mol %) in THF (9.40 mL, 0.2 M vs **15**) was added DIBAL-H (10% in hexane) (187  $\mu\text{L}$ , 0.19 mmol, 0.10 equiv, 10 %) and the mixture was stirred 20 minutes at RT and then dibromo olefin **15** (750 mg, 1.87 mmol, 1.00 equiv) was added. The dibromoolefin solution was stirred for 5 minutes at RT and then was added to the organozinc solution. The mixture was stirred 5 minutes at RT and then 13 hours at 40 °C. The reaction was quenched with water (30 mL) and extracted with  $\text{Et}_2\text{O}$  (3 x 40 mL). The combined organic layers were dried ( $\text{MgSO}_4$ ), filtered and concentrated. The residue was purified by chromatography on  $\text{SiO}_2$  ( $\text{CH}_2\text{Cl}_2/\text{cyclohexane}$  7:3) to give the coupled product **16** (756 mg, 1.55 mmol, 83%) as a pale yellow oil.  $R_f$  = 0.39 ( $\text{CH}_2\text{Cl}_2/\text{cyclohexane}$  7:3). Optical rotation  $[\alpha]^{25.0}_{\text{D}}$  ( $c$  0.97,  $\text{CHCl}_3$ ) = +50.0°.  $^1\text{H-NMR}$  (300 MHz,  $\text{CDCl}_3$ )  $\delta$  6.28 (dd,  $J_1 = 14.8$  Hz,  $J_2 = 1.2$  Hz, 1 H), 6.07 (dd,  $J_1 = 14.8$  Hz,  $J_2 = 5.3$  Hz, 1 H), 6.02-5.97 (m, 1 H), 5.88 (d,  $J = 8.9$  Hz, 1 H), 5.72 (ddd,  $J_1 = 10.0$  Hz,  $J_2 = 4.3$  Hz,  $J_3 = 2.6$  Hz, 1 H), 5.12 (d,  $J = 2.8$  Hz, 1 H), 4.58-4.51 (m, 1 H), 4.00 (sept.,  $J = 6.2$  Hz, 1 H), 3.61 (ddd,  $J_1 = 15.8$  Hz,  $J_2 = 9.4$  Hz,  $J_3 = 5.8$  Hz, 2 H), 2.99-2.86 (m, 1 H), 2.10-2.05 (m, 2 H), 1.22 (d,  $J = 6.2$  Hz, 3 H), 1.17 (d,  $J = 6.1$  Hz, 3 H), 1.05 (s, 24 H).  $^{13}\text{C-NMR}$  (75 MHz,  $\text{CDCl}_3$ )  $\delta$  137.3, 133.4, 129.3, 128.2, 126.0, 124.0, 93.1, 69.6, 66.8, 65.7, 39.5, 30.9, 24.0, 22.1, 18.1, 16.2, 12.1. HRMS-EI calcd for  $\text{C}_{44}\text{H}_{43}\text{BrO}_3\text{Si}$ :  $[\text{M}-\text{C}_3\text{H}_7]^+$  443.1612; found 443.1610. FTIR  $\nu$  2942m, 2893m, 2866m, 1463w, 1383w, 1180w, 1102m, 1028s, 1000m, 952w, 883w, 787m, 684m  $\text{cm}^{-1}$ .

**((*S*,3*Z*,5*E*)-6-((2*R*,6*R*)-6-isopropoxy-3,6-dihydro-2*H*-pyran-2-yl)-2,4-dimethylhexa-3,5-dienyloxy)-triisopropylsilane (**17**)**

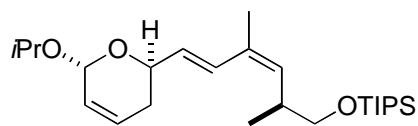

To a solution of **16** (100 mg, 0.23 mmol, 1.00 equiv) in THF (1.00 mL, 0.23 M vs **16**) was added Pd(PPh<sub>3</sub>)<sub>4</sub> (24.0 mg, 0.02 mmol, 0.10 equiv). The solution was stirred for 10 minutes at RT, treated with Me<sub>2</sub>Zn (2.0 M in toluene) (0.21 mL, 0.42 mmol, 2.00 equiv) and the reaction was stirred at 45 °C for 24 hours. An additional portion of Me<sub>2</sub>Zn (0.10 mL, 0.21 mmol, 1.00 equiv) was added and the solution was stirred at 45 °C for 14 hours. The reaction was quenched with dilute NH<sub>4</sub>Cl and extracted with Et<sub>2</sub>O (3 x 15 mL). The combined organic layers were dried (MgSO<sub>4</sub>), filtered and concentrated. The residue was purified by chromatography on SiO<sub>2</sub> (CH<sub>2</sub>Cl<sub>2</sub>/cyclohexane 7:3) to afford product **17** (66.3 mg, 0.16 mmol, 68%, *d.r.* > 97:3) as a colorless oil. *R*<sub>f</sub> = 0.21 (CH<sub>2</sub>Cl<sub>2</sub>/cyclohexane 7:3). Optical rotation [ $\alpha$ ]<sup>28.2</sup><sub>D</sub> (*c* 0.62, CHCl<sub>3</sub>) = +37.9°. <sup>1</sup>H-NMR (300 MHz, CDCl<sub>3</sub>)  $\delta$  6.69 (d, *J* = 15.7 Hz, 1 H), 6.01 (dddd, *J*<sub>1</sub> = 7.7 Hz, *J*<sub>2</sub> = 5.3 Hz, *J*<sub>3</sub> = 1.9 Hz, *J*<sub>4</sub> = 0.9 Hz, 1 H), 5.77-5.67 (m, 2 H), 5.19 (d, *J* = 9.6 Hz, 1 H), 5.13-5.12 (m, 1 H), 4.54-5.47 (m, 1 H), 4.02 (sept., *J* = 6.2 Hz, 1 H), 3.50 (ddd, *J*<sub>1</sub> = 16.9 Hz, *J*<sub>2</sub> = 9.4 Hz, *J*<sub>3</sub> = 6.5 Hz, 2 H), 2.87-2.74 (m, 1 H), 2.20-2.00 (m, 2 H), 1.82 (d, *J* = 1.2 Hz, 3 H), 1.24 (d, *J* = 6.2 Hz, 3 H), 1.18 (d, *J* = 6.1 Hz, 3 H), 1.05-1.04 (m, 24 H). <sup>13</sup>C-NMR (75 MHz, CDCl<sub>3</sub>)  $\delta$  134.2, 131.3, 129.3, 128.4, 128.1, 126.0, 93.0, 69.4, 68.0, 66.9, 34.9, 30.7, 23.8, 21.9, 20.4, 17.9, 17.5, 11.9. Elemental analysis calcd for C<sub>25</sub>H<sub>46</sub>O<sub>3</sub>Si: [C] 71.03, [H] 10.97, [O] 11.35, [Si] 6.64; found [C] 71.11, [H] 10.99. HRMS-EI calcd for C<sub>25</sub>H<sub>46</sub>O<sub>3</sub>Si: [M]<sup>+</sup> 422.3211; found 422.3219. FTIR  $\nu$  2942*m*, 2867*m*, 1462*w*, 1382*w*, 1182*w*, 1122*w*, 1101*w*, 1029*m*, 1000*w*, 780*s*, 683*m* cm<sup>-1</sup>.

**Preparation of Cl<sub>2</sub>Pd(DPEphos)**

A mixture of PdCl<sub>2</sub> (200 mg, 1.12 mmol, 1.00 equiv) and LiCl (94.0 mg, 2.24 mmol, 2.00 equiv) in MeOH (2 mL) was heated to 50 °C for 10 minutes. DPE(phos) (638 mg, 1.18 mmol, 1.05 equiv) was added and the resulting mixture stirred at 50 °C for 8.5 hours, then cooled to RT, filtered, washed with MeOH and dried under high vacuum overnight affording Cl<sub>2</sub>Pd(DPEphos) (755 mg, 1.05 mmol, 94%) as a yellow powder.

**((*S*,3*Z*,5*E*)-4-ethyl-6-((2*R*,6*R*)-6-isopropoxy-3,6-dihydro-2*H*-pyran-2-yl)-2-methylhexa-3,5-dienyloxy)triisopropylsilane (18)**

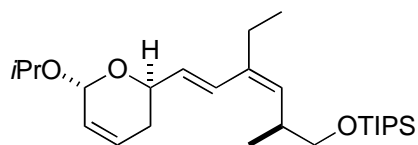

In a 5 mL flask containing  $\text{Cl}_2\text{Pd}(\text{DPEphos})$  (2.20 mg, 0.003 mmol, 0.05 equiv) was added a solution of **16** (30.0 mg, 0.06 mmol, 1.00 equiv) in degassed<sup>1</sup> THF (0.75 mL). To the yellow mixture was slowly added  $\text{Et}_2\text{Zn}$  (1.5 M in toluene) (80  $\mu\text{L}$ , 0.12 mmol, 2.00 equiv) and a pale yellow solution was obtained. The tube was sealed and stirred at 50 °C for 14 hours. The red-brown colored solution was quenched by slow addition of saturated  $\text{NH}_4\text{Cl}$  solution and extracted with  $\text{Et}_2\text{O}$  (3x). The combined organic layers were dried ( $\text{MgSO}_4$ ), filtered and concentrated. The residue was purified by chromatography on  $\text{SiO}_2$  (hexane/acetone 99:1) to give product **18** (22.8 mg, 0.05 mmol, 84%, *d.r.* > 97:3) as a colorless oil.  $R_f$  = 0.65 (hexane/acetone 99.5:0.5). Optical rotation  $[\alpha]^{26.4}_D$  (*c* 0.28,  $\text{CHCl}_3$ ) = +38.5°.  $^1\text{H-NMR}$  (300 MHz,  $\text{CDCl}_3$ )  $\delta$  6.61 (d,  $J$  = 15.9 Hz, 1 H), 6.04-5.99 (m, 1 H), 5.74 (dd,  $J_1$  = 15.8 Hz,  $J_2$  = 6.1 Hz, 1 H), 5.75-5.69 (m, 2 H), 5.19 (d,  $J$  = 9.5 Hz, 1 H), 5.13-5.12 (m, 1 H), 4.54-4.47 (m, 1 H), 4.02 (sept.,  $J$  = 6.2 Hz, 1 H), 3.51 (ddd,  $J_1$  = 16.6 Hz,  $J_2$  = 9.4 Hz,  $J_3$  = 6.5 Hz, 2 H), 2.79 (dq,  $J_1$  = 9.3 Hz,  $J_2$  = 6.6 Hz, 1 H), 2.20 (qd,  $J_1$  = 7.4 Hz,  $J_2$  = 0.9 Hz, 2 H), 2.14-2.00 (m, 2 H), 1.24 (d,  $J$  = 6.3 Hz, 3 H), 1.18 (d,  $J$  = 6.2 Hz, 3 H), 1.05-1.04 (m, 27 H).  $^{13}\text{C-NMR}$  (75 MHz,  $\text{CDCl}_3$ )  $\delta$  136.9, 132.1, 128.6, 128.4, 127.2, 126.0, 93.1, 69.5, 68.2, 67.1, 34.9, 30.9, 26.4, 23.9, 22.2, 18.1, 17.8, 17.7, 17.6, 13.3, 12.1, 12.0. Elemental analysis calcd for  $\text{C}_{25}\text{H}_{46}\text{O}_3\text{Si}$ : [C] 71.50, [H] 11.08, [O] 10.99, [Si] 6.43; found [C] 71.73, [H] 10.93. HRMS-EI calcd for  $\text{C}_{22}\text{H}_{39}\text{O}_3\text{Si}$ :  $[\text{M}-\text{C}_3\text{H}_7]^+$  393.2820; found 393.2830. FTIR  $\nu$  2961 $m$ , 2867 $m$ , 1463 $w$ , 1381 $w$ , 1181 $w$ , 1100 $m$ , 1029 $m$ , 1002 $m$ , 882 $w$ , 785 $s$ , 683 $m$   $\text{cm}^{-1}$ .

**((*S*,3*E*,5*E*)-4-ethyl-6-((2*R*,6*R*)-6-isopropoxy-3,6-dihydro-2*H*-pyran-2-yl)-2-methylhexa-3,5-dienyloxy)triisopropylsilane (19)**

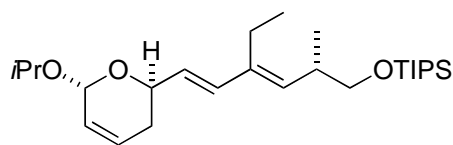

In a 5 mL flask containing  $\text{Pd}(\text{tBu}_3\text{P})_2$  (0.60 mg, 0.001 mmol, 0.10 equiv) was added a solution of **16** (5.00 mg, 0.01 mmol, 1.00 equiv) in degassed THF (0.2 mL). To the mixture was slowly added  $\text{Et}_2\text{Zn}$  (1.5 M in toluene) (13  $\mu\text{L}$ , 0.02 mmol, 2.00 equiv) and a pale yellow solution was obtained. The tube was sealed and stirred at 50 °C for 3.5 hours. The dark brown solution was quenched by addition of saturated  $\text{NH}_4\text{Cl}$  solution and extracted with  $\text{Et}_2\text{O}$  (3x). The combined organic layers were

<sup>1</sup> The solvent was degassed using three freeze/pump/thaw cycles.



dried (MgSO<sub>4</sub>), filtered and concentrated. The residue was purified by chromatography on SiO<sub>2</sub> (hexane/acetone 99:1 → 99:5) to give product **19** (3.25 mg, 0.008 mmol, 75%, *d.r.* > 97:3) as a colorless oil. *R<sub>f</sub>* = 0.65 (hexane/acetone 99.5:0.5). Optical rotation [ $\alpha$ ]<sup>22.4</sup><sub>D</sub> (*c* 0.47, CHCl<sub>3</sub>) = +21.0°. <sup>1</sup>H-NMR (500 MHz, CDCl<sub>3</sub>)  $\delta$  6.17 (d, *J* = 15.9 Hz, 1 H), 6.05-6.02 (m, 1 H), 5.77-5.74 (m, 1 H), 5.67 (dd, *J<sub>1</sub>* = 15.9 Hz, *J<sub>2</sub>* = 6.4 Hz, 1 H), 5.27 (d, *J* = 9.5 Hz, 1 H), 5.15-5.14 (m, 1 H), 4.52-4.48 (m, 1 H), 4.06 (sept., *J* = 6.0 Hz, 1 H), 3.61 (dd, *J<sub>1</sub>* = 9.5 Hz, *J<sub>2</sub>* = 5.6 Hz, 1 H), 3.48 (dd, *J<sub>1</sub>* = 9.5 Hz, *J<sub>2</sub>* = 7.5 Hz, 1 H), 2.73-2.67 (m, 1 H), 2.34-2.25 (m, 2 H), 2.19-2.03 (m, 2 H), 1.28 (d, *J* = 6.4 Hz, 3 H), 1.21 (d, *J* = 6.0 Hz, 3 H), 1.10-1.07 (m, 24 H), 1.05 (d, *J* = 6.8 Hz, 3 H). <sup>13</sup>C-NMR (75 MHz, CDCl<sub>3</sub>)  $\delta$  139.3, 135.6, 134.4, 128.6, 126.4, 126.1, 93.1, 69.4, 68.2, 67.0, 35.9, 31.0, 23.9, 22.1, 20.2, 18.1, 17.5, 14.2, 12.0. HRMS-ESI calcd for C<sub>26</sub>H<sub>48</sub>O<sub>3</sub>SiNa: [M+Na]<sup>+</sup> 459.3271; found 459.3282. FTIR  $\nu$  2963*m*, 2943*m*, 2916*m*, 2866*m*, 1462*w*, 1381*w*, 1180*w*, 1099*w*, 1030*s*, 999*m*, 883*w*, 779*s*, 683*m* cm<sup>-1</sup>.

**(2*R*,6*R*)-2-((*S*,1*E*,3*Z*)-6-iodo-3,5-dimethylhexa-1,3-dienyl)-6-isopropoxy-3,6-dihydro-2*H*-pyran (**20**)**

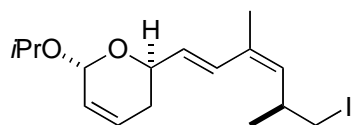

To a cooled (0 °C) solution of **17** (13.8 mg, 0.03 mmol, 1.00 equiv) in THF (160  $\mu$ L) was added TBAF (1 M in THF) (64  $\mu$ L, 0.06 mmol, 2.00 equiv). The reaction was stirred 1 hour at 0 °C and then 1 hour at RT. The

reaction was quenched with water and extracted with Et<sub>2</sub>O (3x). The combined organic layers were dried (MgSO<sub>4</sub>), filtered and concentrated. The residue was purified by chromatography on SiO<sub>2</sub> (hexane/AcOEt 8:2) to give the corresponding alcohol (8.4 mg, 0.03 mmol, 99%) as a colorless oil. *R<sub>f</sub>* = 0.19 (CH<sub>2</sub>Cl<sub>2</sub>/AcOEt 9:1). Optical rotation [ $\alpha$ ]<sup>28.9</sup><sub>D</sub> (*c* 0.49, CHCl<sub>3</sub>) = +29.2°. <sup>1</sup>H-NMR (300 MHz, CDCl<sub>3</sub>)  $\delta$  6.69 (d, *J* = 15.7 Hz, 1 H), 6.01 (ddd, *J<sub>1</sub>* = 10.0 Hz, *J<sub>2</sub>* = 4.7 Hz, *J<sub>3</sub>* = 2.1 Hz, 1 H), 5.77 (dd, *J<sub>1</sub>* = 15.8 Hz, *J<sub>2</sub>* = 6.0 Hz, 1 H), 5.76-5.70 (m, 1 H), 5.17-5.12 (m, 2 H), 4.52 (dt, *J<sub>1</sub>* = 10.3 Hz, *J<sub>2</sub>* = 5.3 Hz, 1 H), 4.01 (sept., *J* = 6.2 Hz, 1 H), 3.54-3.35 (m, 2 H), 2.94-2.79 (m, 1 H), 2.19-2.00 (m, 2 H), 1.86 (s, 3 H), 1.24 (d, *J* = 6.2 Hz, 3 H), 1.18 (d, *J* = 6.2 Hz, 3 H), 0.97 (d, *J* = 6.7 Hz, 3 H). <sup>13</sup>C-NMR (75 MHz, CDCl<sub>3</sub>)  $\delta$  133.6, 130.5, 128.5, 127.9, 127.8, 126.3, 93.3, 69.8, 67.9, 66.9, 34.9, 30.9, 24.0, 22.2, 20.8, 17.3. HRMS-EI calcd for C<sub>16</sub>H<sub>26</sub>O<sub>3</sub>: [M]<sup>+</sup> 266.1877; found 266.1869. FTIR  $\nu$  3416*m*, 2970*m*, 2925*m*, 1455*w*, 1379*w*, 1317*w*, 1126*w*, 1100*m*, 1027*s*, 999*s*, 774*m*, 670*m* cm<sup>-1</sup>.

To a cooled (0 °C) solution of the previously prepared alcohol (4.00 mg, 0.015 mmol, 1.00 equiv) in a mixture toluene/Et<sub>2</sub>O (375  $\mu$ L/100 $\mu$ L) were added imidazole (14.4 mg, 0.21 mmol, 14.1 equiv) and PPh<sub>3</sub> (21.2 mg, 0.08 mmol, 5.4 equiv) and the resulting mixture stirred at 0 °C for 15 minutes. A solution of I<sub>2</sub> (19.8 mg, 0.078 mmol, 5.2 equiv) in Et<sub>2</sub>O (375  $\mu$ L) was added dropwise and the resulting mixture covered by an aluminium foil, stirred for 10 minutes at 0 °C and then 2 hours at RT. The

mixture was directly filtered over cotton and concentrated. The residue was diluted in pentane, the precipitate filtered and the filtrate concentrated. Purification by chromatography on SiO<sub>2</sub> (hexane/EtOAc 100:0 → 99:1) afforded alkyl iodide **30** (4.2 mg, 0.011 mmol, 75%) as a colorless oil.  $R_f = 0.48$  (hexane/AcOEt 8.5:1.5). Optical rotation  $[\alpha]^{25.0}_D$  ( $c$  0.11, CHCl<sub>3</sub>) = +6.4°. <sup>1</sup>H-NMR (400 MHz, CDCl<sub>3</sub>)  $\delta$  6.64 (d,  $J = 15.7$  Hz, 1 H), 6.05-6.02 (m, 1 H), 5.80 (dd,  $J_1 = 15.7$  Hz,  $J_2 = 5.8$  Hz, 1 H), 5.77-5.75 (m, 1 H), 5.17 (d,  $J = 9.5$  Hz, 1 H), 5.16 (s, 1 H), 4.58-4.53 (m, 1 H), 4.05 (sept.,  $J = 6.2$  Hz, 1 H), 3.17 (dd,  $J_1 = 9.4$  Hz,  $J_2 = 5.7$  Hz, 1 H), 3.09 (dd,  $J_1 = 9.4$  Hz,  $J_2 = 7.3$  Hz, 1 H), 2.92-2.82 (m, 1 H), 2.20-2.03 (m, 2 H), 1.87 (s, 3 H), 1.29 (d,  $J = 6.1$  Hz, 3 H), 1.22 (d,  $J = 6.1$  Hz, 3 H), 1.13 (d,  $J = 6.6$  Hz, 3 H). <sup>13</sup>C-NMR (100 MHz, CDCl<sub>3</sub>)  $\delta$  134.3, 132.7, 131.1, 128.6, 128.0, 126.7, 93.7, 70.1, 67.2, 34.4, 31.2, 24.3, 22.5, 21.9, 20.7, 15.2. HRMS-EI calcd for C<sub>16</sub>H<sub>25</sub>O<sub>2</sub>NaI:  $[M + Na]^+$  399.0797; found 399.0801. FTIR  $\nu$  3322w, 2968w, 2924w, 1659w, 1377w, 1454w, 1377w, 1180w, 1099w, 1028m, 1000m, 785s cm<sup>-1</sup>.

**(2*R*,6*R*)-2-(((*S*,1*E*,3*Z*)-3-ethyl-6-iodo-5-methylhexa-1,3-dienyl)-6-isopropoxy-3,6-dihydro-2*H*-pyran (21)**

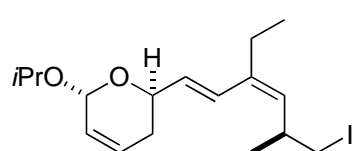

To a cooled (0 °C) solution of **18** (200 mg, 0.46 mmol, 1.00 equiv) in THF (3.0 mL) was added TBAF (1 M in THF) (970  $\mu$ L, 0.97 mmol, 2.10 equiv).

The reaction was stirred 5 minutes at 0 °C and then 1.5 hour at RT. The reaction was cooled to 0°C, quenched with water and extracted with Et<sub>2</sub>O (3x). The combined organic layers were dried (MgSO<sub>4</sub>), filtered and concentrated. The residue was purified by chromatography on SiO<sub>2</sub> (hexane/AcOEt 8:2 → 7:3) to give the corresponding alcohol (126 mg, 0.45 mmol, 98%) as a colorless oil.  $R_f = 0.25$  (hexane/AcOEt 8:2). Optical rotation  $[\alpha]^{22.7}_D$  ( $c$  0.19, CHCl<sub>3</sub>) = +21.2°. <sup>1</sup>H-NMR (300 MHz, CDCl<sub>3</sub>)  $\delta$  6.62 (d,  $J = 16.0$  Hz, 1 H), 6.03-5.99 (m, 1 H), 5.80 (dd,  $J_1 = 16.0$  Hz,  $J_2 = 6.1$  Hz, 1 H), 5.75-5.71 (m, 1 H), 5.14-5.12 (m, 2 H), 4.52 (m, 1 H), 4.02 (sept.,  $J = 6.1$  Hz, 1 H), 3.53-3.47 (m, 1 H), 3.41-3.36 (m, 1 H), 2.91-2.80 (m, 1 H), 2.25 (q,  $J = 7.4$  Hz, 2 H), 2.17-2.02 (m, 2 H), 1.35 (dd,  $J_1 = 8.0$ ,  $J_2 = 4.2$  Hz, 1 H), 1.25 (d,  $J = 6.1$  Hz, 3 H), 1.18 (d,  $J = 6.1$  Hz, 3 H), 1.08 (t,  $J = 7.4$  Hz, 3 H), 0.98 (d,  $J = 6.4$  Hz, 3 H). <sup>13</sup>C-NMR (75 MHz, CDCl<sub>3</sub>)  $\delta$  139.7, 131.7, 130.2, 128.9, 127.2, 126.6, 93.7, 70.1, 68.4, 67.4, 35.1, 31.2, 26.9, 24.3, 22.6, 17.7, 13.8. HRMS-ESI calcd for C<sub>17</sub>H<sub>27</sub>O<sub>3</sub>Na:  $[M + Na]^+$  303.1931; found 303.1934. FTIR  $\nu$  3426m, 2967m, 2924m, 2874m, 1462w, 1381w, 1315w, 1261w, 1180w, 1099m, 1030s, 1003m, 799w, 718w cm<sup>-1</sup>.

To a cooled (0 °C) solution of the previously prepared alcohol (125 mg, 0.45 mmol, 1.00 equiv) in a mixture toluene/Et<sub>2</sub>O (2:1) (20 mL), imidazole (425 mg, 6.24 mmol, 14. equiv) and PPh<sub>3</sub> (643 mg, 2.45 mmol, 5.5 equiv) were added and the resulting mixture was stirred at 0 °C for 10 minutes. A solution of I<sub>2</sub> (599 mg, 2.36 mmol, 5.3 equiv) in Et<sub>2</sub>O (6 mL) was added dropwise over a period of 15 minutes. The resulting mixture was covered by an aluminium foil and stirred 0 °C for 45 minutes. The mixture was filtered and the precipitate washed with Et<sub>2</sub>O. The precipitate was triturated in EtOAc and filtered. The combined organic phase was concentrated and the residue diluted in a mixture hexane/EtOAc 7:3 and filtered over a pad of silica and concentrated. Purification by chromatography on SiO<sub>2</sub> (hexane/EtOAc 99.5:0.5 → 98:2) afforded alkyl iodide **21** (156 mg, 0.40 mmol, 89%) as a colorless oil. *R*<sub>f</sub> = 0.52 (hexane/AcOEt 9.5:0.5). Optical rotation [ $\alpha$ ]<sup>22.7</sup><sub>D</sub> (*c* 1.00, CHCl<sub>3</sub>) = −2.8°. <sup>1</sup>H-NMR (400 MHz, CDCl<sub>3</sub>)  $\delta$  6.53 (d, *J* = 16.0 Hz, 1 H), 6.03-6.00 (m, 1 H), 5.80 (dd, *J*<sub>1</sub> = 15.7 Hz, *J*<sub>2</sub> = 6.1 Hz, 1 H), 5.75-5.72 (m, 1 H), 5.14-5.12 (m, 2 H), 4.54-4.49 (m, 1 H), 4.03 (sept., *J* = 6.4 Hz, 1 H), 3.14 (dd, *J*<sub>1</sub> = 9.3 Hz, *J*<sub>2</sub> = 5.4 Hz, 1 H), 3.07 (dd, *J*<sub>1</sub> = 9.3 Hz, *J*<sub>2</sub> = 7.4 Hz, 1 H), 2.88-2.79 (m, 1 H), 2.22 (q, *J* = 7.4 Hz, 2 H), 2.14-2.02 (m, 2 H), 1.27 (d, *J* = 6.4 Hz, 3 H), 1.19 (d, *J* = 6.1 Hz, 3 H), 1.11 (d, *J* = 6.7 Hz, 3 H), 1.07 (t, *J* = 7.4 Hz, 3 H). <sup>13</sup>C-NMR (100 MHz, CDCl<sub>3</sub>)  $\delta$  138.5, 132.5, 130.3, 128.9, 127.2, 126.6, 93.7, 70.2, 67.4, 34.4, 31.2, 26.7, 24.4, 22.6, 22.0, 15.7, 13.7. HRMS-ESI calcd for C<sub>17</sub>H<sub>27</sub>O<sub>2</sub>NaI: [M + Na]<sup>+</sup> 413.0953; found 413.0941. FTIR  $\nu$  2967*m*, 2928*m*, 2878*w*, 1454*w*, 1377*w*, 1315*w*, 1180*w*, 1126*w*, 1099*w*, 1030*s*, 1003*m*, 964*w*, 718*w* cm<sup>−1</sup>.

### 2.3. Synthesis of the Polyketidic Chain

#### (*R*)-3-((*S,E*)-2,4-dimethylhex-4-enoyl)-4-isopropyl-5,5-diphenyloxazolidin-2-one (**24**)

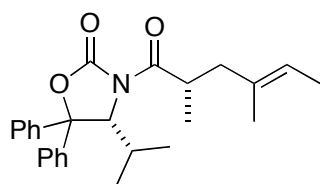

In a 1L double-necked round bottom flask, a solution of DIPA (11.7 mL, 89.0 mmol, 1.25 equiv) in THF (200 mL) was cooled to 0 °C and *n*BuLi (1.6 M in hexane) (55.7 mL, 89.0 mmol, 1.25 equiv) was slowly added. The resulting solution was stirred at 0 °C for 30 minutes and then cooled to −78 °C. A precooled solution of **22** (24.0 g, 71.0 mmol, 1.00 equiv) in THF (130 mL) was slowly added and the resulting mixture stirred at −78 °C for 30 minutes followed by the slow addition of a precooled solution of (*E*)-1-bromo-2-methylbut-2-ene (**23**) (22.2 g, 149 mmol, 2.10 equiv) in THF (60 mL). The reaction was stirred at −78 °C for 5 minutes and then allowed to warm up to −10 °C while stirring was continued for 26 hours. The reaction was quenched by addition of saturated NH<sub>4</sub>Cl solution and extracted with Et<sub>2</sub>O (3x). The combined organic layers were dried (MgSO<sub>4</sub>) and concentrated. The crude

pale yellow solid was washed with a small amount of ice-cold pentane to afford product **24** (26.4 g, 65.0 mmol, 92%, *d.r.* > 97:3) as a white crystalline solid.  $R_f$  = 0.50 (cyclohexane/EtOAc 9:1). M.p. = 101-103 °C. Optical rotation  $[\alpha]^{28.3}_D$  (*c* 1.00, CHCl<sub>3</sub>) = +177.0°. <sup>1</sup>H-NMR (300 MHz, CDCl<sub>3</sub>) δ 7.48-7.44 (m, 2 H), 7.42-7.26 (m, 8 H), 5.40 (d, *J* = 3.2 Hz, 1H), 5.30-5.22 (m, 1 H), 3.90 (sext., *J* = 7.2 Hz, 1 H), 2.54 (dd, *J*<sub>1</sub> = 13.4 Hz, *J*<sub>2</sub> = 7.2 Hz, 1 H), 2.01-1.89 (m, 2 H), 1.65-1.64 (m, 3 H), 1.55 (dd, *J*<sub>1</sub> = 6.7 Hz, *J*<sub>2</sub> = 1.0 Hz, 3 H), 0.85 (d, *J* = 7.0 Hz, 3 H), 0.79 (d, *J* = 6.8 Hz, 3 H), 0.74 (d, *J* = 6.7 Hz, 3 H). <sup>13</sup>C-NMR (75 MHz, CDCl<sub>3</sub>) δ 176.7, 152.7, 142.2, 138.0, 132.8, 128.6, 128.4, 128.2, 127.7, 125.7, 125.5, 120.9, 89.0, 64.2, 43.6, 35.3, 29.6, 21.5, 16.1, 16.0, 15.3, 13.2. Elemental analysis calcd for C<sub>26</sub>H<sub>31</sub>NO<sub>3</sub>: [C] 77.01 %, [H] 7.70 %, [N] 3.45 %; found [C] 76.79 %, [H] 7.67 %, [N] 3.52 %. HRMS-EI calcd for C<sub>26</sub>H<sub>31</sub>NO<sub>3</sub>: [M]<sup>+</sup> 405.2299; found 405.2301. FTIR ν 2968w, 2934w, 2888w, 1776s, 1698s, 1495w, 1450m, 1385m, 1371m, 1348m, 1312m, 1246m, 1207s, 1174s, 1149m, 1123m, 1094m, 1056m, 1035w, 986s, 949m, 764s, 750s, 703s, 694s, 668s, 636m cm<sup>-1</sup>.

**(*S,E*)-2,4-dimethylhex-4-enal (**25**)**

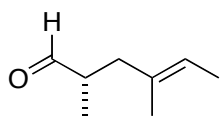

To a cooled (0 °C) suspension of LiAlH<sub>4</sub> (1.56 g, 41.2 mmol, 8.00 equiv) in Et<sub>2</sub>O (20 mL) was slowly added a solution of **24** (2.09 g, 5.15 mmol, 1.00 equiv) in Et<sub>2</sub>O (48 mL). The resulting solution was stirred for 30 minutes at 0 °C and then 3 hours at RT. The reaction was cooled to 0 °C and quenched by addition of H<sub>2</sub>O (3 mL), NaOH (15 %) (3 mL) and H<sub>2</sub>O (9 mL). The white granular aluminium salts were filtered over Celite and washed with Et<sub>2</sub>O (3x). The combined organic layers were dried (MgSO<sub>4</sub>) and concentrated to afford the corresponding alcohol (0.66 g, 5.15 mmol, 100%) as a colorless oil.  $R_f$  = 0.19 (cyclohexane/EtOAc 8.5:1.5). Optical rotation  $[\alpha]^{24.6}_D$  (*c* 0.55, CHCl<sub>3</sub>) = -4.7°. <sup>1</sup>H-NMR (300 MHz, CDCl<sub>3</sub>) δ 5.24 (qd, *J*<sub>1</sub> = 6.6 Hz, *J*<sub>2</sub> = 1.2 Hz, 1 H), 3.52-3.39 (m, 2 H), 2.11-2.02 (m, 1 H), 1.89-1.77 (m, 2 H), 1.61-1.57 (m, 6 H), 0.86 (d, *J* = 6.5 Hz, 3 H). <sup>13</sup>C-NMR (75 MHz, CDCl<sub>3</sub>) δ 134.3, 120.1, 68.5, 44.3, 33.7, 16.8, 15.7, 13.5. FTIR ν 3320m, 2917m, 1456w, 1037m, 786s, 668w cm<sup>-1</sup>.

To a cooled (-78 °C) solution of oxalyl chloride (867 μL, 9.94 mmol, 2.00 equiv) in CH<sub>2</sub>Cl<sub>2</sub> (10.5 mL) was added dropwise a solution of DMSO (1.41 mL, 20.0 mmol, 4.00 equiv) in CH<sub>2</sub>Cl<sub>2</sub> (10.5 mL). After 5 minutes a solution of the previously prepared alcohol (637 mg, 4.97 mmol, 1.00 equiv) in CH<sub>2</sub>Cl<sub>2</sub> (10.0 mL) was slowly added. Stirring at -78 °C was continued for 15 minutes, followed by addition of a solution of NEt<sub>3</sub> (4.16 mL, 29.8 mmol, 6 equiv) in CH<sub>2</sub>Cl<sub>2</sub> (10.5 mL). The resulting solution was stirred at -78 °C for 20 minutes and then at 0 °C for 30 minutes. The reaction was quenched by addition of buffer phosphate (pH = 7) (32 mL) and the solution stirred at RT for 15 minutes. The organic phase was

separated and the aqueous phase extracted with  $\text{CH}_2\text{Cl}_2$  (3x). The combined organic layers were washed with water (2x) and brine (1x), dried ( $\text{MgSO}_4$ ) and concentrated. Purification by chromatography on  $\text{SiO}_2$  ( $\text{CH}_2\text{Cl}_2/\text{cyclohexane}$  7:3) afforded aldehyde **25** (619 mg, 4.91 mmol, 99%) as a colorless oil.  $R_f$  = 0.42 (pentane/ $\text{Et}_2\text{O}$  9.5:0.5). Optical rotation  $[\alpha]^{22.0}_D$  ( $c$  0.93,  $\text{CHCl}_3$ ) = +9.9°.  $^1\text{H}$ -NMR (300 MHz,  $\text{CDCl}_3$ )  $\delta$  9.61 (d,  $J$  = 2.1 Hz, 1 H), 5.29-5.23 (m, 1 H), 2.57-2.45 (m, 1 H), 2.41 (dd,  $J_1$  = 13.4 Hz,  $J_2$  = 6.6, Hz, 1 H), 1.98 (dd,  $J_1$  = 13.7 Hz,  $J_2$  = 7.7 Hz, 1 H), 1.59 (s, 3 H), 1.58 (d,  $J$  = 7.0 Hz, 3 H), 1.03 (d,  $J$  = 6.8 Hz, 3 H).  $^{13}\text{C}$ -NMR (75 MHz,  $\text{CDCl}_3$ )  $\delta$  205.5, 132.2, 121.6, 44.5, 40.9, 15.7, 13.5, 13.3. FTIR  $\nu$  2922m, 1708w, 1442w, 1378w, 777s  $\text{cm}^{-1}$ .

**(S)-3-((2S,3R,4S,E)-3-hydroxy-2,4,6-trimethyloct-6-enoyl)-4-isopropyl-5,5-diphenyloxazolidin-2-one (26)**

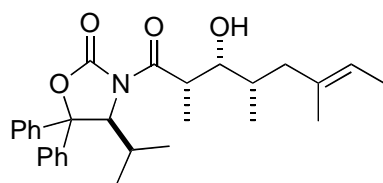

To a cooled ( $-5^\circ\text{C}$ ) solution of *ent*-**22** (84.4 mg, 0.25 mmol, 1.00 equiv) in  $\text{CH}_2\text{Cl}_2$  (0.30 mL),  $\text{Bu}_2\text{BOTf}$  (1 M in  $\text{CH}_2\text{Cl}_2$ ) (263  $\mu\text{L}$ , 0.26 mmol, 1.05 equiv) was slowly added and the solution turns from colorless to pale green.  $\text{NEt}_3$  (42  $\mu\text{L}$ , 0.30 mmol, 1.20 equiv) was slowly added over a period of 5 minutes and the solution turned to pale yellow. Stirring at  $0^\circ\text{C}$  was continued for 1 hour. The resulting solution was cooled to  $-78^\circ\text{C}$  and aldehyde **25** (63 mg, 0.50 mmol, 2.00 equiv) in  $\text{CH}_2\text{Cl}_2$  (0.20 mL) was slowly added and the mixture stirred for 1 hour at  $-78^\circ\text{C}$  and finally for 1 hour at  $0^\circ\text{C}$ . The reaction was quenched at  $0^\circ\text{C}$  by sequentially addition of buffer phosphate (pH = 7) (0.3 mL), MeOH (0.9 mL) and MeOH/ $\text{H}_2\text{O}_2$  (2:1) (0.9 mL). The mixture was stirred for 1.5 hours at RT before dilution with  $\text{Et}_2\text{O}$ , washed with HCl (0.5 M) (1x), saturated  $\text{NaHCO}_3$  solution (1x) and brine (1x), dried ( $\text{MgSO}_4$ ) and concentrated. The residue was purified by chromatography on  $\text{SiO}_2$  ( $\text{Et}_2\text{O}$ /pentane 8:2) to afford product **26** (89.2 mg, 0.19 mmol, 77%, *d.r.* > 87:13) as a white crystalline solid.  $R_f$  = 0.33 (pentane/ $\text{Et}_2\text{O}$  7:3). M.p. =  $98-99^\circ\text{C}$ . Optical rotation  $[\alpha]^{24.5}_D$  ( $c$  1.00,  $\text{CHCl}_3$ ) =  $-103.6^\circ$ .  $^1\text{H}$ -NMR (300 MHz,  $\text{CDCl}_3$ )  $\delta$  7.53-7.50 (m, 2 H), 7.43-7.28 (m, 8 H), 5.37 (d,  $J$  = 3.6 Hz, 1 H), 5.18-5.11 (m, 1 H), 3.83-3.74 (m, 1 H), 3.43 (td,  $J_1$  = 6.7 Hz,  $J_2$  = 4.9 Hz, 1 H), 2.06-1.90 (m, 2 H), 1.86 (d,  $J$  = 5.1 Hz, 1 H), 1.66-1.57 (m, 2 H), 1.56 (d,  $J$  = 6.6 Hz, 3 H), 1.51 (s, 3 H), 1.31 (d,  $J$  = 6.9 Hz, 3 H), 0.86 (d,  $J$  = 6.9 Hz, 3 H), 0.78 (d,  $J$  = 6.8 Hz, 3 H), 0.41 (d,  $J$  = 6.7 Hz, 3 H).  $^{13}\text{C}$ -NMR (75 MHz,  $\text{CDCl}_3$ )  $\delta$  176.1, 152.4, 142.2, 137.6, 133.6, 128.7, 128.4, 128.3, 127.8, 125.6, 125.2, 120.3, 89.4, 64.6, 44.0, 40.4, 33.0, 29.8, 21.7, 16.5, 15.4, 13.9, 13.5, 13.4. Elemental analysis calcd for  $\text{C}_{29}\text{H}_{37}\text{NO}_4$ : [C] 74.57 %, [H] 8.19 %, [N] 2.91 %; found [C] 74.68 %, [H] 8.03 %, [N] 2.91 %. HRMS-EI calcd for  $\text{C}_{29}\text{H}_{35}\text{NO}_3$ :  $[\text{M}-\text{H}_2\text{O}]^+$

445.2611; found 445.2611. FTIR  $\nu$  3475 $m$ , 2965 $m$ , 2931 $m$ , 1781 $s$ , 1697 $m$ , 1494 $w$ , 1450 $m$ , 1374 $m$ , 1316 $w$ , 1254 $w$ , 1208 $s$ , 1176 $s$ , 1050 $m$ , 987 $m$ , 954 $w$ , 760 $m$ , 704 $m$ , 668 $m$   $\text{cm}^{-1}$ .

**(2*S*,3*R*,4*S*,*E*)-3-hydroxy-*N*-methoxy-*N*,2,4,6-tetramethyloct-6-enamide (27)**

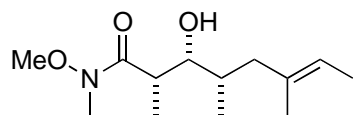

To a cooled (0 °C) suspension of MeONHMe•HCl (503 mg, 5.16 mmol, 6.00 equiv) in CH<sub>2</sub>Cl<sub>2</sub> (5.2 mL) was added AlMe<sub>3</sub> (2 M in toluene) (2.10 mL, 5.16 mmol, 6.00 equiv). The resulting solution was stirred at 0 °C for 5 minutes, then at RT for 1 hour. The clear solution was cooled to 0 °C and **26** (400 mg, 0.86 mmol, 1.00 equiv) in CH<sub>2</sub>Cl<sub>2</sub> (1.0 mL) was added by canula. Stirring at 0 °C was continued for 5 minutes, then at RT for 15 hours. The reaction mixture was slowly transferred in a diluted HCl solution (0.5 M) (27.0 mL), diluted with more CH<sub>2</sub>Cl<sub>2</sub> and stirred at RT for 1 hour. The aqueous layer was separated and extracted with CH<sub>2</sub>Cl<sub>2</sub> (3x). The combined organic phases were washed with saturated NaHCO<sub>3</sub> (1x) and brine (1x), dried (MgSO<sub>4</sub>) and concentrated. The residue was diluted in ice-cold Et<sub>2</sub>O, the precipitated cleaved auxiliary was filtered and the filtrate was concentrated. Purification by chromatography on SiO<sub>2</sub> (pentane/Et<sub>2</sub>O 4:6) afforded product **27** (179 mg, 0.74 mmol, 86%) as white crystalline solid. An analytical sample was recrystallized (hexane) for X-ray analysis (crystallographic data are given at the end of the experimental part).  $R_f$  = 0.21 (pentane/Et<sub>2</sub>O 4:6). M.p. = 54-55 °C. Optical rotation  $[\alpha]^{22.4}_D$  (c 0.50, CHCl<sub>3</sub>) = +6.7°. <sup>1</sup>H-NMR (300 MHz, CDCl<sub>3</sub>)  $\delta$  5.23 (q,  $J$  = 6.2 Hz, 1 H), 3.70 (s, 3 H), 3.57-3.53 (m, 1 H), 3.33 (d,  $J$  = 2.5 Hz, 1 H), 3.19 (s, 3 H), 3.12 (br. s, 1 H), 2.08 (d,  $J$  = 8.5 Hz, 1 H), 1.82-1.68 (m, 2 H), 1.60-1.58 (m, 6 H), 1.19 (d,  $J$  = 7.0 Hz, 3 H), 0.90 (d,  $J$  = 6.3 Hz, 3 H). <sup>13</sup>C-NMR (75 MHz, CDCl<sub>3</sub>)  $\delta$  178.0, 133.8, 120.4, 75.3, 61.4, 43.7, 36.3, 33.0, 31.9, 15.2, 14.7, 13.2, 11.2. Elemental analysis calcd for C<sub>13</sub>H<sub>25</sub>NO<sub>3</sub>: [C] 64.17 %, [H] 10.35 %, [N] 5.76 %, [O] 19.72 %; found: [C] 64.23 %, [H] 10.46 %, [N] 5.67 %. LRMS-ESI 266.2 (100, [M + Na]<sup>+</sup>). FTIR  $\nu$  3452 $m$ , 2965 $s$ , 2934 $s$ , 1640 $s$ , 1513 $w$ , 1457 $s$ , 1382 $s$ , 1300 $m$ , 1249 $m$ , 1176 $m$ , 1122 $m$ , 993 $s$ , 826 $w$   $\text{cm}^{-1}$ .

**(2*S*,3*R*,4*S*,*E*)-3-(*tert*-butyldimethylsilyloxy)-2,4,6-trimethyloct-6-enal (**28**)**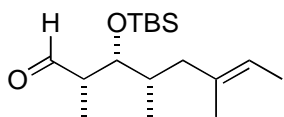

To a cooled ( $-20\text{ }^{\circ}\text{C}$ ) solution of **27** (467 mg, 1.92 mmol, 1.00 equiv) in  $\text{CH}_2\text{Cl}_2$  (4.0 mL) were sequentially added 2,6-lutidine (257  $\mu\text{L}$ , 2.21 mmol, 1.15 equiv) and TBSOTf (354  $\mu\text{L}$ , 2.02 mmol, 1.05 equiv). The resulting solution was stirred for 15 min at  $-20\text{ }^{\circ}\text{C}$ ; then at  $0\text{ }^{\circ}\text{C}$  for 45 min. The reaction mixture was diluted in more  $\text{CH}_2\text{Cl}_2$  and washed with diluted citric acid ( $\text{pH} = 4$ ) (1x), saturated  $\text{NaHCO}_3$  (1x), brine (1x), dried ( $\text{MgSO}_4$ ) and concentrated. Purification by chromatography on  $\text{SiO}_2$  (pentane/ $\text{Et}_2\text{O}$  9:1) afforded the corresponding TBS-protected product (680 mg, 1.90 mmol, 99%) as a clear oil.  $R_f = 0.38$  (hexane/ $\text{EtOAc}$  9:1). Optical rotation  $[\alpha]^{24.3}_{\text{D}}$  ( $c$  1.00,  $\text{CHCl}_3$ ) =  $+6.8^{\circ}$ .  $^1\text{H-NMR}$  (300 MHz,  $\text{CDCl}_3$ )  $\delta$  5.17 (q,  $J = 6.6$  Hz, 1 H), 3.85 (dd,  $J_1 = 8.5$  Hz,  $J_2 = 2.3$  Hz, 1 H), 3.69 (s, 3 H), 3.16 (s, 3 H), 3.06 (br. s, 1 H), 2.14 (d,  $J = 12.4$  Hz, 1 H), 1.86-1.78 (m, 1 H), 1.71-1.61 (m, 1 H), 1.56 (d,  $J = 6.6$  Hz, 3 H), 1.52 (s, 3 H), 1.14 (d,  $J = 7.0$  Hz, 3 H), 0.92 (s, 9 H), 0.73 (d,  $J = 6.8$  Hz, 3 H), 0.08 (s, 6 H).  $^{13}\text{C-NMR}$  (75 MHz,  $\text{CDCl}_3$ )  $\delta$  176.9, 134.3, 119.7, 77.3, 61.4, 44.2, 39.0, 35.9, 32.4, 26.3, 18.6, 15.9, 15.4, 13.4, 13.3,  $-3.4$ ,  $-3.5$ . Elemental analysis calcd for  $\text{C}_{19}\text{H}_{39}\text{NO}_3\text{Si}$ : [C] 63.82 %, [H] 10.99 %, [N] 3.92 %, [O] 13.42 %, [Si] 7.85 %; found [C] 63.79 %, [H] 11.00 %, [N] 4.10 %. LRMS-ESI 380.2 (100,  $[\text{M} + \text{Na}]^+$ ). FTIR  $\nu$  3369s, 2959m, 2931m, 2857m, 1662s, 1461m, 1382m, 1252m, 1176w, 1108m, 1049s, 997s, 869m, 833s, 773s  $\text{cm}^{-1}$ .

To a cooled ( $-78\text{ }^{\circ}\text{C}$ ) solution of the previously prepared TBS-protected product (663 mg, 1.85 mmol, 1.00 equiv) in THF (13.2 mL) was added DIBAL-H (1 M in hexane) (3.60 mL, 3.60 mmol, 2.00 equiv). The resulting solution was stirred at  $-78\text{ }^{\circ}\text{C}$  for 1 hour; then quenched by addition of saturated Rochelle's salt, diluted in  $\text{Et}_2\text{O}$  and vigorously stirred at RT for 1 hour. The aqueous layer was extracted with  $\text{Et}_2\text{O}$  (3x) and the combined organic phase dried ( $\text{MgSO}_4$ ) and concentrated (bath  $T < 20\text{ }^{\circ}\text{C}$ ). Purification by chromatography on  $\text{SiO}_2$  (hexane/ $\text{EtOAc}$  9.5:0.5) afforded aldehyde **28** (551 mg, 1.85 mmol, 100%) as a colorless oil.  $R_f = 0.70$  (cyclohexane/ $\text{EtOAc}$  9:1). Optical rotation  $[\alpha]^{25.0}_{\text{D}}$  ( $c$  0.20,  $\text{CHCl}_3$ ) =  $+53.5^{\circ}$ .  $^1\text{H-NMR}$  (400 MHz,  $\text{CDCl}_3$ )  $\delta$  9.85 (s, 1 H), 5.22 (q,  $J = 6.5$  Hz, 1 H), 4.00-3.98 (m, 1 H), 2.59-2.53 (m, 1 H), 2.16-2.09 (m, 1 H), 1.85-1.78 (m, 2 H), 1.60 (d,  $J = 6.7$  Hz, 3 H), 1.57 (s, 3 H), 1.10 (d,  $J = 7.0$  Hz, 3 H), 0.92 (s, 9 H), 0.78 (d,  $J = 6.1$  Hz, 3 H), 0.11 (s, 3 H), 0.06 (s, 3 H).  $^{13}\text{C-NMR}$  (100 MHz,  $\text{CDCl}_3$ )  $\delta$  205.7, 134.2, 120.9, 75.9, 51.4, 44.7, 35.1, 26.3, 18.7, 15.8, 14.7, 13.7, 9.7,  $-3.5$ ,  $-3.7$ . HRMS-ESI calcd for  $\text{C}_{17}\text{H}_{35}\text{O}_2\text{Si}$ :  $[\text{M} + \text{H}]^+$  299.2406, found 299.2419.

**(S)-3-((2S,3R,4R,5R,6S,E)-5-(tert-butyldimethylsilyloxy)-3-hydroxy-2,4,6,8-tetramethyldec-8-enoyl)-4-isopropyl-5,5-diphenyloxazolidin-2-one (29)**

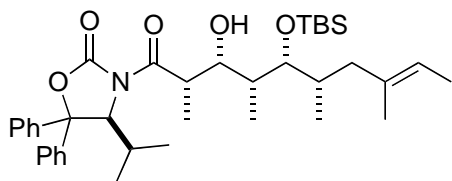

To a cooled ( $-5^{\circ}\text{C}$ ) solution of *ent*-**22** (81.0 mg, 0.24 mmol, 1.20 equiv) in  $\text{CH}_2\text{Cl}_2$  (0.48 mL) were sequentially added  $\text{Bu}_2\text{BOTf}$  (1 M in  $\text{CH}_2\text{Cl}_2$ ) (240  $\mu\text{L}$ , 0.24 mmol, 1.20 equiv) and  $\text{NEt}_3$  (39  $\mu\text{L}$ , 0.28 mmol, 1.40 equiv). Stirring at  $0^{\circ}\text{C}$  was continued for 45 minutes; then the resulting solution was cooled to  $-78^{\circ}\text{C}$  and aldehyde **28** (59 mg, 0.20 mmol, 1.00 equiv) in  $\text{CH}_2\text{Cl}_2$  (0.45 mL) was slowly added by canula. The reaction was stirred for 45 minutes at  $-78^{\circ}\text{C}$ , then allowed to return to  $0^{\circ}\text{C}$  over 3 hours. The reaction was quenched at  $0^{\circ}\text{C}$  by sequentially addition of buffer phosphate ( $\text{pH} = 7$ ) (0.24 mL), MeOH (0.72 mL) and MeOH/ $\text{H}_2\text{O}_2$  (2:1) (0.72 mL). The mixture was stirred at RT for 30 minutes before dilution with  $\text{Et}_2\text{O}$ , washed with HCl (0.5 M) (1x), saturated  $\text{NaHCO}_3$  (1x) and brine (1x), dried ( $\text{MgSO}_4$ ) and concentrated. The residue was purified by chromatography on  $\text{SiO}_2$  (hexane/ $\text{EtOAc}$  9.5:0.5) to afford **29** (77.0 mg, 0.12 mmol, 61%, *d.r.* > 97:3) as a white crystalline solid.  $R_f = 0.60$  (pentane/ $\text{Et}_2\text{O}$  7:3). M.p. =  $105\text{--}107^{\circ}\text{C}$ . Optical rotation  $[\alpha]^{25.0}_{\text{D}}$  ( $c$  0.29,  $\text{CHCl}_3$ ) =  $-118.6^{\circ}$ .  $^1\text{H-NMR}$  (400 MHz,  $\text{CDCl}_3$ )  $\delta$  7.52–7.51 (m, 2 H), 7.43–7.41 (m, 2 H), 7.37–7.26 (m, 6 H), 5.44 (d,  $J = 3.5$  Hz, 1 H), 5.24 (q,  $J = 6.3$  Hz, 1 H), 3.79–3.78 (m, 2 H), 3.50 (t,  $J = 3.8$  Hz, 1 H), 2.49 (br. s, 1 H), 2.12 (d,  $J = 12.3$  Hz, 1 H), 2.05–1.98 (m, 1 H), 1.82–1.76 (m, 1 H), 1.73–1.68 (m, 1 H), 1.62 (d,  $J = 6.6$  Hz, 3 H), 1.58 (s, 3 H), 1.53–1.49 (m, 1 H), 1.36 (d,  $J = 6.4$  Hz, 3 H), 0.89 (d,  $J = 7.1$  Hz, 3 H), 0.87 (s, 9 H), 0.80 (d,  $J = 6.8$  Hz, 3 H), 0.76 (d,  $J = 6.6$  Hz, 3 H), 0.67 (d,  $J = 6.9$  Hz, 3 H), 0.01 (s, 3 H),  $-0.24$  (s, 3 H).  $^{13}\text{C-NMR}$  (100 MHz,  $\text{CDCl}_3$ )  $\delta$  177.3, 152.7, 142.6, 138.3, 134.8, 129.3, 129.0, 128.8, 128.4, 126.2, 125.8, 120.4, 89.7, 77.1, 74.0, 64.3, 44.2, 40.9, 38.4, 35.9, 30.3, 26.5, 22.1, 18.8, 16.7, 15.9, 15.3, 13.9, 13.8, 9.4,  $-3.0$ ,  $-3.9$ . HRMS-ESI calcd for  $\text{C}_{38}\text{H}_{57}\text{NO}_5\text{NaSi}$ :  $[\text{M} + \text{Na}]^+$  658.3904, found 658.3911. FTIR  $\nu$  3360w, 2928m, 2857m, 1786m, 1693w, 1458w, 1374w, 1253w, 1210w, 1044w, 892w, 766w, 689w  $\text{cm}^{-1}$ .



**(2*S*,3*R*,4*R*,5*R*,6*S*,*E*)-5-(*tert*-butyldimethylsilyloxy)-3-hydroxy-*N*-methoxy-*N*,2,4,6,8--****pentamethyldec-8-enamide (30)**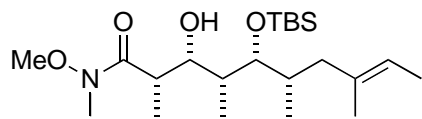

To a cooled (0 °C) suspension of MeONHMe·HCl (28.0 mg, 0.28 mmol, 6.00 equiv) in CH<sub>2</sub>Cl<sub>2</sub> (140 μL) was added AlMe<sub>3</sub> (2 M in toluene) (142 μL, 0.28 mmol, 6.00 equiv). The resulting solution was stirred at 0 °C for 5 minutes, then at RT for 45 minutes. The clear solution was cooled to 0 °C and **29** (30.0 mg, 0.05 mmol, 1.00 equiv) in CH<sub>2</sub>Cl<sub>2</sub> (100 μL) was added. Stirring at 0 °C was continued for 5 minutes, then at RT for 68 hours. The reaction was quenched by slow addition of diluted HCl solution (0.5 M) and stirred at RT for 1 hour. The aqueous layer was separated and extracted with CH<sub>2</sub>Cl<sub>2</sub> (3x). The combined organic phases were washed with saturated NaHCO<sub>3</sub> (1x) and brine (1x), dried (MgSO<sub>4</sub>) and concentrated. Purification by chromatography on SiO<sub>2</sub> (pentane/Et<sub>2</sub>O 6:4) afforded product **30** (8.1 mg, 0.02 mmol, 41%). *R<sub>f</sub>* = 0.19 (pentane/Et<sub>2</sub>O 1:1). Optical rotation [ $\alpha$ ]<sup>25.0</sup><sub>D</sub> (*c* 0.12, CHCl<sub>3</sub>) = −7.5°. <sup>1</sup>H-NMR (400 MHz, CDCl<sub>3</sub>) δ 5.19 (q, *J* = 6.21 Hz, 1 H), 3.83-3.79 (m, 1 H), 3.71 (s, 3 H), 3.54 (t, *J* = 3.5 Hz, 1 H), 3.21 (br s, 1 H), 3.19 (s, 3 H), 3.14 (br s, 1 H), 2.15 (d, *J* = 12.5 Hz, 1 H), 1.85-1.70 (m, 3 H), 1.57 (d, *J* = 7.3 Hz, 3 H), 1.55 (s, 3 H), 1.19 (d, *J* = 7.0 Hz, 3 H), 0.97 (d, *J* = 7.0 Hz, 3 H), 0.91 (s, 9 H), 0.78 (d, *J* = 6.6 Hz, 3 H), 0.07 (s, 3 H), 0.06 (s, 3 H). <sup>13</sup>C-NMR (100 MHz, CDCl<sub>3</sub>) δ 178.4, 134.8, 120.5, 78.6, 74.5, 62.0, 44.6, 39.2, 38.1, 35.9, 26.6, 18.9, 15.9, 15.6, 13.8, 12.6, 10.7, −3.1, −3.5. HRMS-ESI calcd for C<sub>22</sub>H<sub>45</sub>NO<sub>4</sub>SiNa: [M + Na]<sup>+</sup> 438.3016, found 338.3010. FTIR ν 3456w, 2959m, 2931m, 2858w, 1642w, 1462w, 1384w, 1254w, 1095w, 1041m, 1001m, 834m, 776s, 677m, 630m cm<sup>−1</sup>.

**(2*S*,3*R*,4*R*,5*R*,6*S*,*E*)-5-(*tert*-butyldimethylsilyloxy)-3-hydroxy-2,4,6,8-tetramethyldec-8-enal (31)**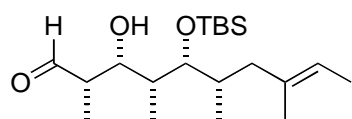

To a cooled (−17 °C) solution of **29** (320 mg, 0.50 mmol, 1.00 equiv) in toluene (10 mL) was slowly added a solution of LiAlH<sub>4</sub> (1 M in Et<sub>2</sub>O) (1.00 mL, 1.00 mmol, 2.00 equiv). The resulting solution was stirred for 20 minutes, then quenched at −17 °C by dropwise addition of saturated Rochelle's salt and diluted in Et<sub>2</sub>O. The mixture was vigorously stirred at RT for 2 hours, then extracted with Et<sub>2</sub>O (3x) and the combined organic phase dried (MgSO<sub>4</sub>) and concentrated (bath T < 20 °C). The residue was diluted in Et<sub>2</sub>O and the precipitated cleaved auxiliary recovered. The filtered was concentrated and the residue purified by chromatography on SiO<sub>2</sub> (pentane/Et<sub>2</sub>O 9:1) to afford aldehyde **31** (149 mg, 0.42 mmol, 83%) as a colorless oil. *R<sub>f</sub>* = 0.28 (pentane/Et<sub>2</sub>O 7:3). Optical rotation [ $\alpha$ ]<sup>25.0</sup><sub>D</sub> (*c* 0.08, CHCl<sub>3</sub>) = −23.8°. <sup>1</sup>H-NMR (400 MHz, CDCl<sub>3</sub>) δ 9.73 (d, *J* = 1.2 Hz, 1 H), 5.21 (q, *J* = 6.4 Hz, 1 H), 4.03 (q, *J* = 5.2 Hz,

1 H), 3.58 (dd,  $J_1 = 4.2$  Hz,  $J_2 = 2.9$  Hz, 1 H), 2.68-2.62 (m, 1 H), 2.20 (d,  $J = 12.3$  Hz, 1 H), 1.97 (d,  $J = 4.4$  Hz, 1 H), 1.89-1.77 (m, 2 H), 1.76-1.67 (m, 1 H), 1.60 (d,  $J = 6.8$  Hz, 3 H), 1.57 (s, 3 H), 1.17 (d,  $J = 7.1$  Hz, 3 H), 1.00 (d,  $J = 6.9$  Hz, 3 H), 0.94 (s, 9 H), 0.81 (d,  $J = 6.7$  Hz, 3 H), 0.11 (s, 3 H), 0.09 (s, 3 H).  $^{13}\text{C}$ -NMR (100 MHz,  $\text{CDCl}_3$ )  $\delta$  204.8, 134.5, 120.7, 78.2, 73.2, 50.1, 44.3, 39.3, 36.1, 26.5, 18.8, 15.8, 13.7, 10.0, 8.8, -2.8, -3.5. HRMS-ESI calcd for  $\text{C}_{20}\text{H}_{40}\text{O}_3\text{SiNa}$ :  $[\text{M} + \text{Na}]^+$  379.2644, found 379.2639. FTIR  $\nu$  2957 $m$ , 2931 $m$ , 2859 $m$ , 1727 $w$ , 1462 $w$ , 1384 $w$ , 1255 $w$ , 1096 $w$ , 1032 $w$ , 837 $w$ , 775 $w$   $\text{cm}^{-1}$ .

**(2E,4R,5S,6R,7R,8S,10E)-ethyl 7-(tert-butyldimethylsilyloxy)-5-hydroxy-2,4,6,8,10-pentamethyl-dodeca-2,10-dienoate (32)**

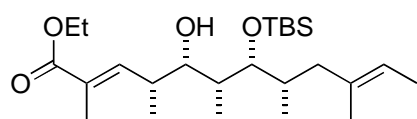

To a solution of aldehyde **31** (61.1 mg, 0.17 mmol, 1.00 equiv) in toluene (1.7 mL) was added 1-carbethoxyethylidetriphenylphosphorane (123.2 mg, 0.34 mmol, 2.00 equiv) and the mixture was stirred at 35 °C for 5 hours. The reaction was diluted in pentane, filtered over cotton and concentrated. The residue was purified by chromatography on  $\text{SiO}_2$  (pentane/ $\text{Et}_2\text{O}$  9:1) to afford **32** (73.8 mg, 0.17 mmol, 99%,  $d.r.$  > 97:3).  $R_f = 0.39$  (pentane/ $\text{Et}_2\text{O}$  8:2). Optical rotation  $[\alpha]^{25.0}_{\text{D}}$  ( $c$  0.09,  $\text{CHCl}_3$ ) = +24.7°.  $^1\text{H}$ -NMR (400 MHz,  $\text{CDCl}_3$ )  $\delta$  6.53 (dd,  $J_1 = 10.5$  Hz,  $J_2 = 1.2$  Hz, 1 H), 5.21 (q,  $J = 6.2$  Hz, 1 H), 4.27-4.15 (m, 2 H), 3.65 (t,  $J = 3.9$  Hz, 1 H), 3.53-3.49 (m, 1 H), 2.70-2.60 (m, 1 H), 2.17 (d,  $J = 12.6$  Hz, 1 H), 1.93 (d,  $J = 4.3$  Hz, 1 H), 1.89 (d,  $J = 1.1$  Hz, 3 H), 1.87-1.82 (m, 1 H), 1.80-1.74 (m, 1 H), 1.72-1.66 (m, 1 H), 1.59 (d,  $J = 6.6$  Hz, 3 H), 1.57 (s, 3 H), 1.31 (t,  $J = 7.1$  Hz, 3 H), 1.10 (d,  $J = 6.6$  Hz, 3 H), 0.94 (s, 9 H), 0.87 (d,  $J = 7.0$  Hz, 3 H), 0.77 (d,  $J = 6.7$  Hz, 3 H), 0.12 (s, 3 H), 0.11 (s, 3 H).  $^{13}\text{C}$ -NMR (100 MHz,  $\text{CDCl}_3$ )  $\delta$  168.5, 144.0, 134.7, 127.7, 120.5, 79.9, 78.6, 60.9, 44.1, 39.0, 38.0, 35.7, 26.5, 18.7, 16.9, 15.9, 15.0, 14.6, 13.7, 13.0, 8.8, -2.8, -3.7. HRMS-ESI calcd for  $\text{C}_{25}\text{H}_{49}\text{O}_4\text{Si}$ :  $[\text{M} + \text{H}]^+$  441.3400, found 441.3404. FTIR  $\nu$  3519 $w$ , 2959 $m$ , 2923 $m$ , 2858 $m$ , 1712 $m$ , 1650 $w$ , 1462 $w$ , 1369 $w$ , 1252 $m$ , 1094 $m$ , 1038 $m$ , 835 $m$ , 773 $m$ , 675 $m$   $\text{cm}^{-1}$ .

**(2*E*,4*R*,5*S*,6*R*,7*R*,8*S*,10*E*)-7-(*tert*-butyldimethylsilyloxy)-5-hydroxy-2,4,6,8,10-pentamethyldodeca-2,10-dienal (33)**

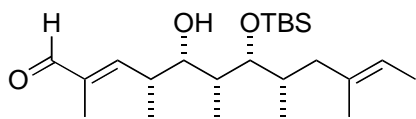

To a cooled ( $-78\text{ }^{\circ}\text{C}$ ) solution of **32** (67.0 mg, 0.15 mmol, 1.00 equiv) in THF (1.6 mL) was slowly added DIBAL-H (1M in hexane) (800  $\mu\text{L}$ , 0.80 mmol, 5.30 equiv). The resulting solution was allowed to return to  $-15\text{ }^{\circ}\text{C}$  and stirred from  $-15\text{ }^{\circ}\text{C}$  to  $-5\text{ }^{\circ}\text{C}$  over 1.5 hours. The reaction was quenched by addition of MeOH, diluted in saturated Rochelle's salt and Et<sub>2</sub>O and vigorously stirred at RT for 1 hour. The aqueous layer was extracted with Et<sub>2</sub>O (3x) and the combined organic phase dried (MgSO<sub>4</sub>) and concentrated (bath  $T < 25\text{ }^{\circ}\text{C}$ ). Purification by chromatography on SiO<sub>2</sub> (pentane/Et<sub>2</sub>O 9:1  $\rightarrow$  7:3) afforded the corresponding diol (56.3 mg, 0.14 mmol, 93%) as a colorless oil.  $R_f = 0.15$  (pentane/Et<sub>2</sub>O 7:3). Optical rotation  $[\alpha]^{22.5}_{\text{D}} (c\ 0.41, \text{CHCl}_3) = -1.0^{\circ}$ . <sup>1</sup>H-NMR (400 MHz, CDCl<sub>3</sub>)  $\delta$  5.23-5.17 (m, 2 H), 4.01 (s, 2 H), 3.63-3.60 (m, 1 H), 3.39 (d,  $J = 8.8\text{ Hz}$ , 1 H), 2.59-2.49 (m, 1 H), 2.16 (d,  $J = 12.2\text{ Hz}$ , 1 H), 1.91-1.75 (m, 4 H), 1.71 (d,  $J = 0.5\text{ Hz}$ , 3 H), 1.59 (d,  $J = 7.0\text{ Hz}$ , 3 H), 1.57 (s, 3 H), 1.04 (d,  $J = 6.6\text{ Hz}$ , 3 H), 0.93 (s, 9 H), 0.88 (d,  $J = 7.0\text{ Hz}$ , 3 H), 0.76 (d,  $J = 6.6\text{ Hz}$ , 3 H), 0.11 (s, 3 H), 0.10 (s, 3 H). <sup>13</sup>C-NMR (100 MHz, CDCl<sub>3</sub>)  $\delta$  135.0, 134.8, 129.1, 120.4, 79.9, 78.9, 69.2, 44.3, 38.5, 36.8, 35.6, 26.5, 18.8, 17.8, 15.9, 14.9, 14.3, 13.8, 9.0,  $-2.8$ ,  $-3.6$ . HRMS-ESI calcd for C<sub>23</sub>H<sub>46</sub>O<sub>3</sub>NaSi:  $[\text{M} + \text{Na}]^+$  421.3114, found 421.3116. FTIR  $\nu$  3349 $m$ , 2956 $m$ , 2930 $m$ , 2860 $m$ , 1459 $w$ , 1383 $w$ , 1253 $m$ , 1070 $m$ , 1035 $m$ , 1011 $m$ , 836 $m$ , 775 $m$ , 676 $m\text{ cm}^{-1}$ .

To a solution of the previously prepared diol (121 mg, 0.30 mmol, 1.00 equiv) in CH<sub>2</sub>Cl<sub>2</sub> (3.0 mL), MnO<sub>2</sub> (396 mg, 4.50 mmol, 15.0 equiv) was added. The mixture was stirred at RT for 2.5 hours, then filtered over Celite, rinsed with CH<sub>2</sub>Cl<sub>2</sub> and concentrated (bath  $T < 25\text{ }^{\circ}\text{C}$ ). The  $\alpha,\beta$ -unsaturated aldehyde **33** (103 mg, 0.26 mmol, 86%) crystallized under high vacuum. An analytical sample was recrystallized (hexane) for X-ray analysis and the rest directly used in the next step without further purification (crystallographic data are given at the end of the experimental part).  $R_f = 0.37$  (pentane/Et<sub>2</sub>O 7:3). M.p. =  $75\text{--}77\text{ }^{\circ}\text{C}$ . Optical rotation  $[\alpha]^{22.5}_{\text{D}} (c\ 0.82, \text{CHCl}_3) = -10.9^{\circ}$ . <sup>1</sup>H-NMR (400 MHz, CDCl<sub>3</sub>)  $\delta$  9.42 (s, 1 H), 6.27 (dd,  $J_1 = 10.3\text{ Hz}$ ,  $J_2 = 1.0\text{ Hz}$ , 1 H), 5.21 (q,  $J = 6.3\text{ Hz}$ , 1 H), 3.65 (t,  $J = 3.8\text{ Hz}$ , 1 H), 3.59-3.56 (m, 1 H), 2.92-2.82 (m, 1 H), 2.18 (d,  $J = 12.8\text{ Hz}$ , 1 H), 2.00 (d,  $J = 4.2\text{ Hz}$ , 1 H), 1.92-1.83 (m, 1 H), 1.81 (d,  $J = 0.9\text{ Hz}$ , 3 H), 1.79-1.73 (m, 1 H), 1.66-1.63 (m, 1 H), 1.60 (d,  $J = 7.1\text{ Hz}$ , 3 H), 1.57 (s, 3 H), 1.16 (d,  $J = 6.6\text{ Hz}$ , 3 H), 0.94 (s, 9 H), 0.90 (d,  $J = 7.0\text{ Hz}$ , 3 H), 0.77 (d,  $J = 6.8\text{ Hz}$ , 3 H), 0.13 (s, 3 H), 0.11 (s, 3 H). <sup>13</sup>C-NMR (100 MHz, CDCl<sub>3</sub>)  $\delta$  195.6, 156.4, 139.1, 134.5, 120.6, 79.8, 78.1, 44.1, 39.3, 38.3, 35.7, 26.5, 18.7, 16.7, 15.9, 15.2, 13.8, 9.9, 8.9,  $-2.8$ ,  $-3.7$ . HRMS-ESI calcd for

$C_{23}H_{44}O_3SiNa$ :  $[M + Na]^+$  419.2957, found 419.2960. FTIR  $\nu$  3520w, 2961m, 2928m, 2889m, 2885m, 1667m, 1635w, 1459w, 1378w, 1251w, 1096w, 1073w, 1040w, 1011m, 974w, 883m, 772m, 681m  $cm^{-1}$ .

**(1E,3E,5R,6S,7R,8R,9S,11E)-8-(tert-butyldimethylsilyloxy)-1-iodo-3,5,7,9,11-pentamethyltrideca-1,3,11-trien-6-ol (34)**

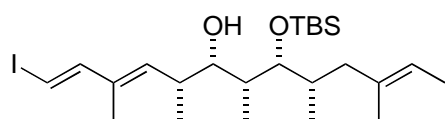

To a cooled ( $-5\text{ }^{\circ}C$ ) suspension of  $CrCl_2$  (446 mg, 3.63 mmol, 24.00 equiv) in dry THF (4.4 mL) was slowly added a solution of  $\alpha,\beta$ -unsaturated aldehyde **33** (60.0 mg, 0.15 mmol, 1.00 equiv) and  $CHI_3$  (358 mg, 0.91 mmol, 6.00 equiv) in THF (4.4 mL). The dark brown mixture was covered with an aluminium foil and stirred between  $-5$  and  $0\text{ }^{\circ}C$  for 2.5 hours. The mixture was quenched by addition of water and extracted with  $Et_2O$  (3x). The combined organic layers were washed with saturated sodium thiosulfate (1x), water (1x), dried ( $MgSO_4$ ) and concentrated (bath  $T < 20\text{ }^{\circ}C$ ). Purification by chromatography on  $SiO_2$  (pentane/ $Et_2O$  9:1) afforded vinyl iodide **34** (78.4 mg, 0.15 mmol, quant., *d.r.* > 97:3) as a colorless oil.  $R_f = 0.68$  (pentane/ $Et_2O$  7:3). Optical rotation  $[\alpha]^{22.4}_D (c\ 0.60, CHCl_3) = +25.4^{\circ}$ .  $^1H$ -NMR (400 MHz,  $CDCl_3$ )  $\delta$  7.04 (d,  $J = 14.6$  Hz, 1 H), 6.20 (d,  $J = 14.6$  Hz, 1 H), 5.24-5.19 (m, 2 H), 3.63 (t,  $J = 3.9$  Hz, 1 H), 3.43-3.40 (m, 1 H), 2.65-2.56 (m, 1 H), 2.17 (d,  $J = 12.3$  Hz, 1 H), 1.87 (d,  $J = 4.3$  Hz, 1 H), 1.86-1.82 (m, 1 H), 1.77 (d,  $J = 0.7$  Hz, 3 H), 1.76-1.70 (m, 2 H), 1.60 (d,  $J = 6.9$  Hz, 3 H), 1.58 (s, 3 H), 1.06 (d,  $J = 6.6$  Hz, 3 H), 0.94 (s, 9 H), 0.86 (d,  $J = 7.0$  Hz, 3 H), 0.77 (d,  $J = 6.6$  Hz, 3 H), 0.12 (s, 3 H), 0.11 (s, 3 H).  $^{13}C$ -NMR (100 MHz,  $CDCl_3$ )  $\delta$  150.0, 137.0, 134.7, 134.3, 120.5, 80.0, 78.8, 74.1, 44.2, 38.8, 37.4, 35.7, 26.5, 18.8, 17.6, 15.9, 15.0, 13.8, 12.6, 8.8,  $-2.7$ ,  $-3.6$ . HRMS-ESI calcd for  $C_{24}H_{45}O_2SiNa$ :  $[M + Na]^+$  543.2131, found 543.2133. FTIR  $\nu$  3482w, 2958m, 2929m, 2858m, 1461w, 1387w, 1254w, 1091w, 1039w, 980w, 950w, 836w, 774w, 678w  $cm^{-1}$ .

**(2E,4R,5S,6S,7R,8S,10E)-7-(tert-butyldimethylsilyloxy)-2,4,6,8,10-pentamethyl-5-(trimethylsilyloxy)dodeca-2,10-dienal (35)**

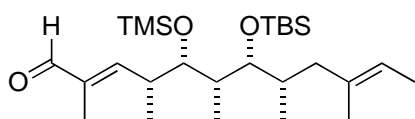

To a cooled ( $-5\text{ }^{\circ}C$ ) solution of **32** (7.6 mg, 0.017 mmol, 1.00 equiv) in  $CH_2Cl_2$  (170  $\mu L$ ) were sequentially added DMAP (2.0 mg, 0.017 mmol, 1.00 equiv),  $NEt_3$  (14  $\mu L$ , 0.102 mmol, 6.00 equiv) and  $TMSCl$  (6.6  $\mu L$ , 0.052 mmol, 3.00 equiv). The resulting solution was stirred at  $0\text{ }^{\circ}C$  for 1 hour; then quenched by addition of saturated  $NH_4Cl$  and extracted with  $CH_2Cl_2$  (3x). The combined organic layers were dried

(MgSO<sub>4</sub>) and concentrated. Purification by chromatography on SiO<sub>2</sub> (pentane/Et<sub>2</sub>O 9.75:0.25) afforded the protected  $\alpha,\beta$ -unsaturated ester (6.7 mg, 0.13 mmol, 77%).  $R_f$  = 0.76 (pentane/Et<sub>2</sub>O 9:1). Optical rotation  $[\alpha]^{25.0}_D$  (*c* 0.285, CHCl<sub>3</sub>) = +14.4°. <sup>1</sup>H-NMR (400 MHz, CDCl<sub>3</sub>)  $\delta$  6.59 (dd,  $J_1$  = 10.4 Hz,  $J_2$  = 1.0 Hz, 1 H), 5.20-5.17 (m, 1 H), 4.26-4.10 (m, 2 H), 3.49 (dd,  $J_1$  = 6.0 Hz,  $J_2$  = 4.3 Hz, 1 H), 3.42 (dd,  $J_1$  = 7.0 Hz,  $J_2$  = 2.1 Hz, 1 H), 2.73-2.64 (m, 1 H), 2.03 (d,  $J$  = 12.7 Hz, 1 H), 1.91 (d,  $J$  = 10.9 Hz, 1 H), 1.85 (d,  $J$  = 1.0 Hz, 3 H), 1.82-1.76 (s, 1 H), 1.72-1.64 (s, 1 H), 1.59-1.56 (m, 6 H), 1.28 (t,  $J$  = 7.1 Hz, 3 H), 0.97 (d,  $J$  = 6.7 Hz, 3 H), 0.91 (s, 9 H), 0.85 (d,  $J$  = 6.9 Hz, 3 H), 0.70 (d,  $J$  = 6.5 Hz, 3 H), 0.15 (s, 9 H), 0.05 (s, 3 H), 0.02 (s, 3 H). <sup>13</sup>C-NMR (100 MHz, CDCl<sub>3</sub>)  $\delta$  168.6, 145.2, 134.6, 127.0, 120.6, 77.5, 77.4, 60.8, 45.8, 40.6, 37.8, 35.0, 26.7, 19.0, 16.0, 15.9, 14.6, 13.8, 13.0, 12.6, 12.0, 1.3, -2.6, -2.9. HRMS-ESI calcd for C<sub>28</sub>H<sub>56</sub>O<sub>4</sub>Si<sub>2</sub>Na: [M + Na]<sup>+</sup> 535.3615, found 535.3610. FTIR  $\nu$  2958*m*, 2932*m*, 2859*w*, 1714*m*, 1460*w*, 1384*w*, 1252*m*, 1096*m*, 1032*m*, 836*m*, 772*w*, 750*w*, 676*w*, 631*s* cm<sup>-1</sup>.

To a cooled (-78 °C) solution of the previously prepared compound (5.5 mg, 0.01 mmol, 1.00 equiv) in CH<sub>2</sub>Cl<sub>2</sub> (100  $\mu$ L) was slowly added DIBAL-H (1 M in hexane) (20  $\mu$ L, 0.02 mmol, 2.00 equiv). The resulting solution was stirred at -78 °C for 1 hour, then quenched by addition of MeOH (0.1 mL), saturated Rochelle's salt (2 mL), diluted in more CH<sub>2</sub>Cl<sub>2</sub> (2 mL) and vigorously stirred at RT for 1 hour. The aqueous layer was extracted with CH<sub>2</sub>Cl<sub>2</sub> (3x) and the combined organic layers dried (MgSO<sub>4</sub>) and concentrated (bath T < 20 °C). Purification by chromatography on SiO<sub>2</sub> (pentane/Et<sub>2</sub>O 9:1) afforded the corresponding primary alcohol (4.7 mg, 0.01 mmol, 100%) as a colorless oil.  $R_f$  = 0.19 (cyclohexane/EtOAc 9:1). Optical rotation  $[\alpha]^{25.0}_D$  (*c* 0.29, CHCl<sub>3</sub>) = +1.7°. <sup>1</sup>H-NMR (400 MHz, CDCl<sub>3</sub>)  $\delta$  5.23-5.21 (m, 2 H), 4.02 (d,  $J$  = 5.7 Hz, 2 H), 3.45-3.41 (m, 2 H), 2.64-2.54 (s, 1 H), 2.03 (d,  $J$  = 12.0 Hz, 1 H), 1.94 (t,  $J$  = 11.8 Hz, 1 H), 1.86-1.78 (m, 1 H), 1.78-1.72 (m, 1 H), 1.70 (s, 3 H), 1.61-1.59 (m, 6 H), 0.95 (d,  $J$  = 7.0 Hz, 3 H), 0.93 (s, 9 H), 0.87 (d,  $J$  = 6.9 Hz, 3 H), 0.71 (d,  $J$  = 6.6 Hz, 3 H), 0.16 (s, 9 H), 0.08 (s, 3 H), 0.06 (s, 3 H). <sup>13</sup>C-NMR (100 MHz, CDCl<sub>3</sub>)  $\delta$  134.7, 134.3, 130.1, 120.6, 78.1, 77.8, 69.3, 46.0, 40.2, 36.8, 34.7, 26.7, 19.0, 17.5, 16.0, 14.4, 13.8, 12.3, 11.9, 1.4, -2.5, -2.9. FTIR  $\nu$  3314*w*, 2958*m*, 2929*m*, 2858*w*, 1462*w*, 1381*w*, 1251*m*, 1127*w*, 1105*w*, 1061*w*, 1032*m*, 866*w*, 836*m*, 772*w* cm<sup>-1</sup>.

To a solution of the previously prepared primary alcohol (5.2 mg, 0.011 mmol, 1.00 equiv) in CH<sub>2</sub>Cl<sub>2</sub> (110  $\mu$ L) was added MnO<sub>2</sub> (14.7 mg, 0.165 mmol, 15.0 equiv). The mixture was stirred at RT for 3.5 hours, then filtered over Celite, rinsed with CH<sub>2</sub>Cl<sub>2</sub> and concentrated (bath T < 20 °C). The  $\alpha,\beta$ -unsaturated aldehyde **35** was obtained in quantitative yield and directly used in the next step without further purification.  $R_f$  = 0.60 (pentane/Et<sub>2</sub>O 9:1). Optical rotation  $[\alpha]^{25.0}_D$  (*c* 0.27, CHCl<sub>3</sub>) = -1.9°. <sup>1</sup>H-NMR (400 MHz, CDCl<sub>3</sub>)  $\delta$  9.41 (s, 1 H), 6.32 (d,  $J$  = 10.3 Hz, 1 H), 5.23-5.22 (m, 1 H), 3.58 (dd,  $J_1$  = 6.5 Hz,  $J_2$  = 4.0 Hz, 1 H), 3.45 (dd,  $J_1$  = 7.1 Hz,  $J_2$  = 2.1 Hz, 1 H), 2.97-2.89 (m, 1 H), 2.05 (d,  $J$  =

12.5 Hz, 1 H), 1.93 (d,  $J = 11.0$  Hz, 1 H), 1.84-1.82 (m, 1 H), 1.80 (d,  $J = 0.7$  Hz, 3 H), 1.70-1.65 (m, 1 H), 1.62-1.60 (m, 6 H), 1.06 (d,  $J = 6.7$  Hz, 3 H), 0.93 (s, 9 H), 0.89 (d,  $J = 6.9$  Hz, 3 H), 0.72 (d,  $J = 6.6$  Hz, 3 H), 0.18 (s, 9 H), 0.09 (s, 3 H), 0.08 (s, 3 H).  $^{13}\text{C}$ -NMR (100 MHz,  $\text{CDCl}_3$ )  $\delta$  195.7, 157.5, 138.5, 134.5, 120.8, 77.5, 77.0, 45.8, 40.9, 38.3, 34.9, 26.7, 19.0, 16.1, 16.0, 13.8, 12.7, 12.0, 9.9, 1.4, -2.6, -2.9. HRMS-ESI calcd for  $\text{C}_{26}\text{H}_{53}\text{O}_3\text{Si}_2$ :  $[\text{M}]^+$  469.3533, found 469.3534. FTIR  $\nu$  2959 $m$ , 2930 $m$ , 2858 $w$ , 1694 $m$ , 1471 $w$ , 1462 $w$ , 1381 $w$ , 1252 $m$ , 1123 $w$ , 1107 $w$ , 1031 $m$ , 837 $m$ , 772 $w$ , 631 $s$   $\text{cm}^{-1}$ .

**(4*S*,5*S*,6*R*)-4-((*R*,3*E*,5*E*)-6-iodo-4-methylhexa-3,5-dien-2-yl)-2,2,5,8,8,9,9-heptamethyl-6-((*S*,*E*)-4-methylhex-4-en-2-yl)-3,7-dioxa-2,8-disiladecane (36)**

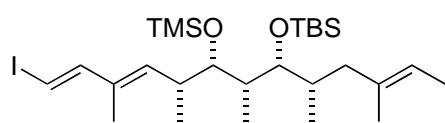

To a cooled ( $-5$  °C) suspension of  $\text{CrCl}_2$  (11.0 mg, 0.088 mmol, 8.00 equiv) in dry THF (300  $\mu\text{L}$ ) was added a solution of  $\alpha,\beta$ -unsaturated aldehyde **35** (5.1 mg, 0.011 mmol, 1.00 equiv) and  $\text{CHI}_3$  (9.0 mg, 0.022 mmol, 2.00 equiv) in THF (200  $\mu\text{L}$ ). The dark brown mixture was covered with an aluminium foil and stirred at  $0$  °C for 2.5 hours. The mixture was diluted with  $\text{Et}_2\text{O}$  (2 mL) and water (1.5 mL) and the aqueous phase extracted with  $\text{Et}_2\text{O}$  (3x). The combined organic layers were washed with water (2x), saturated sodium thiosulfate solution (1x), dried ( $\text{MgSO}_4$ ) and concentrated (bath  $T < 20$  °C). Purification by chromatography on  $\text{SiO}_2$  (pentane 100%) afforded vinyl iodide **36** (5.7 mg, 0.010 mmol, 88%,  $d.r. > 95:5$ ) as a colorless oil.  $R_f = 0.16$  (pentane 100%). Optical rotation  $[\alpha]^{25.0}_{\text{D}}$  ( $c$  0.105,  $\text{CHCl}_3$ ) =  $+24.8^\circ$ .  $^1\text{H}$ -NMR (400 MHz,  $\text{CDCl}_3$ )  $\delta$  7.02 (d,  $J = 14.6$  Hz, 1 H), 6.19 (d,  $J = 14.6$  Hz, 1 H), 5.26 (d,  $J = 10.2$  Hz, 1 H), 5.23 (dd,  $J_1 = 12.8$  Hz,  $J_2 = 6.7$  Hz, 1 H), 3.46-3.43 (m, 2 H), 2.70-2.61 (m, 1 H), 2.03 (d,  $J = 11.9$  Hz, 1 H), 1.94 (t,  $J = 11.8$  Hz, 1 H), 1.83-1.78 (m, 1 H), 1.76 (s, 3 H), 1.73-1.69 (m, 1 H), 1.62-1.61 (m, 6 H), 0.96 (d,  $J = 6.7$  Hz, 3 H), 0.93 (s, 9 H), 0.85 (d,  $J = 6.8$  Hz, 3 H), 0.71 (d,  $J = 6.6$  Hz, 3 H), 0.16 (s, 9 H), 0.07 (s, 3 H), 0.04 (s, 3 H).  $^{13}\text{C}$ -NMR (100 MHz,  $\text{CDCl}_3$ )  $\delta$  150.0, 138.1, 134.6, 133.8, 120.7, 77.8, 73.9, 46.0, 40.5, 37.4, 34.7, 30.1, 26.7, 19.0, 17.3, 16.0, 13.8, 12.6, 12.4, 11.9, 1.4, -2.6, -2.8. HRMS-ESI calcd for  $\text{C}_{27}\text{H}_{53}\text{O}_2\text{Si}_2\text{Na}$ :  $[\text{M} + \text{Na}]^+$  615.2527, found 615.2536. FTIR  $\nu$  2958 $m$ , 2928 $m$ , 2857 $w$ , 1461 $w$ , 1381 $w$ , 1253 $w$ , 1105 $w$ , 1032 $w$ , 890 $w$ , 836 $w$ , 772 $w$ , 631 $s$   $\text{cm}^{-1}$ .

## 2.4. The Suzuki $sp^3$ - $sp^2$ Cross Coupling and Synthesis Completion

**(2*E*,5*S*,6*R*,7*R*,8*S*,9*R*,10*E*,12*E*,15*R*,16*Z*,18*E*)-6-(*tert*-butyldimethylsilyloxy)-19-((2*R*,6*R*)-6-isopropoxy-3,6-dihydro-2*H*-pyran-2-yl)-3,5,7,9,11,15,17-heptamethylnonadeca-2,10,12,16,18-pentaen-8-ol (39)**

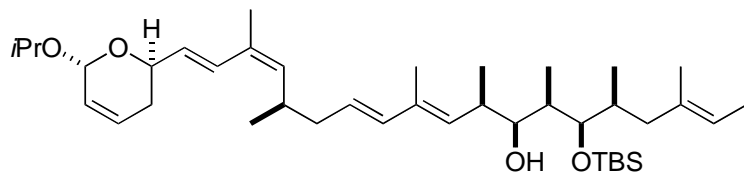

To a solution of alkyl iodide **20** (29.0 mg, 0.077 mmol, 1.30 equiv) in Et<sub>2</sub>O (850  $\mu$ L) was added 9-MeO-9-BBN (1 M in hexane) (202  $\mu$ L, 0.202 mmol, 3.42 equiv). The

resulting solution was cooled to  $-78\text{ }^{\circ}\text{C}$  and treated with *t*BuLi (1.5 M in pentane) (118  $\mu$ L, 0.177 mmol, 3.00 equiv). After 5 minutes THF (850  $\mu$ L) was added and the solution allowed to return to RT; stirring was continued for 1 hour. Separately in another flask vinyl iodide **34** (30.7 mg, 0.059 mmol, 1.00 equiv) was taken up in DMF (850  $\mu$ L) to which Pd(dppf)Cl<sub>2</sub>•CH<sub>2</sub>Cl<sub>2</sub> (2.2 mg, 0.003 mmol, 0.05 equiv), AsPh<sub>3</sub> (2.8 mg, 0.009, 0.15 equiv), Cs<sub>2</sub>CO<sub>3</sub> (77.0 mg, 0.236 mmol, 4.0 equiv) and H<sub>2</sub>O (26  $\mu$ L, 1.416 mmol, 24 equiv) were sequentially added. The alkyl boronate solution was transferred in the DMF solution and the resulting red-brown mixture stirred at RT overnight. The reaction was diluted with water and extracted with Et<sub>2</sub>O (3x). The combined organic layers were washed with water (1x) and brine (1x), dried (MgSO<sub>4</sub>) and concentrated. Purification by chromatography on SiO<sub>2</sub> (pentane/Et<sub>2</sub>O 92.5:7.5) afforded **39** (30.2 mg, 0.047 mmol, 80%) as a pale yellow oil.  $R_f$  = 0.13 (pentane/Et<sub>2</sub>O 9:1). Optical rotation  $[\alpha]^{22.0}_D$  (*c* 0.34, CHCl<sub>3</sub>) = +52.1°. <sup>1</sup>H-NMR (400 MHz, CDCl<sub>3</sub>)  $\delta$  6.70 (d, *J* = 15.7 Hz, 1 H), 6.06-6.02 (m, 1 H), 6.02 (d, *J* = 15.5 Hz, 1 H), 5.77-5.70 (m, 2 H), 5.53 (dt, *J*<sub>1</sub> = 15.5 Hz, *J*<sub>2</sub> = 7.2 Hz, 1 H), 5.24-5.18 (m, 2 H), 5.15 (s, 1 H), 5.09 (d, *J* = 9.9 Hz, 1 H), 4.57-4.51 (m, 1 H), 4.05 (sept., *J* = 6.2 Hz, 1 H), 3.63-3.61 (m, 1 H), 3.39 (dd, *J*<sub>1</sub> = 8.86 Hz, *J*<sub>2</sub> = 2.57 Hz, 1 H), 2.75-2.68 (m, 1 H), 2.65-2.55 (m, 1 H), 2.20-2.02 (m, 5 H), 1.90-1.86 (m, 1 H), 1.84 (s, 3 H), 1.81-1.78 (m, 3 H), 1.75 (s, 3 H), 1.59 (d, *J* = 5.5 Hz, 3 H), 1.57 (s, 3 H), 1.27 (d, *J* = 6.2 Hz, 3 H), 1.21 (d, *J* = 6.1 Hz, 3 H), 1.05 (d, *J* = 6.5 Hz, 3 H), 0.99 (d, *J* = 6.6 Hz, 3 H), 0.94 (s, 9 H), 0.86 (d, *J* = 7.0 Hz, 3 H), 0.76 (d, *J* = 6.6 Hz, 3 H), 0.11 (s, 3 H), 0.10 (s, 3 H). <sup>13</sup>C-NMR (100 MHz, CDCl<sub>3</sub>)  $\delta$  137.9, 136.5, 134.8, 133.5, 133.4, 130.4, 129.6, 128.9, 128.6, 126.5, 126.3, 120.3, 93.7, 79.9, 79.1, 70.0, 67.4, 44.3, 41.2, 38.6, 37.3, 35.6, 32.5, 31.2, 26.6, 24.3, 22.5, 20.9, 20.8, 18.8, 18.0, 15.9, 14.9, 13.8, 13.2, 8.9,  $-2.8$ ,  $-3.6$ . HRMS-ESI calcd for C<sub>40</sub>H<sub>70</sub>O<sub>4</sub>SiNa: [M + Na]<sup>+</sup> 665.4941, found 665.4946. FTIR  $\nu$  3503w, 2962m, 2928m, 2859m, 1459w, 1381w, 1317w, 1253w, 1181w, 1099m, 1029m, 1001m, 964m, 836w, 774w, 718w, 678w cm<sup>-1</sup>.

**(2E,5S,6R,7R,8S,9R,10E,12E,15R,16Z,18E)-6-(tert-butyldimethylsilyloxy)-17-ethyl-19-((2R,6R)-6-isopropoxy-3,6-dihydro-2H-pyran-2-yl)-3,5,7,9,11,15-hexamethylnonadeca-2,10,12,16,18-pentaen-8-ol (41)**

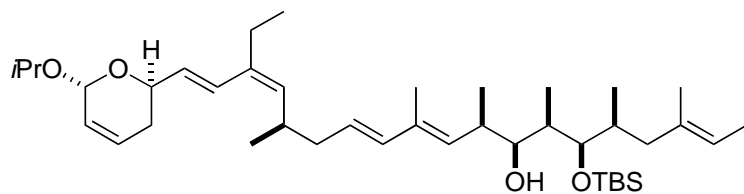

To a solution of alkyl iodide **21** (49.0 mg, 0.12 mmol, 1.30 equiv) in Et<sub>2</sub>O (1.3 mL) was added 9-MeO-9-BBN (1M in hexane) (330  $\mu$ L, 0.33 mmol, 3.42 equiv). The resulting solution was cooled to  $-78^{\circ}\text{C}$  and treated with *t*BuLi (1.5 M in pentane) (192  $\mu$ L, 0.29 mmol, 3.00 equiv). After 5 minutes THF (1.3 mL) was added and the solution allowed to return to RT; stirring was continued for 1 hour. Separately in another flask vinyl iodide **34** (50.0 mg, 0.096 mmol, 1.00 equiv) was taken up in DMF (1.3 mL) to which Pd(dppf)Cl<sub>2</sub>•CH<sub>2</sub>Cl<sub>2</sub> (4.0 mg, 0.005 mmol, 0.05 equiv), AsPh<sub>3</sub> (4.4 mg, 0.014, 0.15 equiv), Cs<sub>2</sub>CO<sub>3</sub> (125 mg, 0.384 mmol, 4.00 equiv) and H<sub>2</sub>O (41  $\mu$ L, 2.30 mmol, 24 equiv) were sequentially added. The alkyl boronate solution was transferred in the DMF solution and the resulting red-brown mixture stirred at RT for 20 hours. The reaction was diluted with water and extracted with Et<sub>2</sub>O (3x). The combined organic layers were washed with water (1x) and brine (1x), dried (MgSO<sub>4</sub>) and concentrated. Purification by chromatography on SiO<sub>2</sub> (pentane/Et<sub>2</sub>O 98:2) afforded **41** (30.0 mg, 0.046 mmol, 48%) as a pale yellow oil and a second fraction (41.4 mg) containing a mixture of product and a side compound that was directly used in the next step without further purifications.  $R_f = 0.71$  (hexane/EtOAc 8:2). Optical rotation  $[\alpha]^{22.2}_D (c\ 0.30, \text{CHCl}_3) = +50.5^{\circ}$ . <sup>1</sup>H-NMR (400 MHz, CDCl<sub>3</sub>)  $\delta$  6.59 (d,  $J = 15.7$  Hz, 1 H), 6.03-6.00 (m, 1 H), 5.99 (d,  $J = 15.7$  Hz, 1 H), 5.76-5.70 (m, 2 H), 5.53-5.46 (m, 1 H), 5.19-5.16 (m, 2 H), 5.13 (s, 1 H), 5.06 (d,  $J = 9.9$  Hz, 1 H), 4.53-4.48 (m, 1 H), 4.02 (sept.,  $J = 6.1$  Hz, 1 H), 3.61-3.59 (m, 1 H), 3.37-3.33 (m, 1 H), 2.71-2.63 (m, 1 H), 2.61-2.53 (m, 1 H), 2.22-2.01 (m, 7 H), 1.89-1.76 (m, 4 H), 1.72 (s, 3 H), 1.59-1.55 (m, 6 H), 1.25 (d,  $J = 6.1$  Hz, 3 H), 1.19 (d,  $J = 6.1$  Hz, 3 H), 1.04 (m, 6 H), 0.97 (d,  $J = 6.4$  Hz, 3 H), 0.91 (m, 9 H), 0.84 (d,  $J = 7.0$  Hz, 3 H), 0.74 (d,  $J = 6.7$  Hz, 3 H), 0.09 (s, 6 H). <sup>13</sup>C-NMR (100 MHz, CDCl<sub>3</sub>)  $\delta$  136.6, 136.2, 135.9, 134.9, 133.6, 133.4, 129.0, 128.9, 127.7, 126.6, 126.4, 120.4, 93.7, 80.0, 79.2, 70.1, 67.6, 44.4, 41.4, 38.7, 37.4, 35.7, 32.4, 31.3, 26.8, 26.6, 24.3, 22.6, 21.0, 18.8, 18.1, 16.0, 14.9, 13.9, 13.8, 13.3, 9.00,  $-2.9$ ,  $-3.6$ . HRMS-ESI calcd for C<sub>41</sub>H<sub>72</sub>O<sub>4</sub>SiNa:  $[\text{M} + \text{Na}]^+ 679.5098$ , found 679.5063. FTIR  $\nu$  3503w, 2963m, 2928m, 2858w, 1458w, 1381w, 1323w, 1254w, 1099w, 1030m, 1003m, 964w, 833w, 775s cm<sup>-1</sup>.



**(R)-6-((1E,3Z,5R,7E,9E,11R,13S,14R,15S,17E)-14-(tert-butyldimethylsilyloxy)-3,5,9,11,13,15,17-heptamethyl-12-oxononadeca-1,3,7,9,17-pentaenyl)-5,6-dihydro-2H-pyran-2-one (42)**

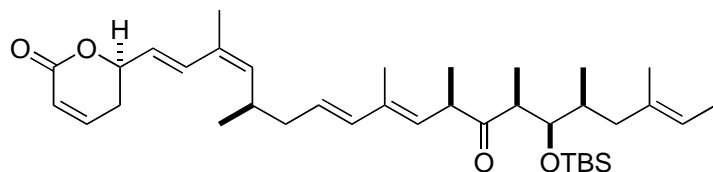

To a solution of **39** (6.8 mg, 0.011 mmol, 1.00 equiv) in a mixture acetone/water (3/1) (220  $\mu$ L), PPTS (1.3 mg, 0.005 mmol, 0.5 equiv) was added and the resulting solution stirred at

RT for 22 hours. The reaction was diluted with water, extracted with Et<sub>2</sub>O (3x) and the combined organic layer dried (MgSO<sub>4</sub>) and concentrated. Purification by chromatography on SiO<sub>2</sub> (pentane/Et<sub>2</sub>O 9:1  $\rightarrow$  7:3) afforded the corresponding lactol (6.3 mg, 0.010 mmol, 95%) as a pale yellow oil.  $R_f$  = 0.20 (pentane/Et<sub>2</sub>O 7:3). Optical rotation  $[\alpha]^{22.8}_D$  (c 0.10, CHCl<sub>3</sub>) = +53.1°. <sup>1</sup>H-NMR (300 MHz, CDCl<sub>3</sub>)  $\delta$  6.73 (d,  $J$  = 15.7 Hz, 1 H), 6.11-6.07 (m, 1 H), 6.02 (d,  $J$  = 15.5 Hz, 1 H), 5.85 (dd,  $J_1$  = 10.1 Hz,  $J_2$  = 0.8 Hz, 1 H), 5.73 (dd,  $J_1$  = 15.7 Hz,  $J_2$  = 6.5 Hz, 1 H), 5.53 (dt,  $J_1$  = 15.5 Hz,  $J_2$  = 7.3 Hz, 1 H), 5.48 (br. s, 1 H), 5.24 (d,  $J$  = 9.7 Hz, 1 H), 5.23-5.18 (m, 1 H), 5.10 (d,  $J$  = 9.9 Hz, 1 H), 4.61-4.56 (m, 1 H), 3.63-3.61 (m, 1 H), 3.42-3.39 (m, 1 H), 2.79-2.69 (m, 2 H), 2.66-2.56 (m, 1 H), 2.21-2.01 (m, 5 H), 1.91-1.86 (m, 1 H), 1.84 (s, 3 H), 1.82-1.78 (m, 3 H), 1.75 (s, 3 H), 1.59-1.57 (m, 6 H), 1.05 (d,  $J$  = 6.5 Hz, 3 H), 0.98 (d,  $J$  = 6.6 Hz, 3 H), 0.94 (s, 9 H), 0.87 (d,  $J$  = 7.0 Hz, 3 H), 0.76 (d,  $J$  = 6.6 Hz, 3 H), 0.11 (s, 3 H), 0.10 (s, 3 H). <sup>13</sup>C-NMR (75 MHz, CDCl<sub>3</sub>)  $\delta$  138.2, 136.5, 134.9, 133.6, 133.4, 130.2, 129.2, 129.1, 126.4, 126.3, 120.3, 89.7, 79.9, 79.1, 67.8, 44.3, 41.2, 38.6, 37.3, 35.6, 32.5, 31.2, 26.6, 21.0, 20.8, 18.8, 17.9, 15.9, 14.9, 13.8, 13.3, 9.0, -2.8, -3.6. HRMS-ESI calcd for C<sub>37</sub>H<sub>64</sub>O<sub>4</sub>SiNa: [M + Na]<sup>+</sup> 623.4472, found 623.4475. FTIR  $\nu$  3396w, 2959m, 2928m, 2859w, 1684w, 1457w, 1382w, 1253w, 1094w, 1033w, 964w, 835w, 772w, 680m cm<sup>-1</sup>.

To a solution of the previously obtained lactol (3.2 mg, 0.005 mmol, 1.00 equiv) in CH<sub>2</sub>Cl<sub>2</sub> (100  $\mu$ L) was added DMP (5.6 mg, 0.013 mmol, 1.00 equiv) and the resulting mixture stirred at RT for 4 hours. The mixture was directly loaded over a pipette column of silica and eluted with pentane/Et<sub>2</sub>O 9.5/0.5  $\rightarrow$  7/3. The mixture of lactol-ketone and lactone-ketone was concentrated and directly treated with MnO<sub>2</sub> (7.0 mg, 0.080 mmol, 15.0 equiv) in CH<sub>2</sub>Cl<sub>2</sub> (300  $\mu$ L) at RT for 14 hours. The mixture was filtered over Celite, washed with CH<sub>2</sub>Cl<sub>2</sub> and concentrated to afford  $\alpha,\beta$ -unsaturated lactone **42** (1.5 mg, 0.003 mmol, 47%) as a pale yellow oil, which was directly used in the next step without further purification.  $R_f$  = 0.19 (pentane/Et<sub>2</sub>O 7:3).

**(R)-6-((1E,3Z,5R,7E,9E,11R,13S,14R,15S,17E)-14-hydroxy-3,5,9,11,13,15,17-heptamethyl-12-oxononadeca-1,3,7,9,17-pentaenyl)-5,6-dihydro-2H-pyran-2-one (anguinomycin C) (1)**

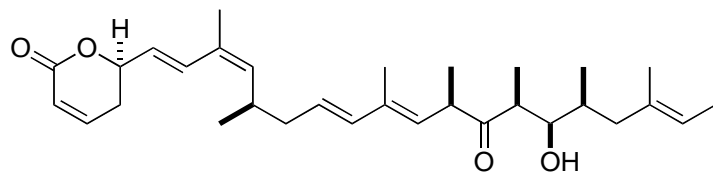

In a 10 ml plastic vial under Ar, a solution of  $\alpha,\beta$ -unsaturated lactone **42** (1.4 mg, 0.002 mmol, 1.00 equiv) in THF (300  $\mu$ L) was cooled to 0 °C and treated dropwise with a solution of HF-pyridine (120  $\mu$ L) and pyridine (60  $\mu$ L) in THF (200  $\mu$ L). After addition the resulting pale yellow solution was allowed to return to RT and stirred for 4.5 days. The reaction mixture was diluted in Et<sub>2</sub>O and transferred by canula in a saturated NaHCO<sub>3</sub> solution and extracted with Et<sub>2</sub>O (3x). The combined organic layers were washed with saturated NH<sub>4</sub>Cl (1x), dried (MgSO<sub>4</sub>) and concentrated. The crude mixture was directly purified by HPLC to afford anguinomycin C (**1**) (0.9 mg, 0.0019 mmol, 82%) as a colorless oil. Optical rotation  $[\alpha]^{23.1}_{\text{D}}$  (c 0.012, CHCl<sub>3</sub>) = -116.7°. Optical rotation  $[\alpha]^{22.5}_{\text{D}}$  (c 0.0064, MeOH) = -101.2°. <sup>1</sup>H-NMR (600 MHz, CDCl<sub>3</sub>)  $\delta$  6.93 (dt,  $J_1$  = 9.8 Hz,  $J_2$  = 4.3 Hz, 1 H), 6.76 (d,  $J$  = 15.6 Hz, 1 H), 6.09 (td,  $J_1$  = 9.7 Hz,  $J_2$  = 1.8 Hz, 1 H), 6.04 (d,  $J$  = 15.6 Hz, 1 H), 5.75 (dd,  $J_1$  = 15.6 Hz,  $J_2$  = 6.9 Hz, 1 H), 5.61 (dt,  $J_1$  = 15.5 Hz,  $J_2$  = 7.4 Hz, 1 H), 5.30 (d,  $J$  = 9.8 Hz, 1 H), 5.22 (qd,  $J_1$  = 6.6 Hz,  $J_2$  = 1.1 Hz, 1 H), 5.15 (d,  $J$  = 10.1 Hz, 1 H), 5.01 (dt,  $J_1$  = 7.3 Hz,  $J_2$  = 7.1 Hz, 1 H), 3.69 (dq,  $J_1$  = 10.1 Hz,  $J_2$  = 6.7 Hz, 1 H), 3.59 (ddd,  $J_1$  = 5.5 Hz,  $J_2$  = 5.5 Hz,  $J_3$  = 4.0 Hz, 1 H), 2.88 (qd,  $J_1$  = 7.1 Hz,  $J_2$  = 5.7 Hz, 1 H), 2.74-2.67 (m, 1 H), 2.51-2.49 (m, 2 H), 2.40 (d,  $J$  = 4.0 Hz, 1 H), 2.15-2.06 (m, 2 H), 2.02 (dd,  $J_1$  = 13.0 Hz,  $J_2$  = 6.1 Hz, 1 H), 1.85 (d,  $J$  = 1.1 Hz, 3 H), 1.84 (d,  $J$  = 1.1 Hz, 3 H), 1.74 (dd,  $J_1$  = 13.0 Hz,  $J_2$  = 8.8 Hz, 1 H), 1.69-1.64 (m, 1 H), 1.60 (dd,  $J_1$  = 6.8 Hz,  $J_2$  = 0.5 Hz, 3 H), 1.58 (s, 3 H), 1.17 (d,  $J$  = 7.1 Hz, 3 H), 1.16 (d,  $J$  = 6.6 Hz, 3 H), 0.99 (d,  $J$  = 6.7 Hz, 3 H), 0.80 (d,  $J$  = 6.6 Hz, 3 H). <sup>13</sup>C-NMR (150 MHz, CDCl<sub>3</sub>)  $\delta$  215.4, 163.7, 144.3, 138.7, 135.8, 135.1, 133.6, 130.4, 129.1, 128.1, 127.3, 125.0, 121.3, 120.1, 78.3, 74.0, 46.1, 45.3, 43.7, 40.4, 32.8, 31.9, 29.7, 20.3, 20.0, 15.8, 14.9, 13.8, 13.0, 12.7, 11.8. HRMS-ESI calcd for C<sub>31</sub>H<sub>46</sub>O<sub>4</sub>Na: [M + Na]<sup>+</sup> 505.3294, found 505.3281. FTIR  $\nu$  3440m, 2963m, 2927m, 2856w, 1709m, 1454w, 1381w, 1248w, 891m cm<sup>-1</sup>. UV spectrum  $\lambda_{\text{max}}$  = 241 nm in MeOH. Analytical HPLC  $R_t$  = 32.35 minutes (C<sub>18</sub>, 60%-100% MeOH in 50 minutes). Semi-preparative HPLC  $R_t$  = 38.82 minutes (C<sub>18</sub>, 60%-80% MeOH in 50 minutes).

**(R)-6-((1E,3Z,5R,7E,9E,11R,13S,14R,15S,17E)-3-ethyl-14-hydroxy-5,9,11,13,15,17-hexamethyl-12-oxononadeca-1,3,7,9,17-pentaenyl)-5,6-dihydro-2H-pyran-2-one (anguinomycin D) (2)**

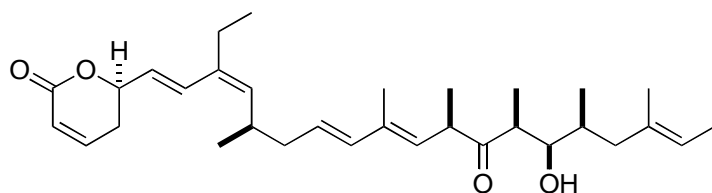

To a solution of **41** (27.0 mg, 0.041 mmol, 1.00 equiv) in a mixture acetone/water (5/1) (830  $\mu$ L) was added PPTS (6.0 mg, 0.024 mmol, 0.4 equiv) and the resulting solution

stirred at RT for 43 hours. The reaction was transferred in a saturated  $\text{NaHCO}_3$  solution, extracted with  $\text{Et}_2\text{O}$  (3x) and the combined organic layer washed with brine (1x), dried ( $\text{MgSO}_4$ ) and concentrated. Purification by chromatography on  $\text{SiO}_2$  (pentane/ $\text{Et}_2\text{O}$  9:1  $\rightarrow$  1:1) afforded the lactol (23.0 mg, 0.037 mmol, 91%).

To a solution of lactol (1.30 mg, 0.002 mmol, 1.00 equiv) in  $\text{CH}_2\text{Cl}_2$  (0.5 mL), 4Å MS (50 mg), PCC (3.00 mg, 0.013 mmol, 6.00 equiv) and glacial acetic acid (12  $\mu$ L, 0.21 mmol, 100 equiv) were sequentially added and the resulting mixture stirred at RT for 1.5 hours. The mixture was directly loaded over a column of silicagel and eluted with hexane/ $\text{AcOEt}$  8.5/1.5  $\rightarrow$  1/1 to afford the ketolactone intermediate which was directly used in the last step.

In a 10 ml plastic tube a solution of the previous obtained ketolactone in THF (0.5 mL) was cooled to 0 °C. Pyridine (100  $\mu$ L) and  $\text{HF}\cdot\text{pyridine}$  (100  $\mu$ L) were sequentially added and the tube sealed. After 5 minutes the solution was allowed to return to RT and stirred for 4.5 days. The solution was cooled to 0 °C and silicagel (100 mg) was added. After 5 minutes, the mixture was loaded on a pipette column of silicagel and eluted with hexane/ $\text{EtOAc}$  8:2  $\rightarrow$  1:1 affording anguinomycin D (**2**) (0.62 mg, 0.0013 mmol, 60%) as a colorless oil. An analytical sample of anguinomycin D was purified by HPLC.  $R_f$  = 0.17 (hexane/ $\text{EtOAc}$  6:4). Optical rotation  $[\alpha]^{22.7}_D$  ( $c$  0.014, MeOH) =  $-112.0^\circ$ .  $^1\text{H-NMR}$  (800 MHz,  $\text{CDCl}_3$ )  $\delta$  6.90 (dddd,  $J_1 = 9.7$  Hz,  $J_2 = 4.9$  Hz,  $J_3 = 3.6$  Hz,  $J_4 = 0.8$  Hz, 1 H), 6.63 (d,  $J = 15.8$  Hz, 1 H), 6.06 (dt,  $J_1 = 9.8$  Hz,  $J_2 = 1.8$  Hz, 1 H), 6.01 (d,  $J = 15.6$  Hz, 1 H), 5.76 (dd,  $J_1 = 15.7$  Hz,  $J_2 = 6.9$  Hz, 1 H), 5.58 (dt,  $J_1 = 15.5$  Hz,  $J_2 = 7.3$  Hz, 1 H), 5.25 (d,  $J = 9.8$  Hz, 1 H), 5.19 (qd,  $J_1 = 6.8$  Hz,  $J_2 = 1.2$  Hz, 1 H), 5.11 (d,  $J = 10.1$  Hz, 1 H), 4.99-4.96 (m, 1 H) or 4.98 (dtd,  $J_1 = 6.9$  Hz,  $J_2 = 7.6$  Hz,  $J_3 = 0.8$  Hz, 1 H), 3.66 (dq,  $J_1 = 10.1$  Hz,  $J_2 = 6.7$  Hz, 1 H), 3.55 (t,  $J = 5.6$  Hz, 1 H), 2.87 (dt,  $J_1 = 5.7$  Hz,  $J_2 = 7.1$  Hz, 1 H), 2.68-2.64 (m, 1 H), 2.48-2.46 (m, 2 H), 2.22-2.15 (m, 2 H), 2.08 (t,  $J = 7.0$  Hz, 2 H), 1.98 (dd,  $J_1 = 13.1$  Hz,  $J_2 = 6.2$  Hz, 1 H), 1.82 (d,  $J = 1.2$  Hz, 3 H), 1.70 (dd,  $J_1 = 13.1$  Hz,  $J_2 = 8.6$  Hz, 1 H), 1.65-1.61 (m, 1 H), 1.57 (dd,  $J_1 = 6.7$  Hz,  $J_2 = 0.8$  Hz, 3 H), 1.55 (s, 3 H), 1.14 (d,  $J = 7.3$  Hz, 3 H), 1.13 (d,  $J = 7.1$  Hz, 3 H), 1.04 (t,  $J = 7.5$  Hz, 3 H), 0.96 (d,  $J = 6.6$  Hz, 3 H), 0.77 (d,  $J = 6.6$  Hz, 3 H).  $^{13}\text{C-NMR}$  (150 MHz,  $\text{CDCl}_3$ )  $\delta$  215.8, 164.1, 144.7, 137.3, 136.2, 135.4, 135.3, 134.0, 130.0, 128.4, 127.7, 124.8,

121.7, 120.5, 79.9, 74.4, 46.5, 45.6, 44.1, 40.8, 33.2, 32.2, 30.1, 26.4, 20.8, 16.3, 15.3, 14.2, 13.5, 13.4, 13.1, 12.2. HRMS-ESI calcd for  $C_{32}H_{48}O_4Na$ :  $[M + Na]^+$  519.3450; found 519.3429. UV spectrum  $\lambda_{max}$  = 242 nm in MeOH. Analytical HPLC  $R_t$  = 32.87 minutes ( $C_{18}$ , 60%  $\rightarrow$  100% MeOH in 50 minutes).

The same three last steps procedure (i. PPTS, acetone/water; ii. PCC, 4 Å MS, AcOH,  $CH_2Cl_2$ ; iii. HF•pyridine, pyridine) was applied using the mixed fraction obtained from the  $sp^3$ - $sp^2$  Suzuki Cross-Coupling for the synthesis of product **41**. In addition to anguinomycin D (**2**), the following compounds were isolated:

**2Z,5R,6E,8Z,10R,12E,14E,16R,18S,19R,20S,22E)-8-ethyl-5,19-dihydroxy-10,14,16,18,20,22-hexamethyl-17-oxotetracos-2,6,8,12,14,22-hexaenal (44)**

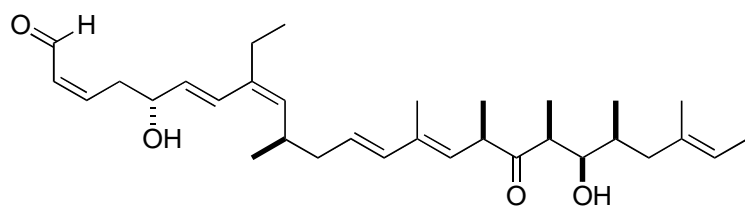

$R_f$  = 0.11 (hexane/EtOAc 7:3).  $^1H$ -NMR (400 MHz,  $CDCl_3$ )  $\delta$  9.56 (d,  $J$  = 7.5 Hz, 1 H), 6.91 (dt,  $J_1$  = 15.8 Hz,  $J_2$  = 7.5 Hz, 1 H), 6.56 (d,  $J$  = 15.8 Hz, 1 H), 6.23 (ddt,  $J_1$  = 15.8 Hz,  $J_2$  = 7.9 Hz,  $J_3$  = 1.3 Hz, 1 H), 6.04 (d,  $J$  = 15.3 Hz, 1 H), 5.73 (dd,  $J_1$  = 15.3 Hz,  $J_2$  = 6.6 Hz, 1 H), 5.64-5.59 (m, 1 H), 5.24-5.20 (m, 2 H), 5.16 (d,  $J$  = 10.1 Hz, 1 H), 4.41 (q,  $J$  = 6.1 Hz, 1 H), 3.70-3.65 (m, 1 H), 3.60 (t,  $J$  = 5.3 Hz, 1 H), 2.91-2.86 (m, 1 H), 2.70-2.66 (m, 1 H), 2.65-2.63 (m, 1 H), 2.22-2.18 (m, 1 H), 2.11 (t,  $J$  = 6.6 Hz, 1 H), 2.01 (dd,  $J_1$  = 13.2 Hz,  $J_2$  = 6.1 Hz, 1 H), 1.84 (d,  $J$  = 1.3 Hz, 3 H), 1.76-1.73 (m, 1 H), 1.68-1.64 (m, 1 H), 1.61 (d,  $J$  = 6.6 Hz, 3 H), 1.58-1.57 (m, 3 H), 1.17 (d,  $J$  = 7.0 Hz, 3 H), 1.16 (d,  $J$  = 6.6 Hz, 3 H), 1.07 (t,  $J$  = 7.5 Hz, 3 H), 1.00 (d,  $J$  = 7.0 Hz, 3 H), 0.91 (t,  $J$  = 7.0 Hz, 3 H), 0.80 (d,  $J$  = 6.6 Hz, 3 H). HRMS-ESI calcd for  $C_{32}H_{50}O_4Na$ :  $[M + Na]^+$  521.3607; found 521.3607. Analytical HPLC  $R_t$  = 32.37 minutes ( $C_{18}$ , 60%  $\rightarrow$  100% MeOH in 50 minutes).  $\lambda_{max}$  = 239 nm.

**(R)-6-((1E,3Z)-3-ethyl-5-methylhexa-1,3-dienyl)-5,6-dihydro-2H-pyran-2-one (4)**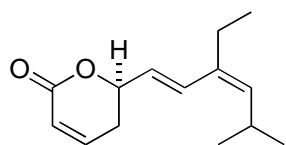

$R_f = 0.44$  (hexane/EtOAc 7:3).  $^1\text{H-NMR}$  (400 MHz,  $\text{CDCl}_3$ )  $\delta$  6.93 (dt,  $J_1 = 9.6$  Hz,  $J_2 = 4.1$  Hz, 1 H), 6.70 (d,  $J = 15.8$  Hz, 1 H), 6.09 (dt,  $J_1 = 9.8$  Hz,  $J_2 = 1.9$  Hz, 1 H), 5.78 (dd,  $J_1 = 15.8$  Hz,  $J_2 = 6.9$  Hz, 1 H), 5.29 (d,  $J = 9.6$  Hz, 1 H), 5.05-4.99 (m, 1 H), 2.81-2.72 (m, 1 H), 2.52-2.48 (m, 2 H), 2.19 (q,  $J = 7.4$  Hz, 2 H), 1.07 (t,  $J = 7.4$  Hz, 3 H), 1.00 (d,  $J = 1.5$  Hz, 3 H), 0.98 (d,  $J = 1.4$  Hz, 3 H). HRMS-ESI calcd for  $\text{C}_{14}\text{H}_{20}\text{O}_2$ :  $[\text{M}]^+$  221.1542; found 221.1548. Analytical HPLC  $R_t = 38.55$  minutes ( $\text{C}_{18}$ , 30%  $\rightarrow$  80% MeOH in 50 minutes),  $\lambda_{\text{max}} = 239$  nm.

**3. Synthesis of Anguinomycin/Terpene Hybrid****(E)-4,8-dimethylnona-3,7-dien-1-yne (46)**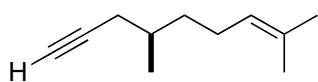

To a cooled ( $0^\circ\text{C}$ ) solution of  $\text{CBr}_4$  (292 mg, 0.88 mmol, 2.20 equiv) in  $\text{CH}_2\text{Cl}_2$  (500  $\mu\text{L}$ ),  $\text{PPh}_3$  (462 mg, 1.76 mmol, 4.40 equiv) was added in portion over 2 minutes. After 5 minutes stirring at  $0^\circ\text{C}$  a solution of citronelal (62 mg, 0.40 mmol, 1.00 equiv) and 2,6-lutidine (61  $\mu\text{L}$ , 0.88 mmol, 2.20 equiv) in  $\text{CH}_2\text{Cl}_2$  (500  $\mu\text{L}$ ) was added via syringe over 10 minutes. The resulting brown mixture was stirred at  $0^\circ\text{C}$  for 2 hours. The mixture was precipitated with pentane and the supernatant was filtered over Celite. The precipitate was dissolved in the minimum of  $\text{CH}_2\text{Cl}_2$  and precipitated with pentane. The supernatant was filtered over Celite. This process was repeated 5 times. The combined supernatants were concentrated and purified by flash chromatography on  $\text{SiO}_2$  (hexane/EtOAc 95:5) to afford the title compound (116 mg, 0.37 mmol, 92%) as a colorless oil.  $R_f = 0.86$  (hexane/EtOAc 9:1).  $^1\text{H-NMR}$  (400 MHz,  $\text{CDCl}_3$ )  $\delta$  7.11 (d,  $J = 10.5$  Hz, 1 H), 5.87-5.83 (m, 1 H), 5.10-5.05 (m, 1 H), 2.17-2.06 (m, 4 H), 1.75 (d,  $J = 1.4$  Hz, 3 H), 1.69 (d,  $J = 1.0$  Hz, 3 H), 1.61 (s, 3 H).  $^{13}\text{C-NMR}$  (75 MHz,  $\text{CDCl}_3$ )  $\delta$  144.9, 133.6, 132.2, 123.4, 121.8, 88.9, 40.0, 29.7, 26.3, 25.6, 17.78. FTIR  $\nu$  2967m, 2924s, 2855m, 1636w, 1443m, 1381m  $\text{cm}^{-1}$ .

To a cooled ( $-78^\circ\text{C}$ ) solution of (*E*)-1,1-dibromo-4,8-dimethylnona-1,3,7-triene (112 mg, 0.37 mmol, 1.00 equiv) in THF (600  $\mu\text{L}$ ) under Ar was added *n*BuLi (1.6 M in hexanes) (552  $\mu\text{L}$ , 0.88 mmol, 2.40 equiv). The reaction was stirred during 10 minutes at  $-78^\circ\text{C}$  and allowed to reach RT over 1 hour. The solution was further stirred at RT for 1 hour. A saturated solution of  $\text{NH}_4\text{Cl}$  (500  $\mu\text{L}$ ) was added and the mixture stirred at RT for 15 minutes. The mixture was diluted with  $\text{H}_2\text{O}$  (2 mL) and extracted with  $\text{Et}_2\text{O}$  (3x). The combined organic phase was washed with brine (1x), dried ( $\text{Na}_2\text{SO}_4$ ) and concentrated to afford alkyne (**46**), which was directly used in the next step without further purification.

**(1E,3E)-1-iodo-4,8-dimethylnona-1,3,7-triene (47)**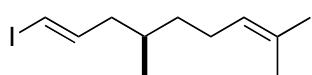

To a cooled ( $-20\text{ }^{\circ}\text{C}$ ) solution of the previously obtained terminal alkyne in THF (1.5 mL) under Ar was added  $\text{Cp}_2\text{ZrHCl}$  (105 mg, 0.41 mmol, 1.10 equiv) in one portion. The reaction flask was covered with an aluminium foil and the suspension stirred at  $-20\text{ }^{\circ}\text{C}$  for 30 minutes. The resulting clear solution was cooled to  $-78\text{ }^{\circ}\text{C}$  followed by addition of  $\text{I}_2$  (36 mg, 0.28 mmol, 1.30 equiv) in THF (1.0 mL). The mixture was stirred at  $-78\text{ }^{\circ}\text{C}$  for 30 minutes and then allowed to return to RT over 1 hour. The reaction was quenched by addition of HCl (1 M) and extracted with  $\text{Et}_2\text{O}$  (3x). The combined organic phase was washed with saturated  $\text{Na}_2\text{S}_2\text{O}_3$  (1x), saturated  $\text{NaHCO}_3$  (1x), brine (1x), dried ( $\text{Na}_2\text{SO}_3$ ) and concentrated. The residue was purified by flash chromatography on  $\text{SiO}_2$  (pentane/ $\text{Et}_2\text{O}$  100:0  $\rightarrow$  98:2) to give the iodoolefin **47** (88 mg, 0.32 mmol, 87% over 2 steps) as a colorless oil.  $R_f = 0.46$  (pentane/ $\text{Et}_2\text{O}$  9:1).  $^1\text{H-NMR}$  (400 MHz,  $\text{CDCl}_3$ )  $\delta$  6.48 (dt,  $J_1 = 14.4\text{ Hz}$ ,  $J_2 = 7.7\text{ Hz}$ , 1 H), 5.96 (dt,  $J_1 = 14.4\text{ Hz}$ ,  $J_2 = 1.1\text{ Hz}$ , 1 H), 5.11-5.05 (m, 1 H), 2.10-1.86 (m, 4 H), 1.68 (d,  $J = 1.2\text{ Hz}$ , 3 H), 1.60 (s, 3 H), 1.57-1.49 (m, 1 H), 1.28 (m, 1 H), 1.19-1.10 (m, 1 H), 0.88 (d,  $J = 6.7\text{ Hz}$ , 3 H).  $^{13}\text{C-NMR}$  (75 MHz,  $\text{CDCl}_3$ )  $\delta$  145.5, 124.5, 75.0, 43.4, 36.4, 32.1, 25.5, 25.7, 19.3, 17.7. FTIR  $\nu$  2963m, 2913s, 2870m, 2851m, 1605w, 1454m, 1377m, 1188w, 949s  $\text{cm}^{-1}$ .

**(R)-6-((R,1E,3Z,7E,9E)-3-ethyl-5,10,14-trimethylpentadeca-1,3,7,9,13-pentaenyl)-5,6-dihydro-2H-pyran-2-one (3)**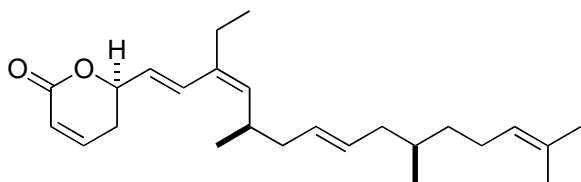

To a solution of alkyl iodine (**21**) (5.00 mg, 0.013 mmol, 1.00 equiv) in  $\text{Et}_2\text{O}$  (150  $\mu\text{L}$ ) under Ar, 9-MeO-9-BBN (1 M in hexane) (44  $\mu\text{L}$ , 0.044 mmol, 3.40 equiv) was added. The resulting solution was cooled to  $-78\text{ }^{\circ}\text{C}$  and treated with  $t\text{BuLi}$  (1.5 M in pentane) (26  $\mu\text{L}$ , 0.038 mmol, 3.00 equiv). After 5 minutes THF (150  $\mu\text{L}$ ) was added and the solution allowed to return to RT. Stirring was continued for 1 hour. Separately in another flask the iodoolefin **47** (7.00 mg, 0.026 mmol, 2.00 equiv) was taken up in DMF (150  $\mu\text{L}$ ) to which  $\text{Pd}(\text{dppf})\text{Cl}_2 \cdot \text{CH}_2\text{Cl}_2$  (1.10 mg, 0.001 mmol, 0.10 equiv),  $\text{AsPh}_3$  (1.00 mg, 0.003, 0.25 equiv),  $\text{Cs}_2\text{CO}_3$  (17.0 mg, 0.051 mmol, 4.00 equiv) and  $\text{H}_2\text{O}$  (6  $\mu\text{L}$ , 0.307 mmol, 24 equiv) were sequentially added. The alkyl boronate solution was transferred in the DMF solution and the resulting red-brown mixture stirred at RT overnight. The reaction was diluted with water and extracted with  $\text{Et}_2\text{O}$  (3x). The combined organic layers were washed with water (1x) and brine (1x), dried ( $\text{Na}_2\text{SO}_4$ ) and concentrated. Purification by chromatography on  $\text{SiO}_2$  (pentane/ $\text{Et}_2\text{O}$  100:0  $\rightarrow$  98:2) afforded the coupled product (4.20 mg, 0.011 mmol, 74%) as a pale yellow oil.

To a solution of the previously obtained coupled product (3.90 mg, 0.01 mmol, 1.00 equiv) in a mixture of acetone/water (3/1) (200  $\mu$ L) was added PPTS (2.4 mg, 0.01 mmol, 1.00 equiv). The reaction was stirred at RT for 4 hours, then quenched with water and extracted with Et<sub>2</sub>O (3x). The combined organic layers were dried (MgSO<sub>4</sub>) and concentrated to afford the crude lactol. The residue was dissolved in CH<sub>2</sub>Cl<sub>2</sub> (1/0.025) (200  $\mu$ L) with 4 Å molecular sieves (50 mg), treated with PCC (6.1 mg, 0.028 mmol, 3.00 equiv) and the suspension was stirred for 3 hours. The mixture was diluted with CH<sub>2</sub>Cl<sub>2</sub> and filtered through Celite, washed with water (1x) and extracted with CH<sub>2</sub>Cl<sub>2</sub>. The organic layer was dried (Na<sub>2</sub>SO<sub>4</sub>) and concentrated. The residue was purified by chromatography on SiO<sub>2</sub> (pentane/Et<sub>2</sub>O 96:4) to give the  $\alpha,\beta$ -unsaturated lactone (**3**) (1.84 mg, 0.005 mmol, 46%) as a colorless oil.  $R_f$  = 0.38 (pentane/Et<sub>2</sub>O 9:1). <sup>1</sup>H-NMR (800 MHz, CDCl<sub>3</sub>)  $\delta$  6.90 (ddd,  $J_1$  = 10.5 Hz,  $J_2$  = 4.4 Hz,  $J_3$  = 3.9 Hz, 1 H), 6.64 (d,  $J$  = 15.7 Hz, 1 H), 6.07 (ddd,  $J_1$  = 9.9 Hz,  $J_2$  = 2.1 Hz,  $J_3$  = 1.6 Hz, 1 H), 5.76 (dd,  $J_1$  = 15.9 Hz,  $J_2$  = 6.8 Hz, 1 H), 5.38-5.34 (m, 1H), 5.32-5.28 (m, 1 H), 5.25 (d,  $J$  = 9.9 Hz, 1 H), 5.10-5.07 (m, 1 H), 5.01-4.98 (m, 1 H), 2.64-2.59 (m, 1 H), 2.48-2.46 (m, 2 H), 2.21-2.14 (m, 2 H), 2.01-1.97 (m, 4 H), 1.95-1.91 (m, 1 H), 1.81-1.79 (m, 1 H), 1.68 (s, 3 H), 1.60 (s, 3 H), 1.47-1.41 (m, 1 H), 1.29-1.34 (m, 1 H), 1.08-1.13 (m, 1 H), 1.04 (t,  $J$  = 7.3 Hz, 3 H), 0.95 (d,  $J$  = 6.8 Hz, 3 H), 0.84 (d,  $J$  = 6.8 Hz, 3 H). <sup>13</sup>C-NMR (200 MHz, CDCl<sub>3</sub>)  $\delta$  164.2, 144.8, 137.7, 134.8, 131.1, 130.7, 130.0, 129.2, 125.0, 124.6, 121.7, 79.0, 40.7, 40.1, 36.7, 32.8, 32.1, 30.1, 26.3, 25.8, 25.7, 20.8, 19.4, 17.7, 13.4. FTIR  $\nu$  2963 $m$ , 2916 $m$ , 2870 $m$ , 2361 $m$ , 2338 $w$ , 1732 $s$ , 1454 $w$ , 1381 $m$ , 1242 $s$ , 1053 $w$ , 1022 $w$ , 964 $m$ , 814 $w$  cm<sup>-1</sup>. HRMS-ESI-TOF calcd for C<sub>25</sub>H<sub>38</sub>O<sub>2</sub>: [M + H]<sup>+</sup> 371.2945; found 371.2950.

#### 4. X-ray Cristallography

**(2*S*,3*R*,4*S*,*E*)-3-hydroxy-*N*-methoxy-*N*,2,4,6-tetramethyloct-6-enamide (27) (CCDC674800)**

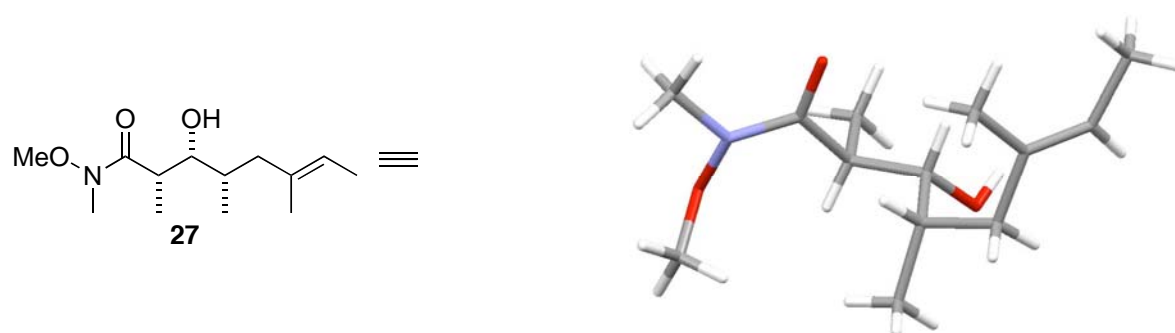

**(2*E*,4*R*,5*S*,6*R*,7*R*,8*S*,10*E*)-7-(*tert*-butyldimethylsilyloxy)-5-hydroxy-2,4,6,8,10-pentamethyldodeca-2,10-dienal (33) (CCDC674799)**

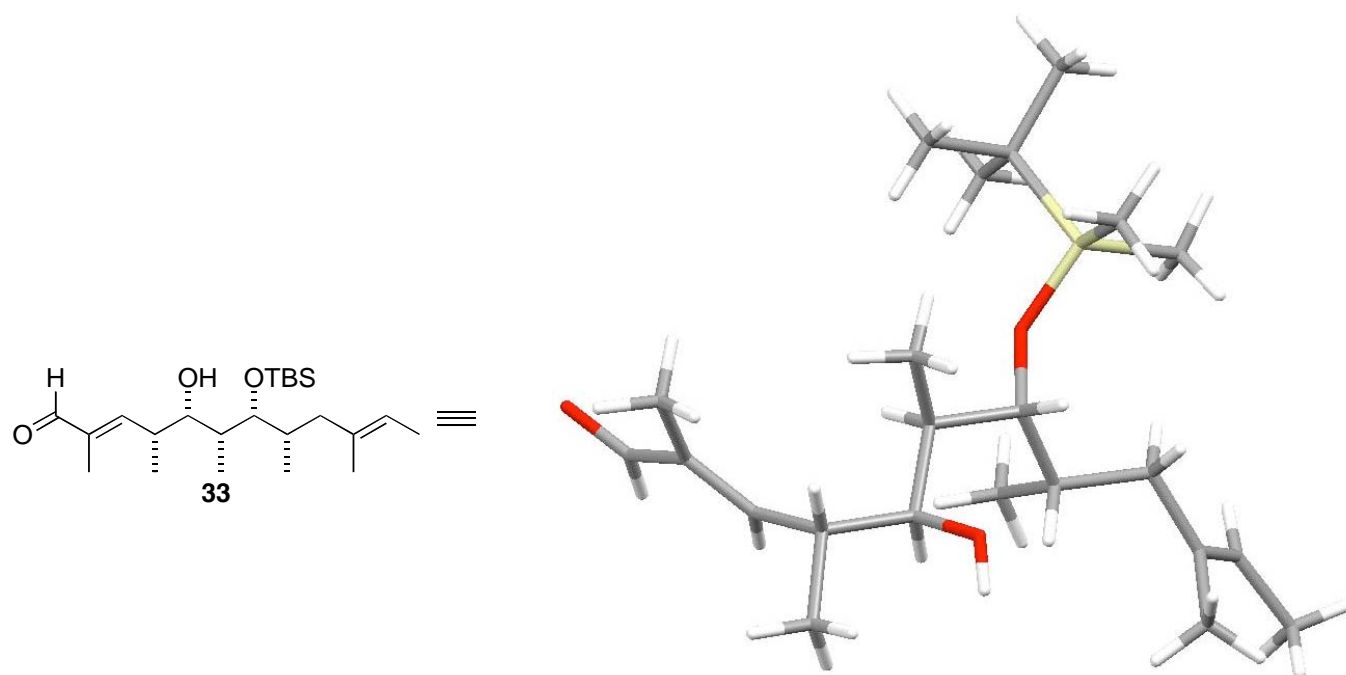



## 5. Biological Evaluation: Cell Culture Techniques, Antibodies and Indirect Immunofluorescence

HeLa cells were cultured at 37 °C in Dulbecco's modified eagle's medium (DMEM), supplemented with 10% fetal calf serum, 100 units/ml penicillin and 100 µg/ml streptomycin. For studying the inhibition of CRM1-mediated nuclear export, HeLa cells were grown on coverslips for 24 h to about 75% confluency. Cells were then incubated with different concentrations of LMB (LC laboratories, USA) or anguinomycins C or D for 90 min at 37 °C. For detection of Rio2, cells were fixed in 4% paraformaldehyde for 20 min and permeabilized for 5 minutes in 1 x detergent (0.1% Triton-X, 0.02% SDS in 1xPBS). Incubation with  $\alpha$ -Rio2 antibody (polyclonal antibody, raised against recombinant full-length human Rio2 in rabbit, affinity-purified) and fluorescently labeled secondary antibody (a-rabbit, Alexa 488-labeled, Invitrogen). Pictures were acquired using a Leica TCS NT1 laser-scanning confocal microscope.

## 6. Modeling

LMB was modeled covalently bound to cysteine 528 of the CRM1-SNUPN structure from Dong *et al.* (PDB code 3GB8).<sup>2</sup> The structure of the protein, including the coordinates of the covalently modified cysteine 528, was kept rigid. Only the inhibitor and the sulfur atom of modified cysteine 528 were allowed to move. The program Coot<sup>3</sup> was used in the modeling. The program Sketcher from the CCP4 suite<sup>4</sup> was used to generate coordinates and bond restraints for the covalently modified cysteine 528. Initial inhibitor conformations were minimized using Phenix<sup>5</sup> to remove clashes with the protein. Then the coordinates were subjected to an energy minimization using PLOP<sup>6</sup> to generate the final LMB

---

<sup>2</sup> Dong, X.; Biswas, A.; Suel, K. E.; Jackson, L. K.; Martinez, R.; Gu, H.; Chook, Y. M. *Nature* **2009**, 458, 1136-1141.

<sup>3</sup> Emsley, P.; Cowtan, K. *Acta Crystallogr D Biol Crystallogr* **2004**, 60, 2126-2132.

<sup>4</sup> Collaborative Computational Project, N. *Acta Crystallogr D Biol Crystallogr* **1994**, 50, 760-763.

<sup>5</sup> Adams, P. D.; Grosse-Kunstleve, R.W.; Hung, L.W.; Ioerger, T.R.; McCoy, A.J.; Moriarty, N.W.; Read, R.J.; Sacchettini, J.C.; Sauter, N.K.; Terwilliger, T.C. *Acta Crystallogr D Biol Crystallogr* **2002**, 58, 1948-1954.

<sup>6</sup> Kalyanaraman, C.; Bernacki, K.; Jacobson, M.P. *Biochemistry* **2005**, 44, 2059-2071.

model. For the derivatives, we used the LMB conformation as a starting point and subjected to them also to an energy minimization. PyMOL<sup>7</sup> was used to make the molecular pictures.

### Supplementary figure

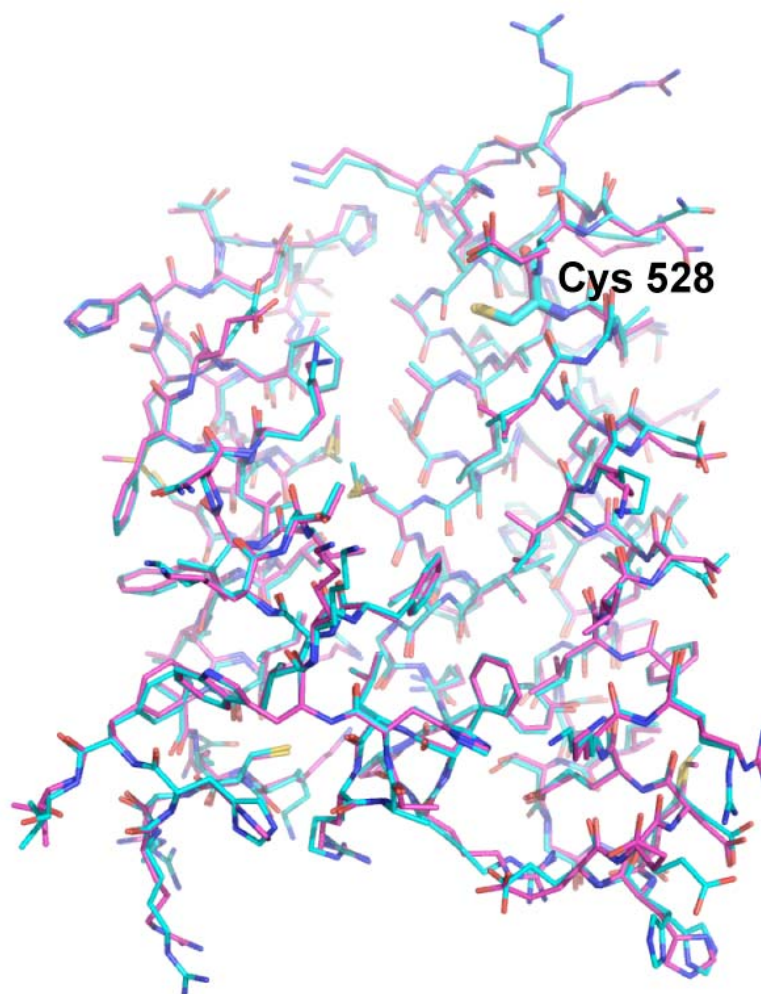

Figure S1: Superposition of two CRM1 structures,<sup>2,8</sup> focusing on the nuclear export signal (NES) binding sites. The structures are almost identical in this region with a RMSD of 0.31 Å for residues 490-600.

---

<sup>7</sup> DeLano, W.L.; *The PyMOL Molecular Graphics System*, DeLano Scientific, Palo Alto, CA, USA, **2002**.

<sup>8</sup> Monecke, T.; Guttler, T.; Neumann, P.; Dickmanns, A.; Gorlich, D.; Ficner, R. *Science* **2009**, 324, 1087-1091.

## 7. Spectra

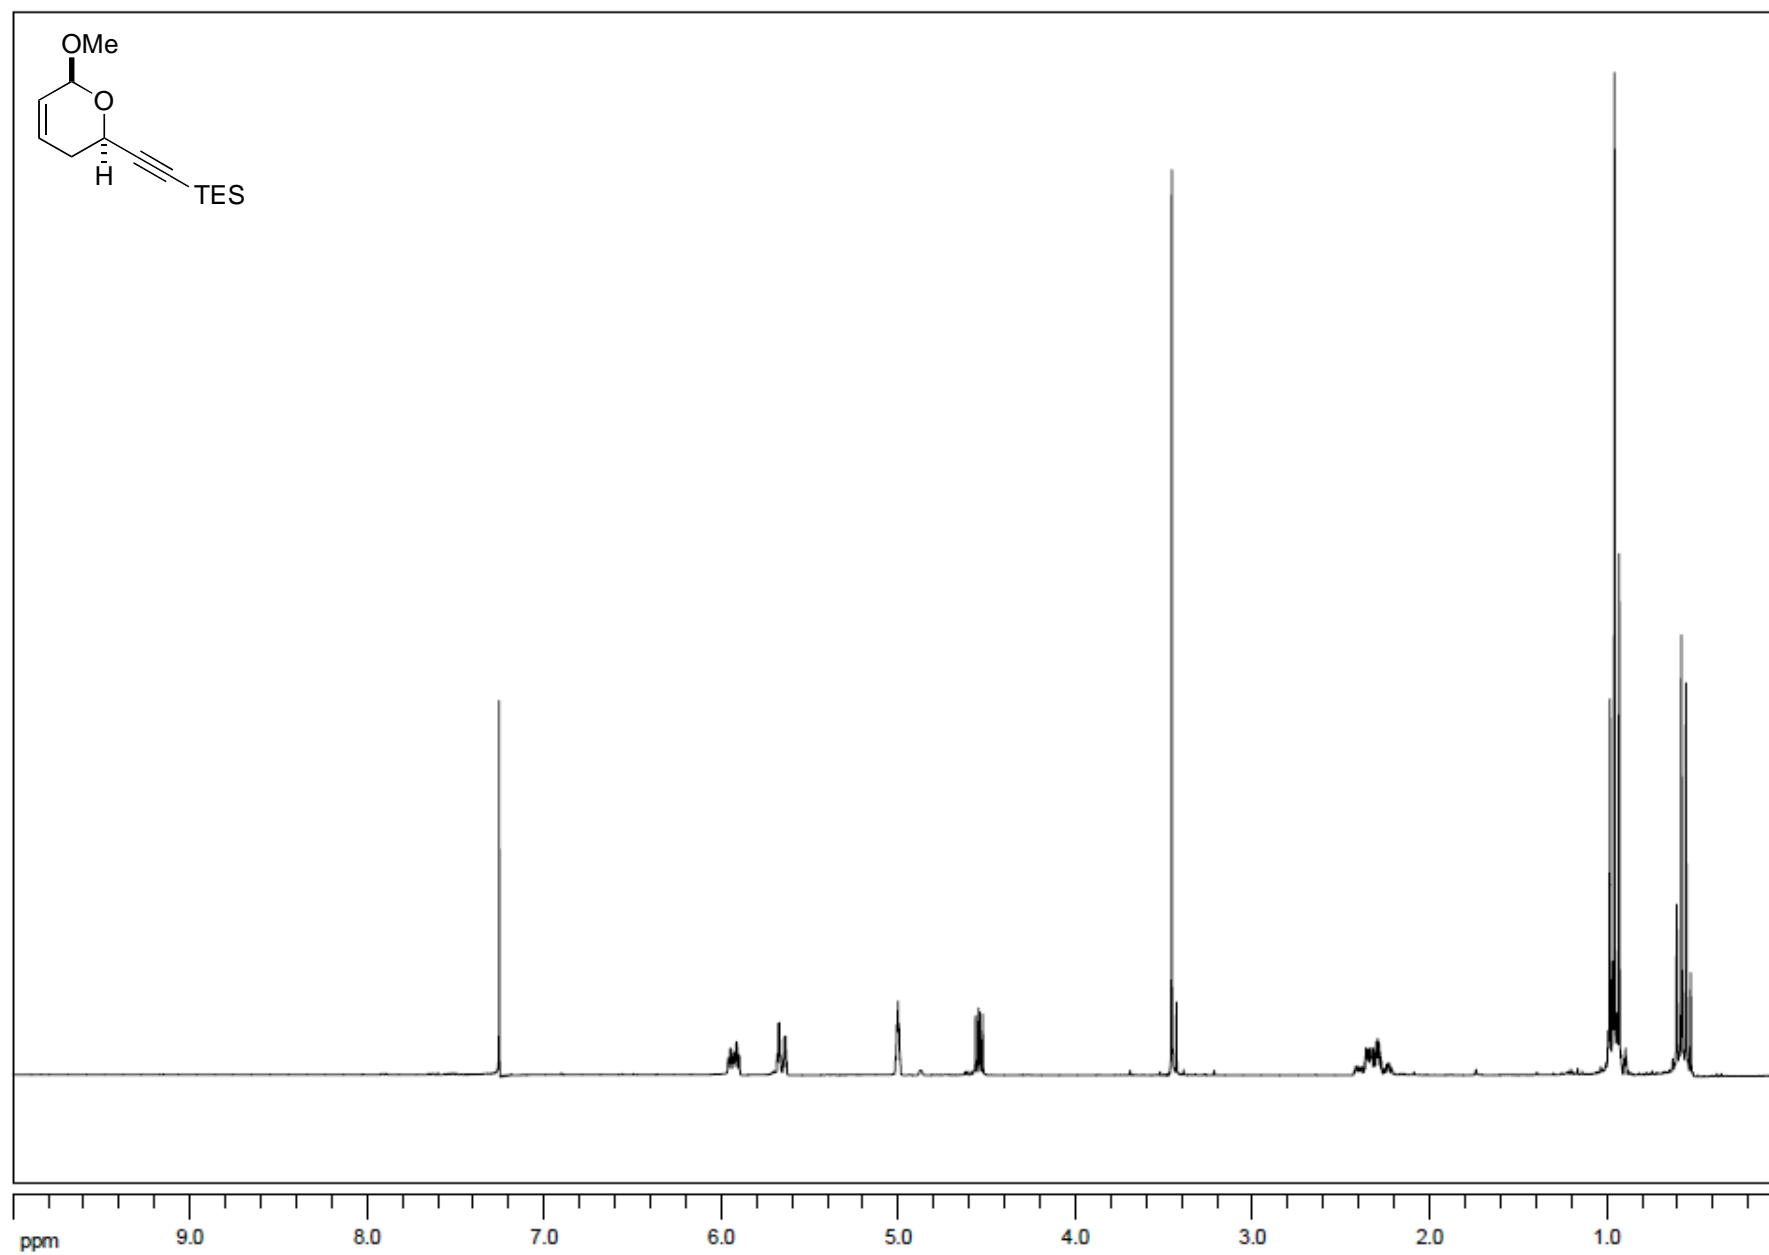

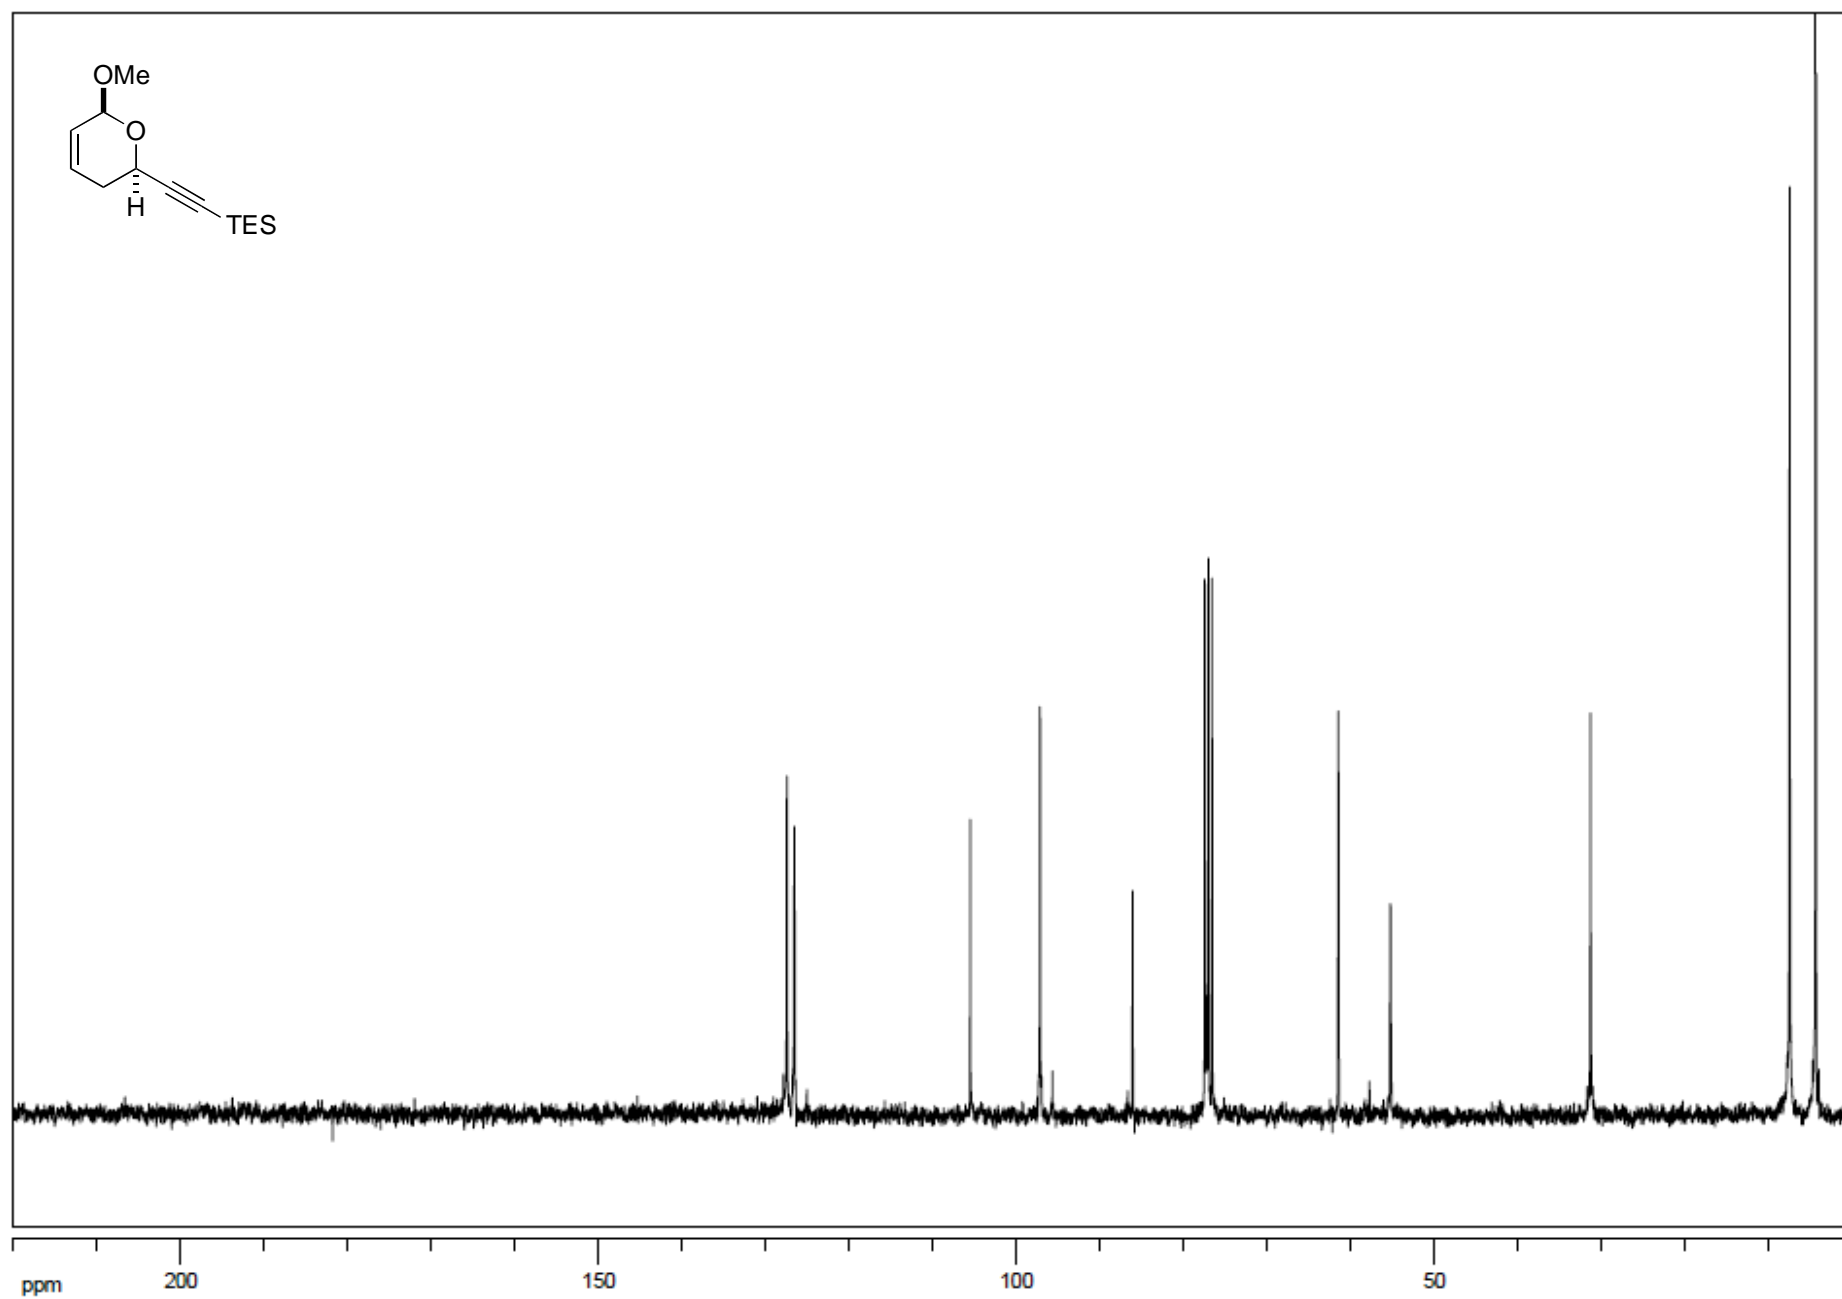

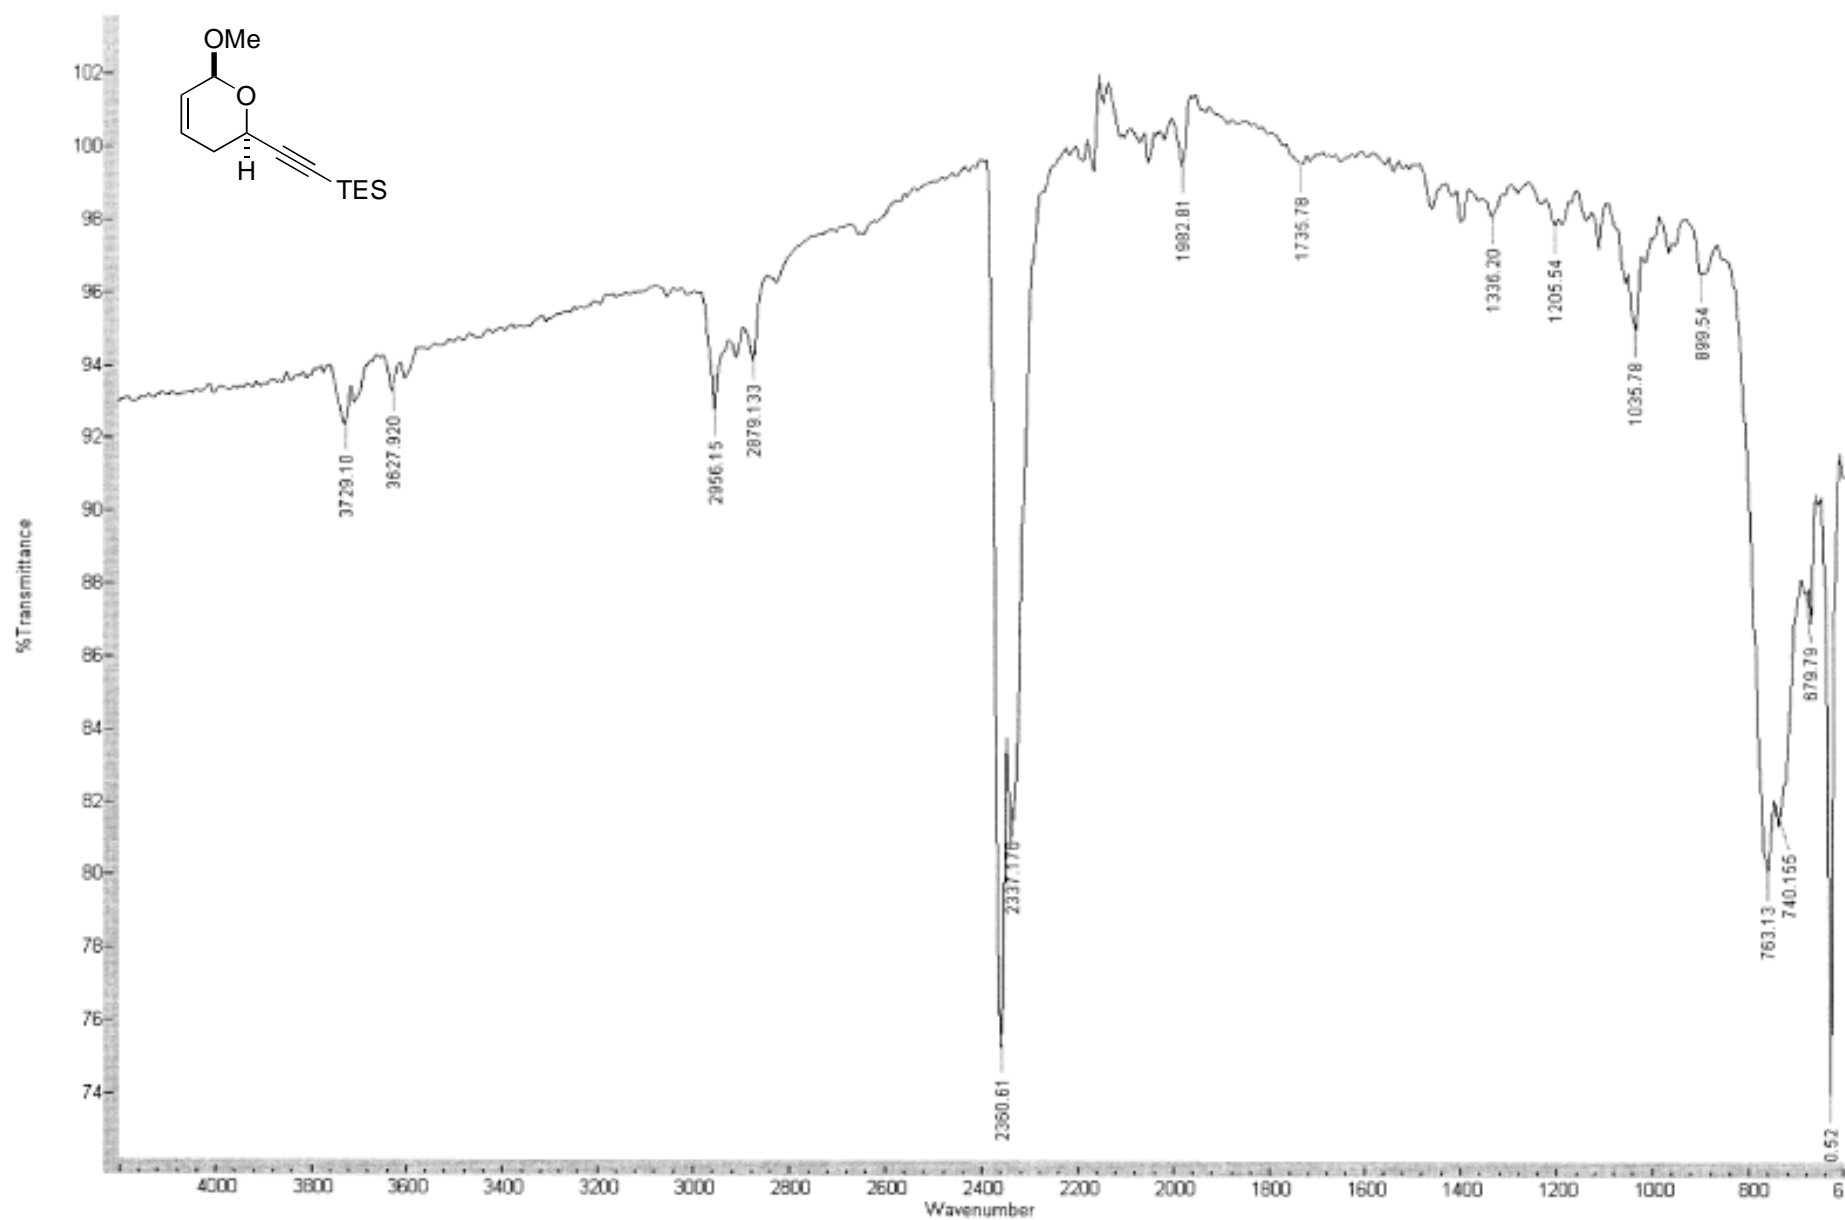

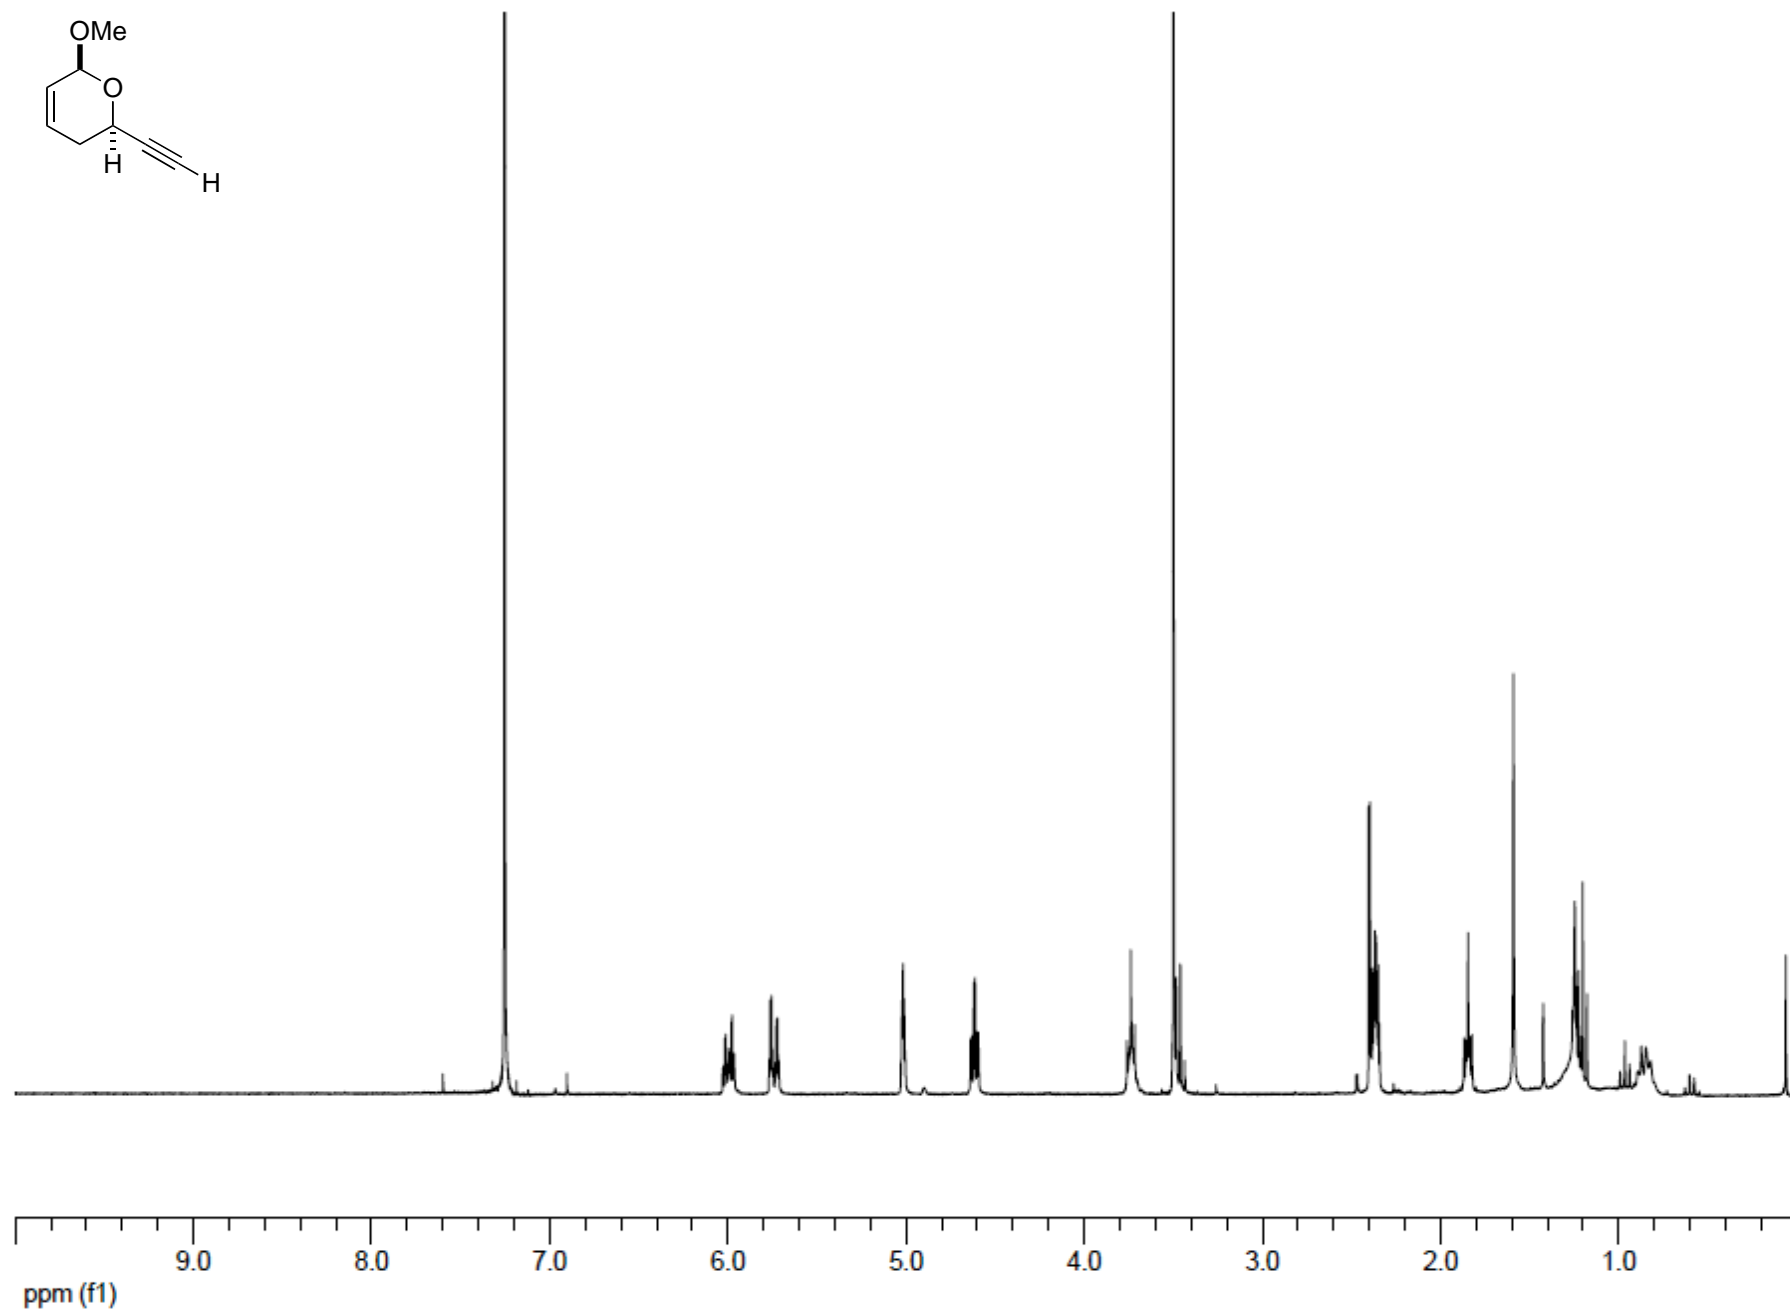

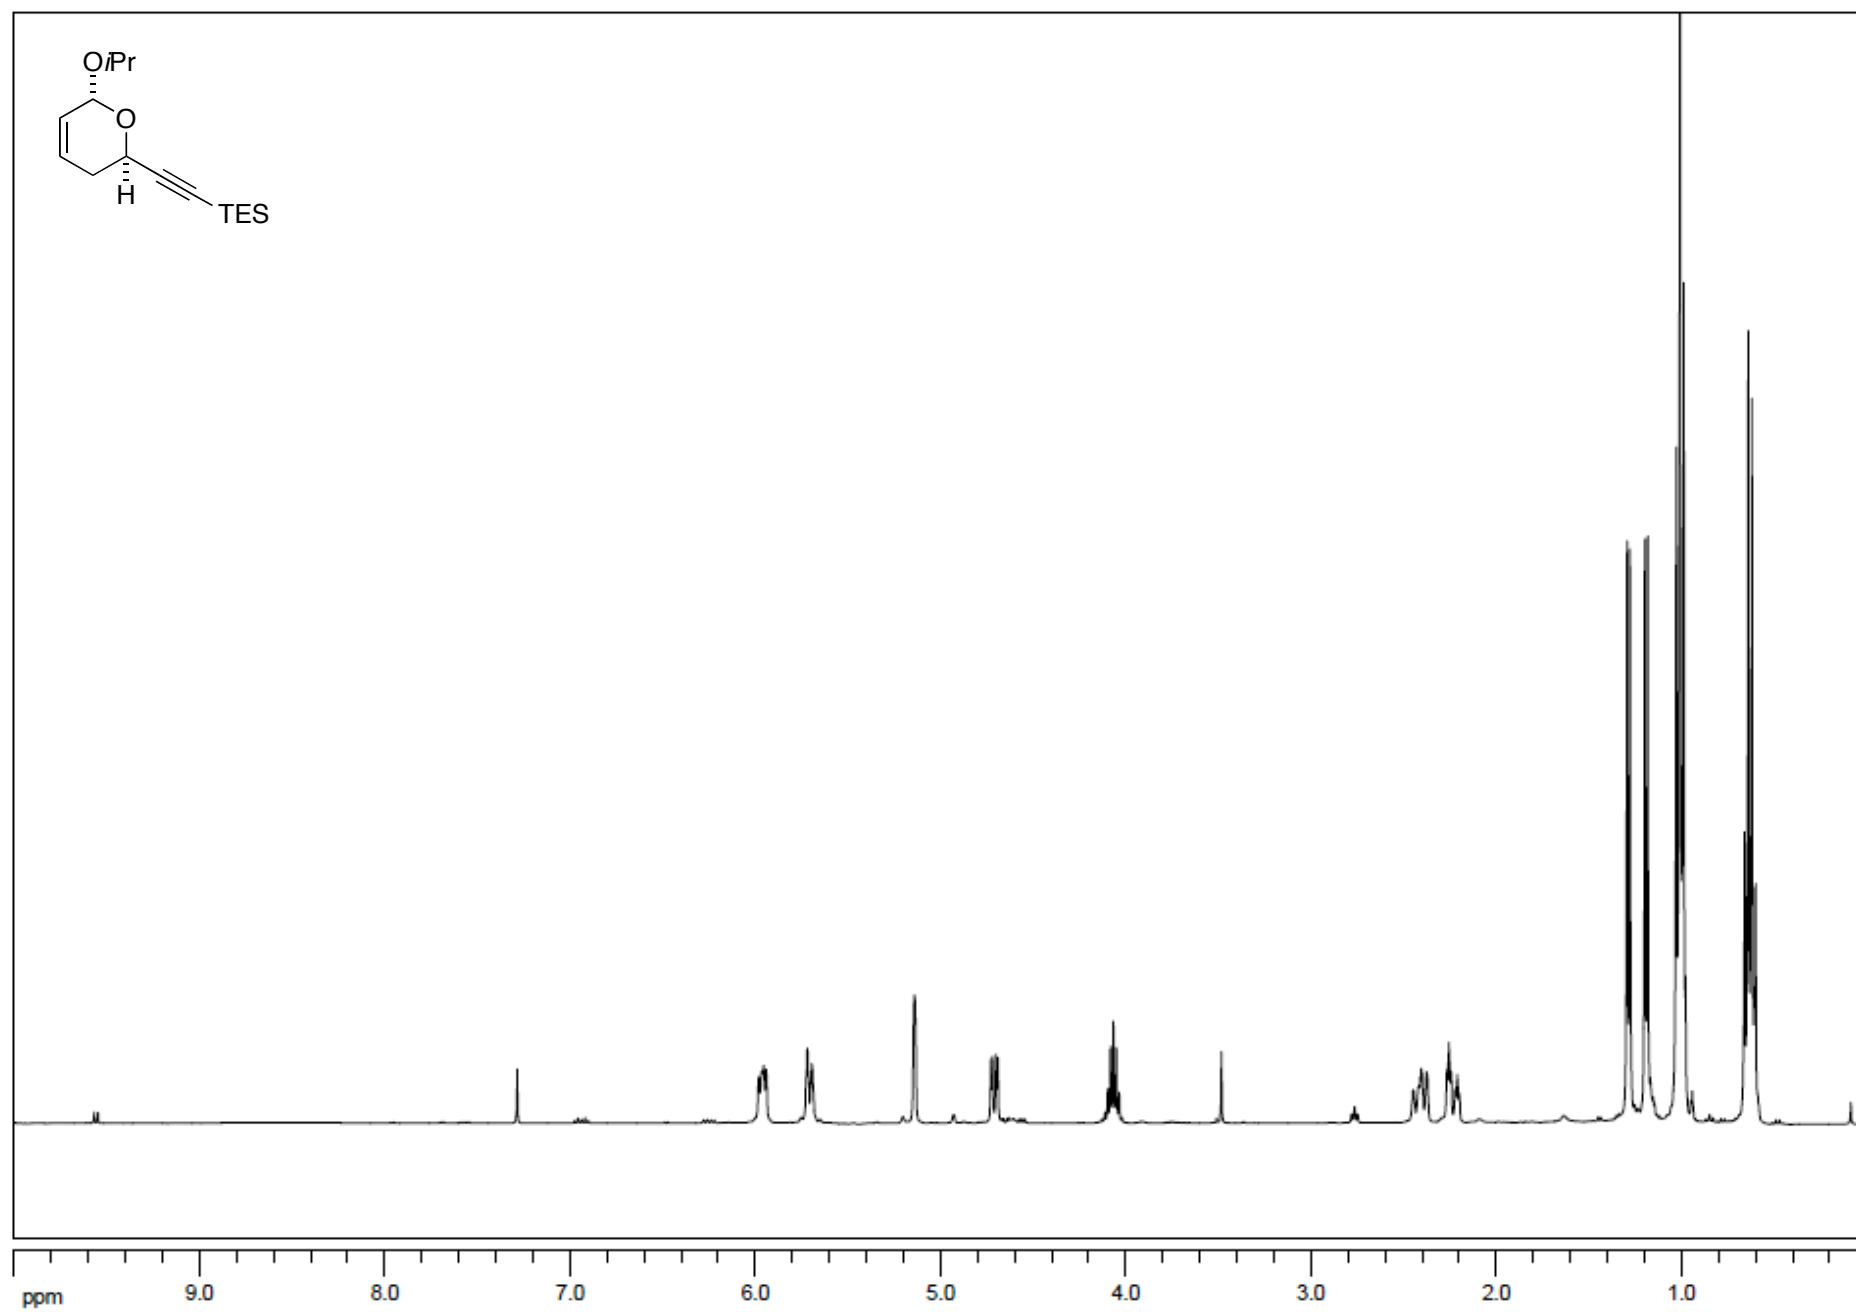

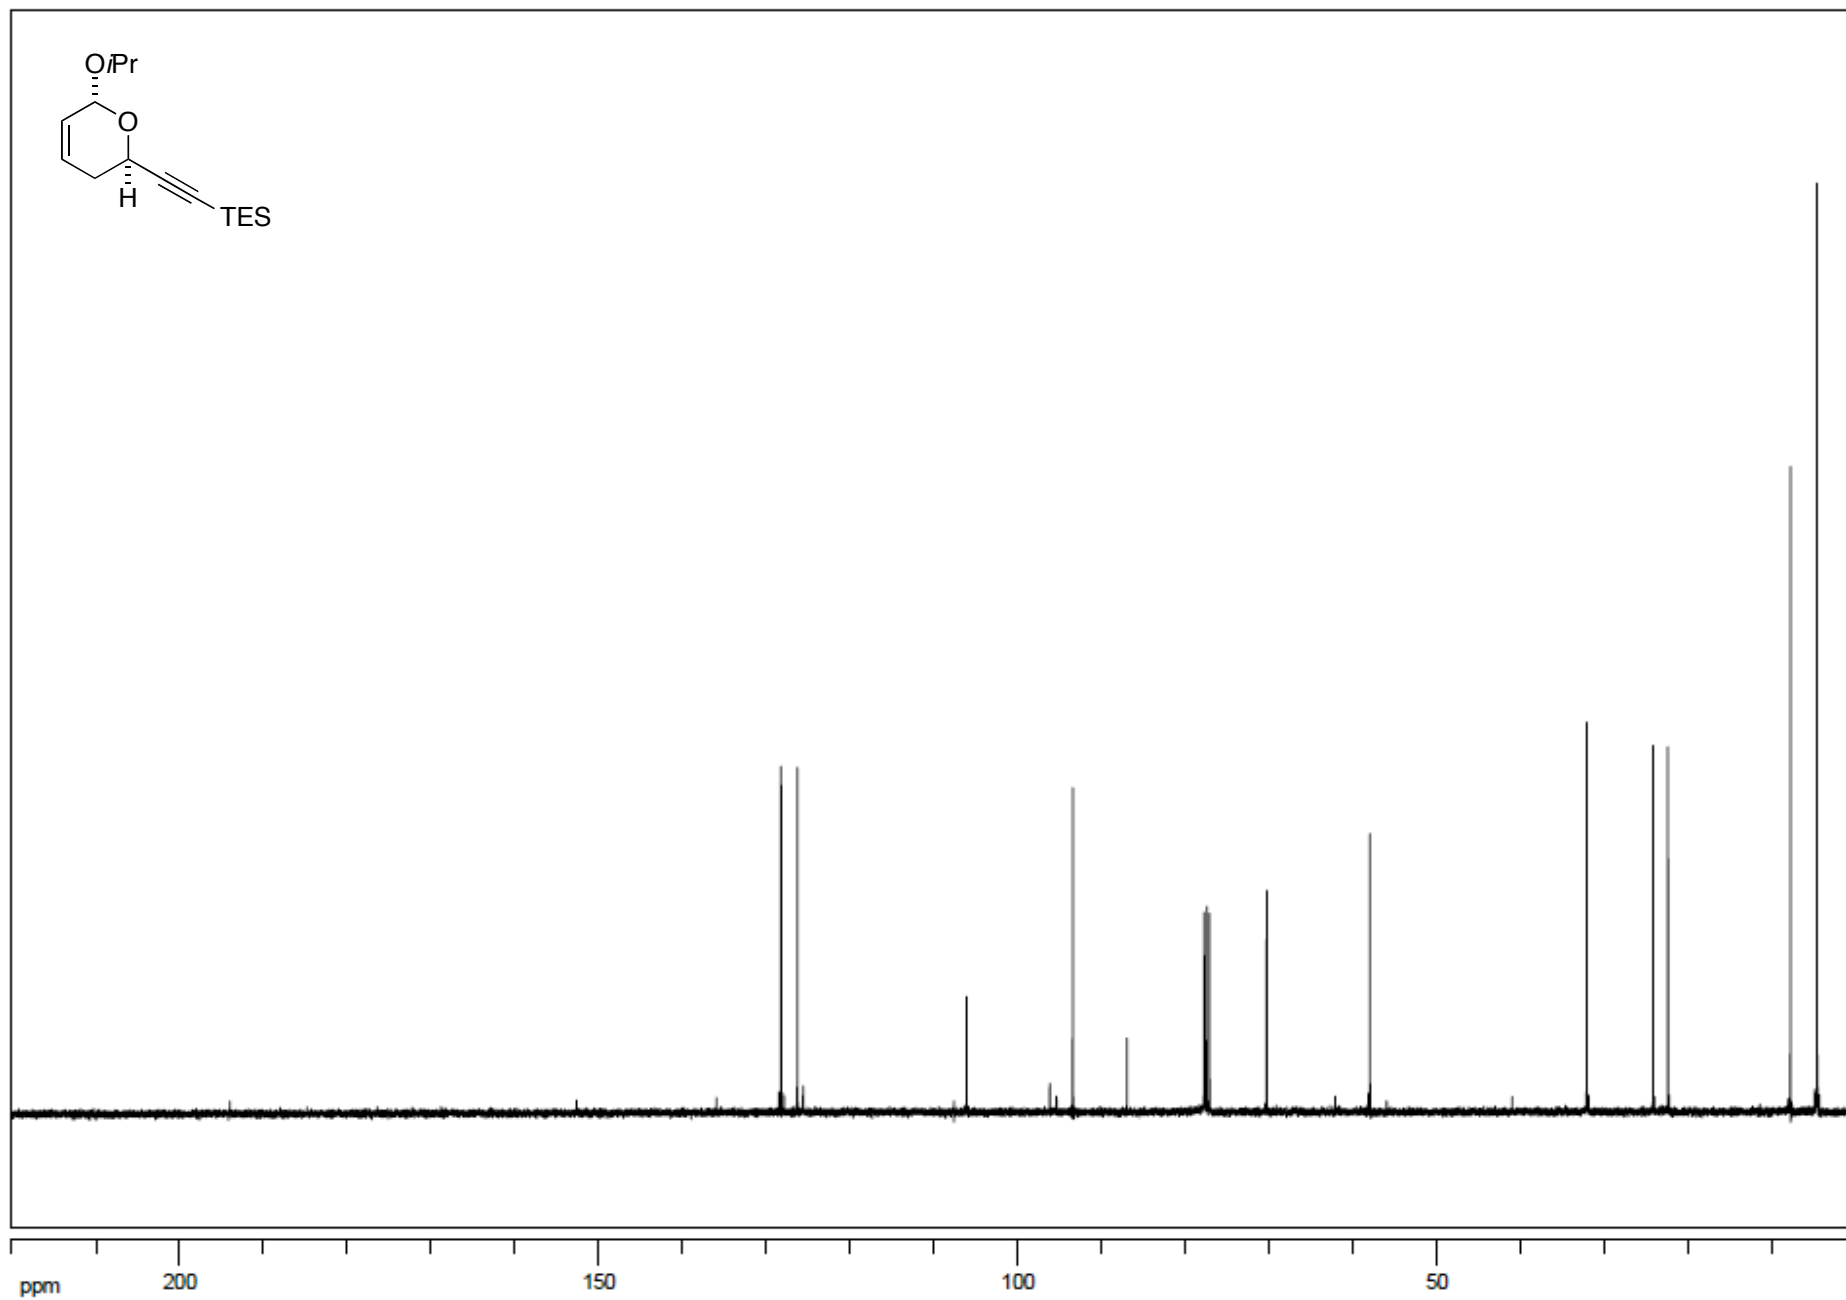



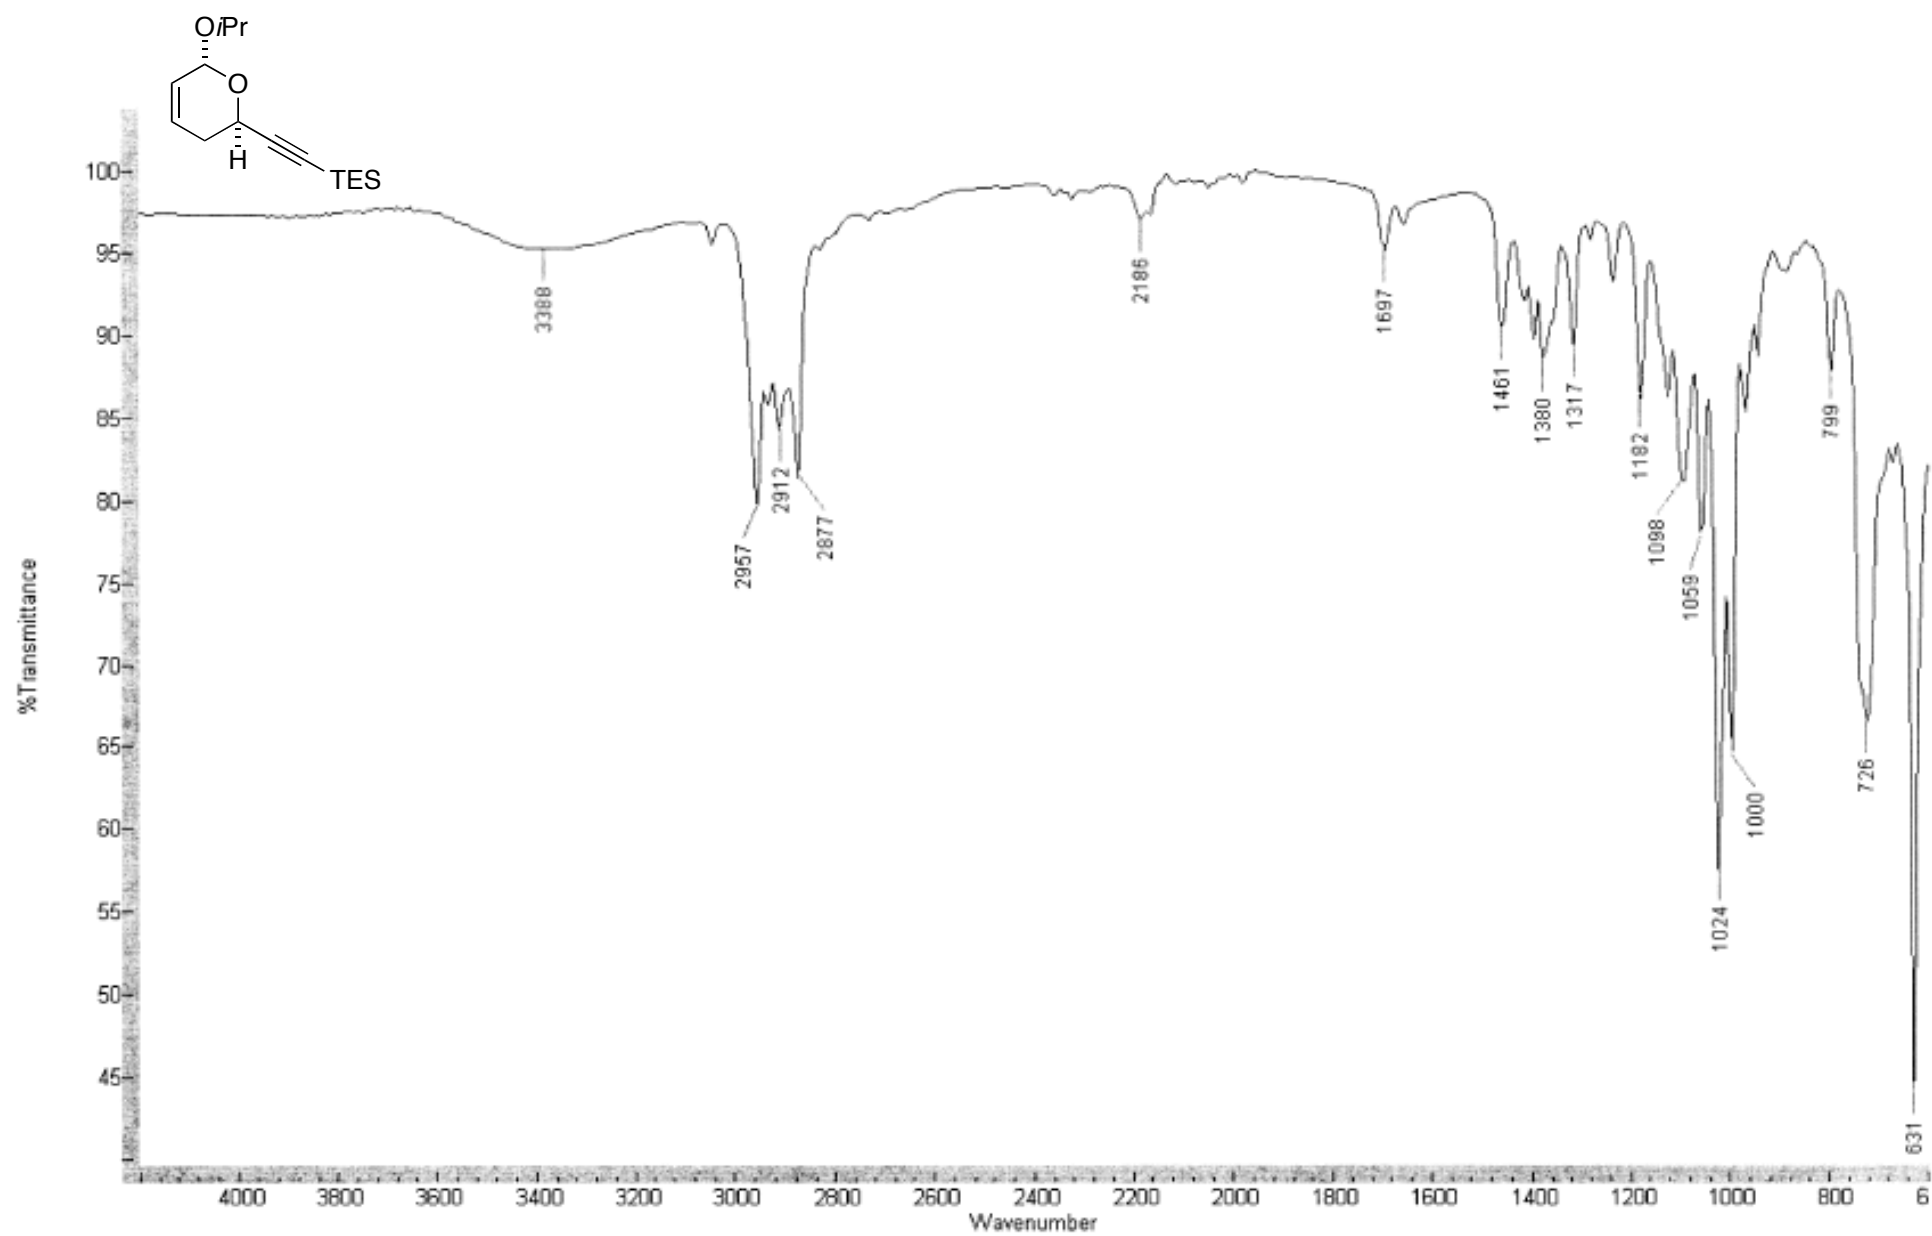

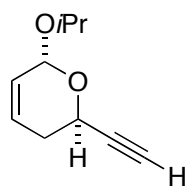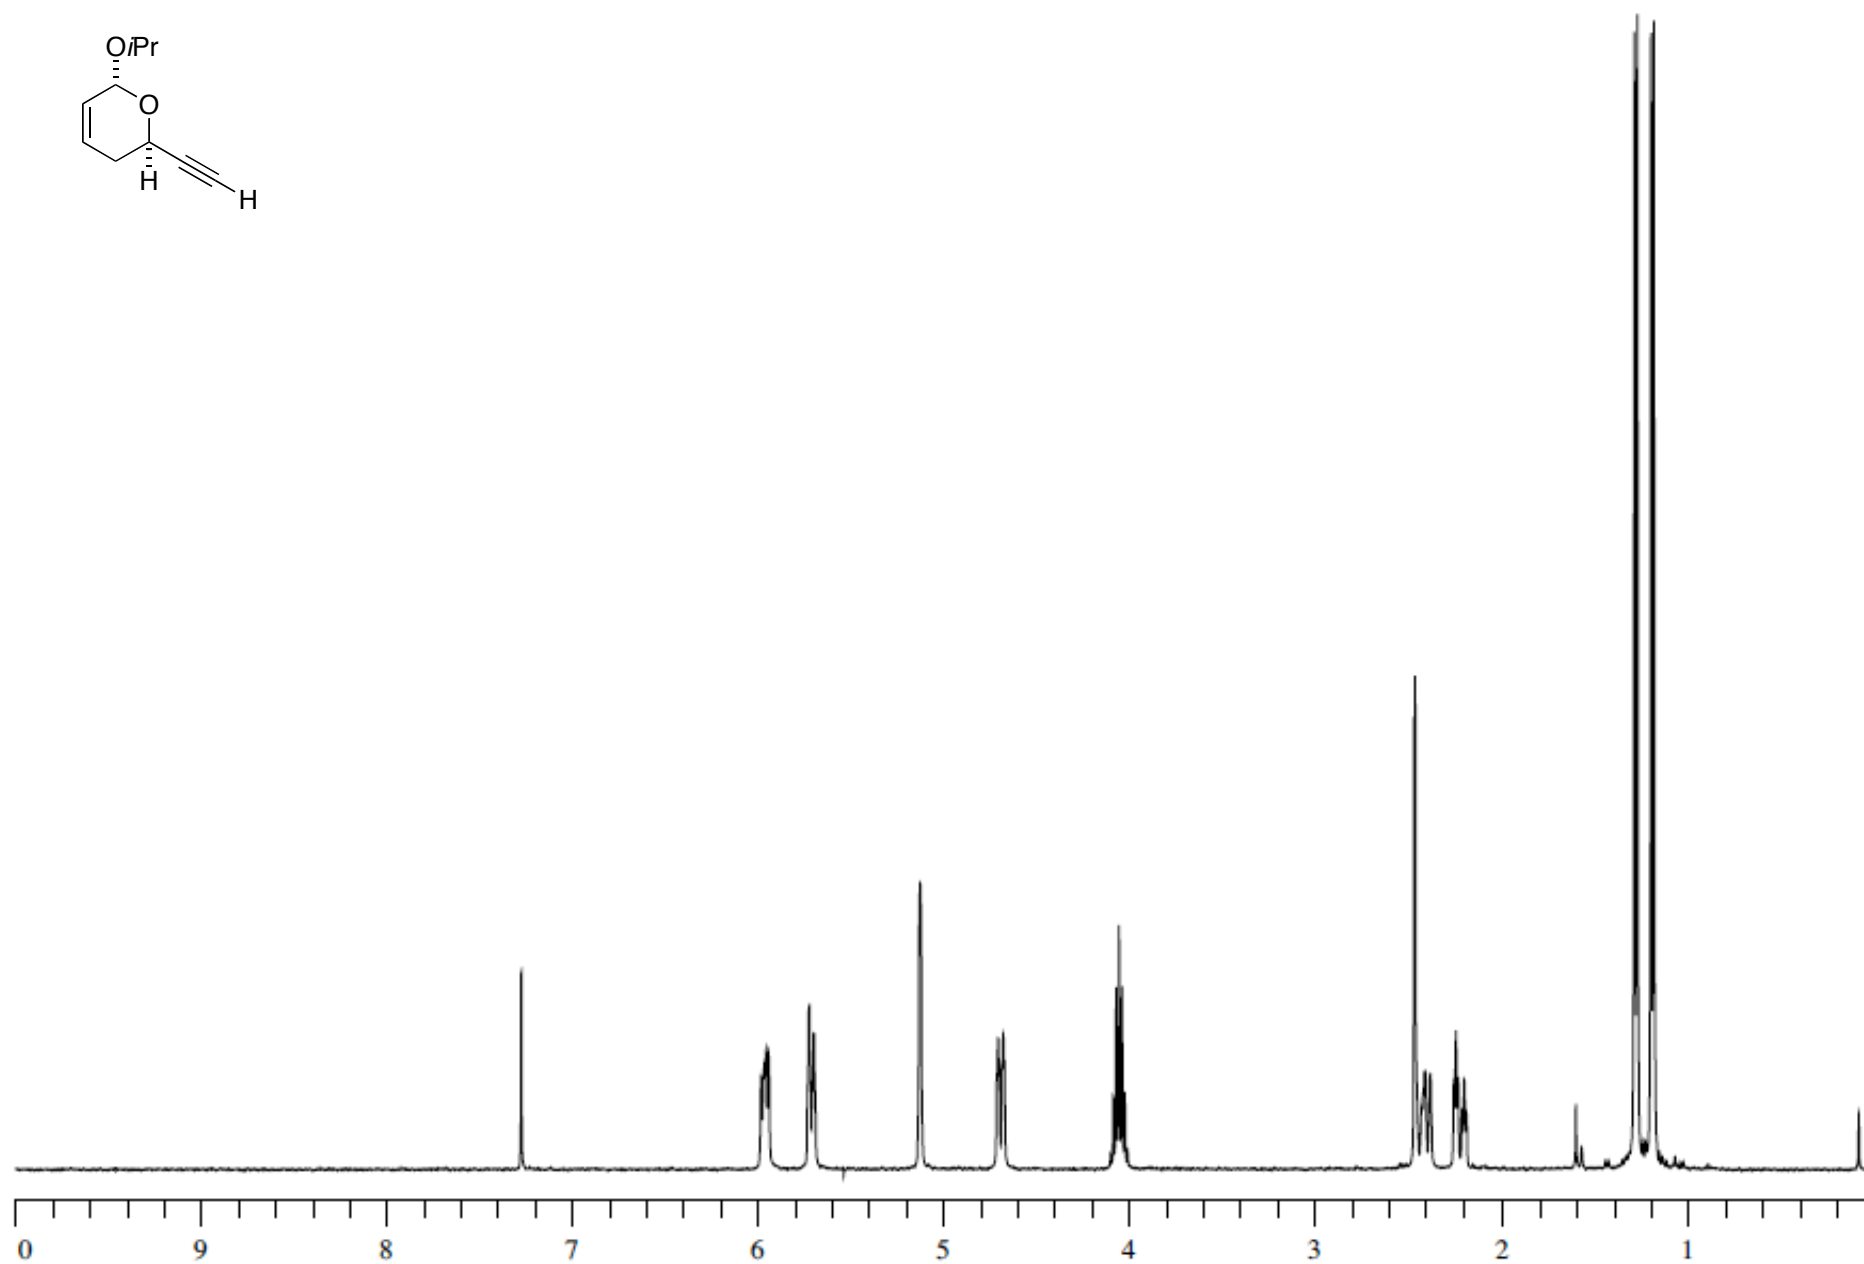

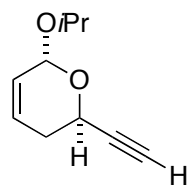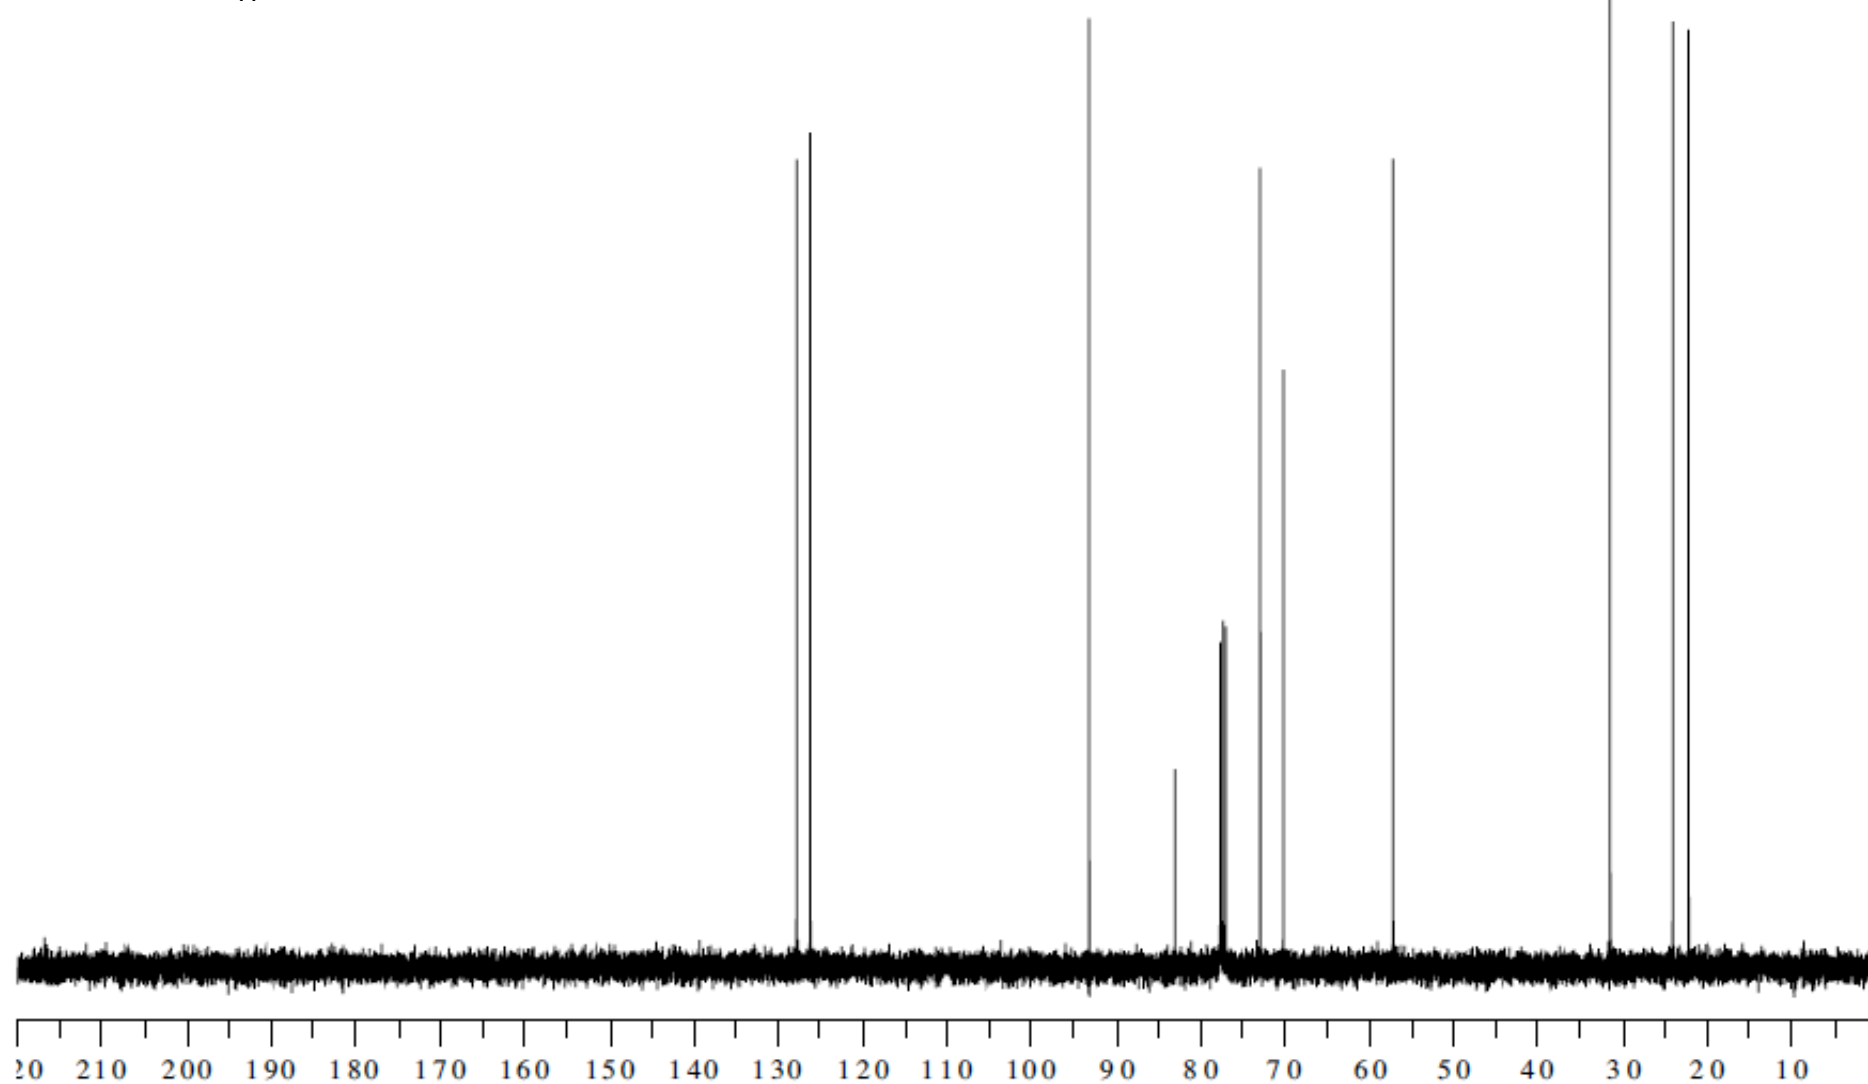

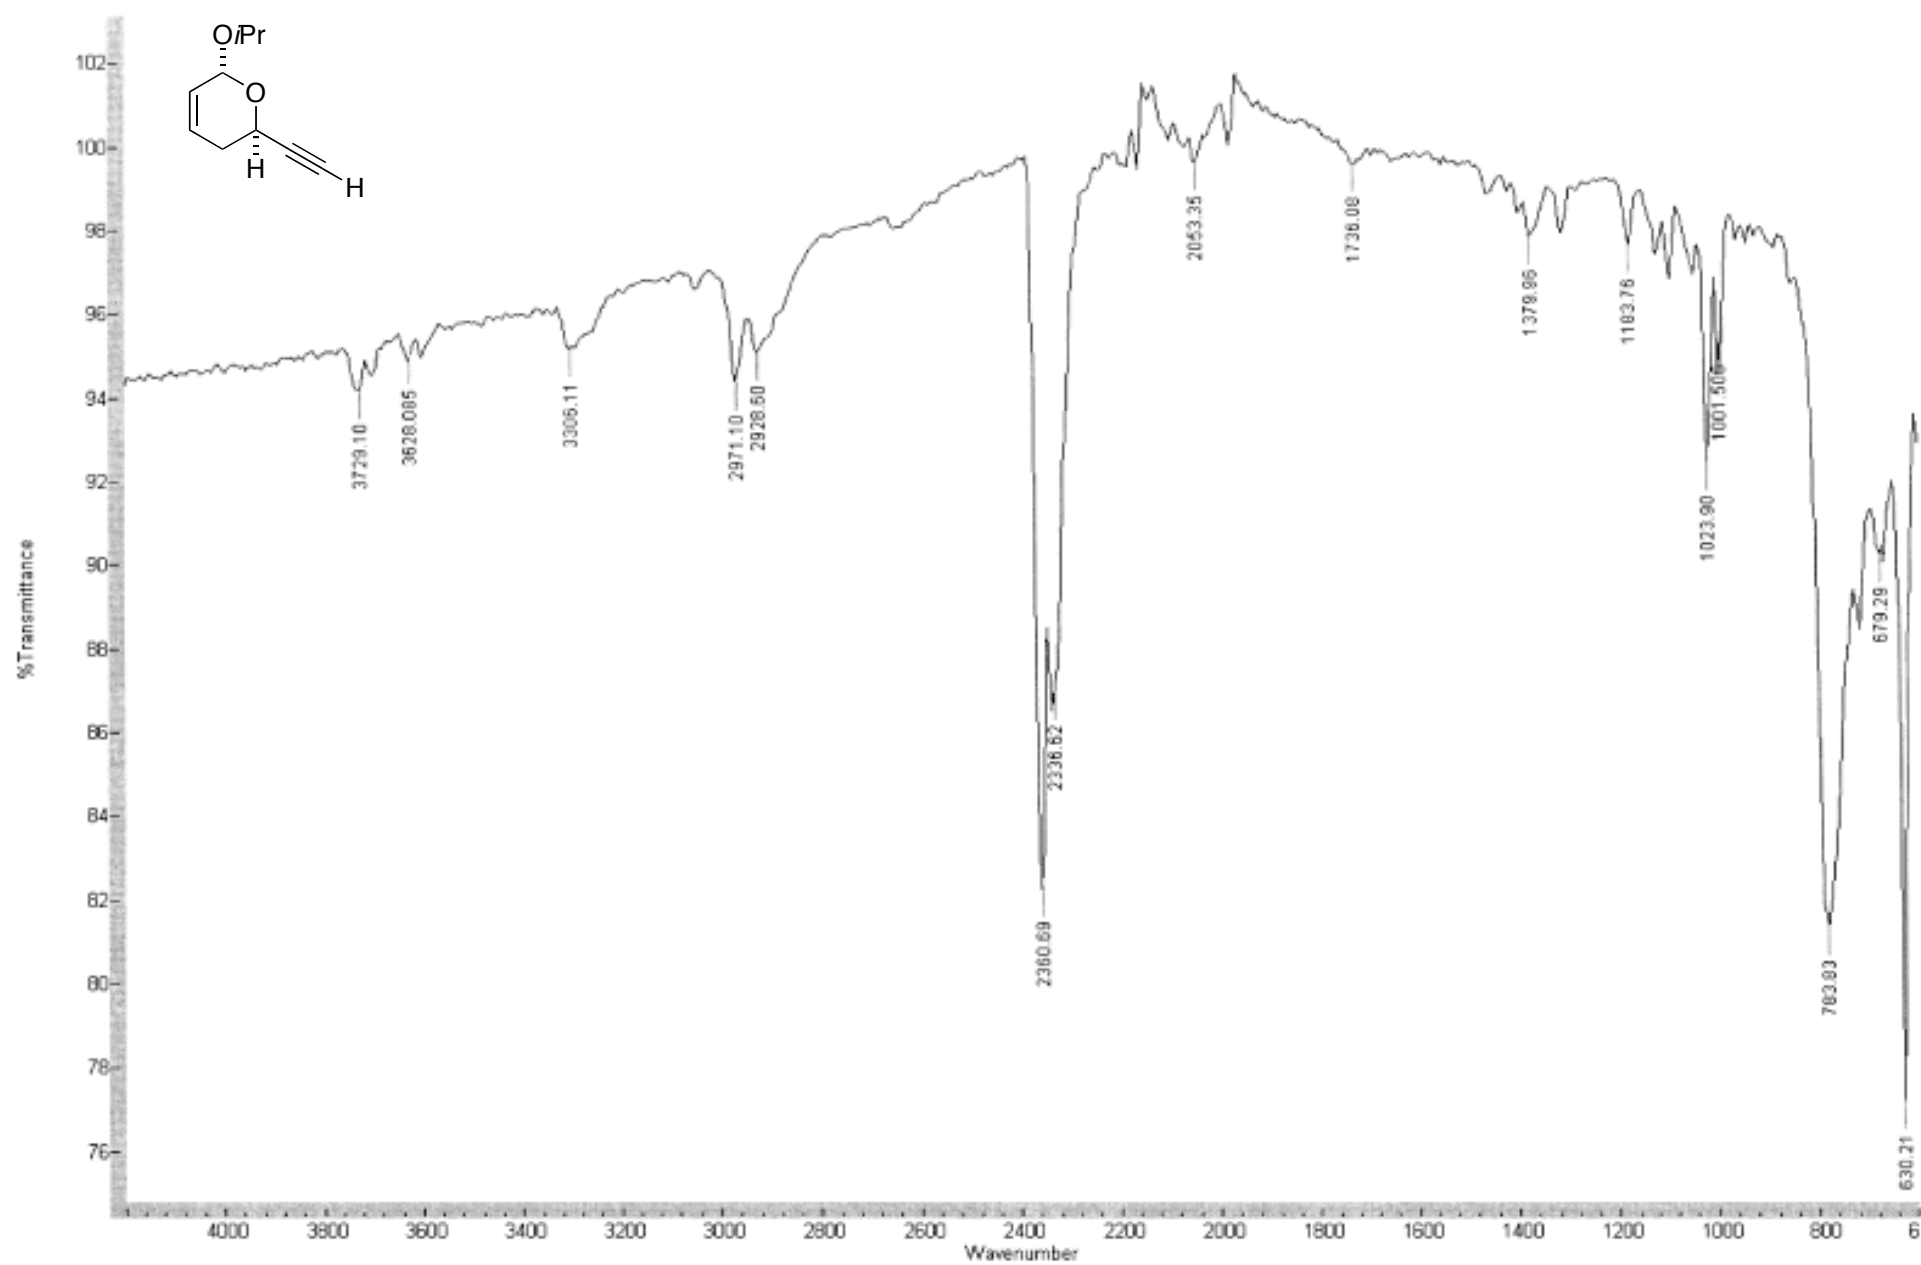

Current Data Parameters  
NAME F0165  
EXPNO 1  
PROCNO 1

F2 - Acquisition Parameters  
Date\_ 20040111  
Time 9.05  
INSTRUM spect  
PROBHD 5 mm BBI 1H-  
PULPROG zgpg30  
TD 65536  
SOLVENT CDCl3  
NS 12  
DS 0  
SWH 8090.615 Hz  
FIDRES 0.089764 Hz  
AQ 5.5689716 sec  
RG 88.6  
DQ 61.880 usec  
DE 6.80 usec  
TE 300.0 K  
SI 0.01000000 sec

\*\*\*\*\* CHANNEL f1 \*\*\*\*\*  
NUC1 1H  
P1 7.10 usec  
PL1 -4.00 dB  
SFO1 500.132000 MHz

F2 - Processing parameters  
SI 65536  
SF 500.130168 MHz  
WDW no  
SSB 0  
LB 0.00 Hz  
GB 0  
PC 1.80

1D NMR plot parameters  
CH 40.00 cm  
FIDP 9.500 ppm  
F1 4750.29 Hz  
FIDP -0.500 ppm  
F2 -250.01 Hz  
FREQN 0.25000 ppm/cm  
SICH 129.00750 Hz/cm

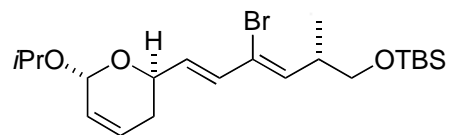

S. Bonazzi/Carreira SB 77 Opr:Br  
500MHz 1H-NMR

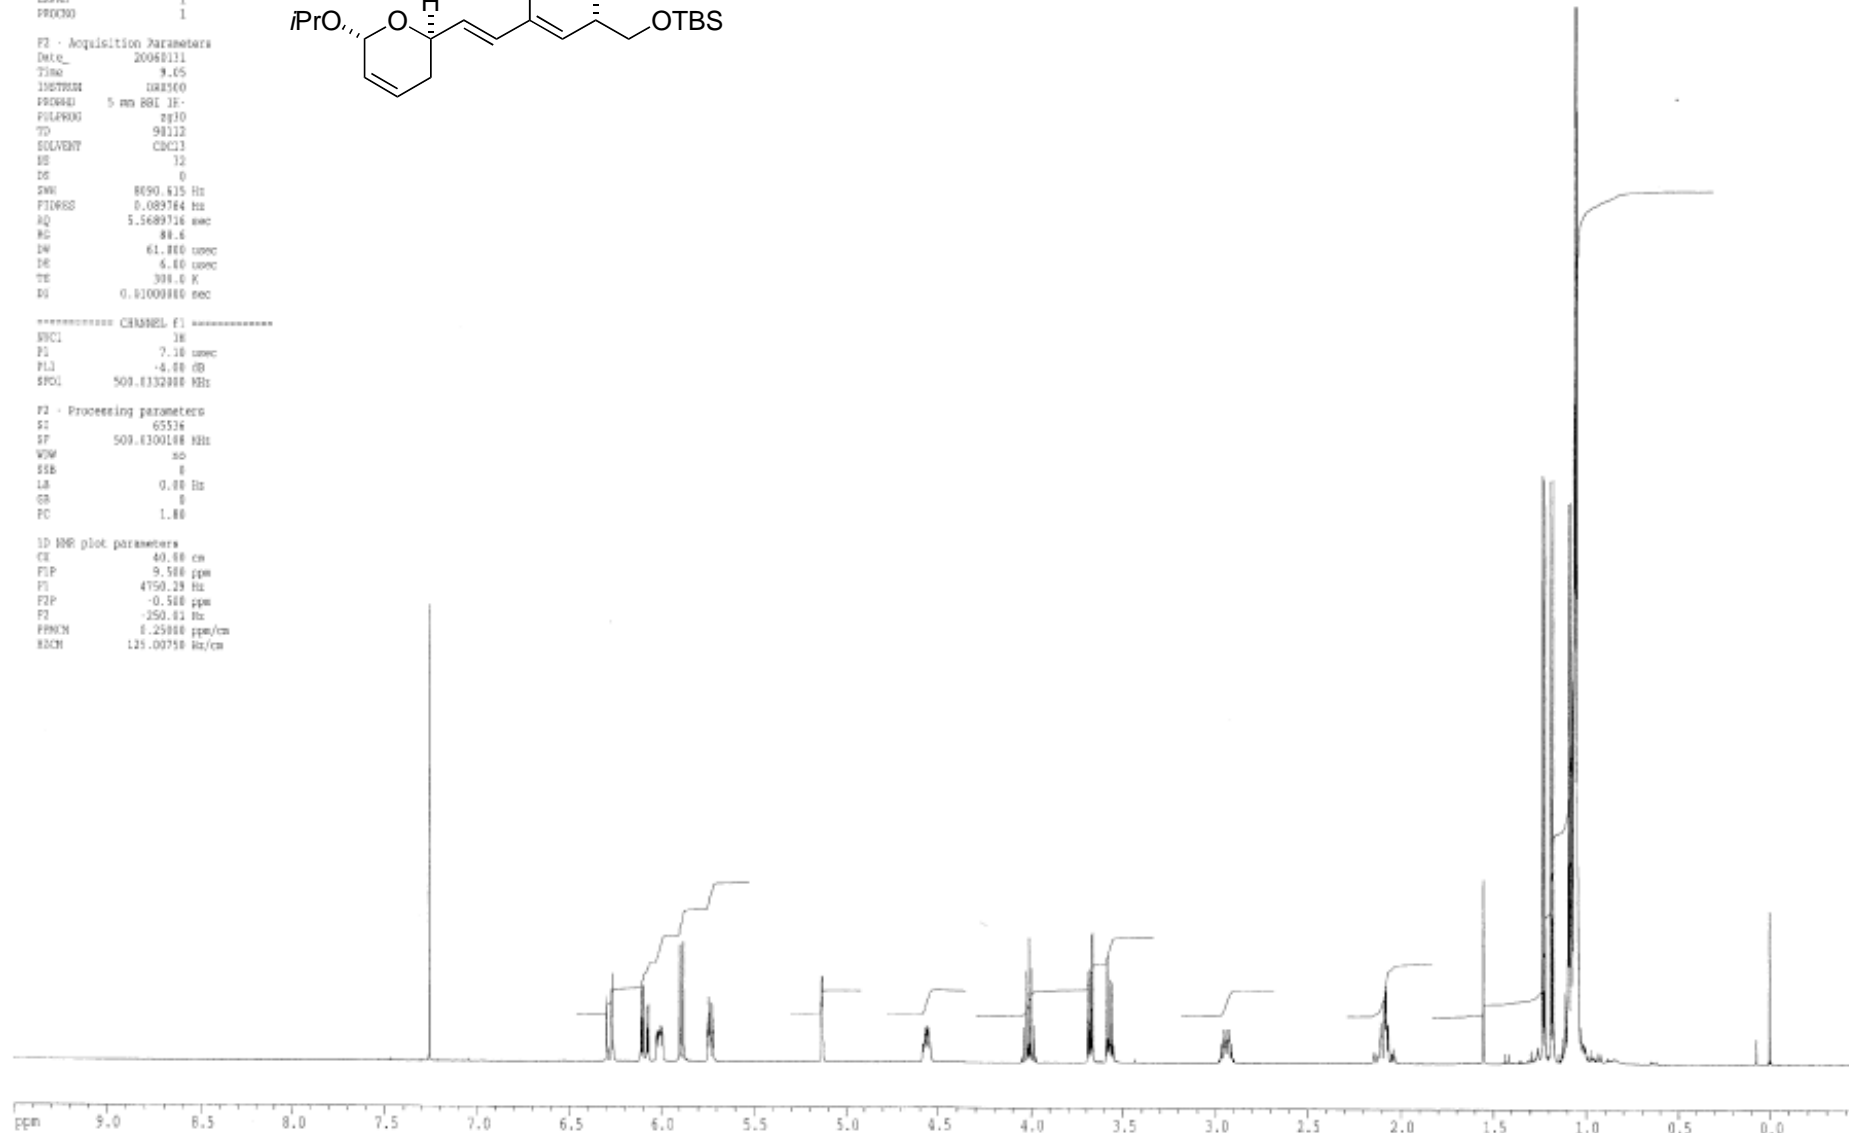

S. Bonazzi/Carreira SB 77 Opr: Br  
125 MHz BB 13C NMR

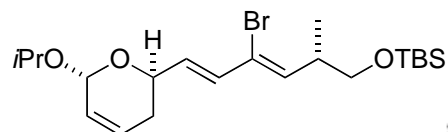

Current Data Parameters  
NAME F0185  
EXPNO 2  
PROCNO 1

## F2 - Acquisition Parameters

Date\_ 20080201  
Time 7.56  
INSTRUM drx2500  
PROBHD 5 mm BBO BB-  
PULPROG zgpg30  
TD 131072  
SOLVENT CDCl3  
NS 2000  
DS 0  
SWH 11152.648 Hz  
FIDRES 0.237676 Hz  
AQ 2.1037557 sec  
RG 13824  
IN 16.850 usec  
DE 39.00 usec  
TE 298.0 K  
D0 0.10000101 sec  
d11 0.00000100 sec  
d12 0.00000100 sec

----- CHANNEL F1 -----  
NUC1 13C  
P1 9.00 usec  
PL1 0.00 dB  
SFO1 125.7715724 MHz

----- CHANNEL F2 -----  
CPDPRG2 waltz16  
NUC2 1H  
PCPD2 80.00 usec  
PL2 -5.00 dB  
PL12 13.50 dB  
PL13 15.50 dB  
SFO2 500.1320005 MHz

F2 - Processing parameters  
SI 131072  
SF 125.7577665 MHz  
WDW EM  
SSB 0  
LA 1.00 Hz  
GB 0  
PC 1.40

1D NMR plot parameters  
CH 40.00 cm  
FDP 232.000 ppm  
F1 29175.81 Hz  
F2P -0.000 ppm  
F2 -1006.06 Hz  
FREQM 6.00000 ppm/cm  
KDCM 754.54481 Hz/cm

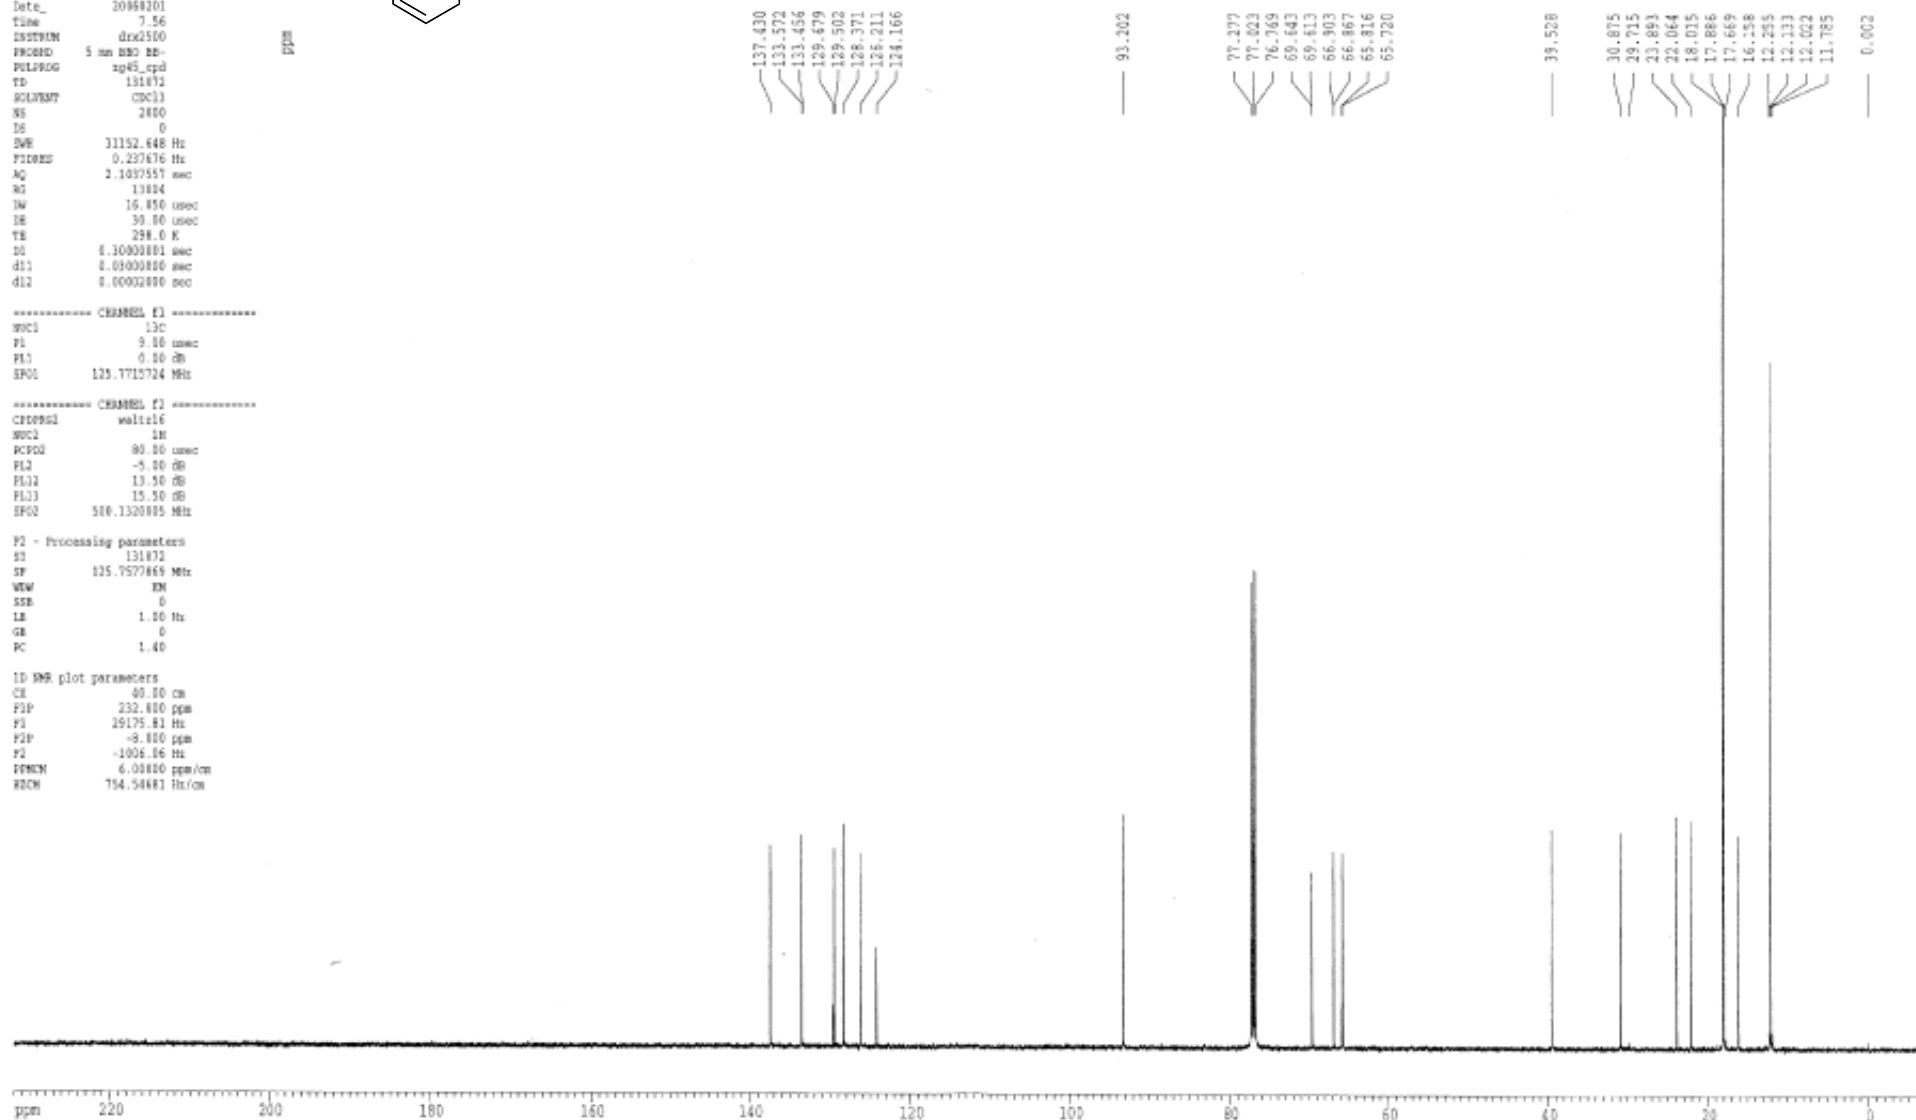

Current Data Parameters  
 NAME F0385  
 EXPNO 3  
 PROCNO 1

## F2 - Acquisition Parameters

Date\_ 20160201  
 Time 9.43  
 INSTRUM drx2500  
 PROBRD 5 mm BB0 BB-  
 PULPROG zgpg30  
 TD 131072  
 SOLVENT CDCl3  
 NS 400  
 DS 0  
 SWH 31152.648 Hz  
 FIDRES 0.217676 Hz  
 AQ 2.1037557 sec  
 RG 13104  
 DW 16.450 usec  
 DB 30.00 usec  
 WB 298.0 K  
 CHST2 145.000000  
 D1 2.0000000 sec  
 d2 0.00344828 sec  
 d12 0.0002000 sec  
 DELTA 0.0001146 sec

## \*\*\*\*\* CHANNEL f1 \*\*\*\*\*

NUC1 13C  
 P1 9.00 usec  
 p2 18.00 usec  
 PL1 0.00 dB  
 SFO1 125.7715724 MHz

## \*\*\*\*\* CHANNEL f2 \*\*\*\*\*

CPDPRG2 waltz16  
 NUC2 1H  
 P0 11.00 usec  
 P3 11.00 usec  
 p4 22.00 usec  
 PCPD2 80.00 usec  
 PL2 -3.00 dB  
 PL12 13.50 dB  
 SFO2 500.1320005 MHz

## F2 - Processing parameters

SI 65536  
 SF 125.7577869 MHz  
 MW 80  
 SSB 0  
 LB 1.00 Hz  
 GB 0  
 PC 1.40

## 1D NMR plot parameters

CI 40.00 cm  
 F1P 232.000 ppm  
 F1 29175.80 Hz  
 F2P -8.000 ppm  
 F2 -1006.96 Hz  
 FPM2M 6.00000 ppm/cm  
 HZCM 754.54675 Hz/cm

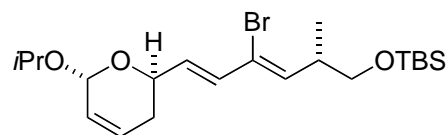

S. Bonazzi/Carrreira SB 77 Opy:Br  
 125 MHz 13C DEPT 90+135 NMR

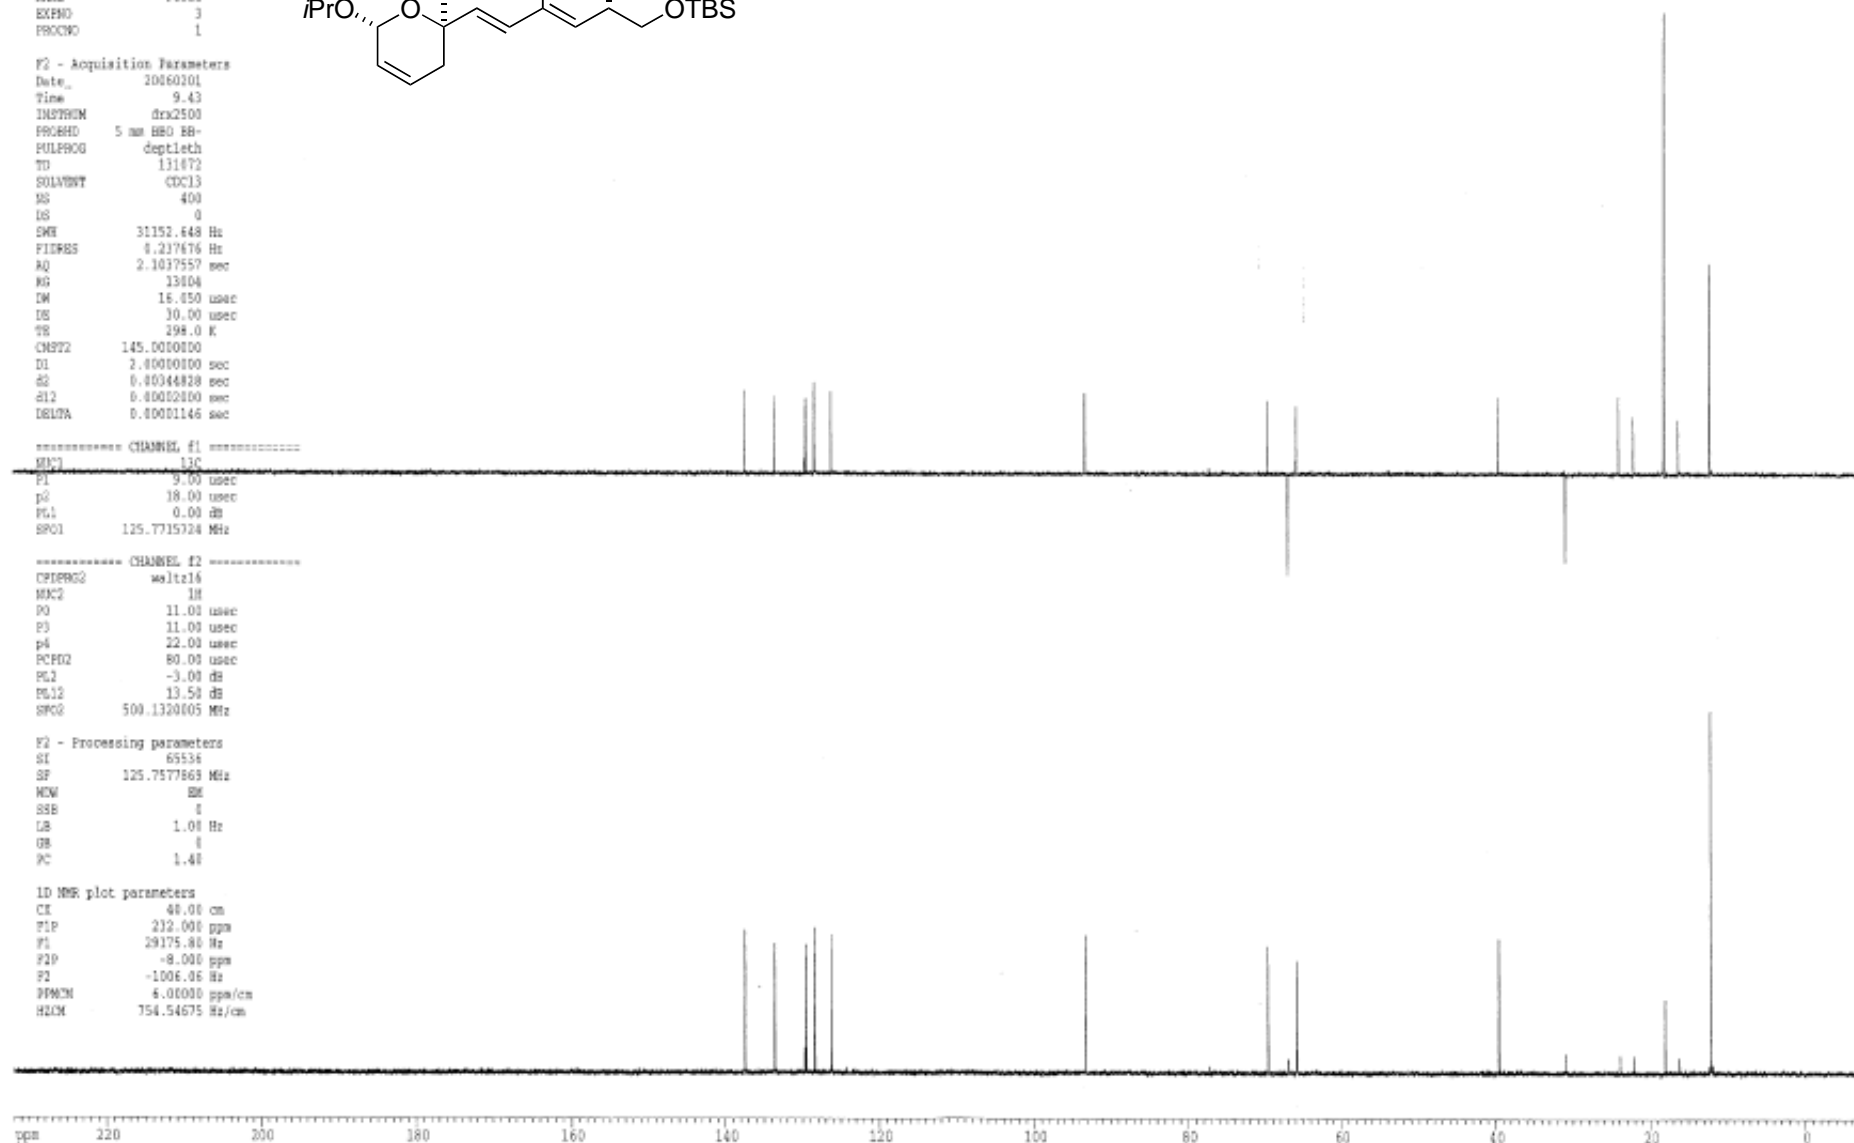

S.Bonazzi/Carreira SB 77 Opr:Br  
500 MHz 1H NMR difference spectrum

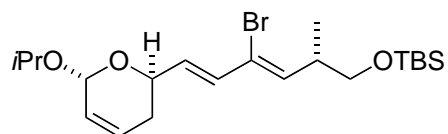

Current Data Parameters  
NAME F0185  
EXPNO 12  
PROCNO 1

F2 - Acquisition Parameters

Date\_ 20060311  
Time 16.17  
INSTRUM spect  
PROBHD 5 mm BBO 1H-  
PULPROG zgpg30  
TD 65536  
SOLVENT CDCl3  
NS 320  
DS 4  
SWH 6040.615 Hz  
FIDRES 0.089784 Hz  
AQ 5.5689716 sec  
RG 80  
DM 61.800 usec  
DE 6.00 usec  
TE 300.2 K  
D1 0.10000000 sec  
d11 0.03000000 sec  
d12 0.00020000 sec  
TDO 0.07000000 sec  
EA 30  
NUC1 1H  
P1 7.10 usec  
PL1 -4.00 dB  
SFO1 500.0330000 MHz  
PQ2LIST 121.66, 4  
NUC2 13C  
PL2 120.00 dB  
PL4 76.00 dB  
SFO2 500.0332000 MHz

F2 - Processing parameters

SI 65536  
SF 500.0301108 MHz  
WDW 80  
SSB 0  
LB 0.60 Hz  
GB 0  
PC 1.00

3D NMR plot parameters  
CE 41.00 cm  
F1P 9.500 ppm  
F2 4751.29 Hz  
F3P -8.500 ppm  
F3 -251.01 Hz  
PPHON 0.21888 ppm/cm  
BZCN 125.81758 Hz/cm

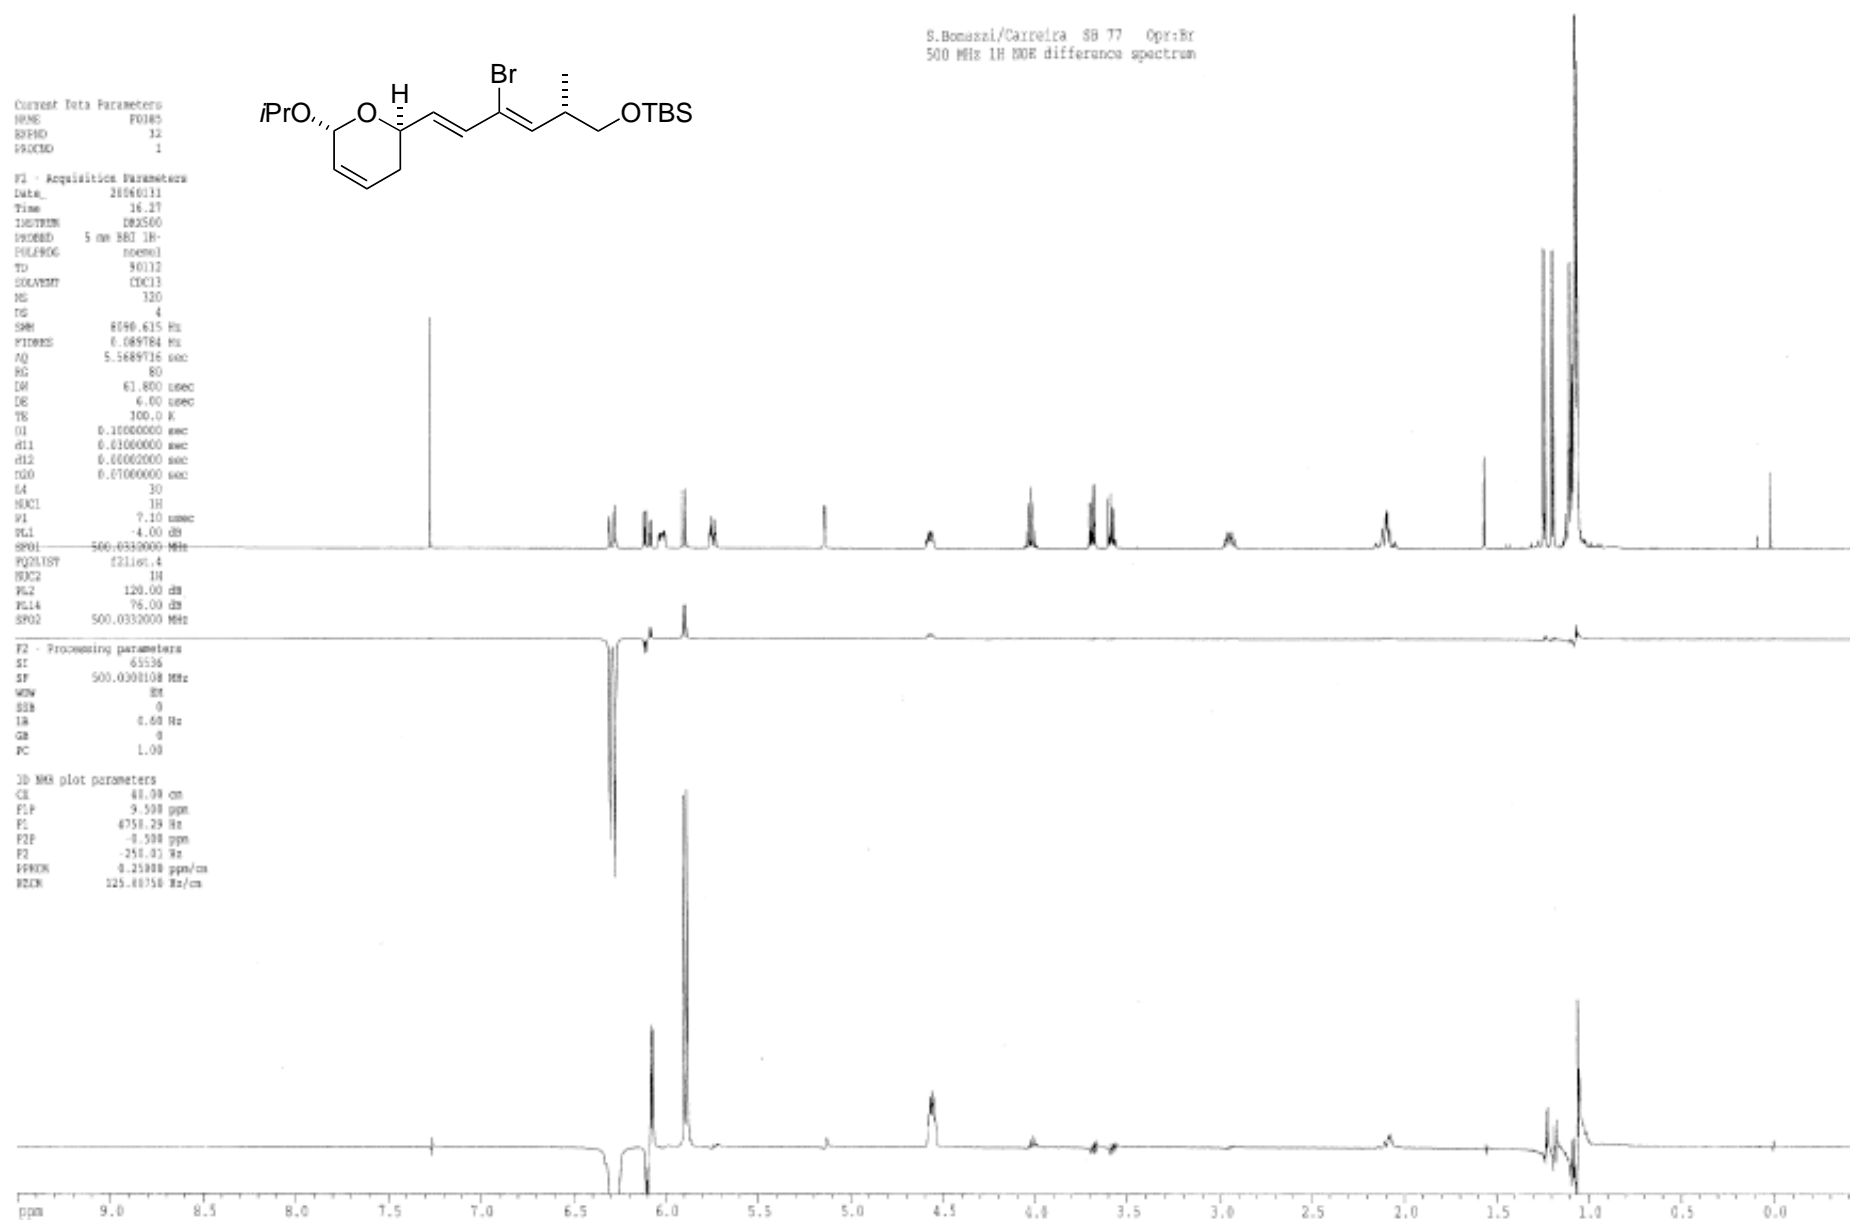



S. Bonazzi/Cerreira SD 77 Opr:Br  
500 MHz 1H NOE difference spectrum

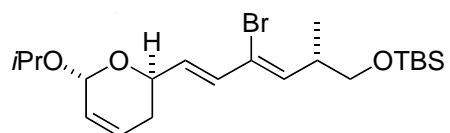

Current Data Parameters  
NAME P0185  
EXPNO 31  
PROCNO 1

F2 - Acquisition Parameters

Date\_ 20160131  
Time 14.25  
INSTRUM spect  
PROBHD 5 mm BBO 1H-  
PULPROG zgpg30  
TD 65536  
SOLVDMF CDCl3  
DS 320  
DS 4  
SWH 8099.615 Hz  
FIDRES 0.000784 Hz  
AQ 5.569714 sec  
RG 80  
DN 61.880 usec  
DE 4.00 usec  
TE 300.2 K  
D1 0.10000000 sec  
d11 0.03000000 sec  
d12 0.00020000 sec  
D20 0.07000000 sec  
LA 30  
WDC1 10  
P1 7.10 usec  
PL1 -4.00 dB  
SFO1 500.032000 MHz  
PCOLIST f2f1et.3  
SFO2 100.628150 MHz  
PL2 120.00 dB  
PL14 16.00 dB  
SFO2 500.032000 MHz

F2 - Processing parameters

SE 65536  
SF 500.032000 MHz  
WDW EM  
SSB 0  
LB 0.60 Hz  
GB 0  
PC 1.00

1D 1H plot parameters

CE 40.00 cm  
F1P 9.560 ppm  
F1 4750.29 Hz  
F2P -0.560 ppm  
F2 -250.01 Hz  
FREQH 500.032000 MHz/cm  
NUC1 125.00750 Hz/cm

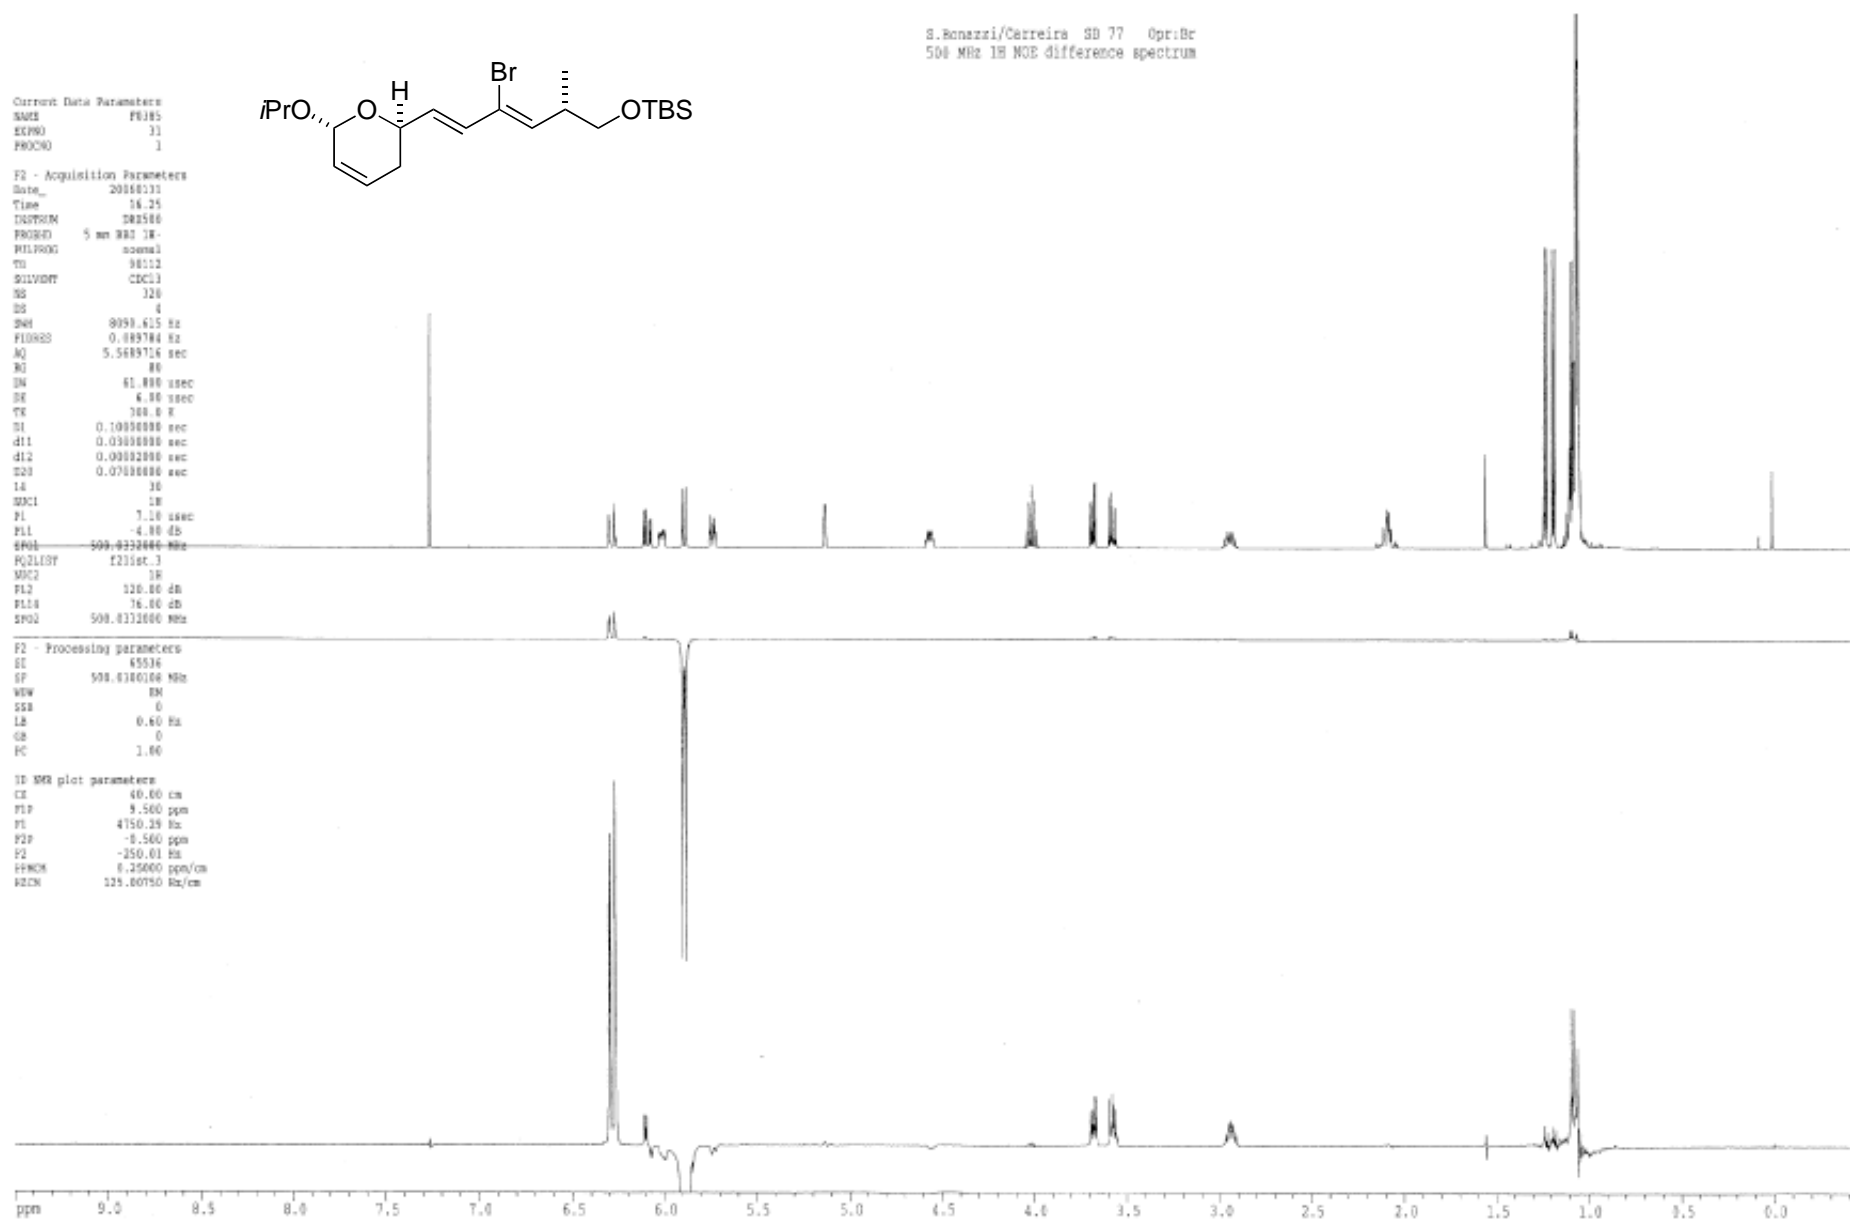

Current Data Parameters  
NAME P3385  
EXTR0 30  
PROC00 1

F2 - Acquisition Parameters  
Date\_ 20160131  
Time 16.22  
INSTRUM spect  
PUSHD 5 cm BBO 1H  
PUSHDG 60cm1  
TD 90112  
SOLVENT CDCl3  
NS 320  
DS 4

Q4H 8090.615 Hz  
FIDH80 0.989784 Hz  
AQ 5.5689714 sec  
RG 80  
RW 61.888 usec  
DE 5.86 usec  
TE 300.0 K  
D0 0.18000000 sec  
d11 1.83000000 sec  
d12 1.86000000 sec  
d10 1.07000000 sec  
S4 30  
HXC1 1H  
P1 7.10 usec  
PL1 -4.00 dB  
SFO1 500.0332000 MHz  
P2LIST P2List.2  
SVC2 1H  
PL2 120.10 dB  
PL3 74.10 dB  
SFO2 500.0332000 MHz

F2 - Processing parameters  
SI 65536  
SF 500.0300108 MHz  
NMR 8H  
SFO 0  
IN 0.60 Hz  
G0 0  
PC 1.00

1D 1H plot parameters  
CH 48.86 cm  
F1P 9.586 ppm  
F1 4750.25 Hz  
F2P -0.500 ppm  
F2 -250.01 Hz  
SFOHCH 0.25000 ppm/cm  
GUCH 125.00750 Hz/cm

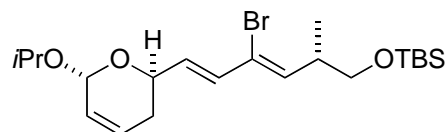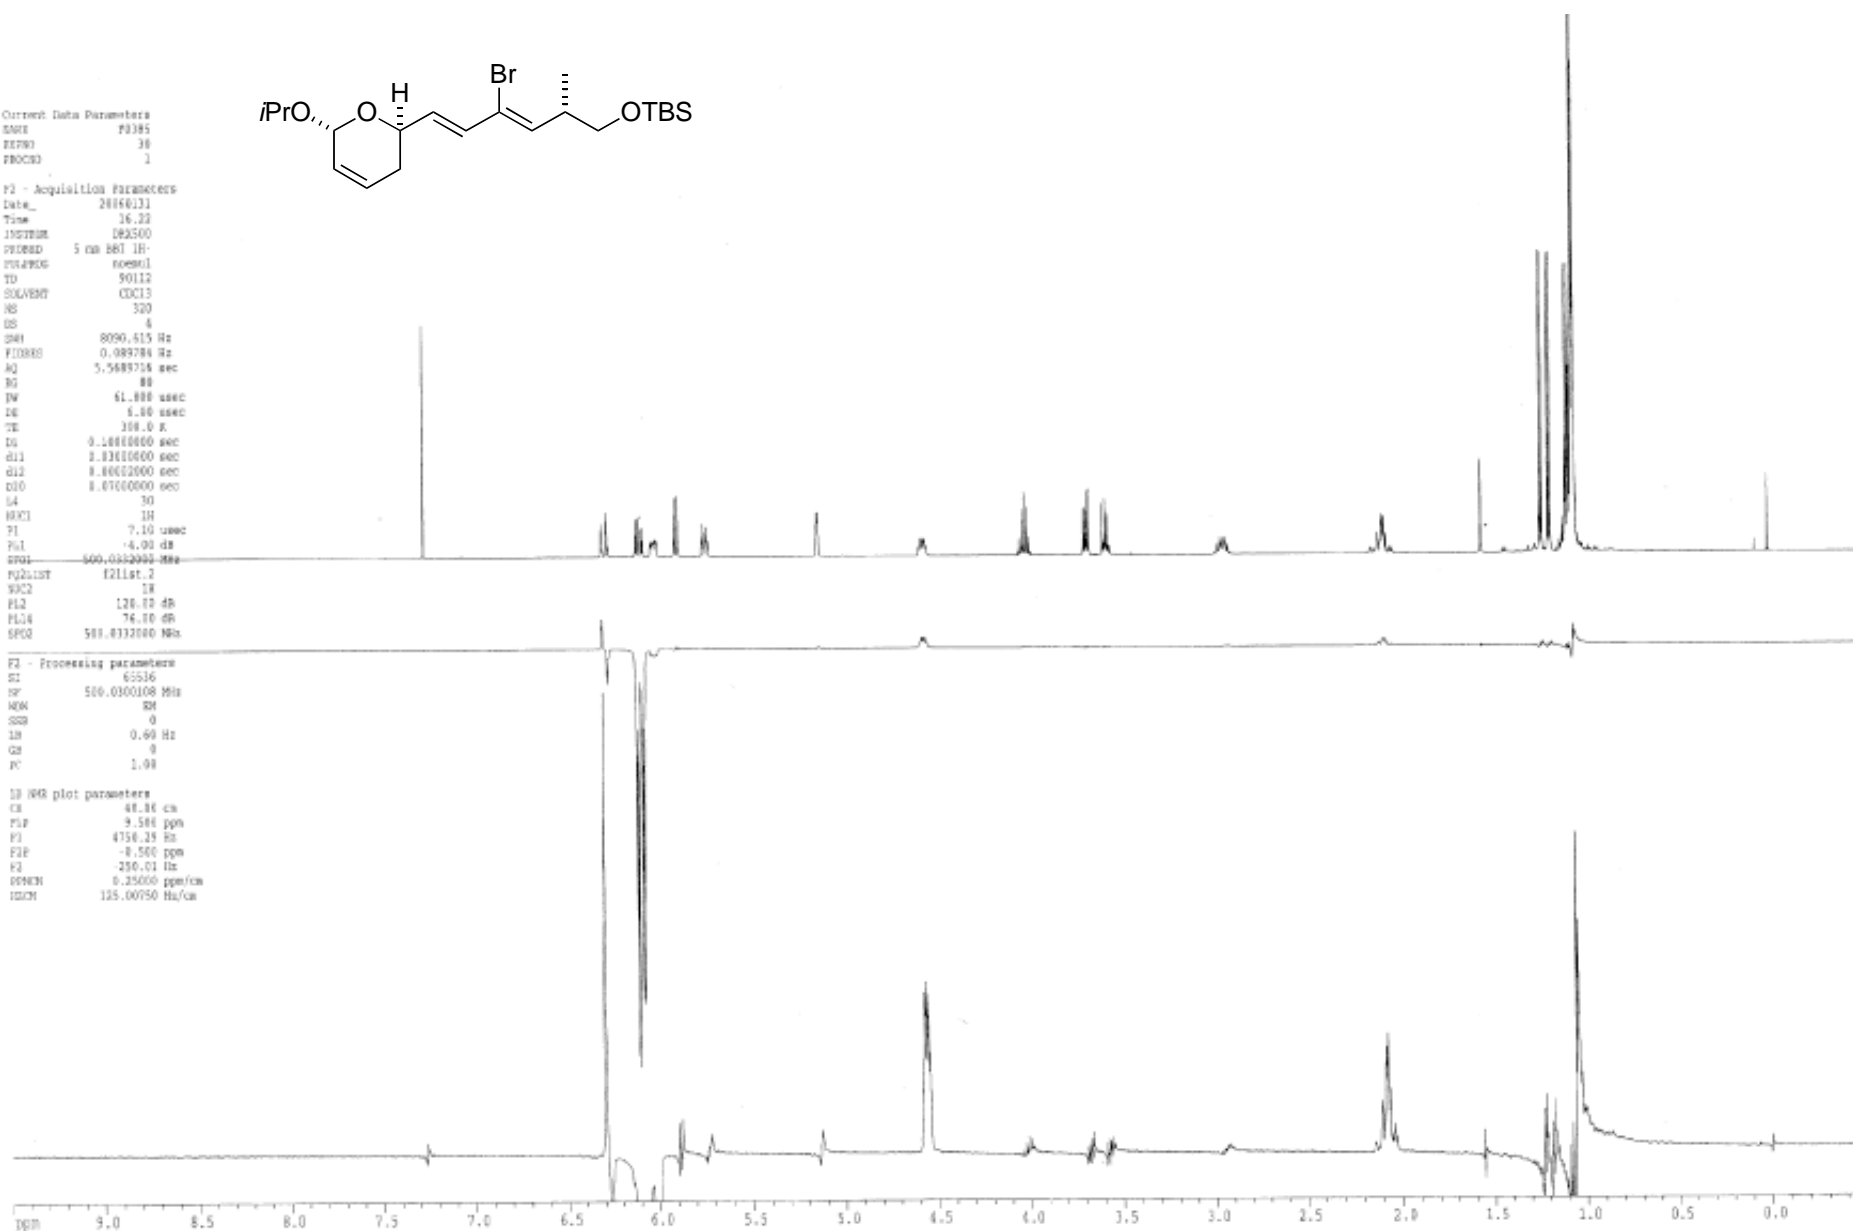



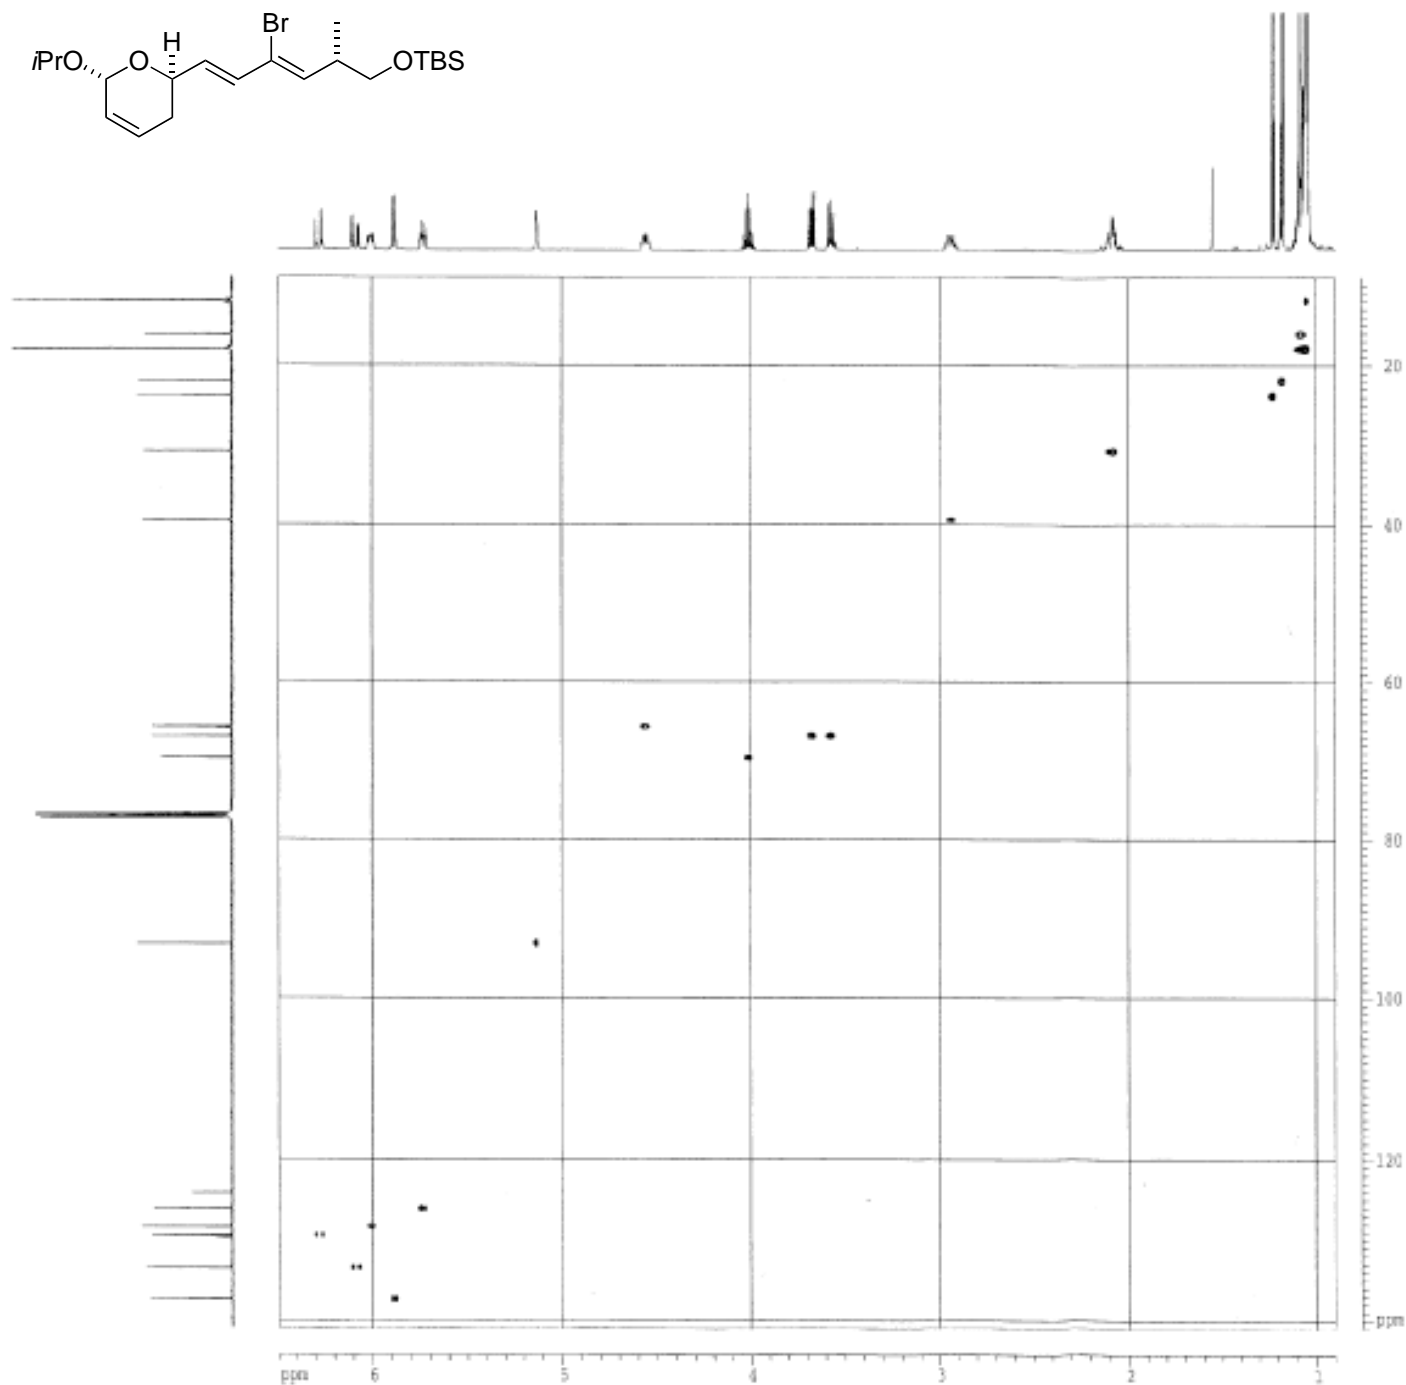

|         |           |         |
|---------|-----------|---------|
| 7217405 | 0.28000   | page/cm |
| 7217406 | 140.00000 | file/cm |
| 7217407 | 4.00000   | row/cm  |

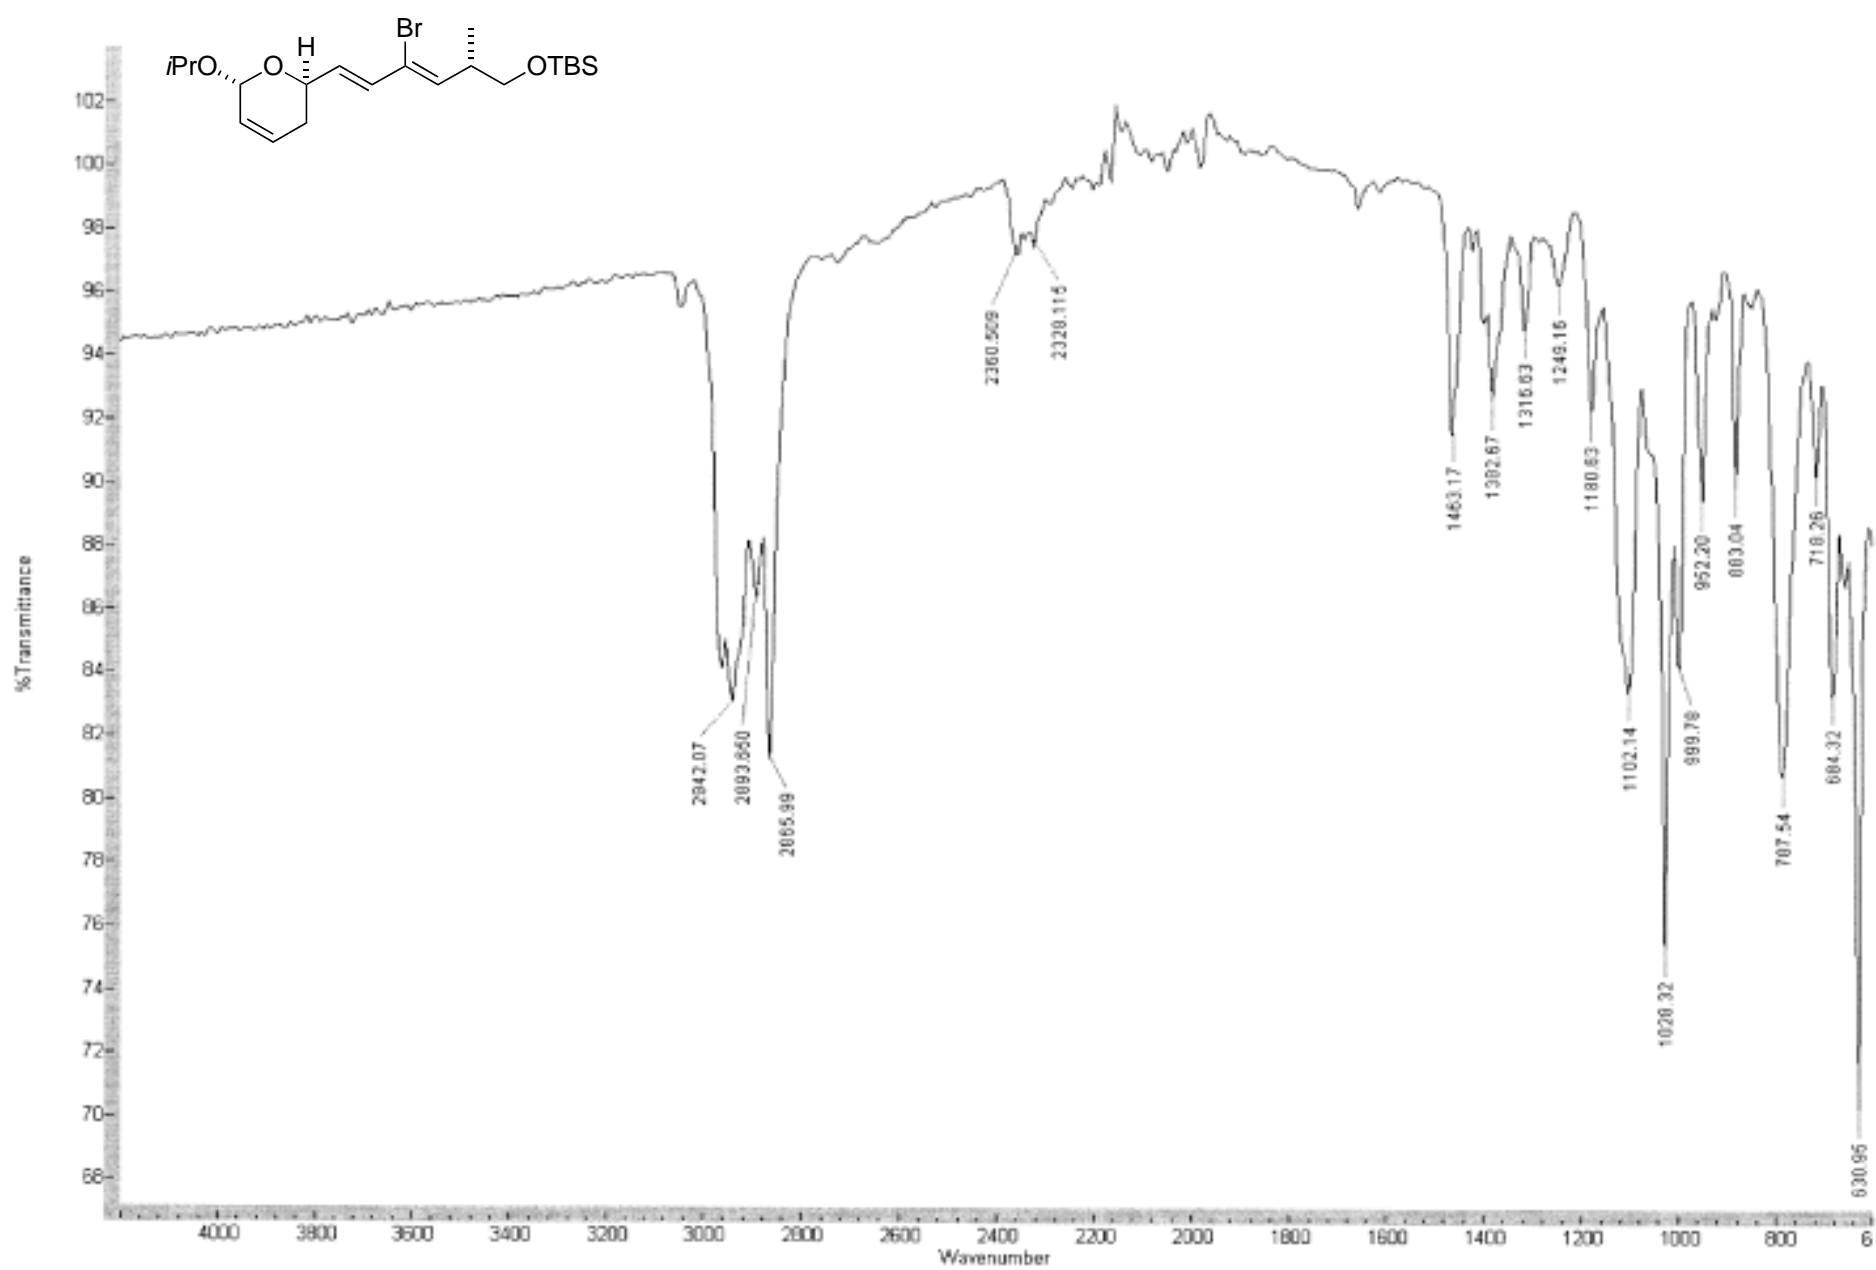

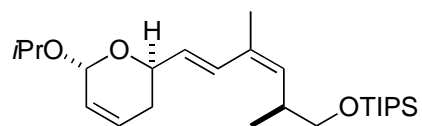

Current Data Parameters  
NAME P0304  
EXPNO 1  
PROCNO 1

F2 - Acquisition Parameters  
Date\_ 20060130  
Time 8:14  
INSTRUM spect  
PROBHD 5 mm BBO 1H-  
PULPROG zgpg30  
TD 50112  
SOLVENT CDCl3  
NS 32  
DS 0  
SHE 8890.615 Hz  
FIDRES 0.189784 Hz  
AQ 5.5689716 sec  
RG 96  
RM 61.800 nsec  
DE 6.00 nsec  
TE 300.0 K  
D1 0.01800000 sec

===== CHANNEL f1 =====  
NUC1 1H  
P1 7.10 nsec  
PL1 -4.00 dB  
SFO1 500.1310100 MHz

F2 - Processing parameters  
SI 65536  
SF 500.1310100 MHz  
WDW no  
SSB 0  
LB 0.00 Hz  
GB 0  
PC 1.80

1D 1H plot parameters  
CX 40.00 cm  
FLP 9.500 ppm  
FI 4750.29 Hz  
F2P -0.300 ppm  
F2 -250.01 Hz  
PRCM 8.25000 ppm/cm  
KDC 125.00750 Hz/cm

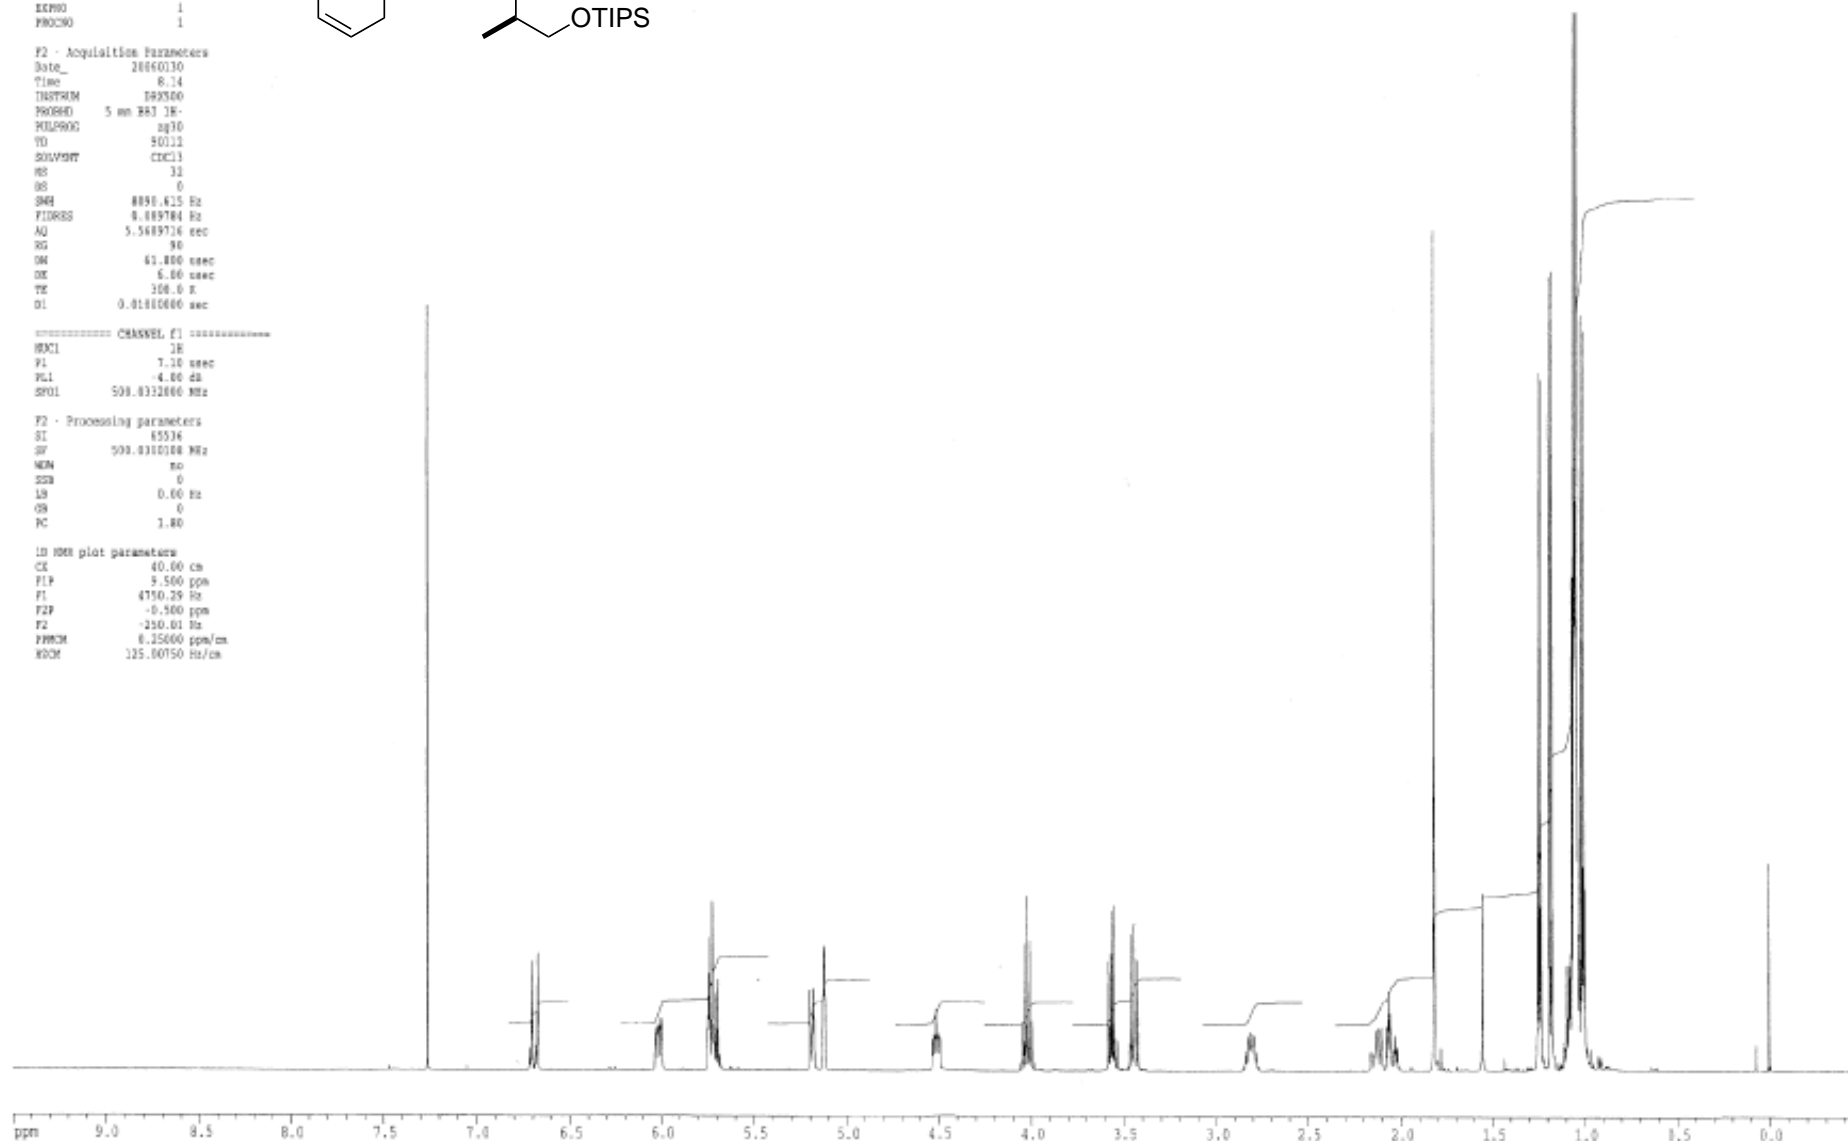

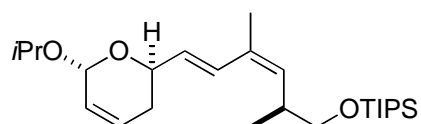

Current Data Parameters  
NAME P0384  
EXPNO 2  
PROCNO 1

## F2 - Acquisition Parameters

Date\_ 20061111  
Time 11.58  
INSTRUM drz2500  
PROBHD 5 mm HNP ss-  
PULPROG zgpg30  
TD 131072  
SOLVENT CDCl3  
NS 2048  
DS 8  
SWH 31152.648 Hz  
FIDRES 0.237676 Hz  
AQ 2.1037557 sec  
RG 13004  
SN 16.050 usec  
DE 30.00 usec  
TE 298.0 K  
D1 0.30000001 sec  
d11 0.03000000 sec  
d12 0.00000000 sec

## ===== CHANNEL f1 =====

NUC1 13C  
P1 9.00 usec  
PL1 0.00 dB  
SFO1 125.7715724 MHz

## ===== CHANNEL f2 =====

CPDPRG2 waltz16  
NUC2 1H  
PCPD2 80.00 usec  
PL2 -5.00 dB  
PL12 13.50 dB  
PL13 15.50 dB  
SFO2 500.1320005 MHz

## F2 - Processing parameters

SI 131072  
SF 125.7577876 MHz  
WDW EM  
SSB 0  
LB 1.00 Hz  
GB 0  
PC 1.40

## 1D 1H NMR plot parameters

CK 40.00 cm  
FIP 232.000 ppm  
FI 29175.81 Hz  
F2P -6.000 ppm  
F2 -1006.06 Hz  
PPMCH 6.00000 ppm/cm  
HSCN 754.54681 Hz/cm

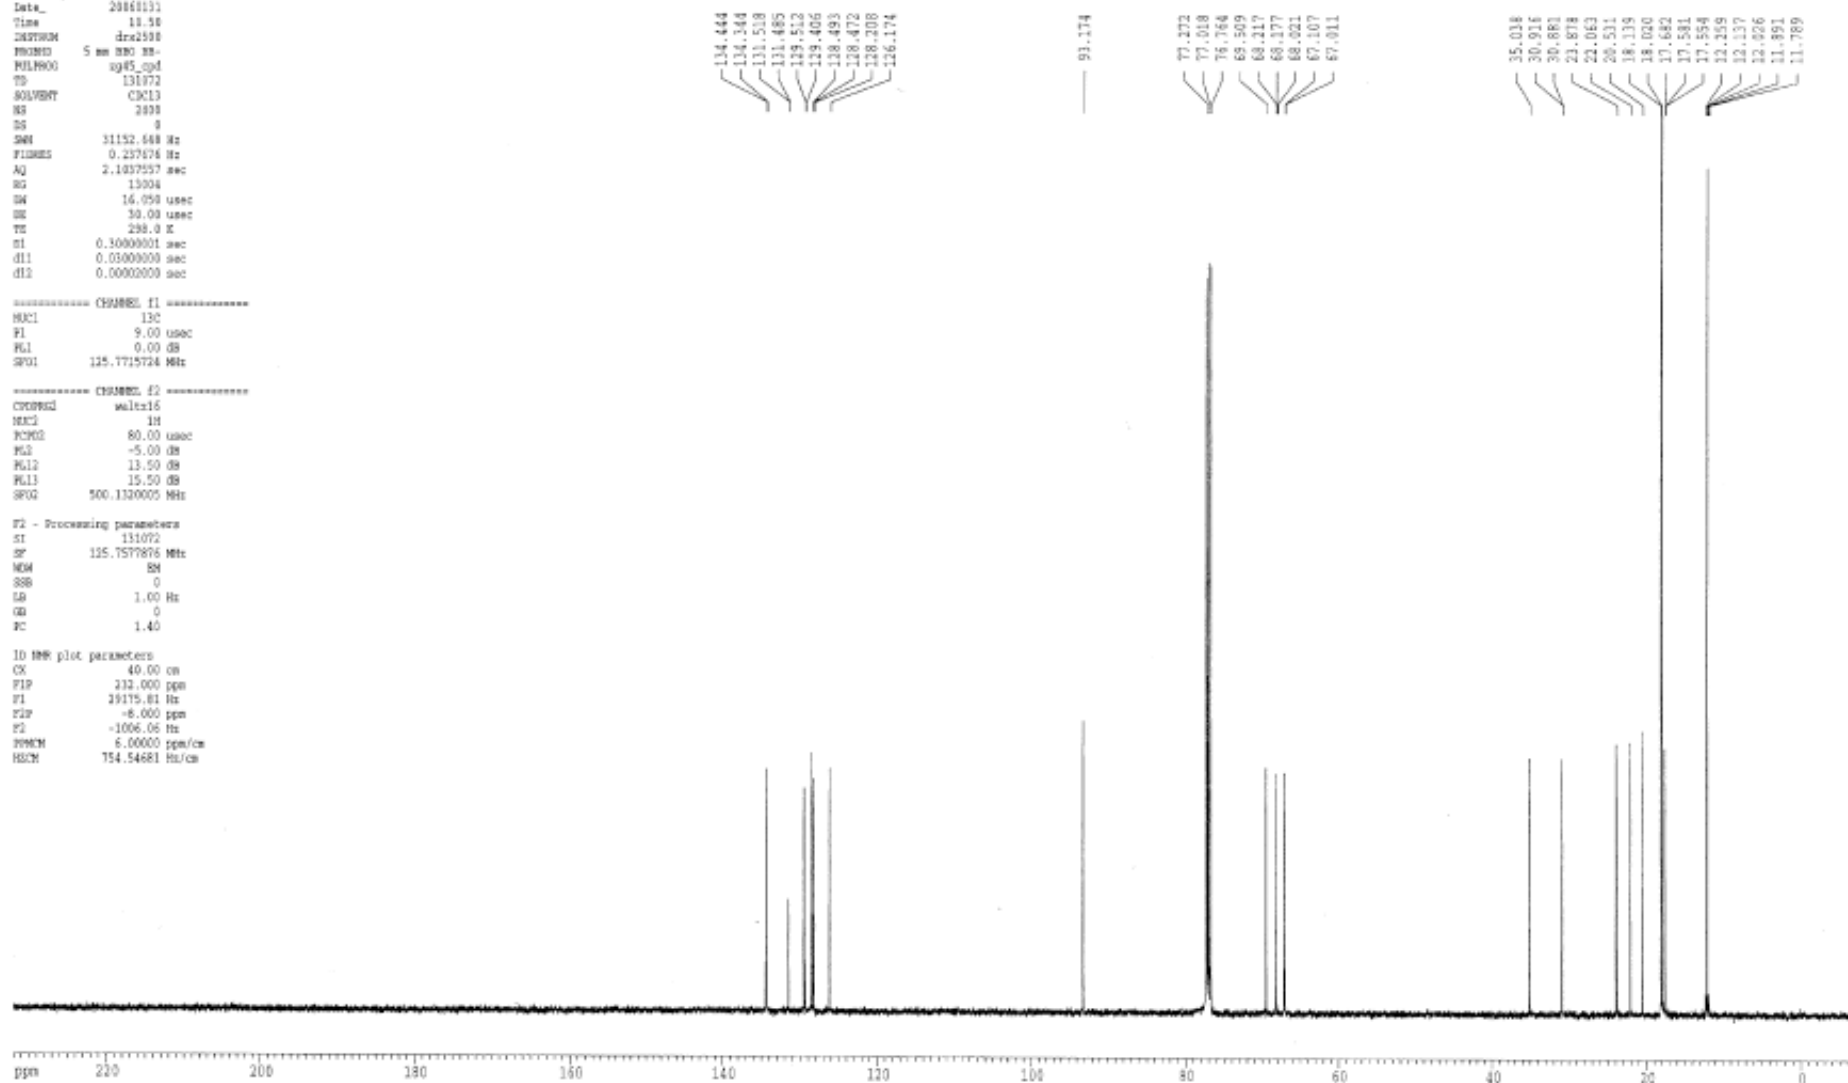

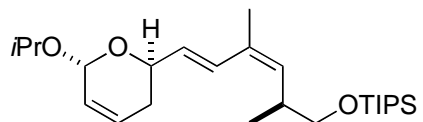

Current Data Parameters  
NAME P0184  
EXPNO 3  
PROCNO 1

F2 - Acquisition Parameters  
Date\_ 20160131  
Time 11.25  
INSTRUM drx250i  
PROBHD 5 mm BBO BB-  
PULPROG zgpg30  
TD 131072  
SOLVENT CDCl3  
NS 512  
DS 0  
SWH 31152.648 Hz  
FIDRES 0.237676 Hz  
AQ 2.1037557 sec  
RG 13804  
RW 16.850 usec  
DE 30.00 usec  
TE 298.0 K  
CMST2 145.000000  
D1 2.0000000 sec  
d2 0.00344828 sec  
d12 0.0002000 sec  
DELTA 0.0001146 sec

===== CHANNEL f1 =====

NUC1 13C  
P1 9.00 usec  
p2 18.00 usec  
PL1 0.00 dB  
SFO1 125.7615724 MHz

===== CHANNEL f2 =====

CPDPRG2 waltz16  
MPC1 1H  
P0 11.00 usec  
P3 11.00 usec  
p4 22.00 usec  
PCPD2 80.00 usec  
PL2 -3.00 dB  
PL12 13.50 dB  
SFO2 500.1320015 MHz

F2 - Processing parameters

SF 65536  
SP 125.7577876 MHz  
WDW EM  
SSB 0  
LB 1.00 Hz  
GB 0  
PC 1.40

1D 2D plot parameters

CX 40.00 cm  
F1P 232.000 ppm  
F1 29175.80 Hz  
F2P -8.000 ppm  
F2 -1016.66 Hz  
SFOCM 6.00000 ppm/cm  
HSCN 754.54675 Hz/cm

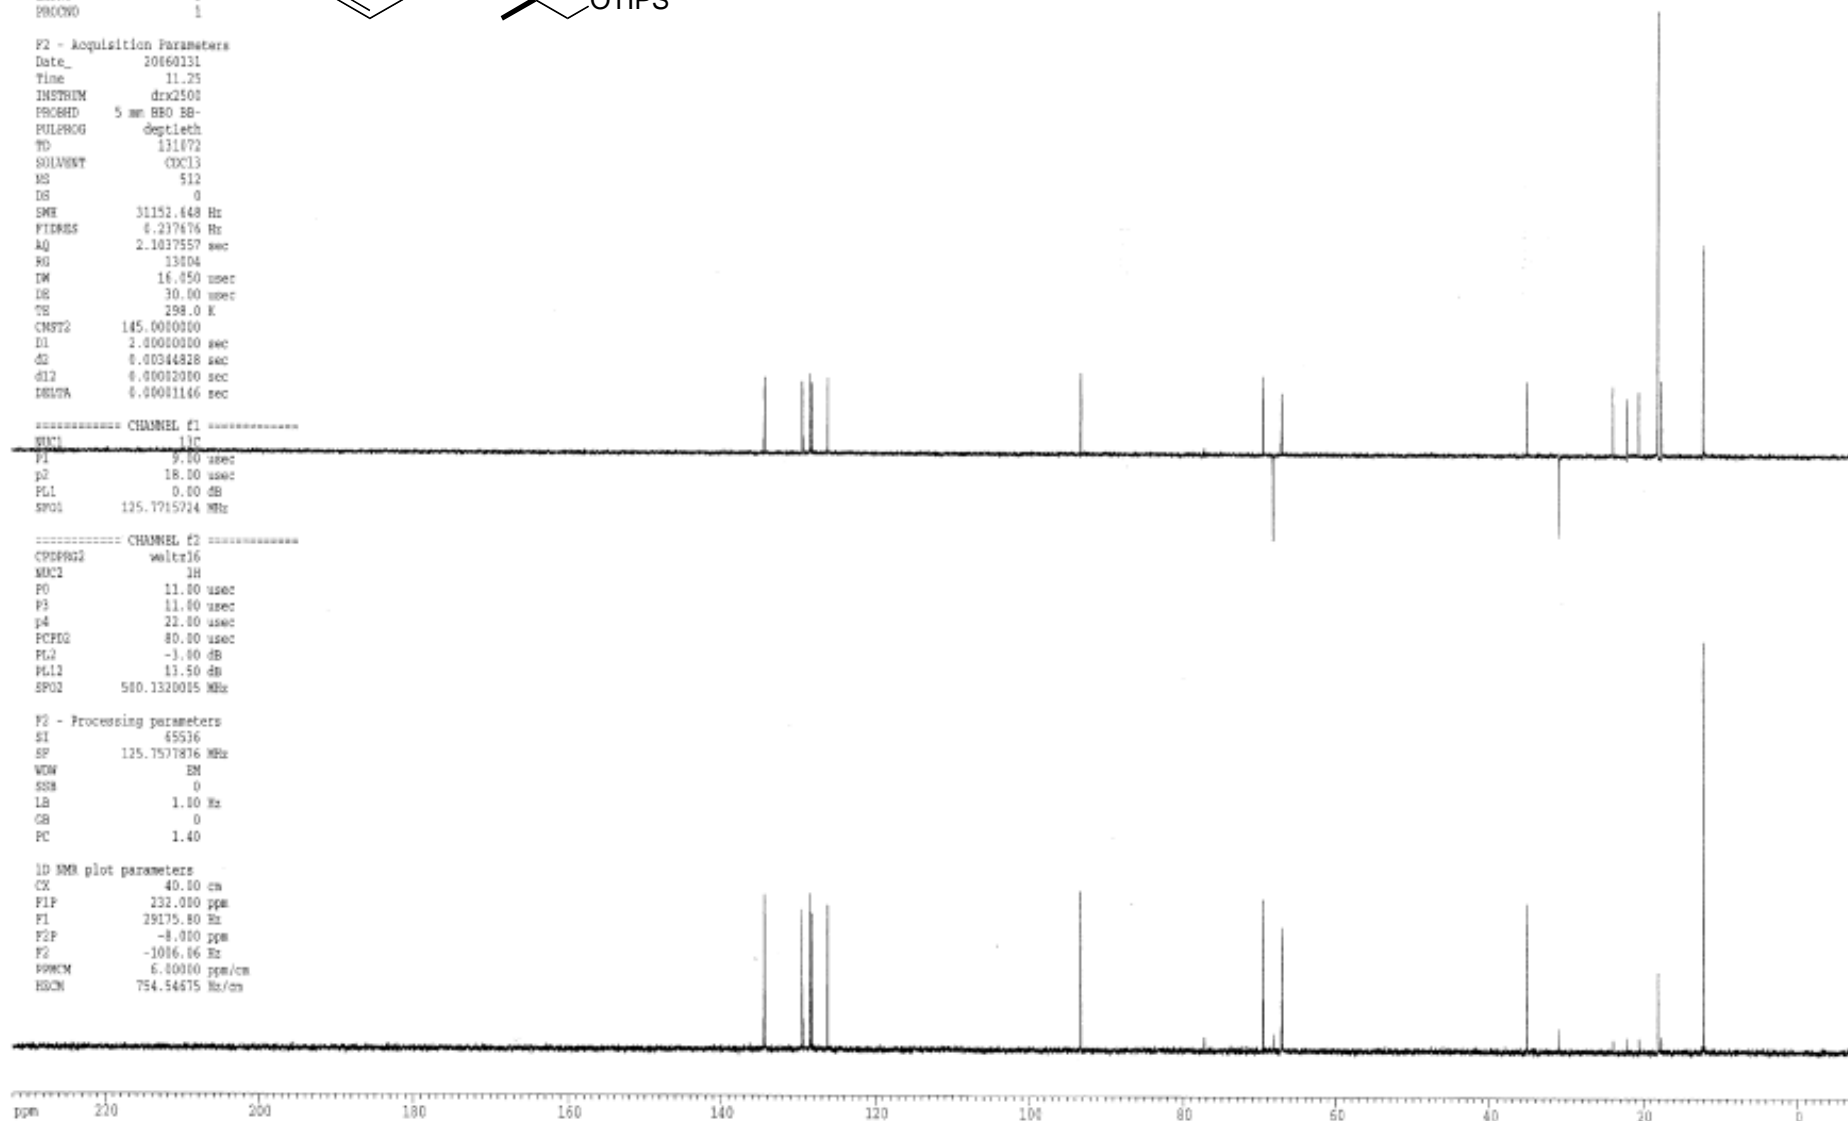



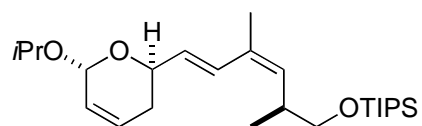

Current Data Parameters  
NAME PR384  
EXPNO 31  
PROCNO 1

F2 - Acquisition Parameters  
Date\_ 20060130  
Time 14.28  
INSTRUM spect  
PROBHD 5 mm BBI 1H-  
PULPROG zgpg30  
TD 50112  
SOLVENT CDCl3  
NS 320  
DS 4  
SWH 8090.625 Hz  
FIDRES 0.000784 Hz  
AQ 5.568716 sec  
RG 360  
AW 61.886 usec  
DE 6.86 usec  
TE 300.2 K  
d1 0.1000000 sec  
d11 0.0300000 sec  
d12 0.0000000 sec  
d20 0.0700000 sec  
t4 30  
WAC1 1H  
P1 7.10 usec  
PL1 -4.00 dB  
SFO1 500.000000 MHz  
FQ1LIST 8211at.3  
RG2 1H  
RG2 120.00 dB  
PL14 74.00 dB  
SFO2 500.000000 MHz

F2 - Processing parameters  
SI 65536  
SF 500.000000 MHz  
WDW EM  
SSB 0  
LB 0.60 Hz  
GB 0  
PC 1.00

1D NMR plot parameters  
CH 40.86 cm  
P17 9.580 ppm  
P1 4750.29 Hz  
P27 -9.580 ppm  
P2 -258.01 Hz  
PPM0 0.25000 ppm/cm  
RDCM 125.00750 Hz/cm

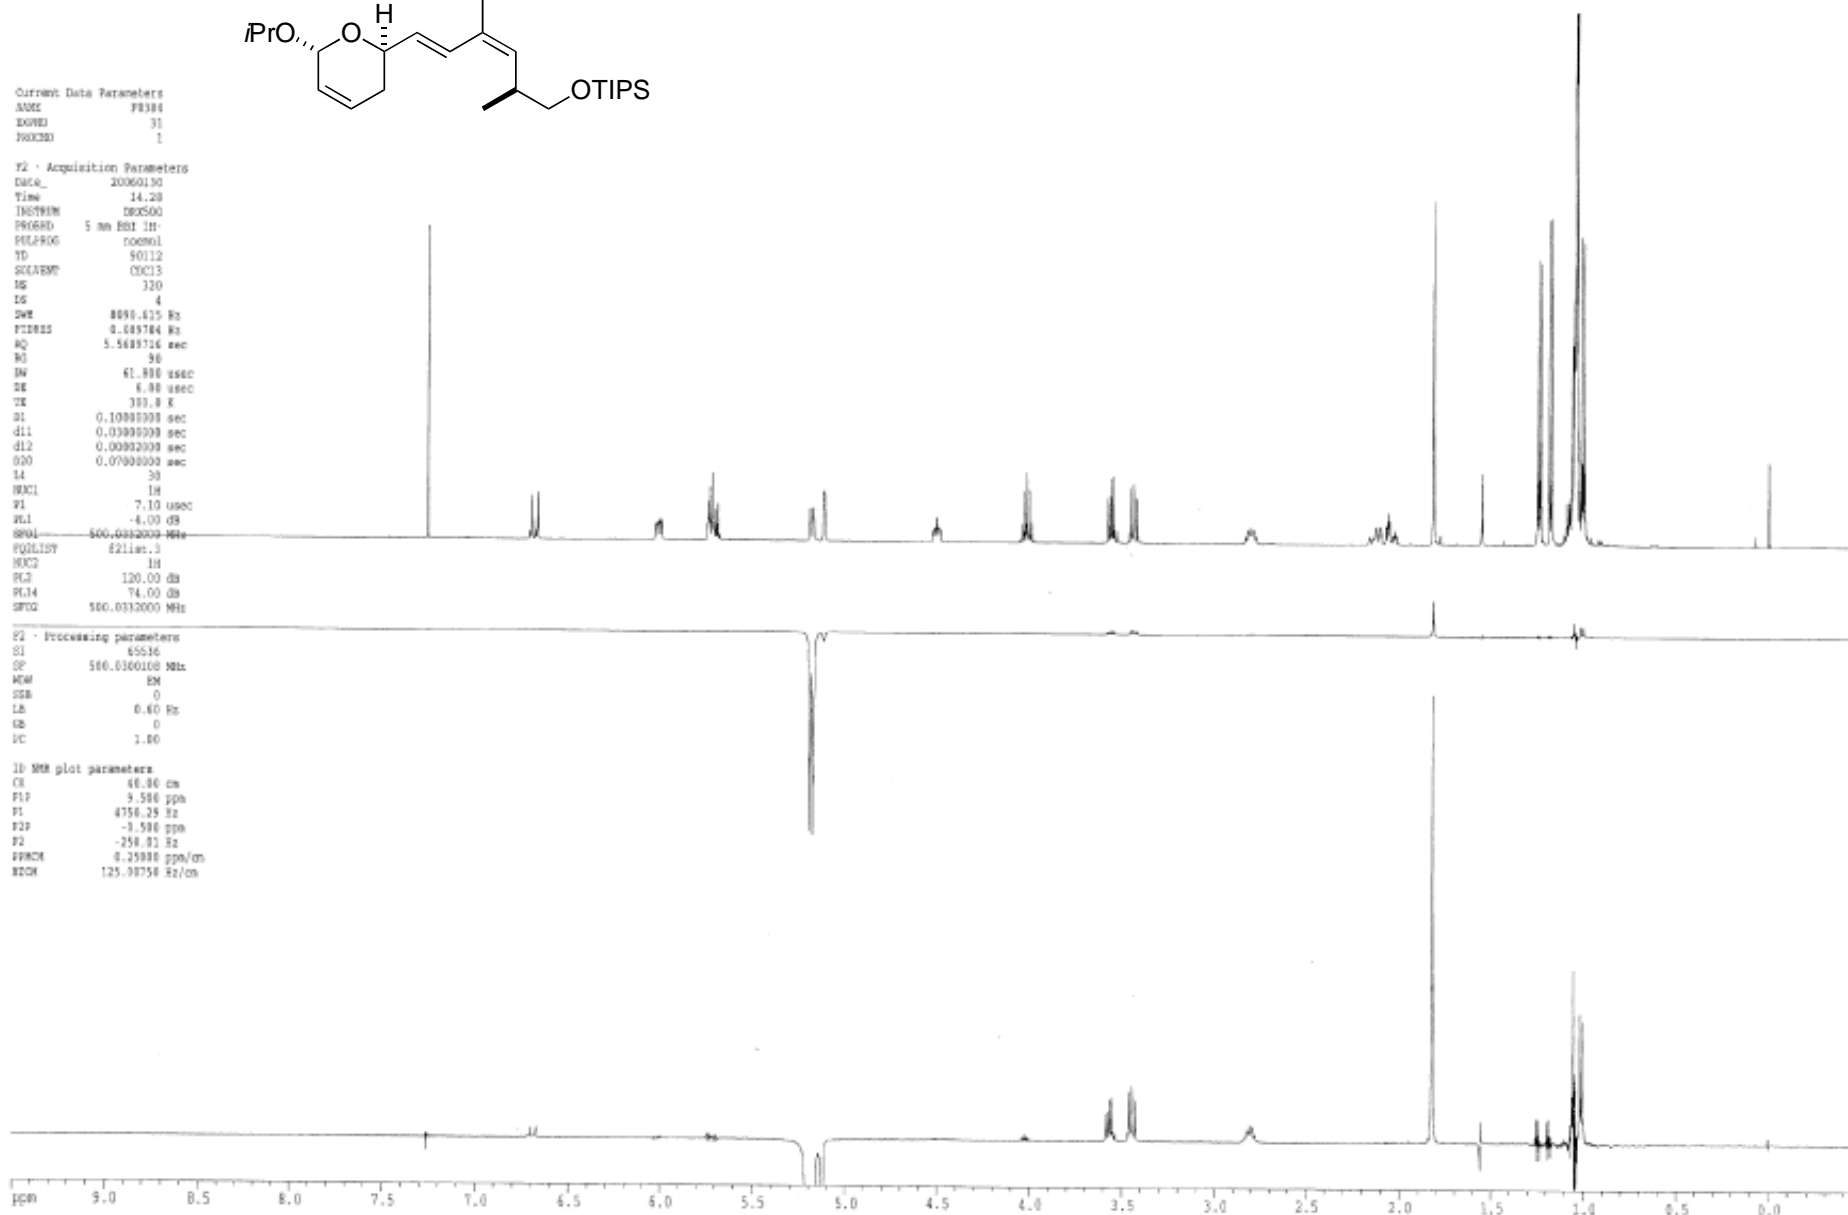

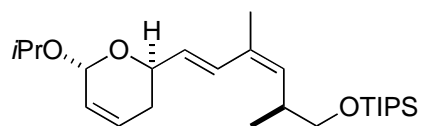

Current Data Parameters  
NAME F0304  
EXPNO 32  
PROCNO 1

F2 - Acquisition Parameters

Date\_ 20060110  
Time 14.11  
INSTRUM spect  
PROBHD 5 mm BBO 1H-  
PULPROG zgpg30  
TD 65536  
SOLVENT CDCl3  
NS 320  
DS 4  
SWH 8998.615 Hz  
FIDRES 0.089784 Hz  
AQ 5.5689716 sec  
RG 50  
DW 61.800 nsec  
DE 6.00 nsec  
TE 300.2 K  
DQ 0.10000000 sec  
d11 0.03000000 sec  
d12 0.03000000 sec  
D20 0.07000000 sec  
LA 30  
NUC1 1H  
P1 7.10 nsec  
PL1 -4.00 dB  
PRF 500.0332000 MHz  
PQ2LST F231st.4  
RG2 30  
RG2 320.00 dB  
RG2 74.00 dB  
RG2 500.0332000 MHz

F2 - Processing parameters

SI 65536  
SF 500.0300100 MHz  
WDW EM  
SSB 0  
LB 0.60 Hz  
GB 0  
PC 1.00

1b MMR plot parameters

CS 40.00 cm  
F1P 9.500 ppm  
F2 4750.29 Hz  
F3P -0.500 ppm  
F2 -250.01 Hz  
FPMCH 0.25000 ppm/cm  
HZCH 125.80750 Hz/cm

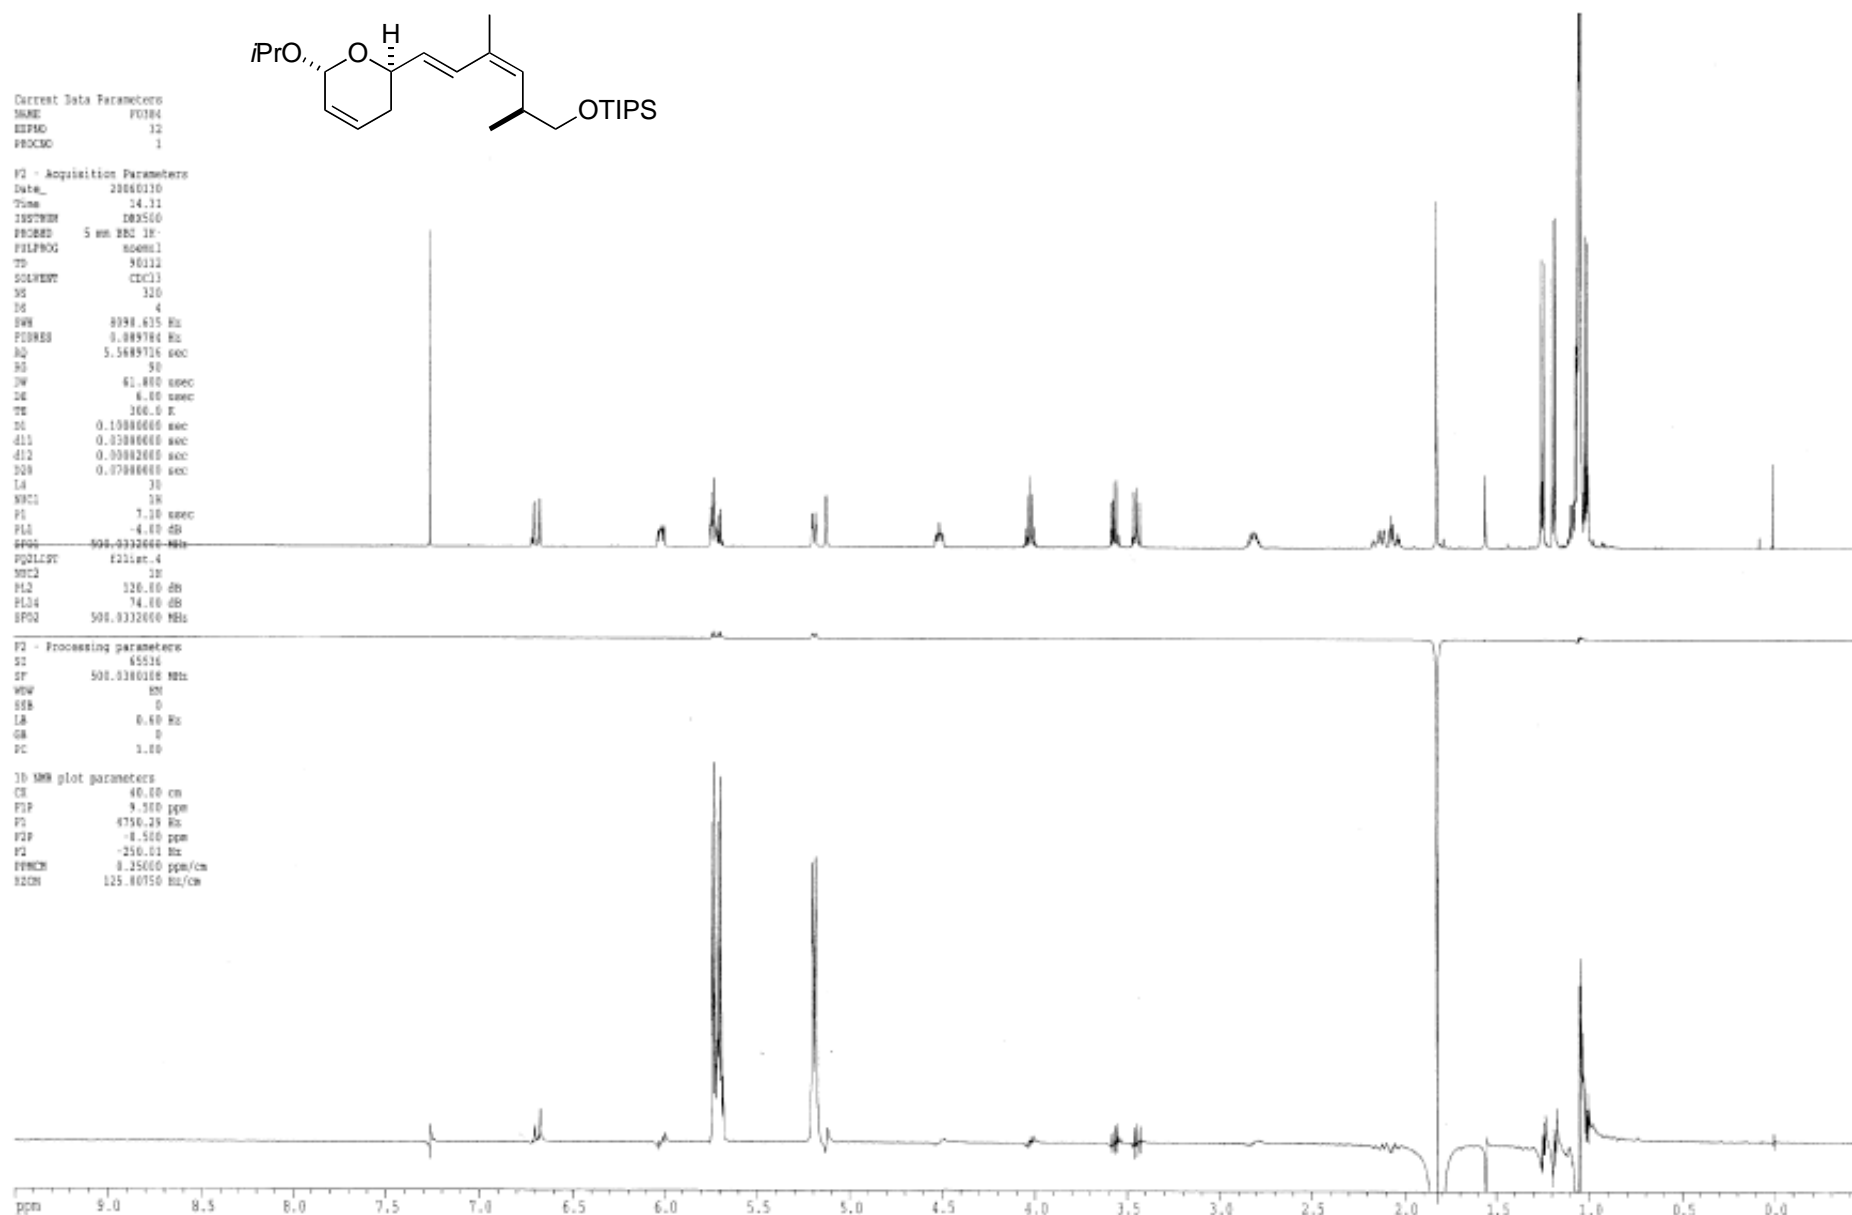

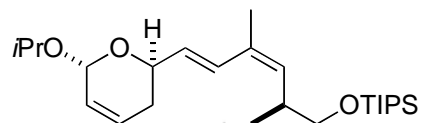

Current Data Parameters  
NAME PR384  
EXPNO 38  
PROCNO 1

F2 - Acquisition Parameters  
Date\_ 20060130  
Time 14.26  
INSTRUM spect  
PROBHD 5 mm BBI 1H-  
PULPROG zgpg30  
TD 90112  
SOLVENT CDCl3  
NS 320  
DS 4  
SWH 8090.615 Hz  
FIDRES 0.089784 Hz  
AQ 5.5689716 sec  
RG 90  
DM 61.800 cmec  
DE 6.00 cmec  
TE 300.0 K  
D1 0.10000000 sec  
D11 0.01000000 sec  
D12 0.00000000 sec  
D13 0.07000000 sec  
L4 10  
SFO 1H  
P1 7.10 cmec  
PL1 -4.00 dB  
PR2 560.012000 MHz  
RG2 2  
SFO2 1H  
PL2 120.00 dB  
PL14 14.00 dB  
SFO2 560.012000 MHz

F2 - Processing parameters  
SI 65536  
SF 560.012000 MHz  
WDW EM  
SSB 0  
LB 0.60 Hz  
GB 0  
PC 1.00

1D 1H plot parameters  
CE 40.00 cm  
F1P 9.500 ppm  
F1 4750.29 Hz  
F2P -0.500 ppm  
F2 -250.01 Hz  
P1PCW 0.25000 ppm/cm  
PCW 125.00710 Hz/cm

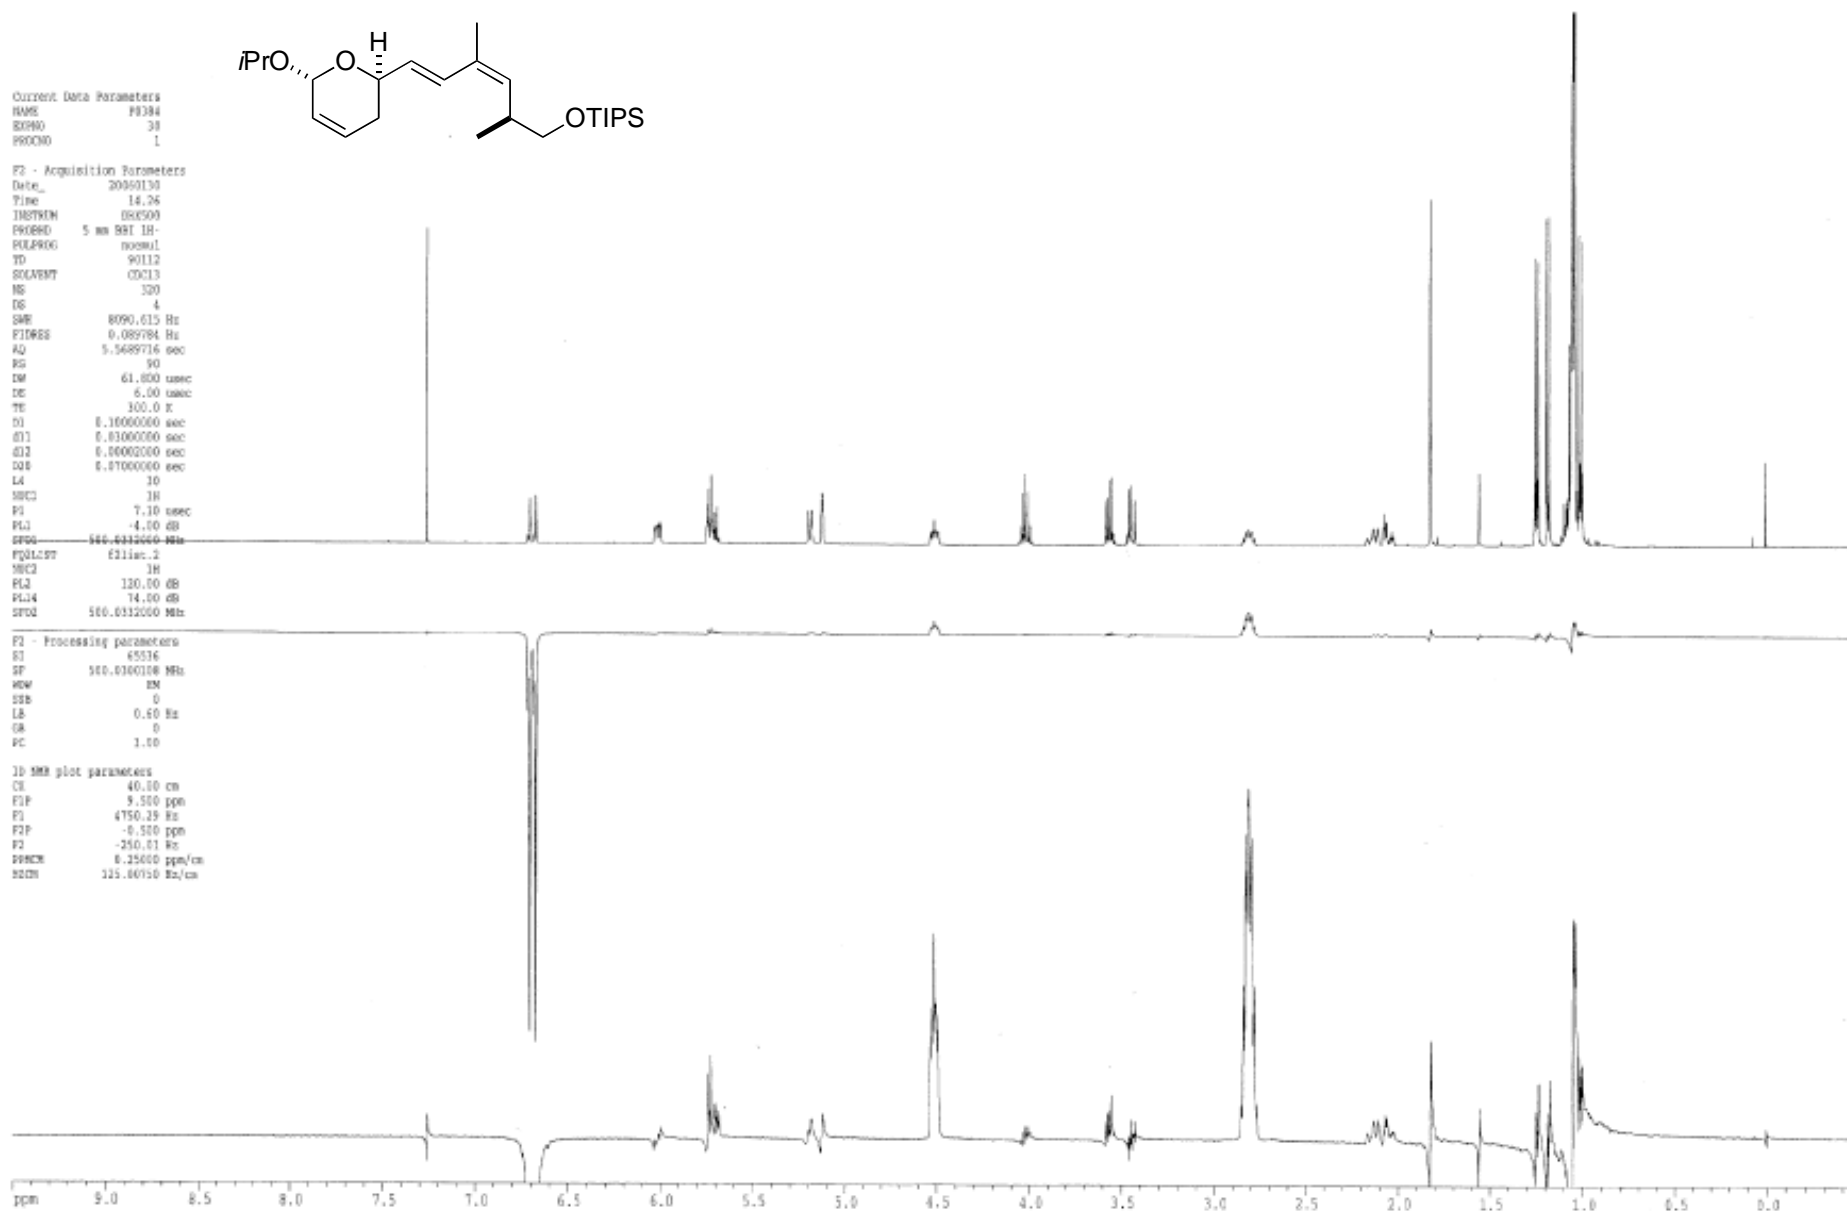

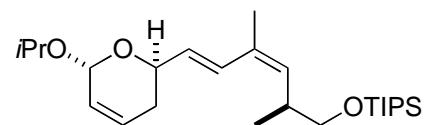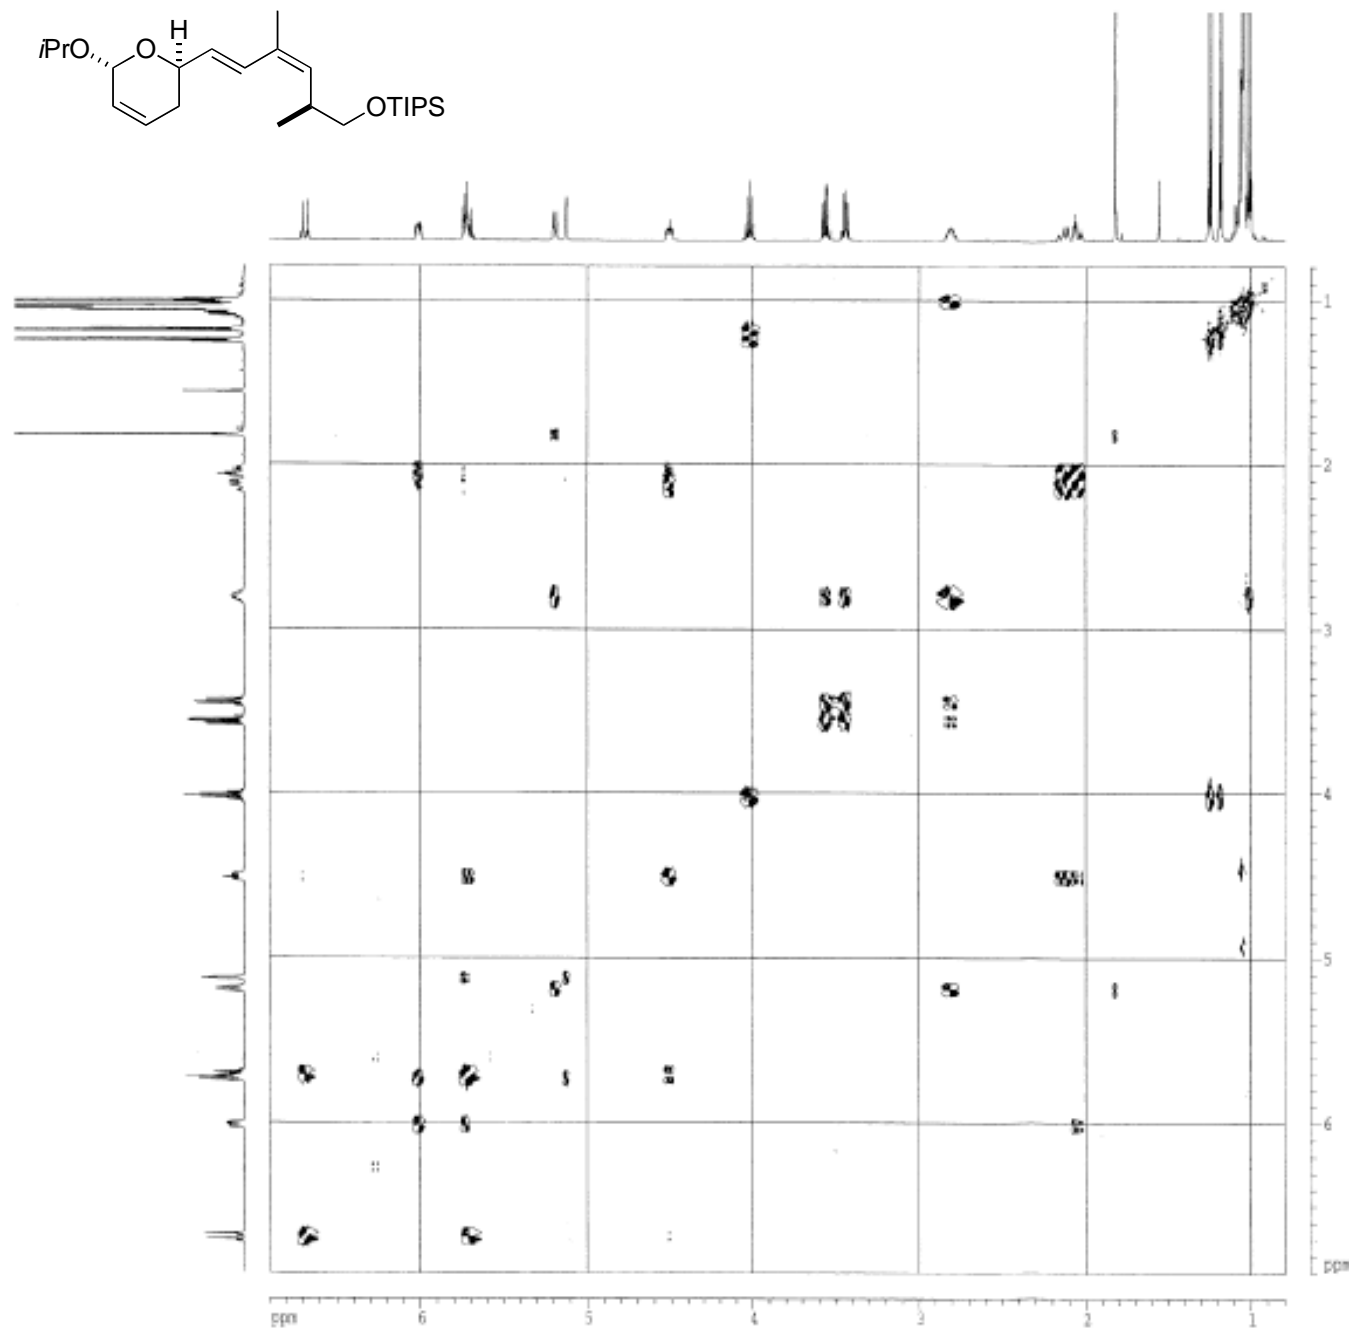

Current Data Parameters

NAME: P1564  
EXPNO: 18  
PROCNO: 3

F2 - Acquisition Parameters

Date\_: 2008118  
Time: 8.35  
INSTRUM: QNP500  
PROBHD: 5 mm BBO 1H-  
PULPROG: zgpg30  
TD: 2048  
SOLVENT: DMSO  
NS: 4  
DS: 16  
SWH: 4456.403 Hz  
FIDRES: 2.195569 Hz  
AQ: 0.2277876 sec  
RG: 6096  
DM: 111.388 cm/s  
DE: 8.83 cm/s  
TE: 300.2 K  
DQ: 0.8060161 sec  
DT: 2.8060000 sec  
d11: 0.8160000 sec  
d12: 0.8060000 sec  
d13: 0.8060161 sec  
d16: 0.8061500 sec  
d20: 0.8021510 sec  
IM0: 0.8061113 sec

===== CHANNEL F1 =====

NUC1: 13  
P1: 7.10 cm/s  
PC1: 16.38 cm/s  
PL1: -4.00 dB  
RG1: 8.00 cm  
SFO1: 500.013918 MHz

===== CHANNEL F2 =====

CHM01: sine,100  
CHM02: sine,100  
GPR1: 8.00 %  
GPR2: 8.00 %  
GPR3: 8.00 %  
GPR4: 8.00 %  
GPR5: 15.00 %  
GPR6: 18.00 %  
P16: 2000.00 cm/s

F1 - Acquisition parameters

NS0: 2  
DS: 512  
SFO1: 500.8318 MHz  
FIDRES: 8.782017 Hz  
AQ: 8.992 sec

F2 - Processing parameters

SI: 32768  
SF: 500.8308108 MHz  
WDW: EM  
SSB: 1  
LB: 8.00 Hz  
GB: 0  
PC: 1.00

F1 - Processing parameters

SI: 32768  
SF: 500.8308108 MHz  
WDW: EM  
SSB: 2  
LB: 8.00 Hz  
GB: 0

2D 1H/13C plot parameters

CE1: 16.00 cm  
CE2: 16.00 cm  
F2P10: 6.907 ppm  
F2P11: 3851.67 Hz  
F2P12: 0.795 ppm  
F2P13: 397.32 Hz  
F2P14: 6.907 ppm  
F2P15: 3851.67 Hz  
F2P16: 0.795 ppm  
F2P17: 397.32 Hz  
F2P18: 6.9060 ppm/cm  
F2P19: 112.80763 Hz/cm  
F2P20: 6.9060 ppm/cm

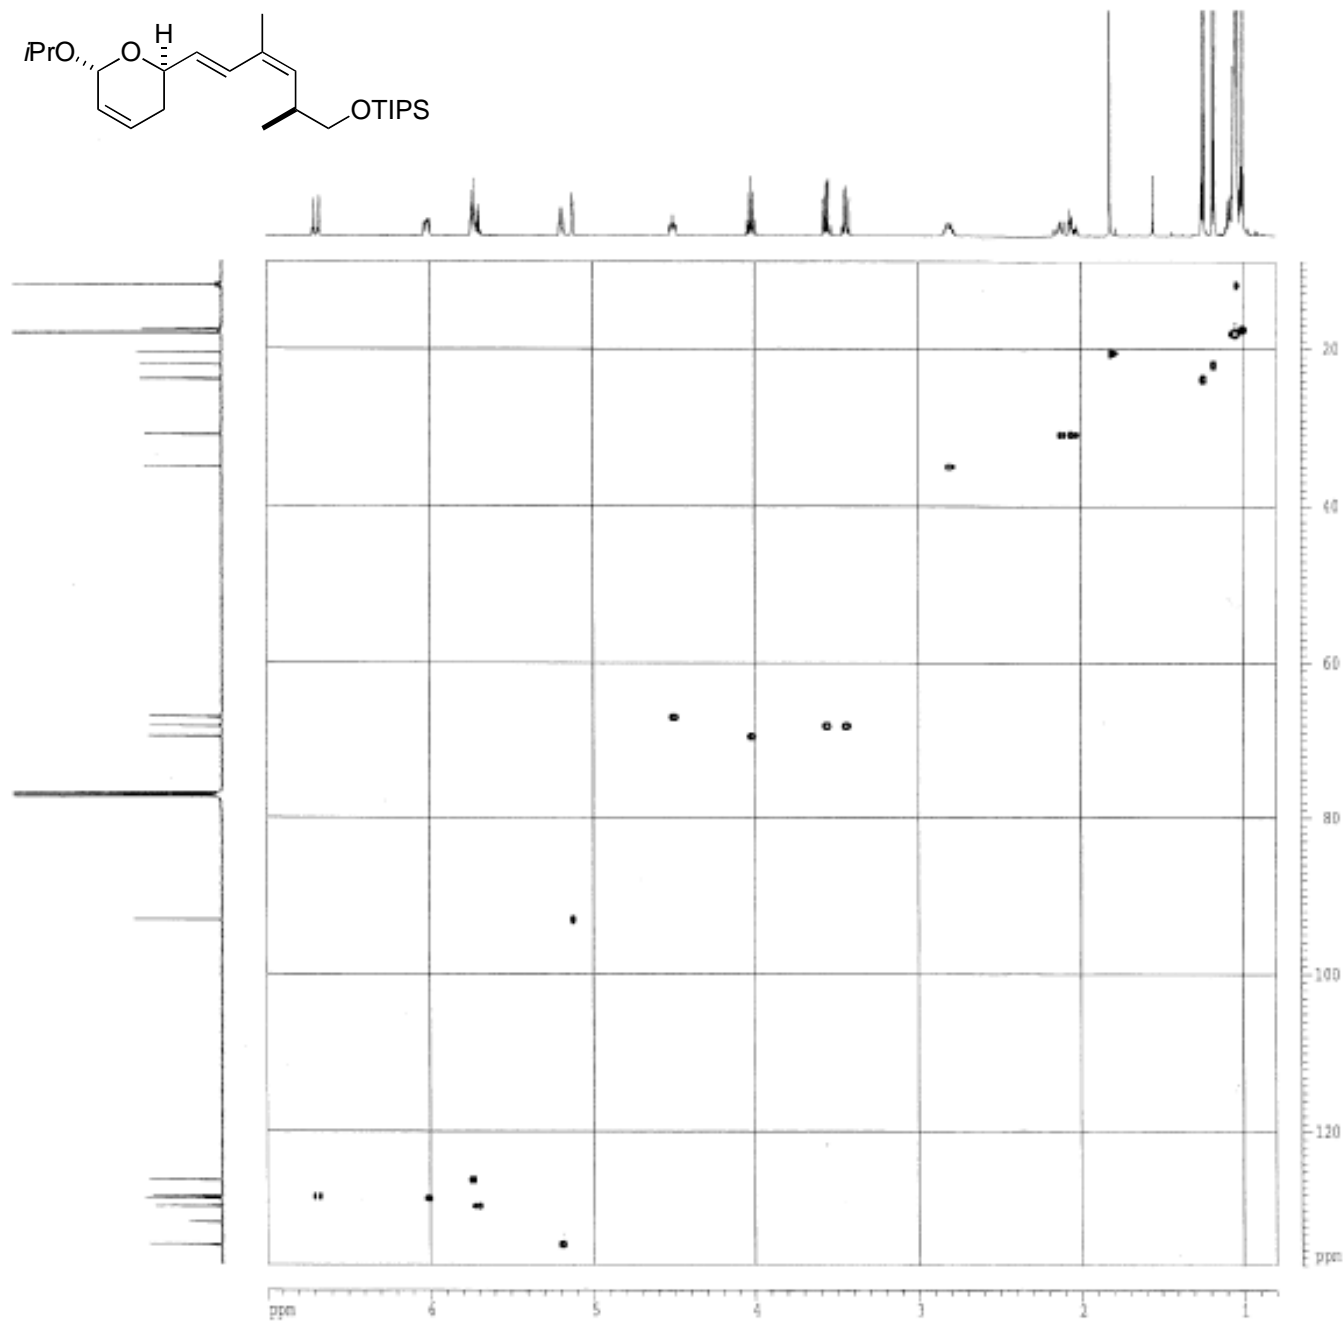

| 20 000 plot parameters |                |
|------------------------|----------------|
| CSE                    | 20.00 cm       |
| CEI                    | 20.00 cm       |
| FIB01                  | 7.400 ppm      |
| FIB2                   | 35.00-21.00    |
| FIB3                   | 8.400 ppm      |
| FIB4                   | 4.00-12.00     |
| FIB5                   | 157.000 ppm    |
| FIB6                   | 17.228.37 kg   |
| FIB7                   | 9.200 ppm      |
| FIB8                   | 11.71.55 kg    |
| FIB9C01                | 6.21000 ppm/cm |
| FIB9C2                 | 156.0000 kg/cm |
| FIB9C3                 | 4.00000 mm/cm  |

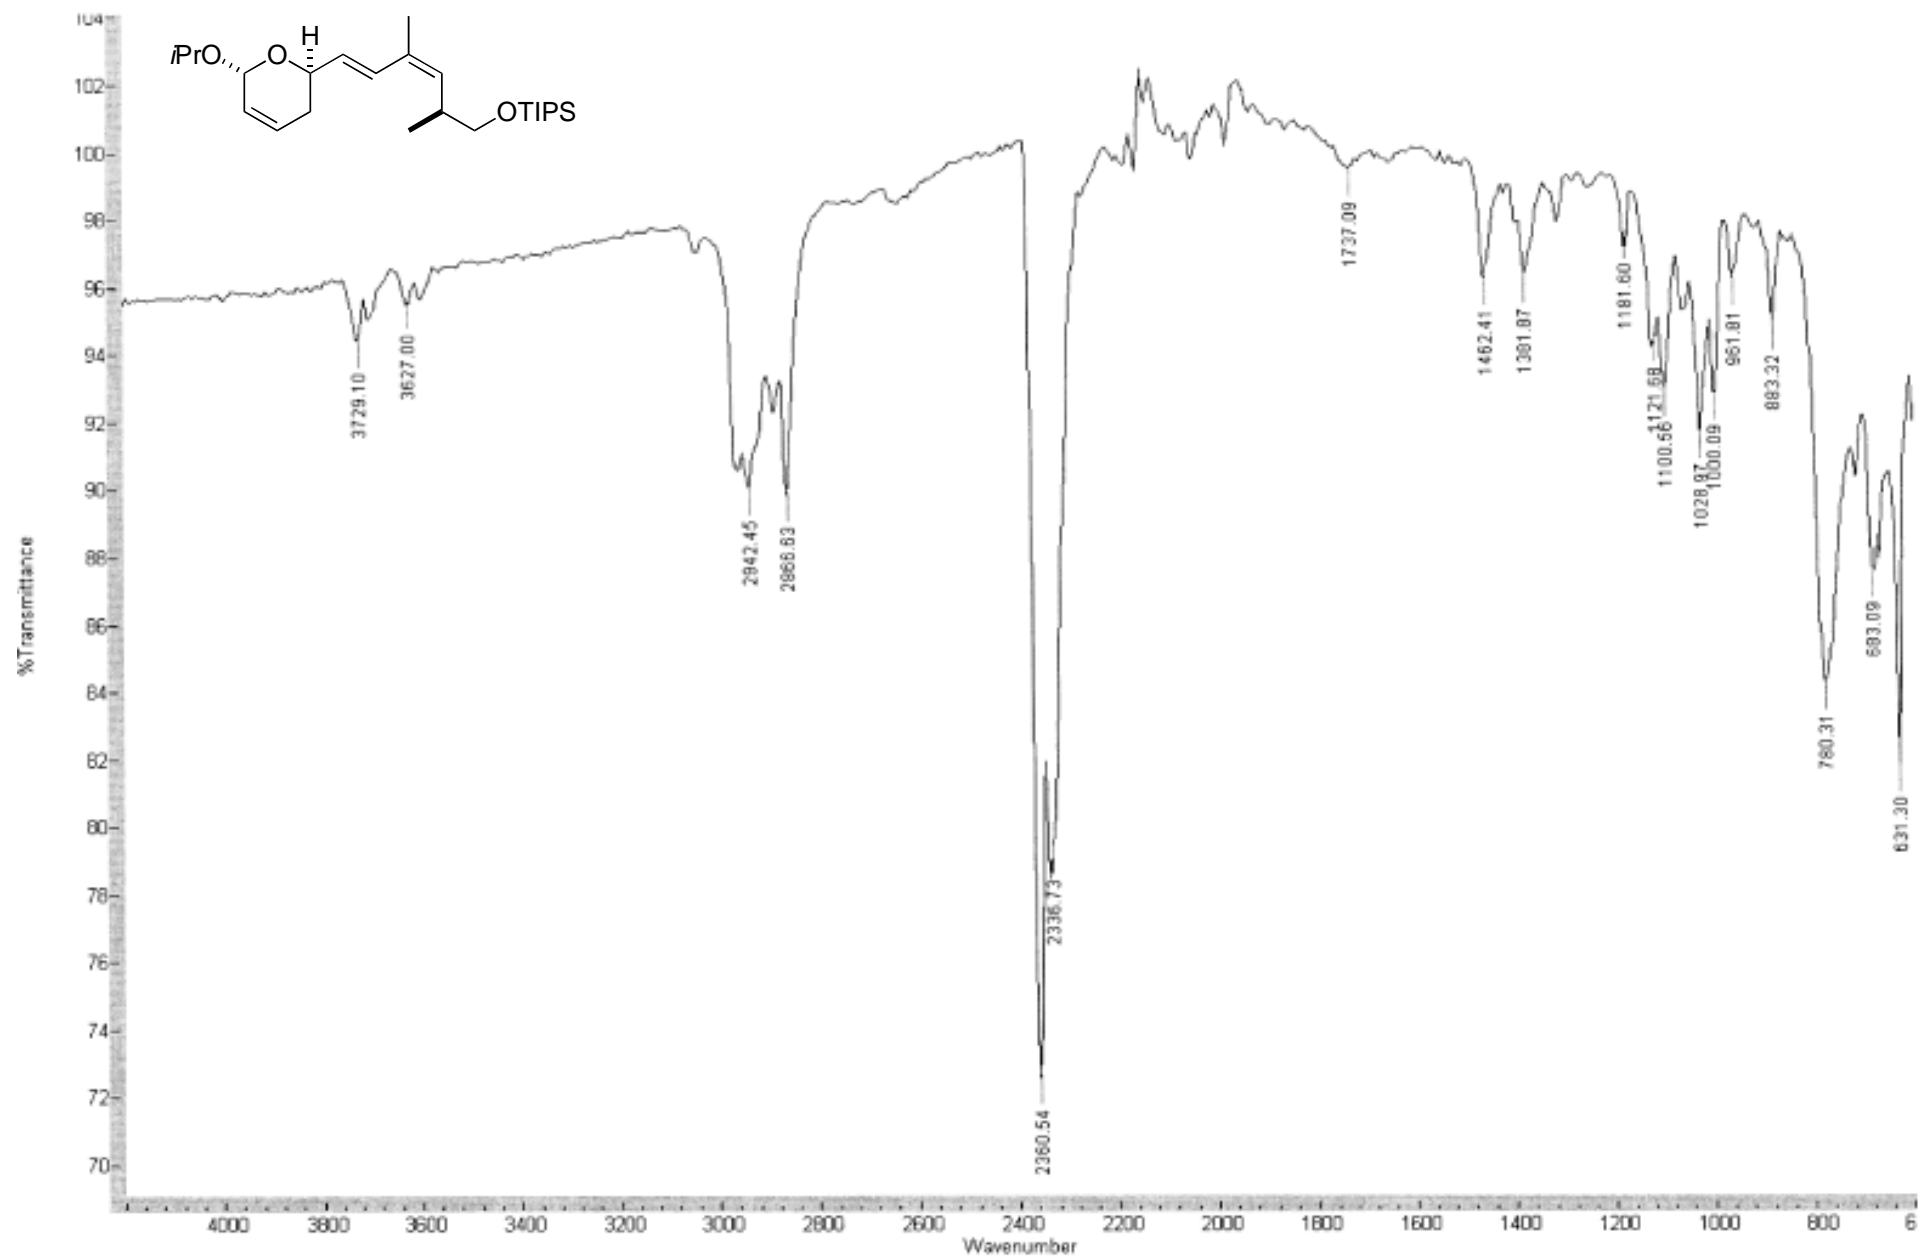

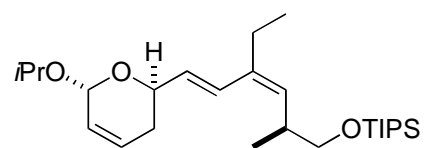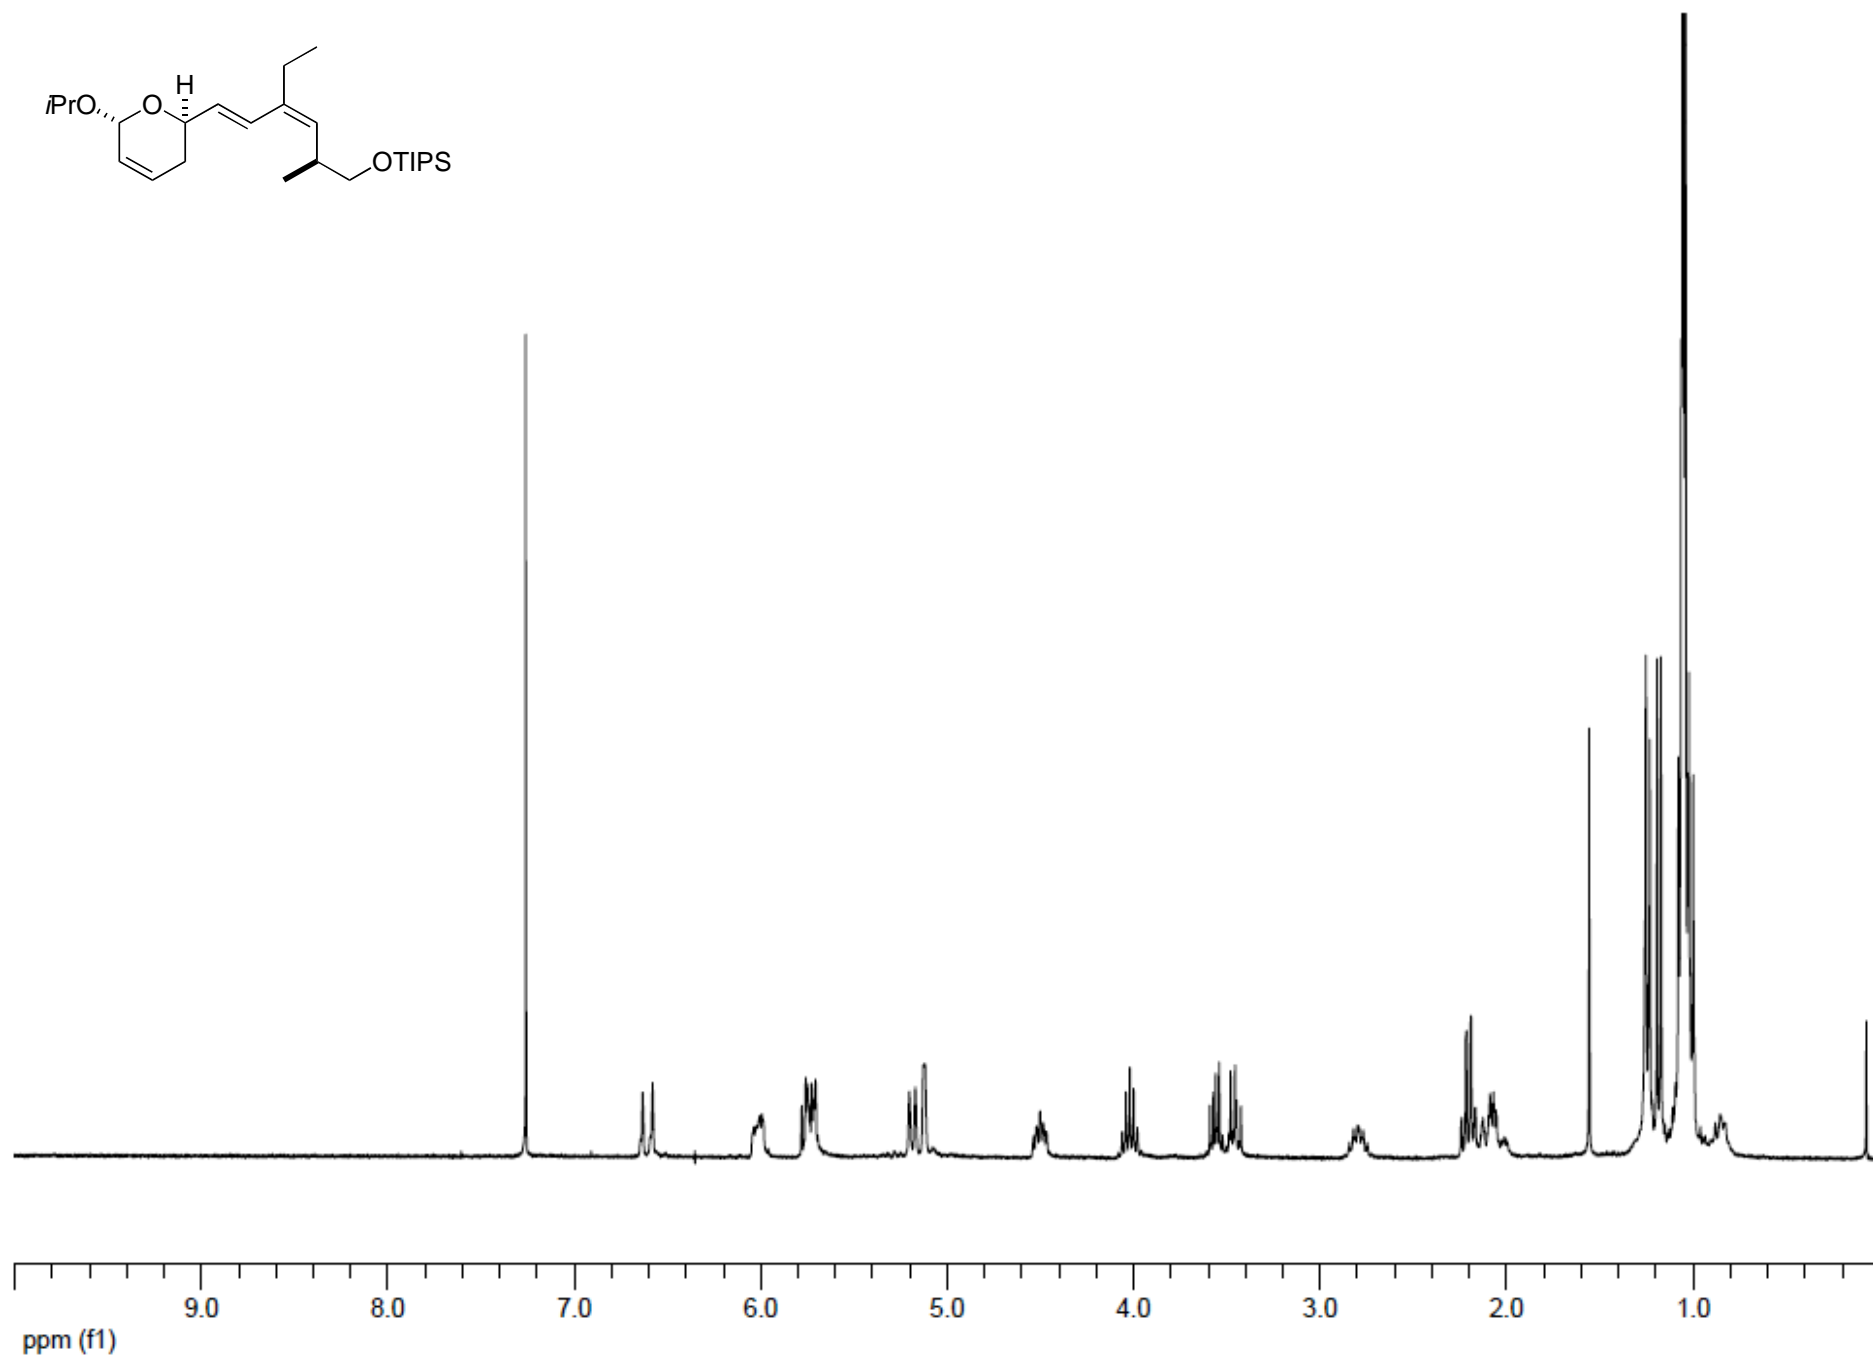

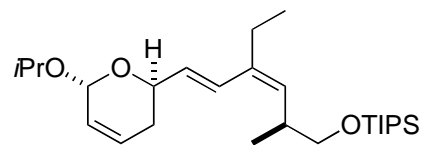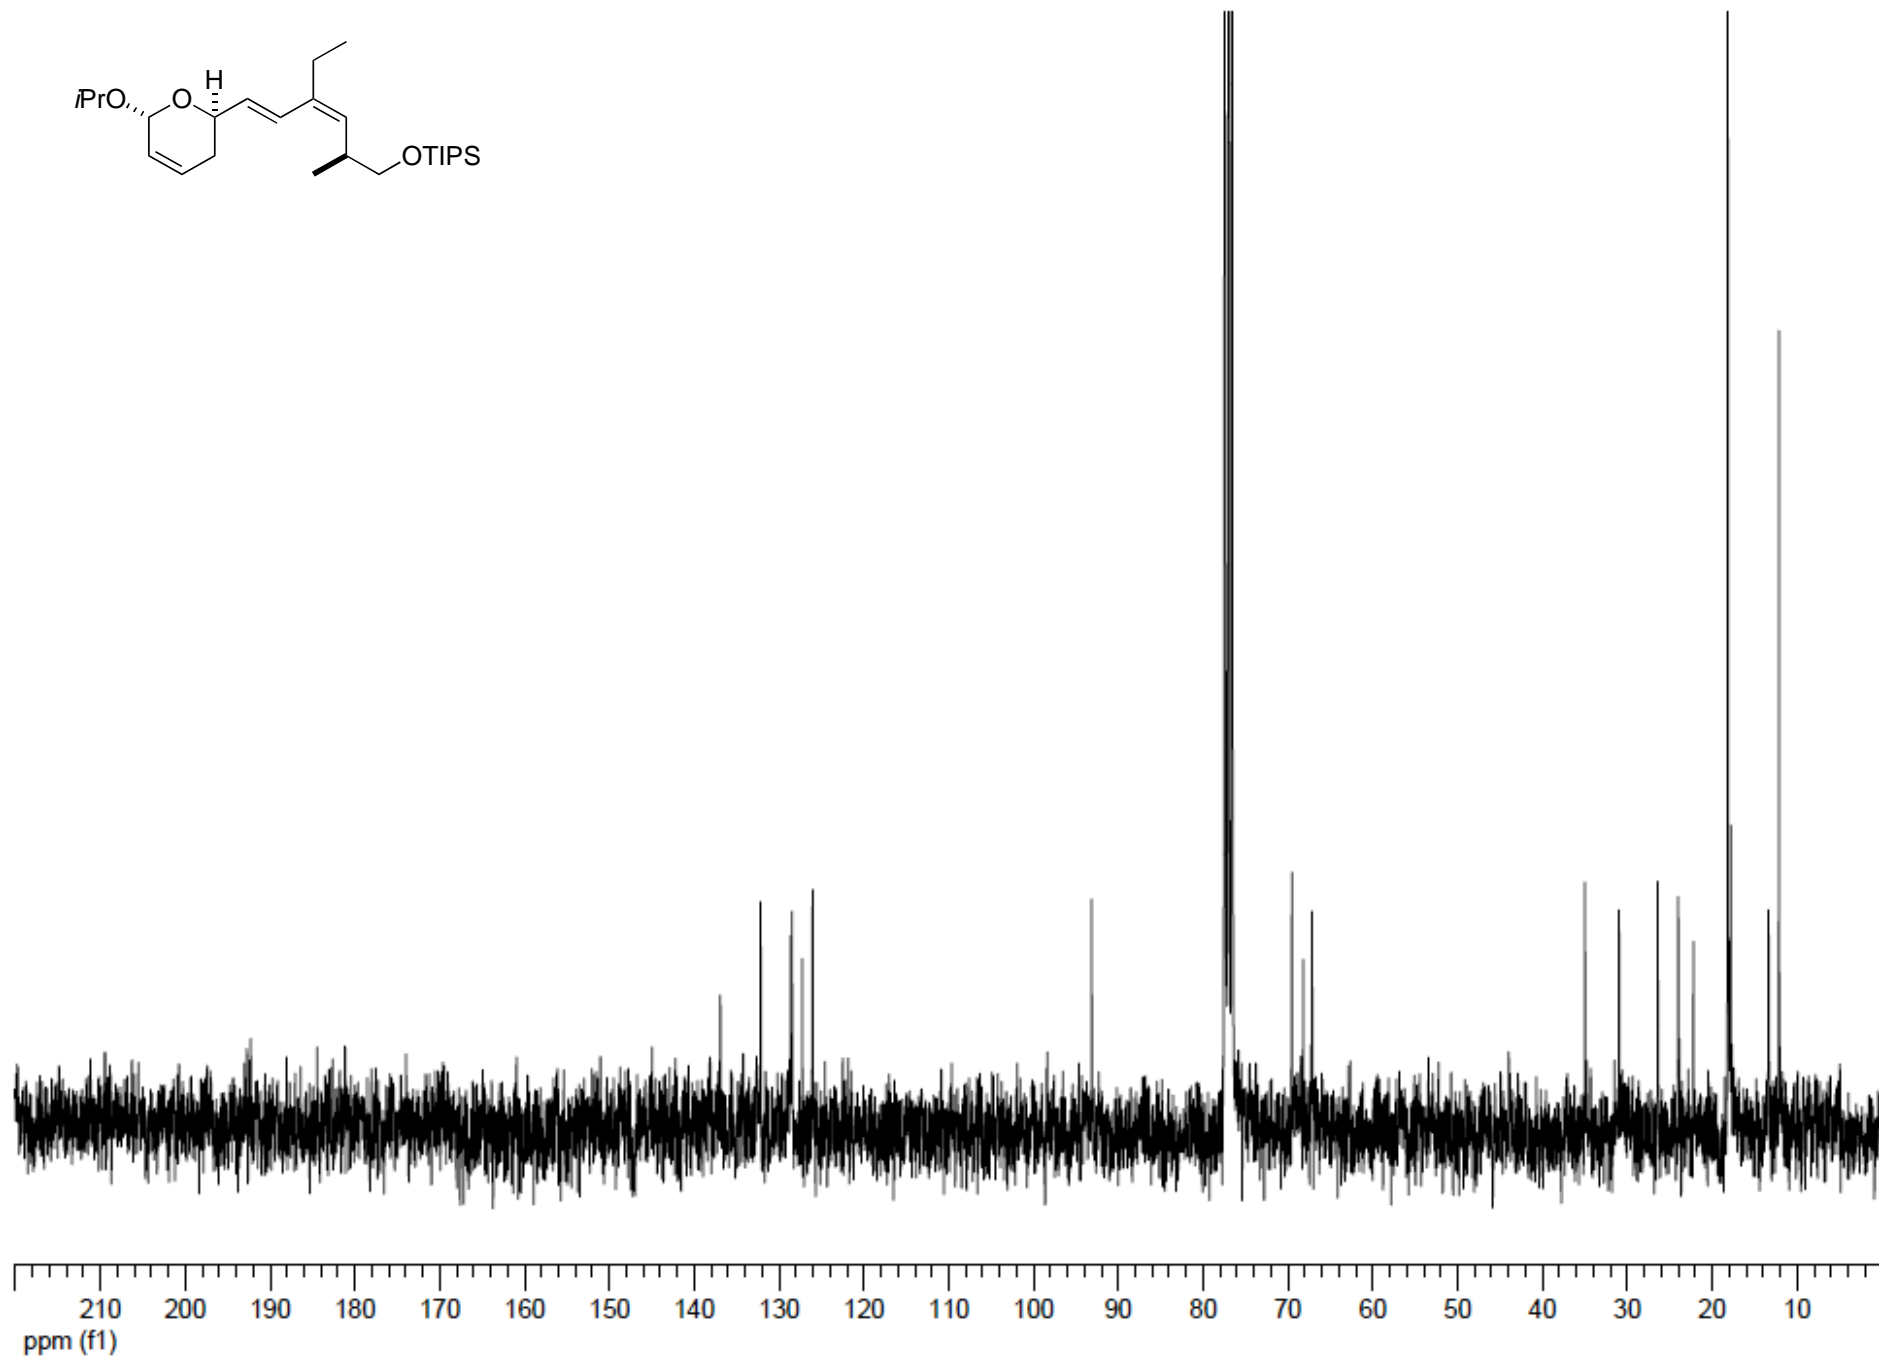



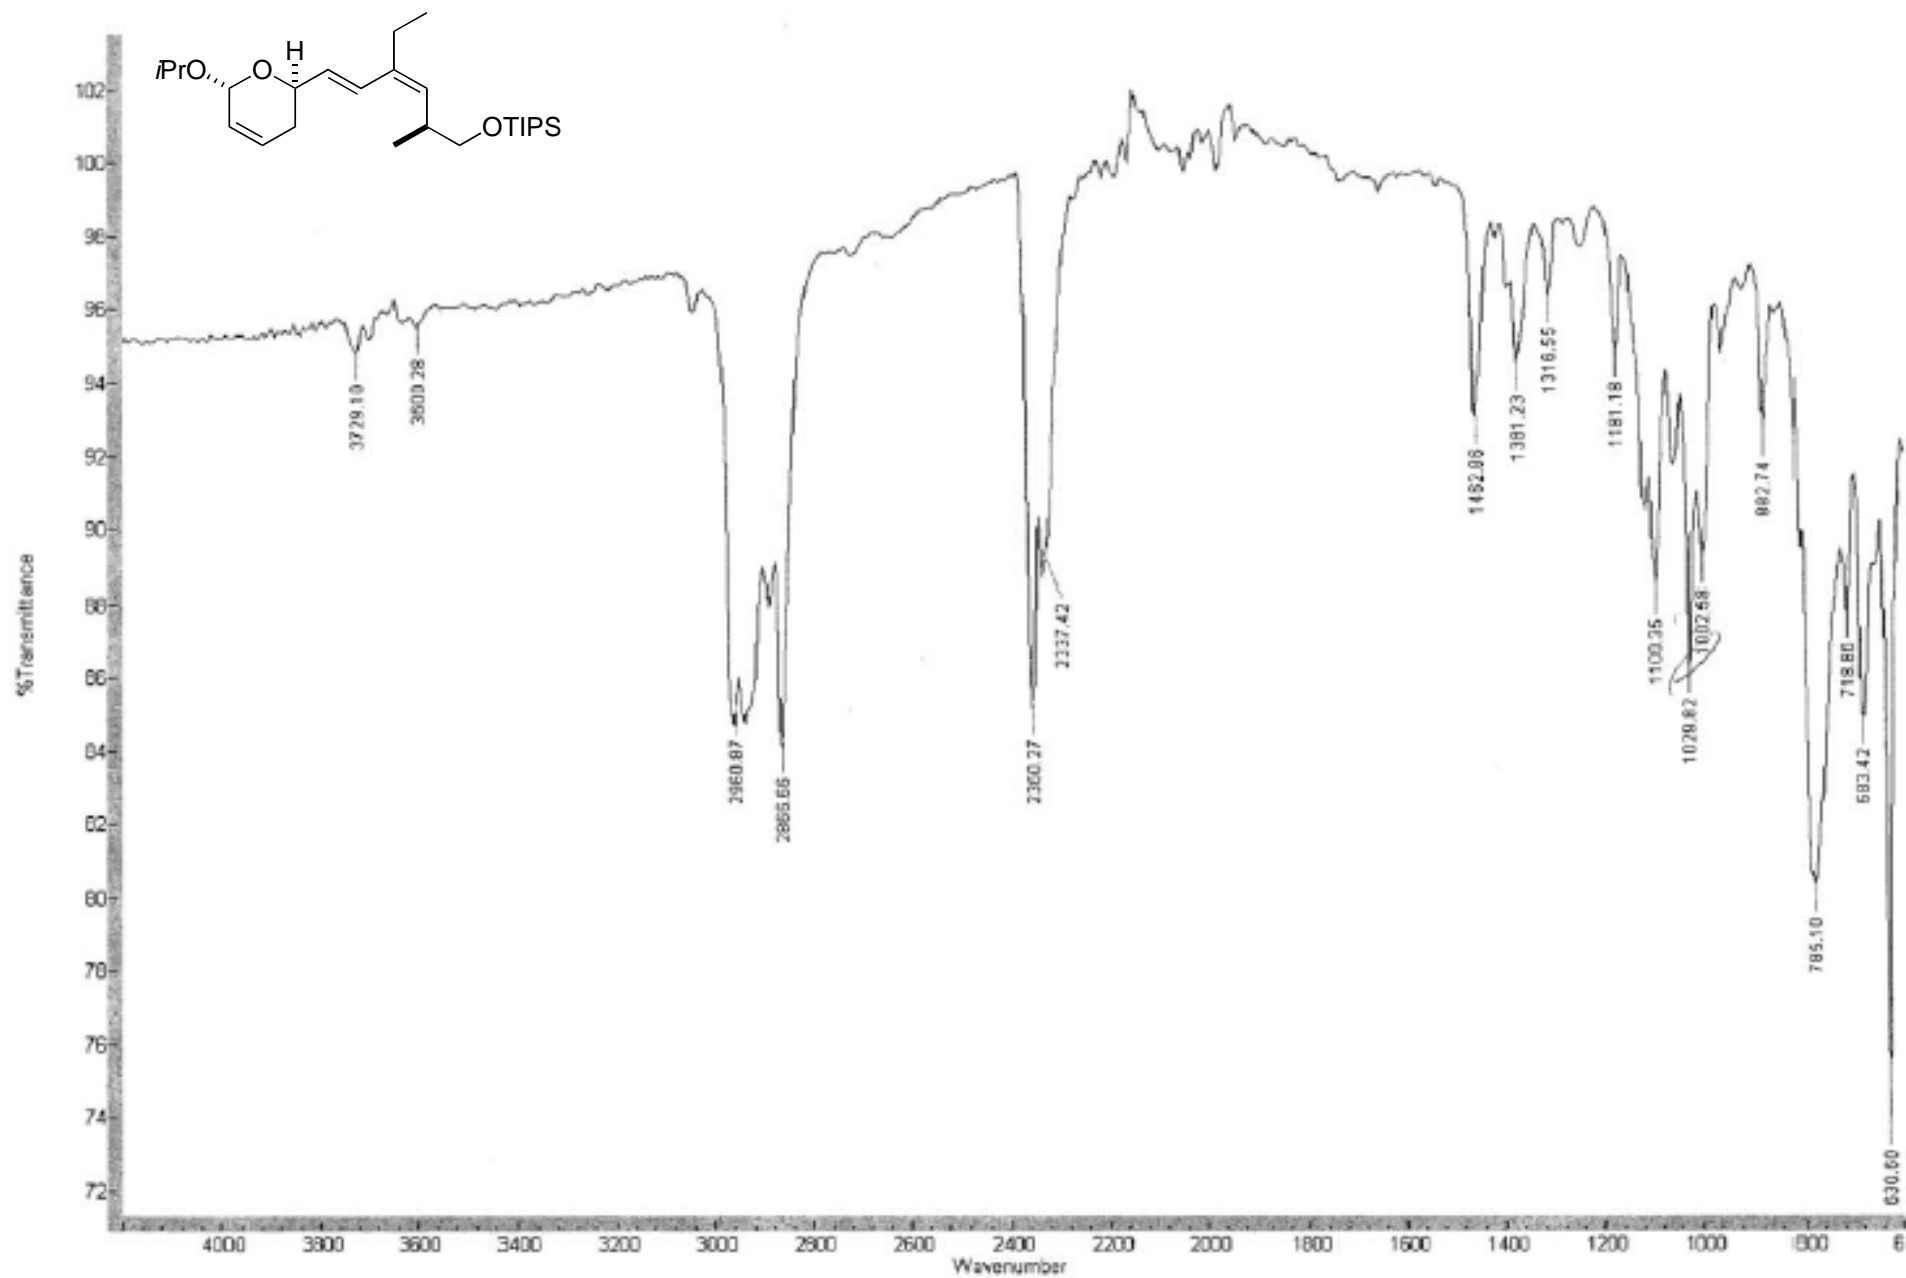

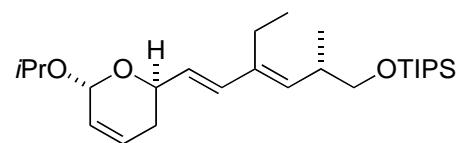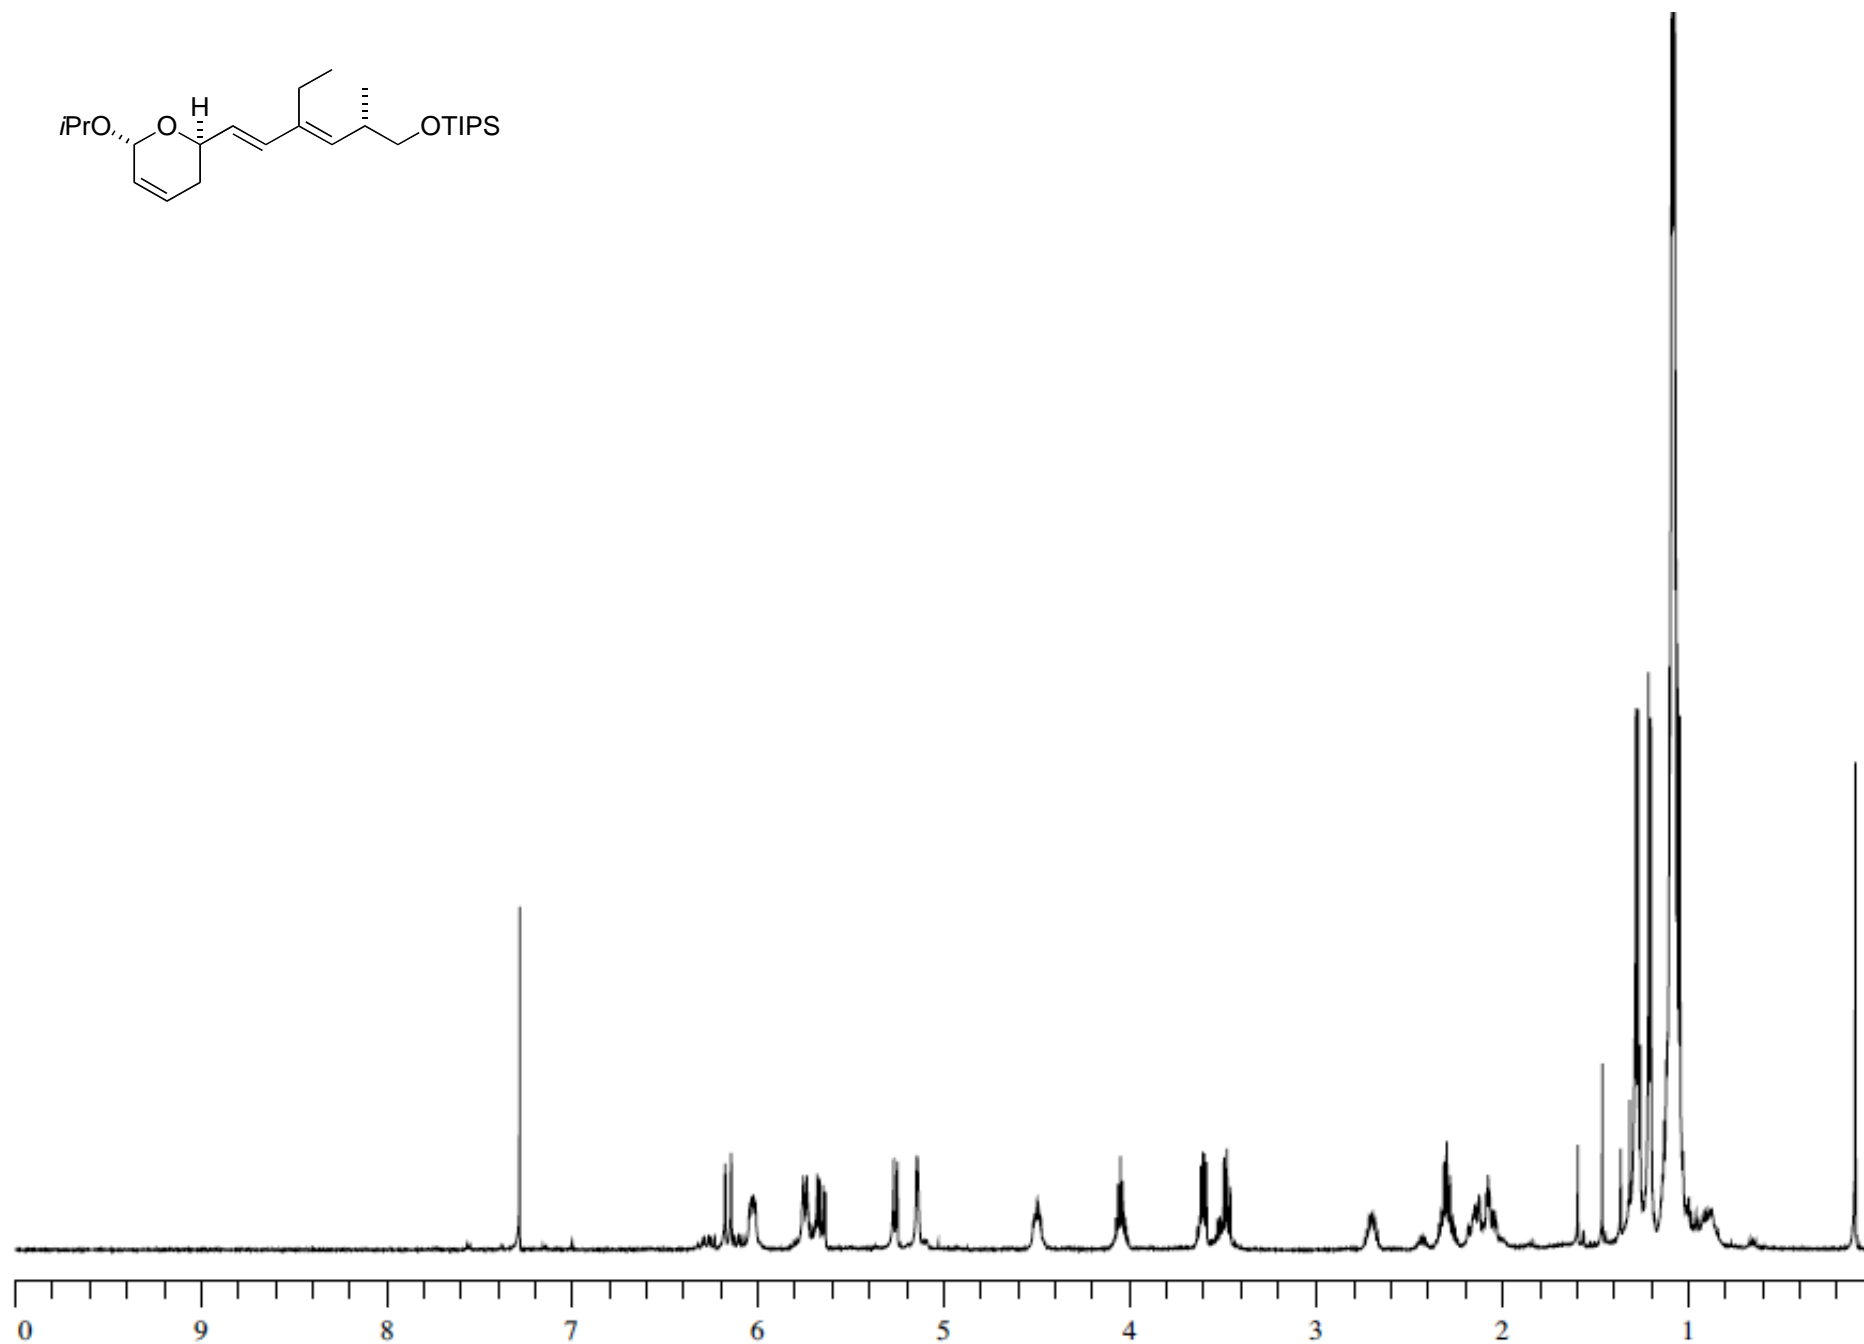

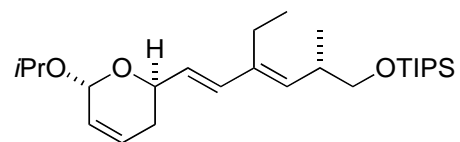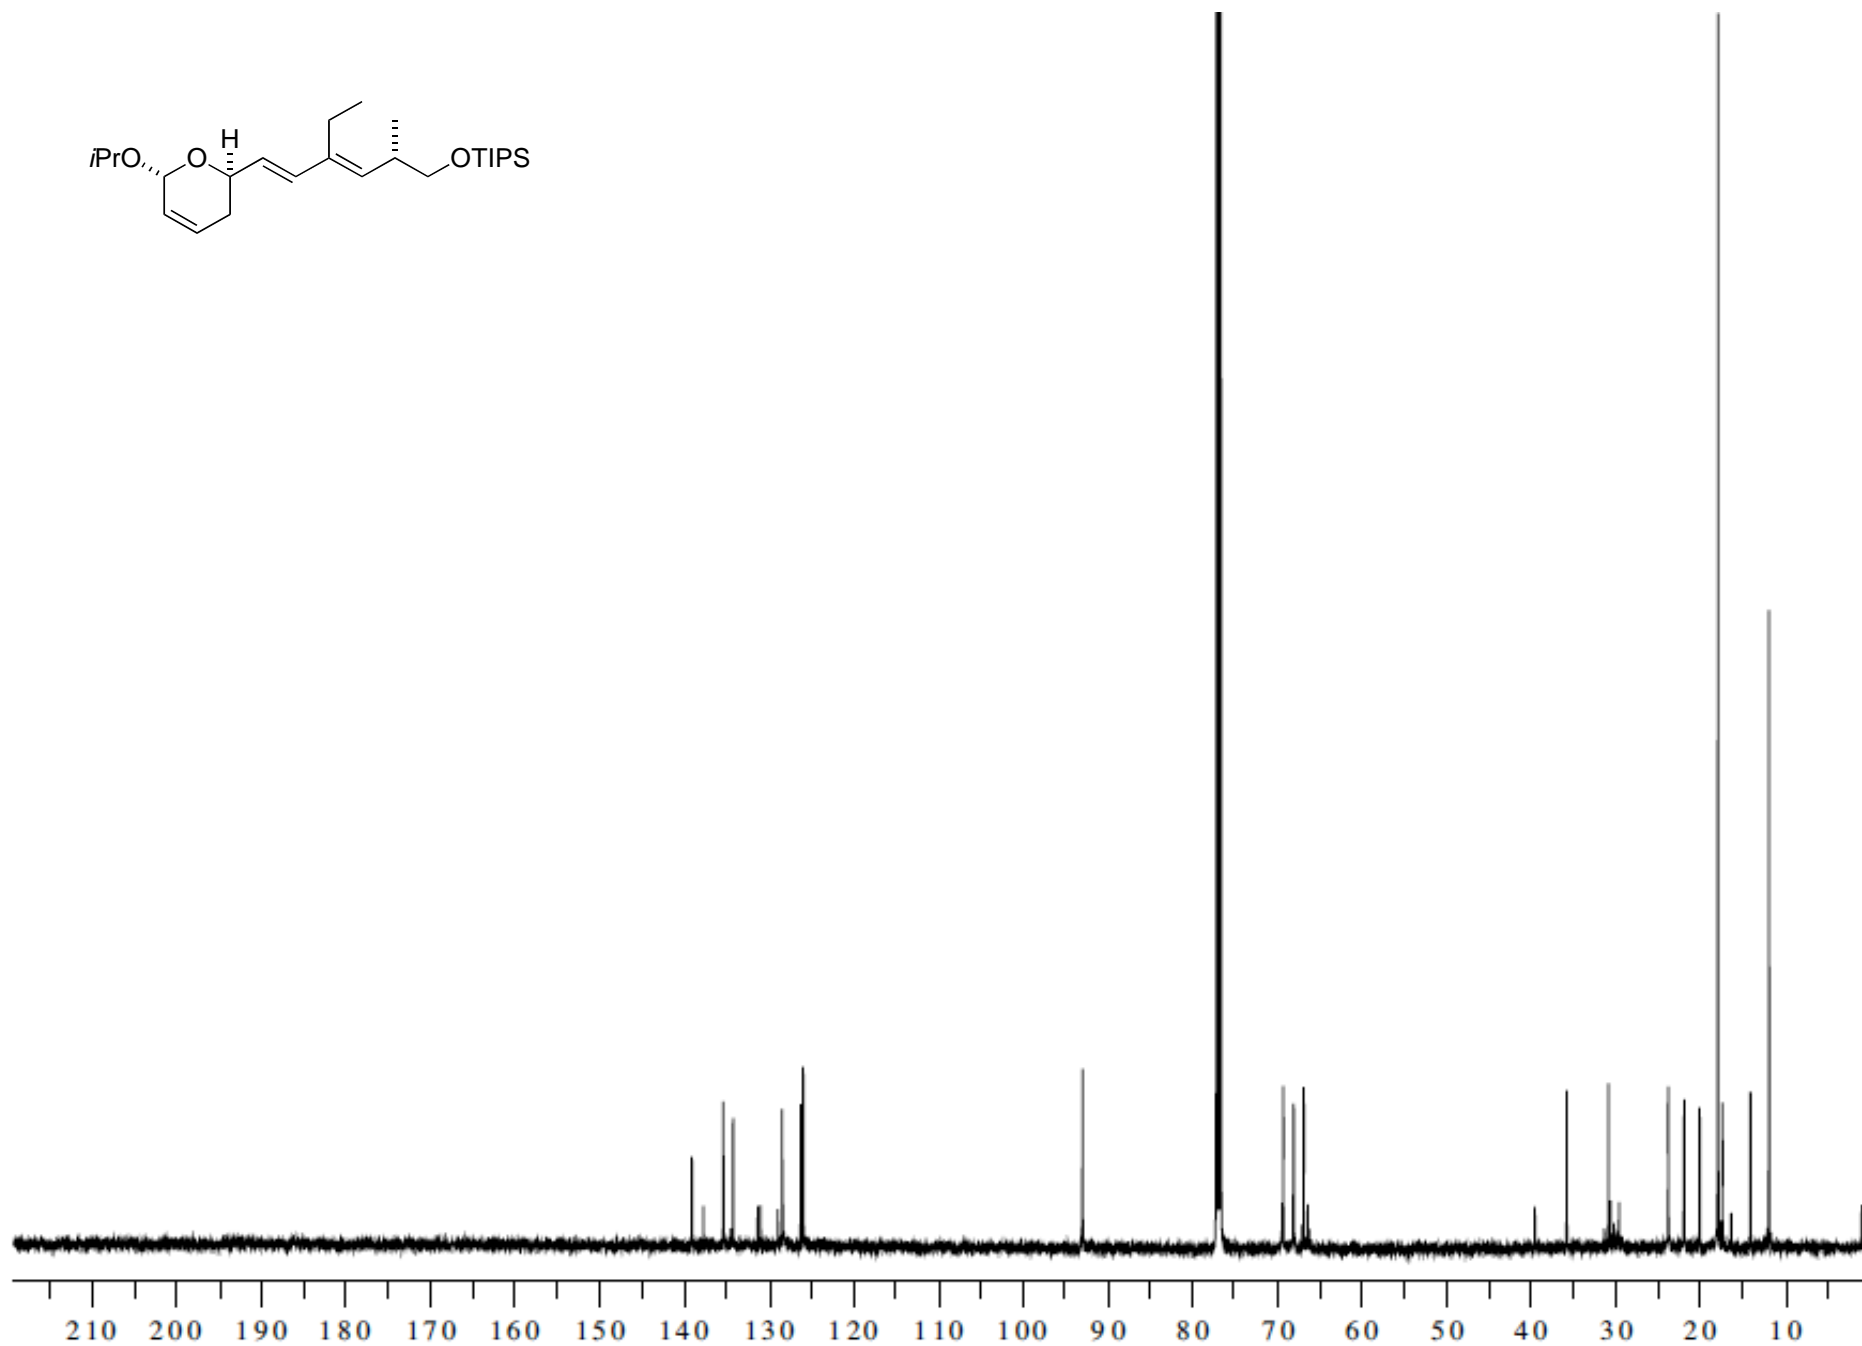

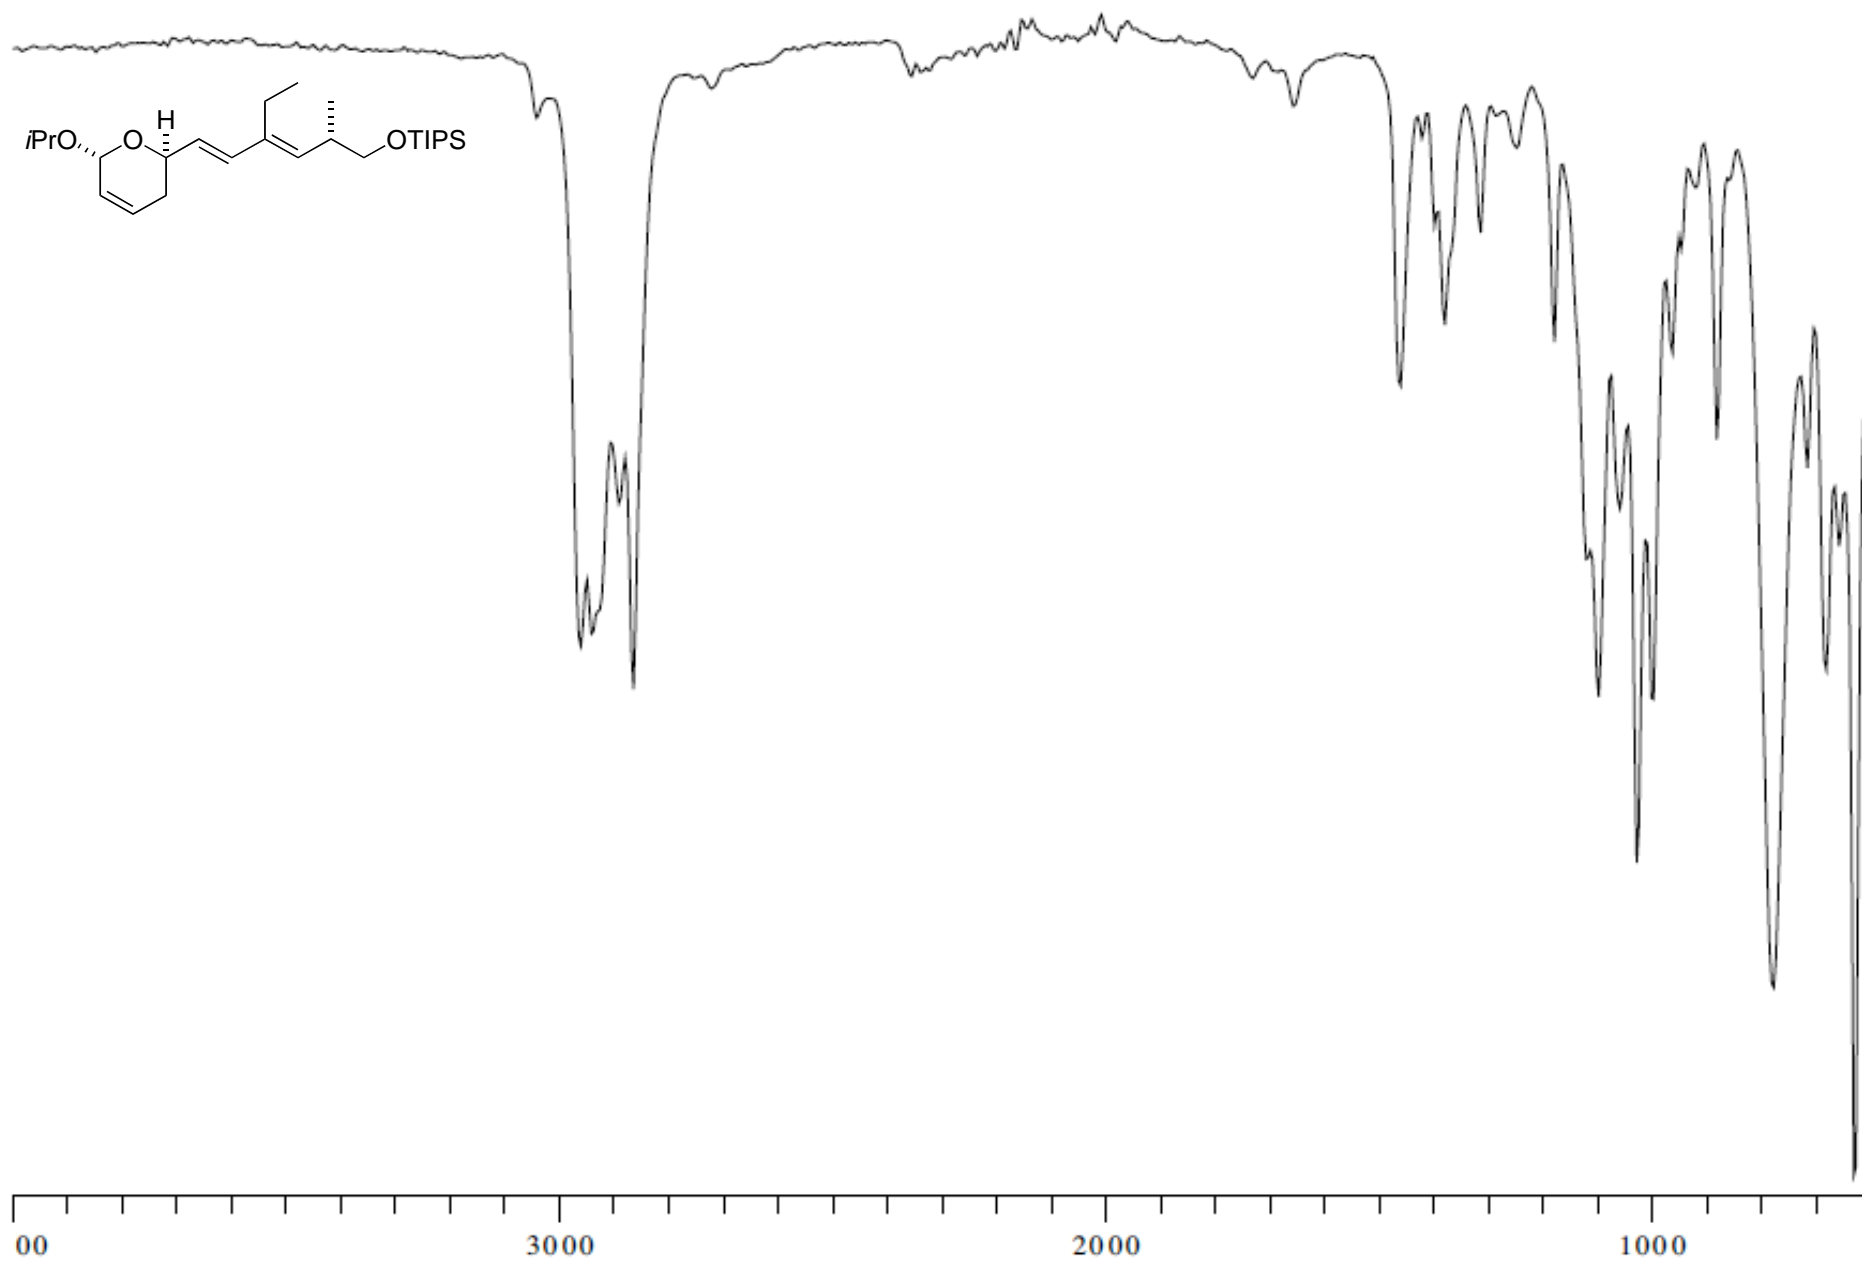

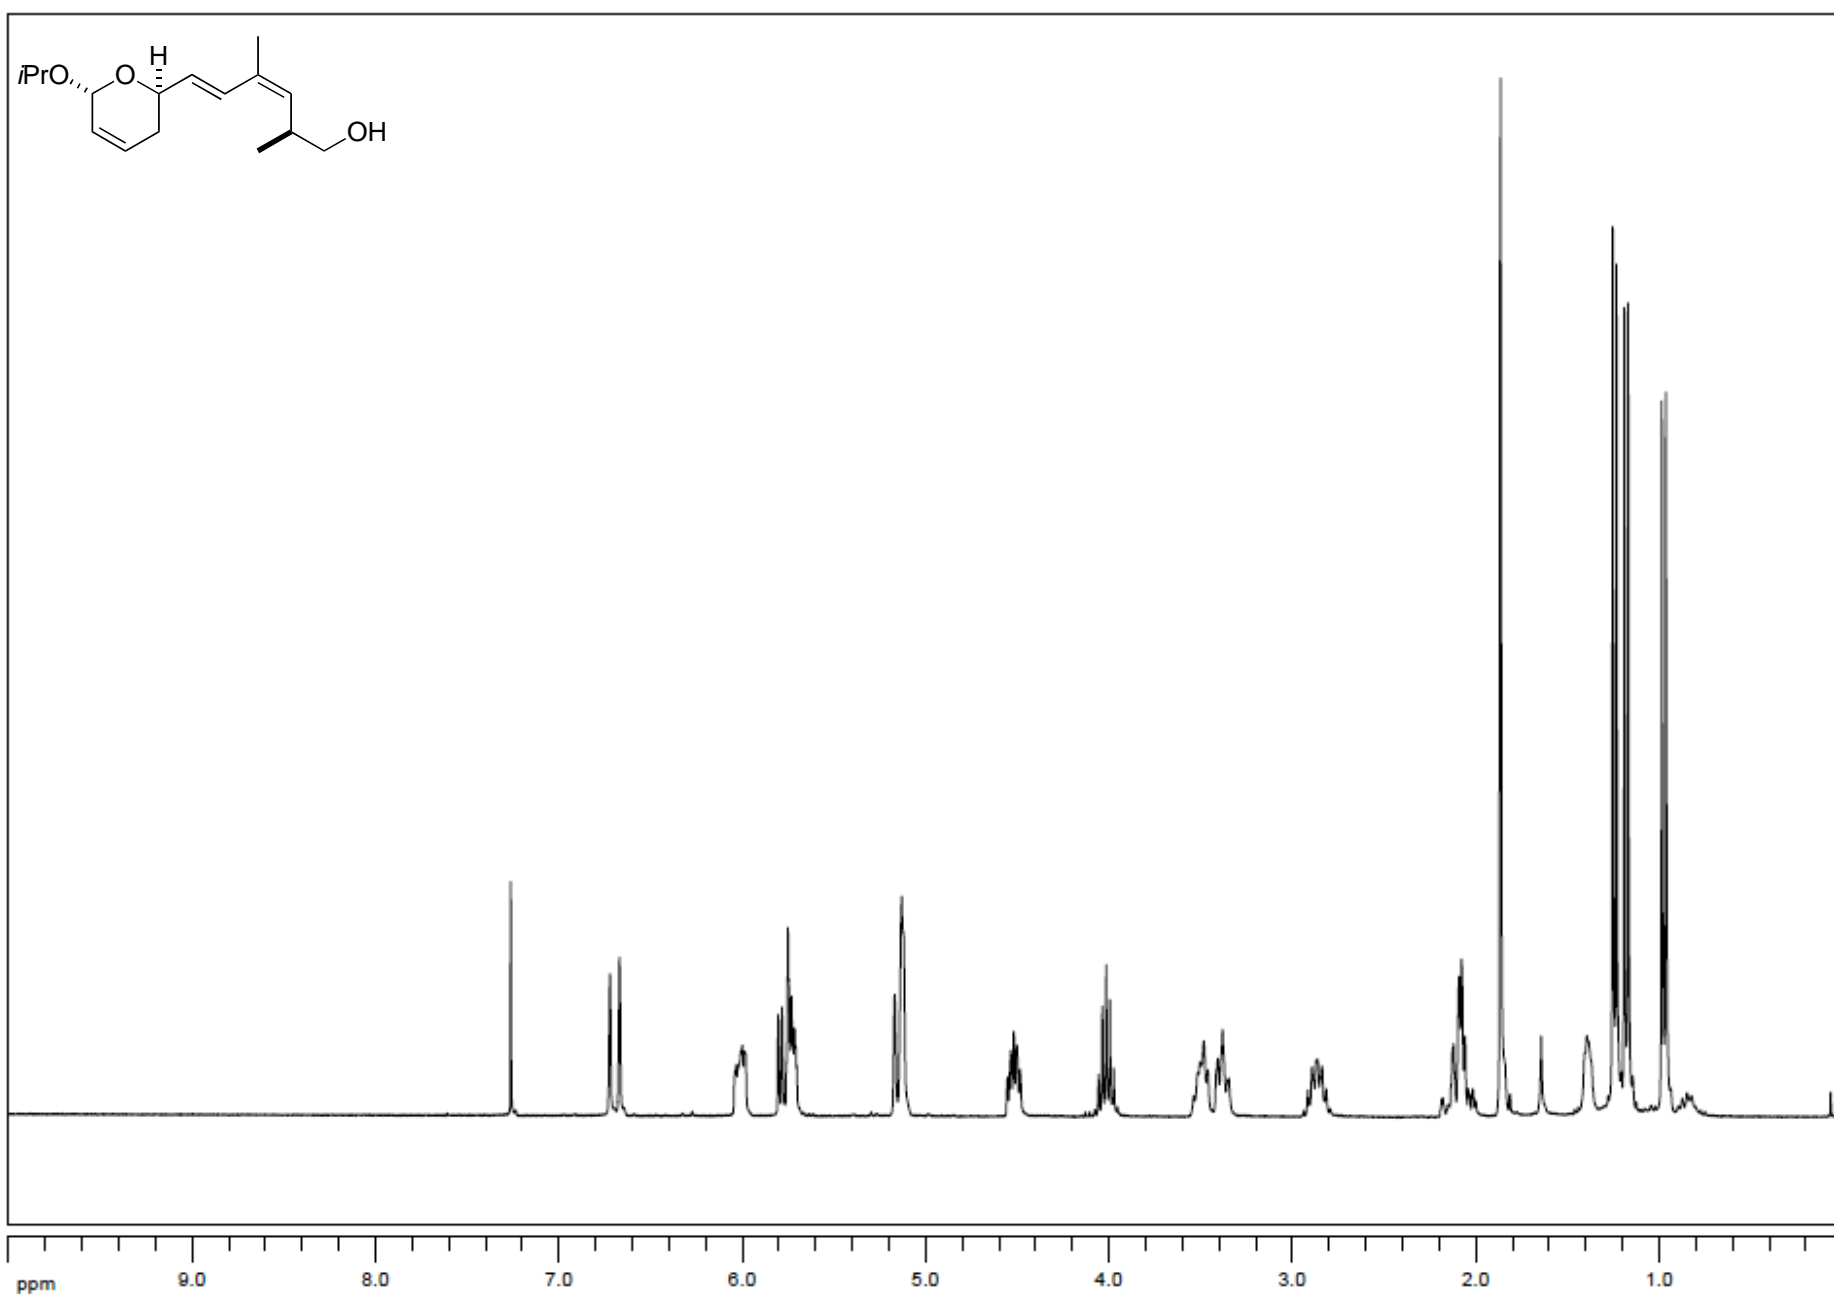

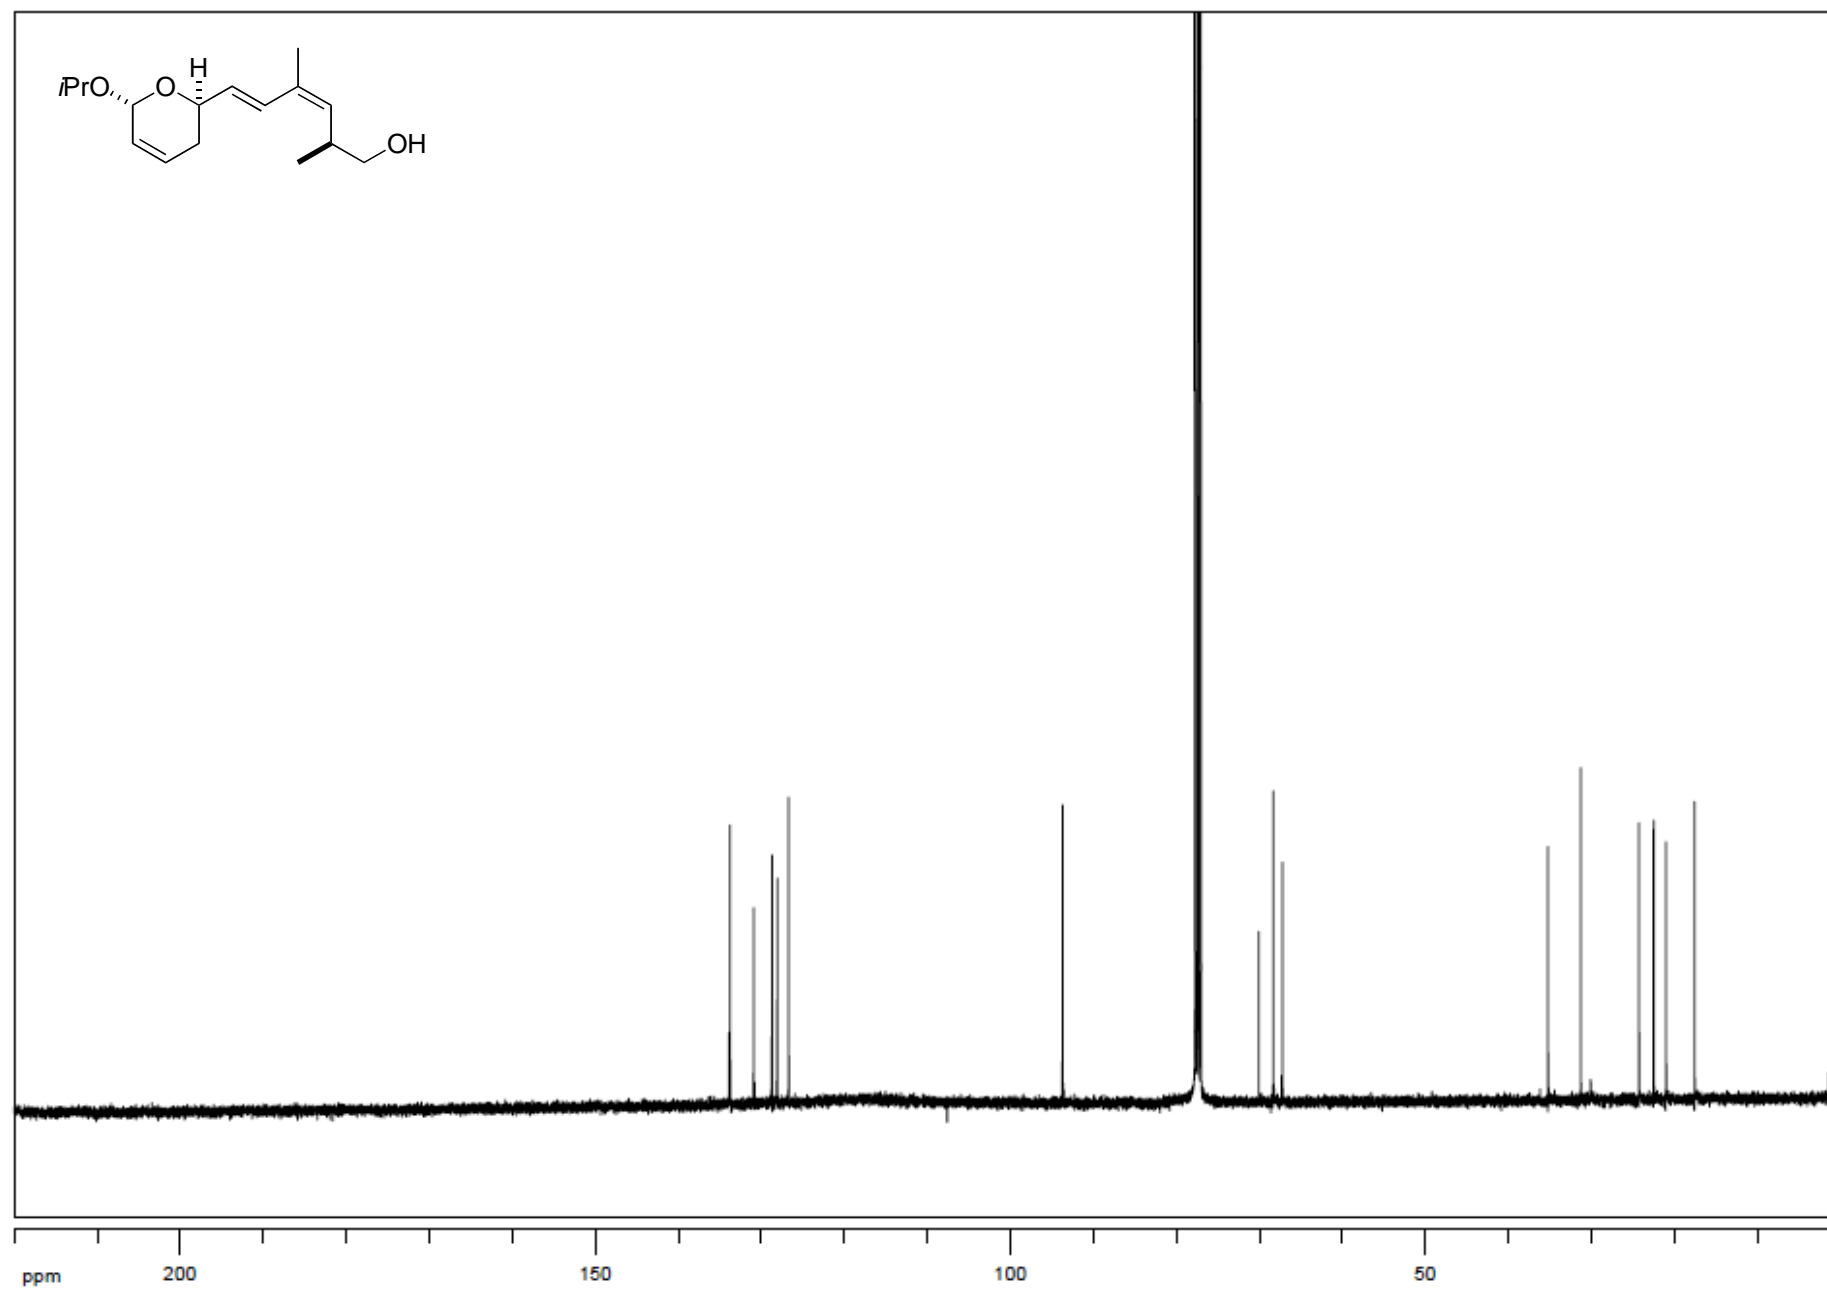

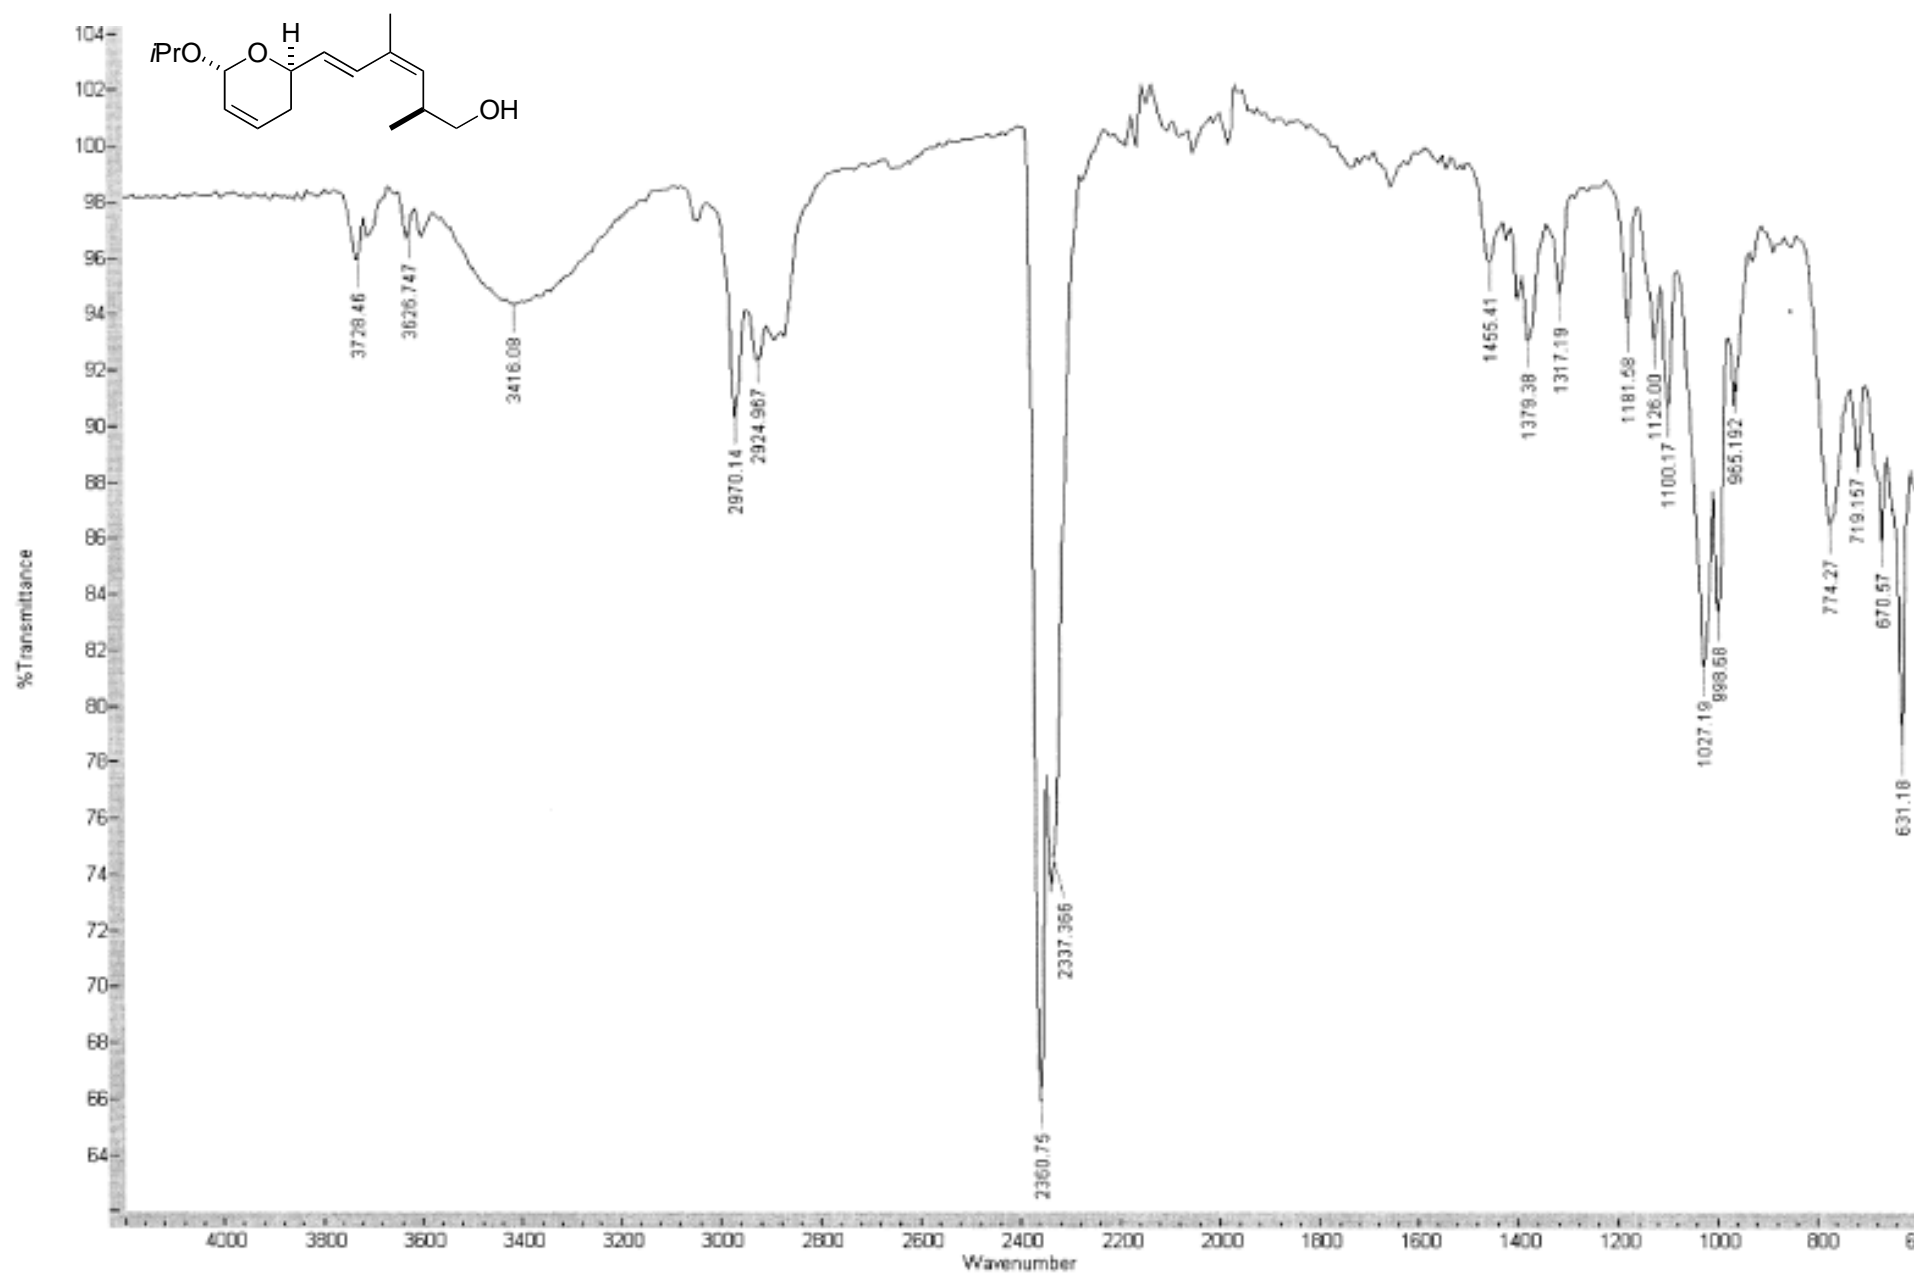

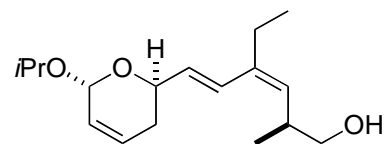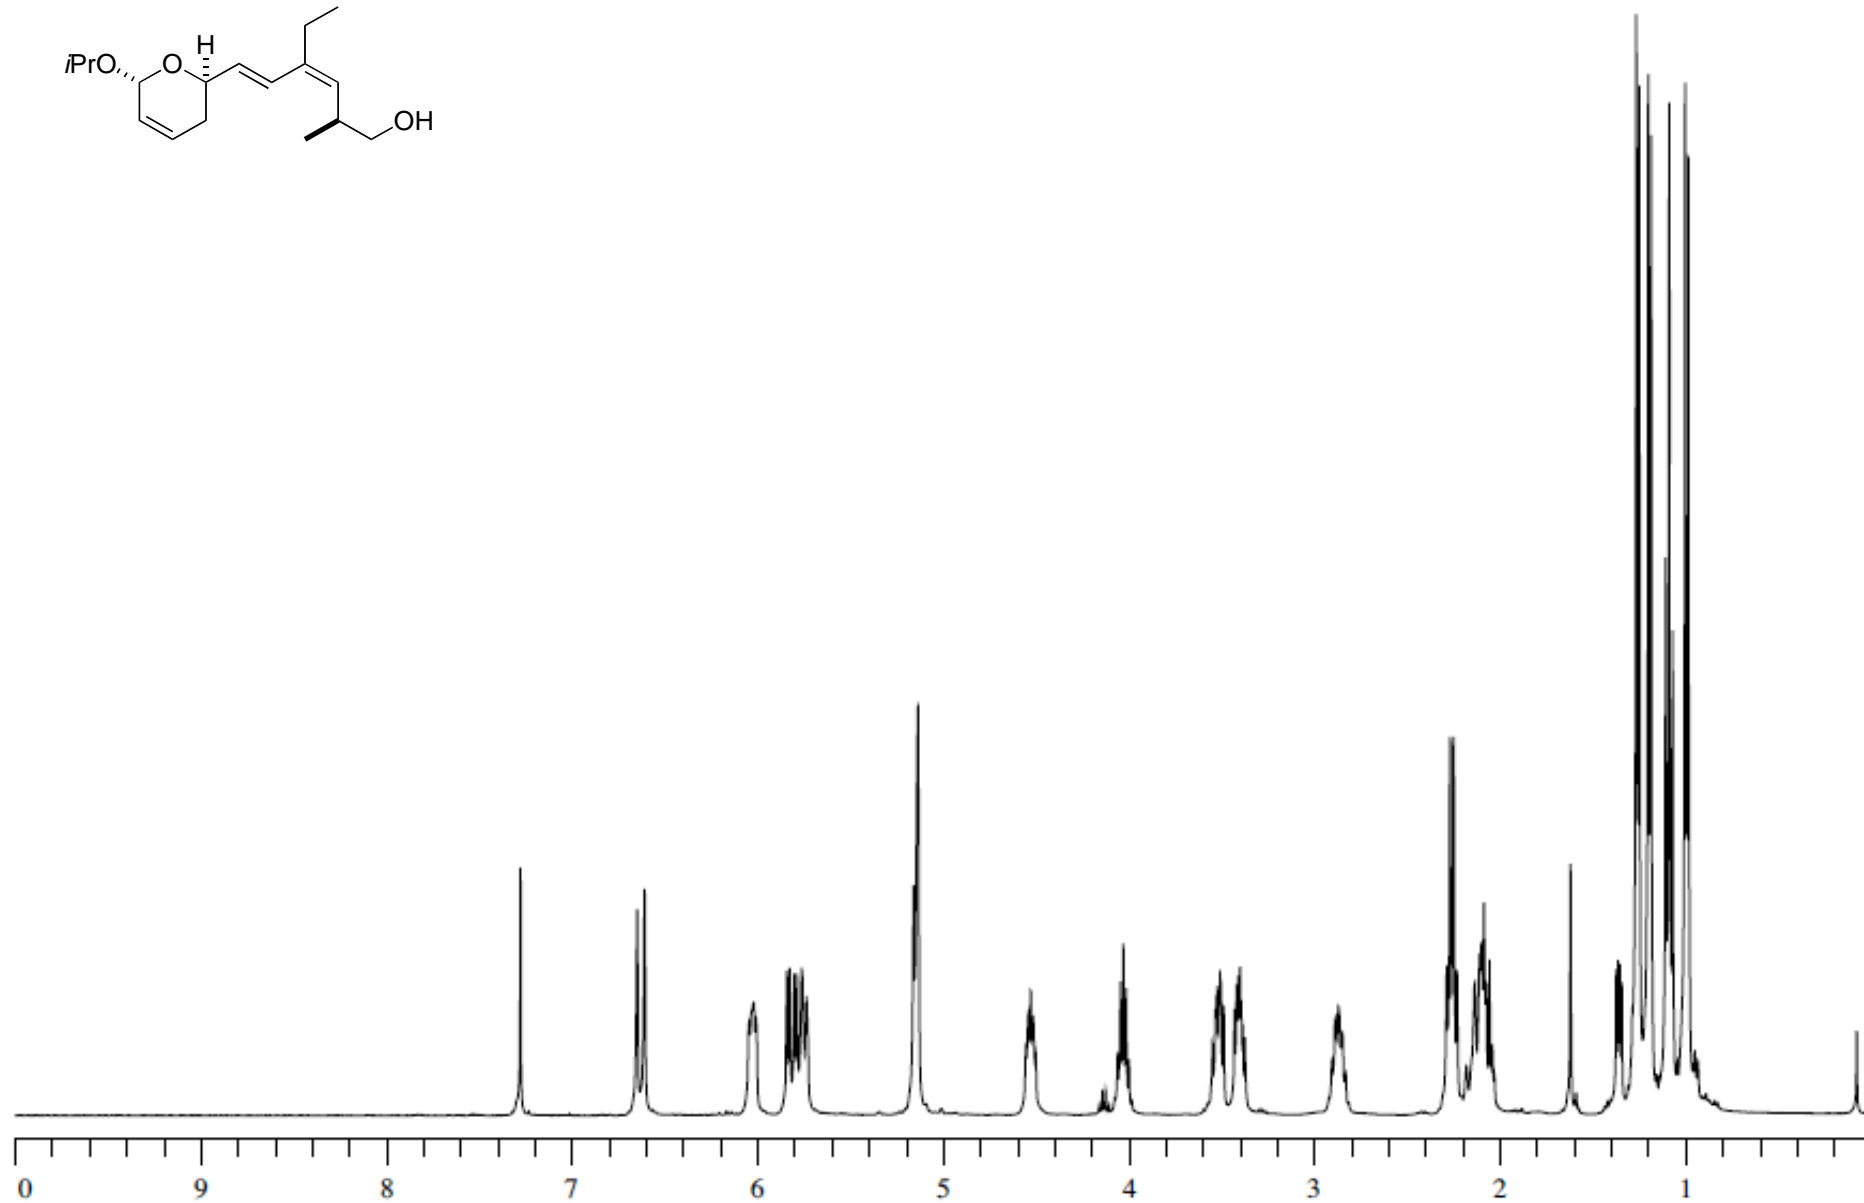



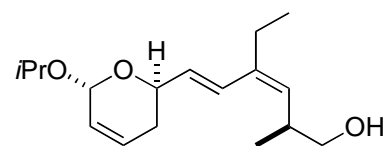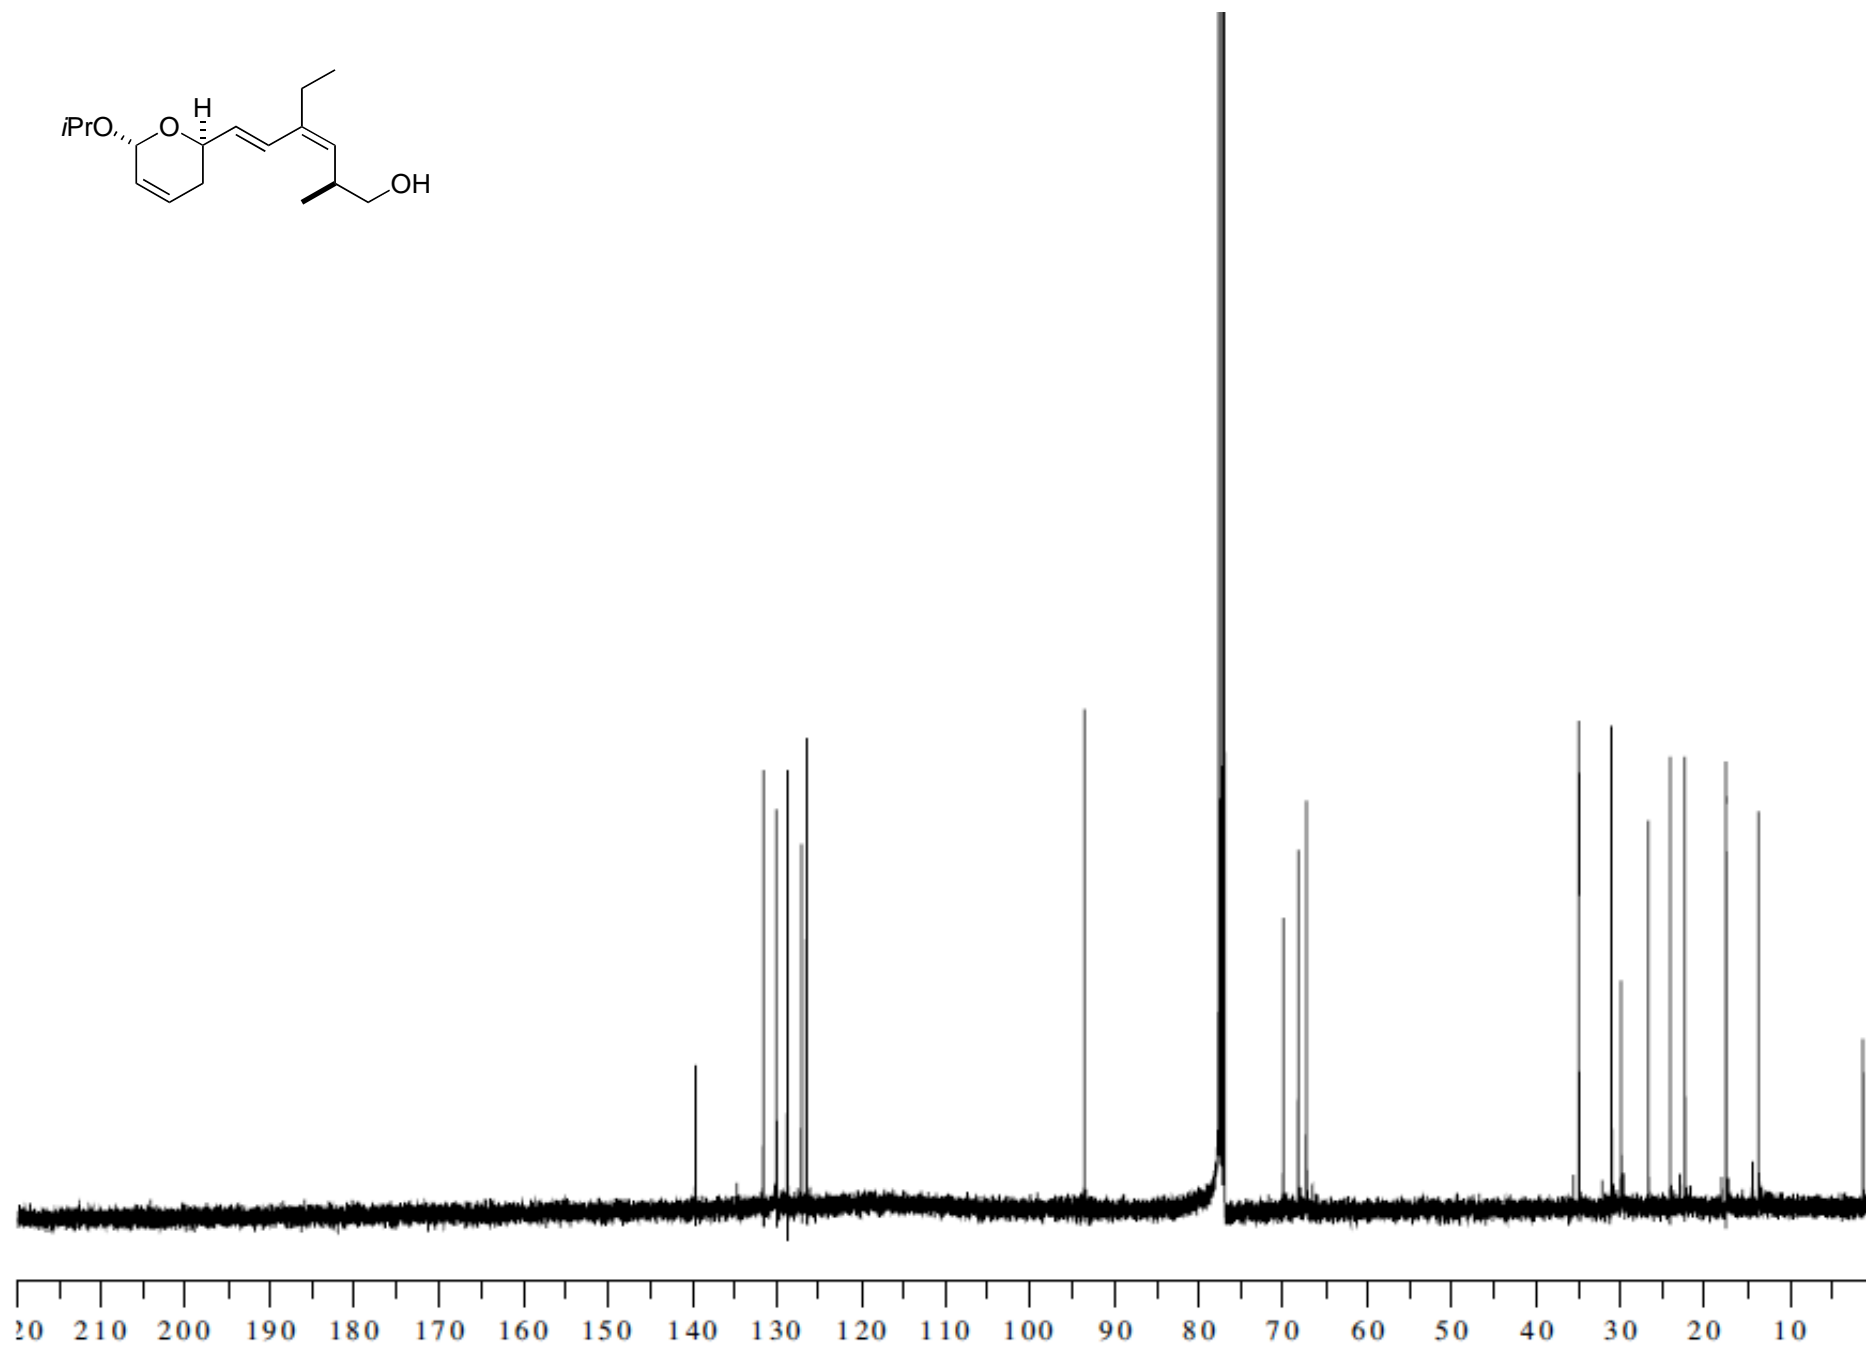

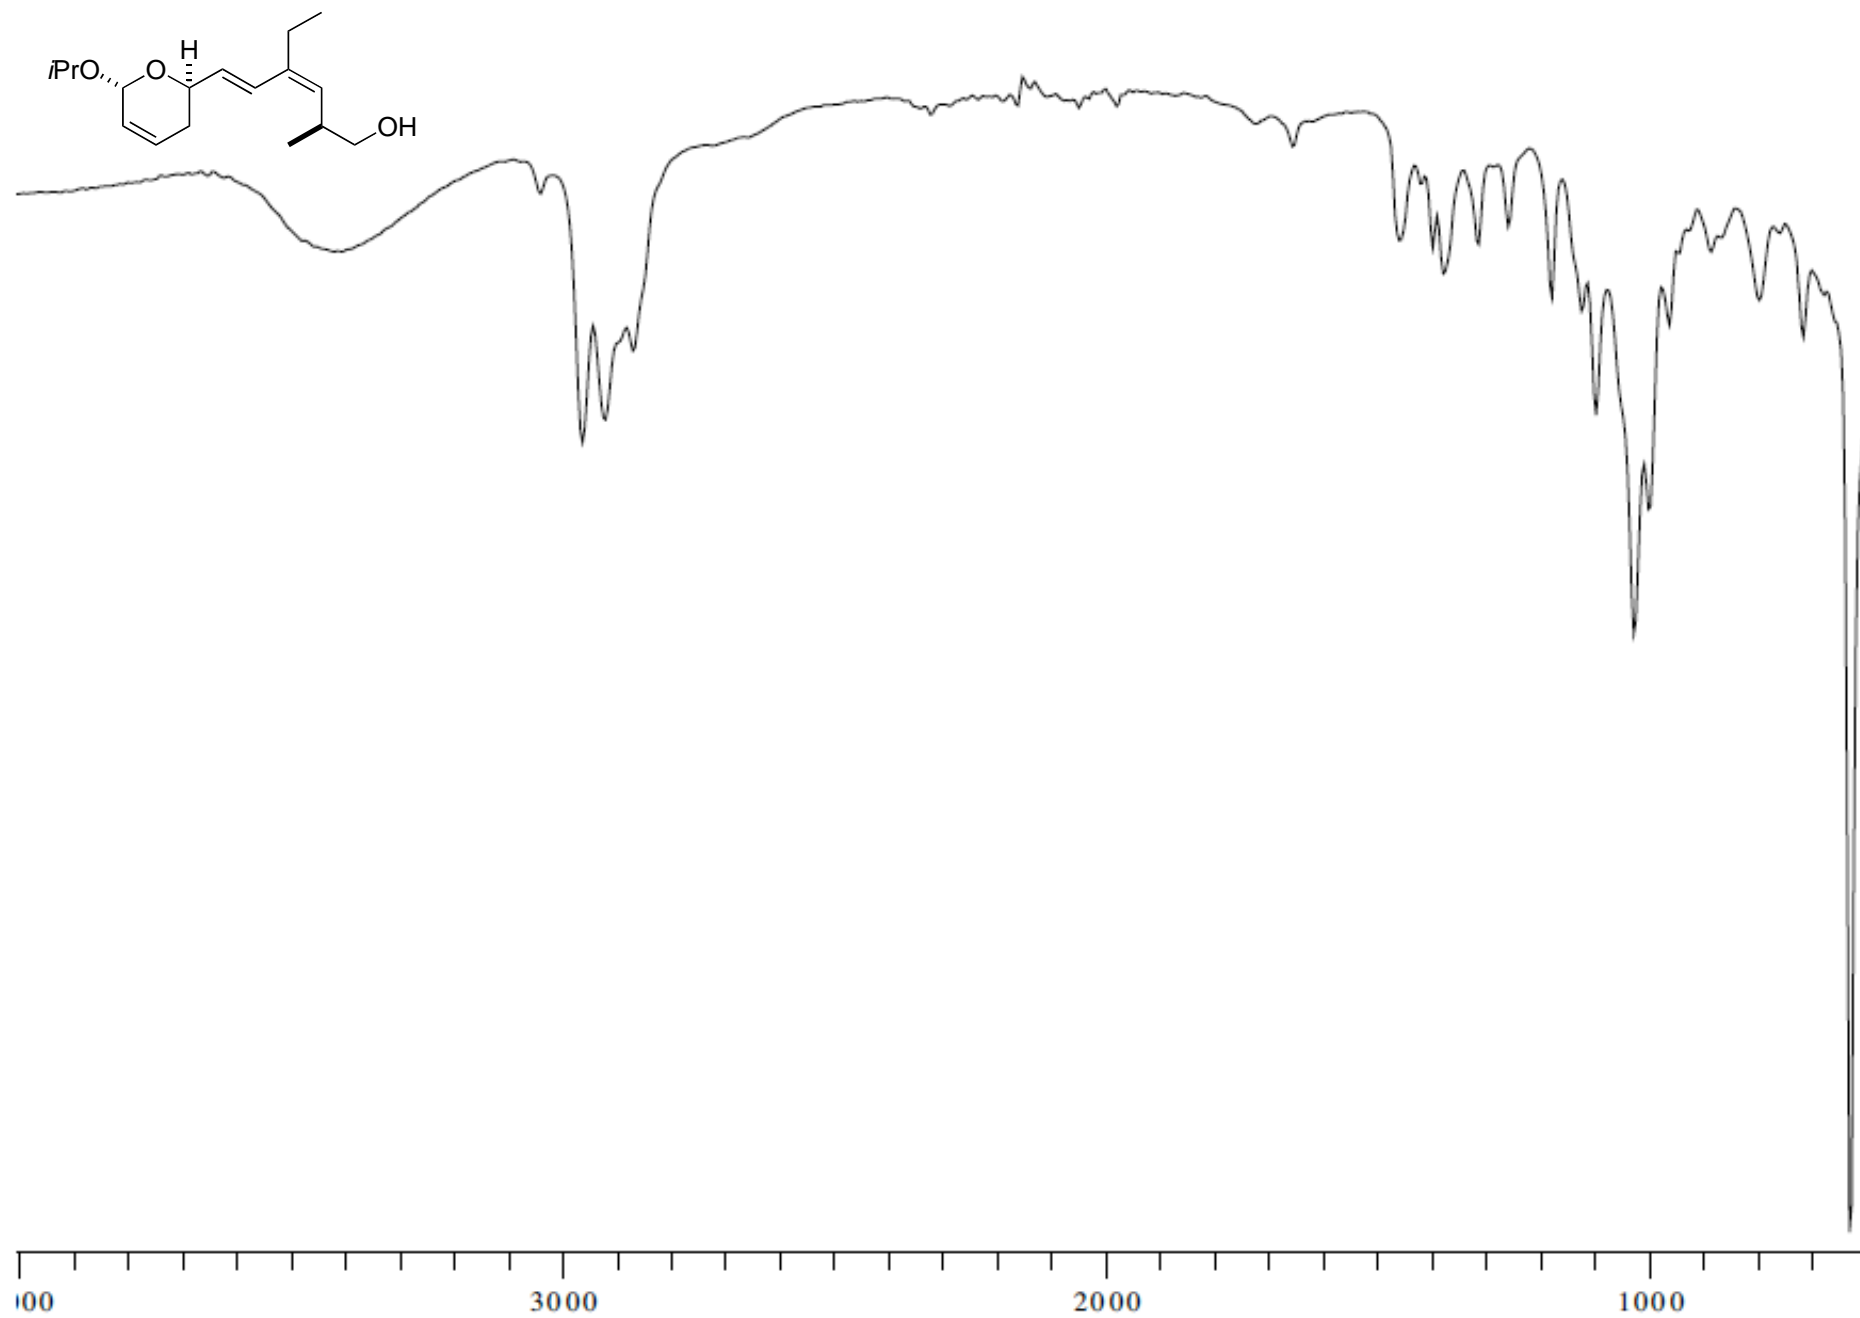

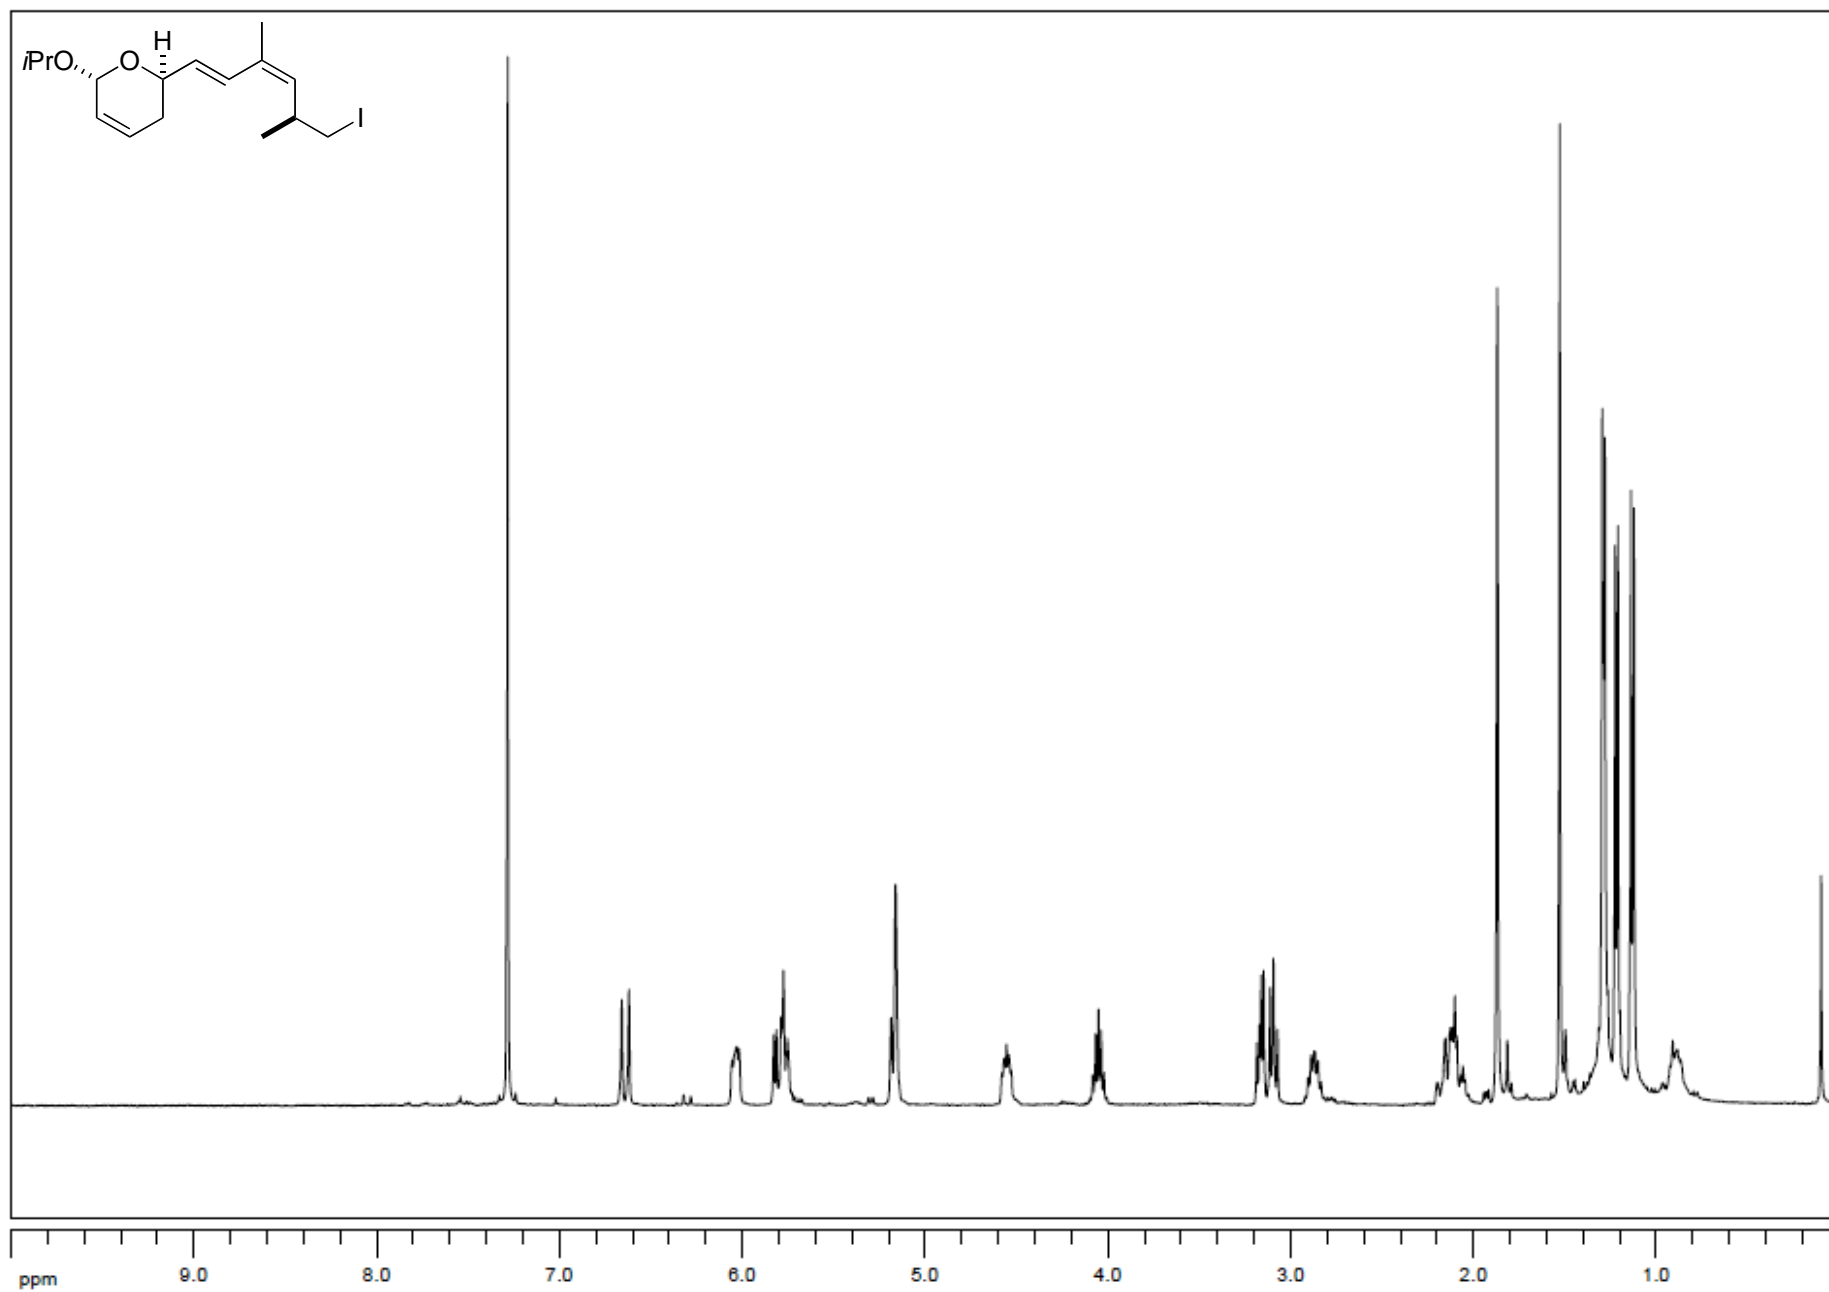

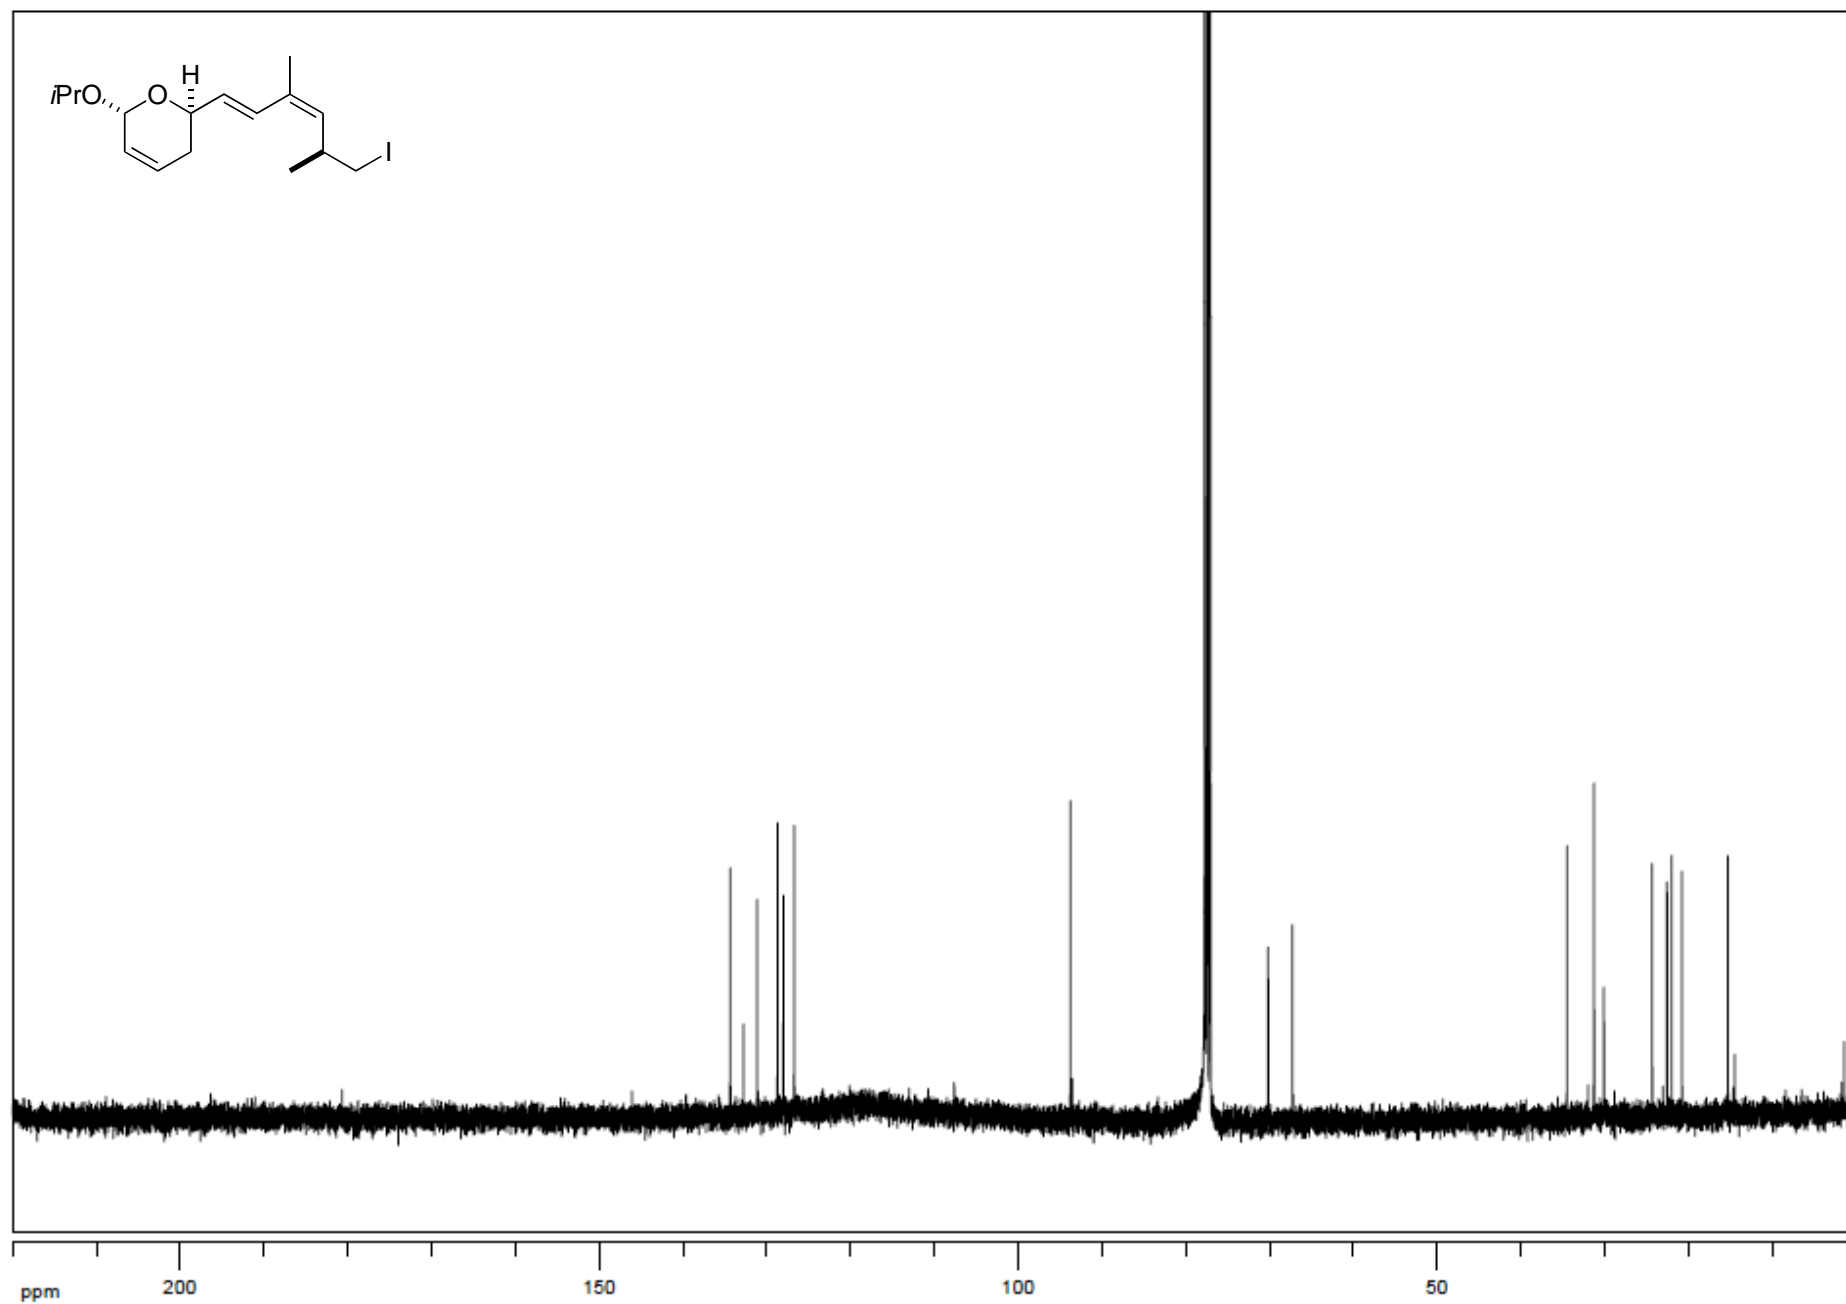

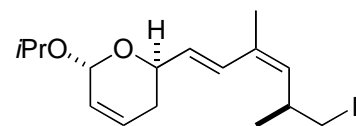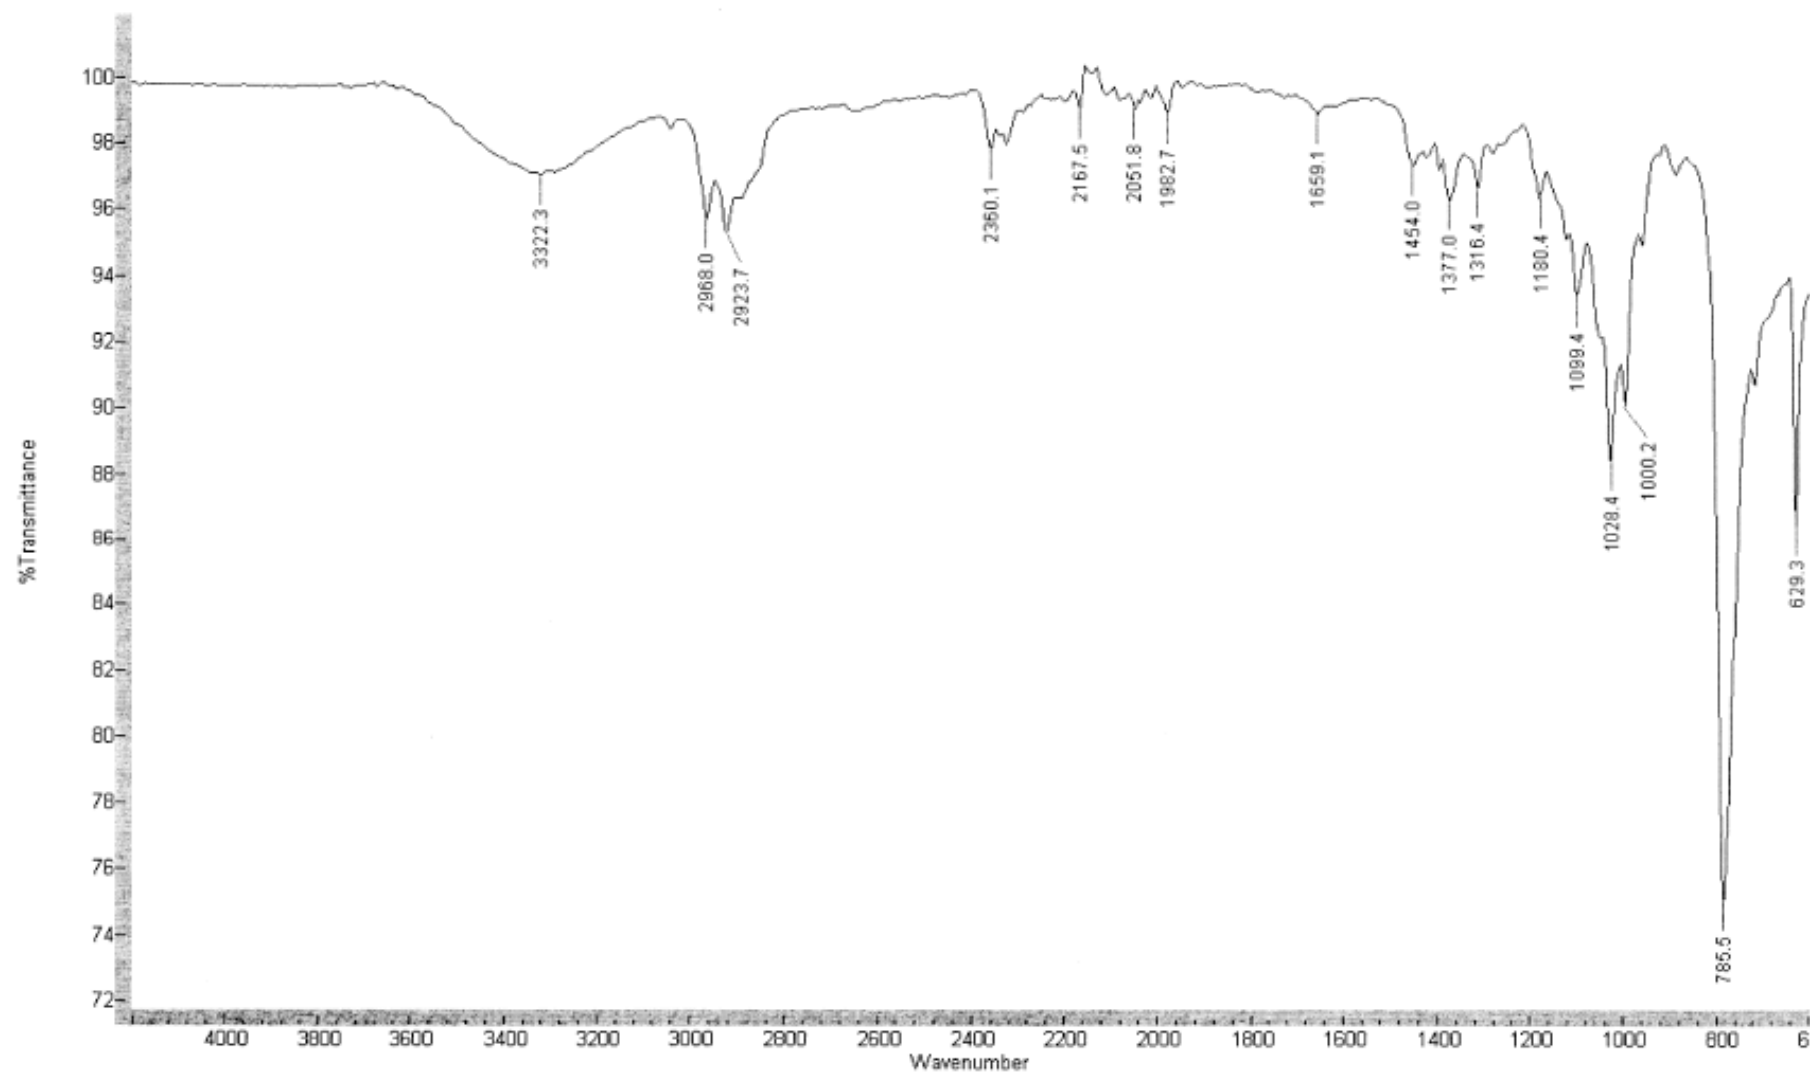

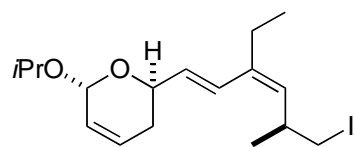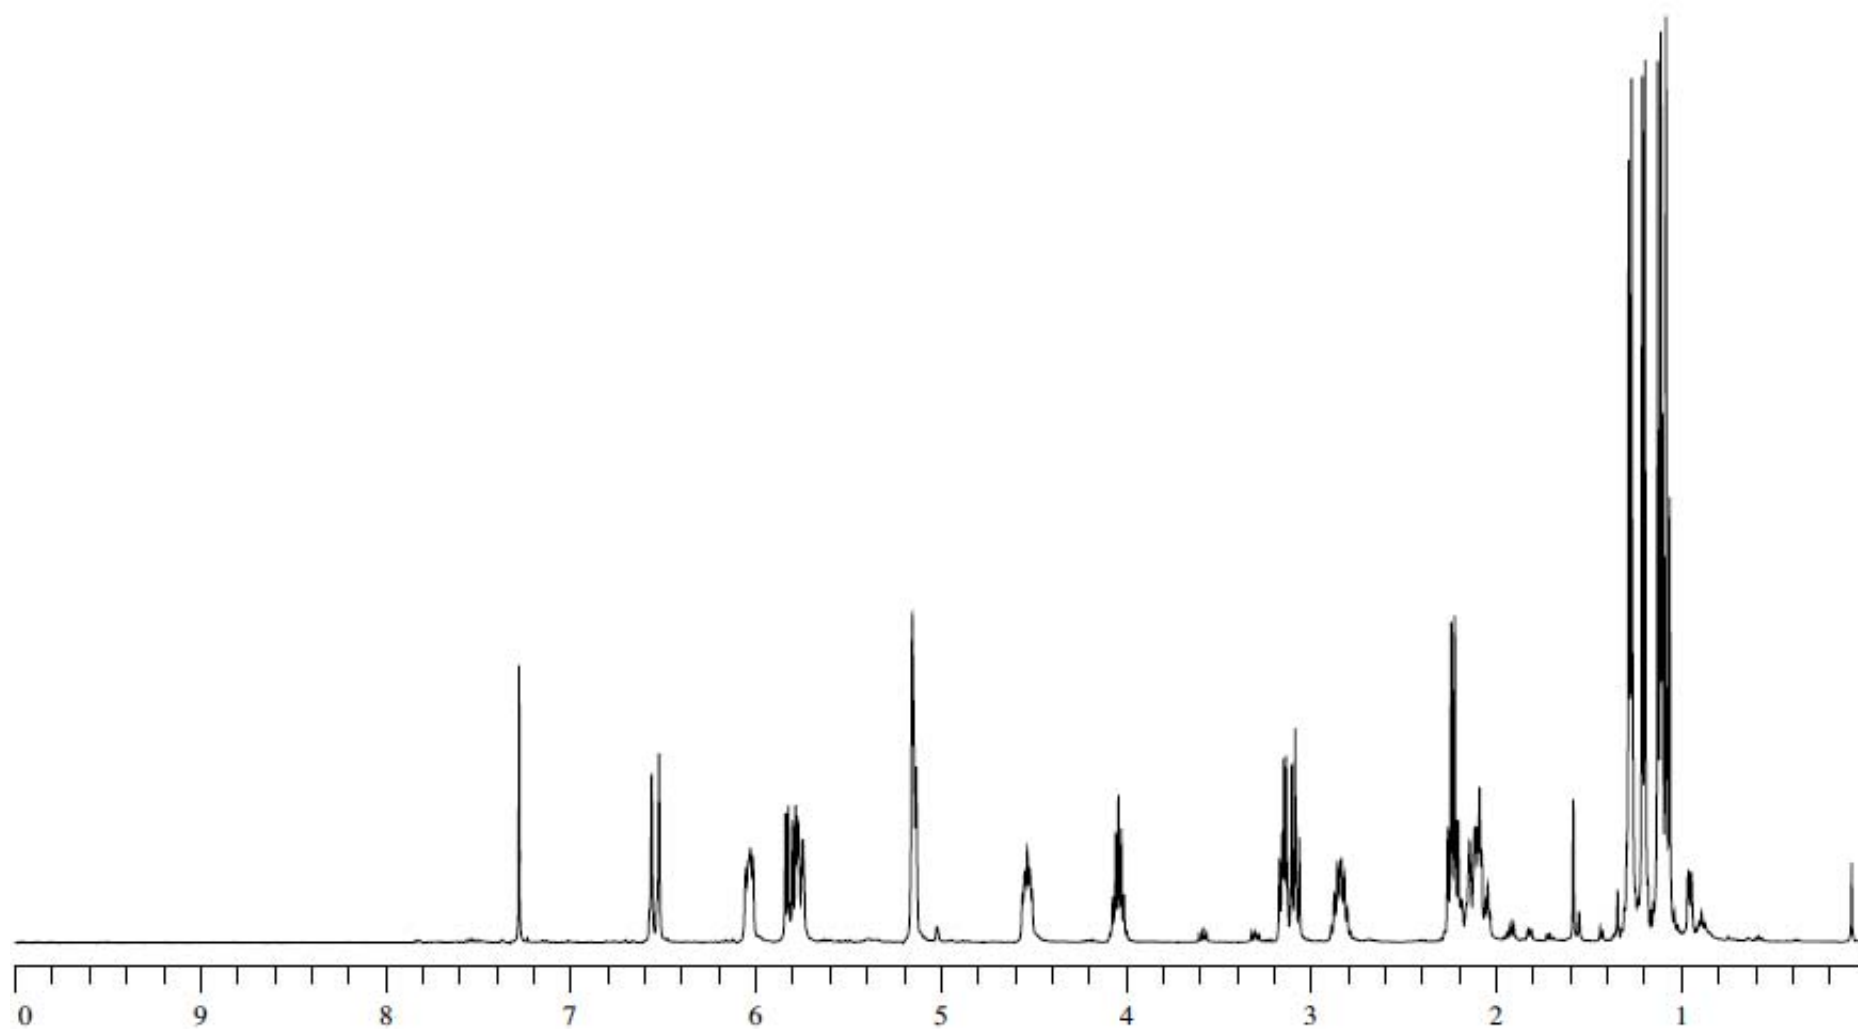

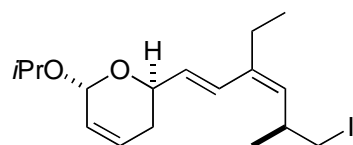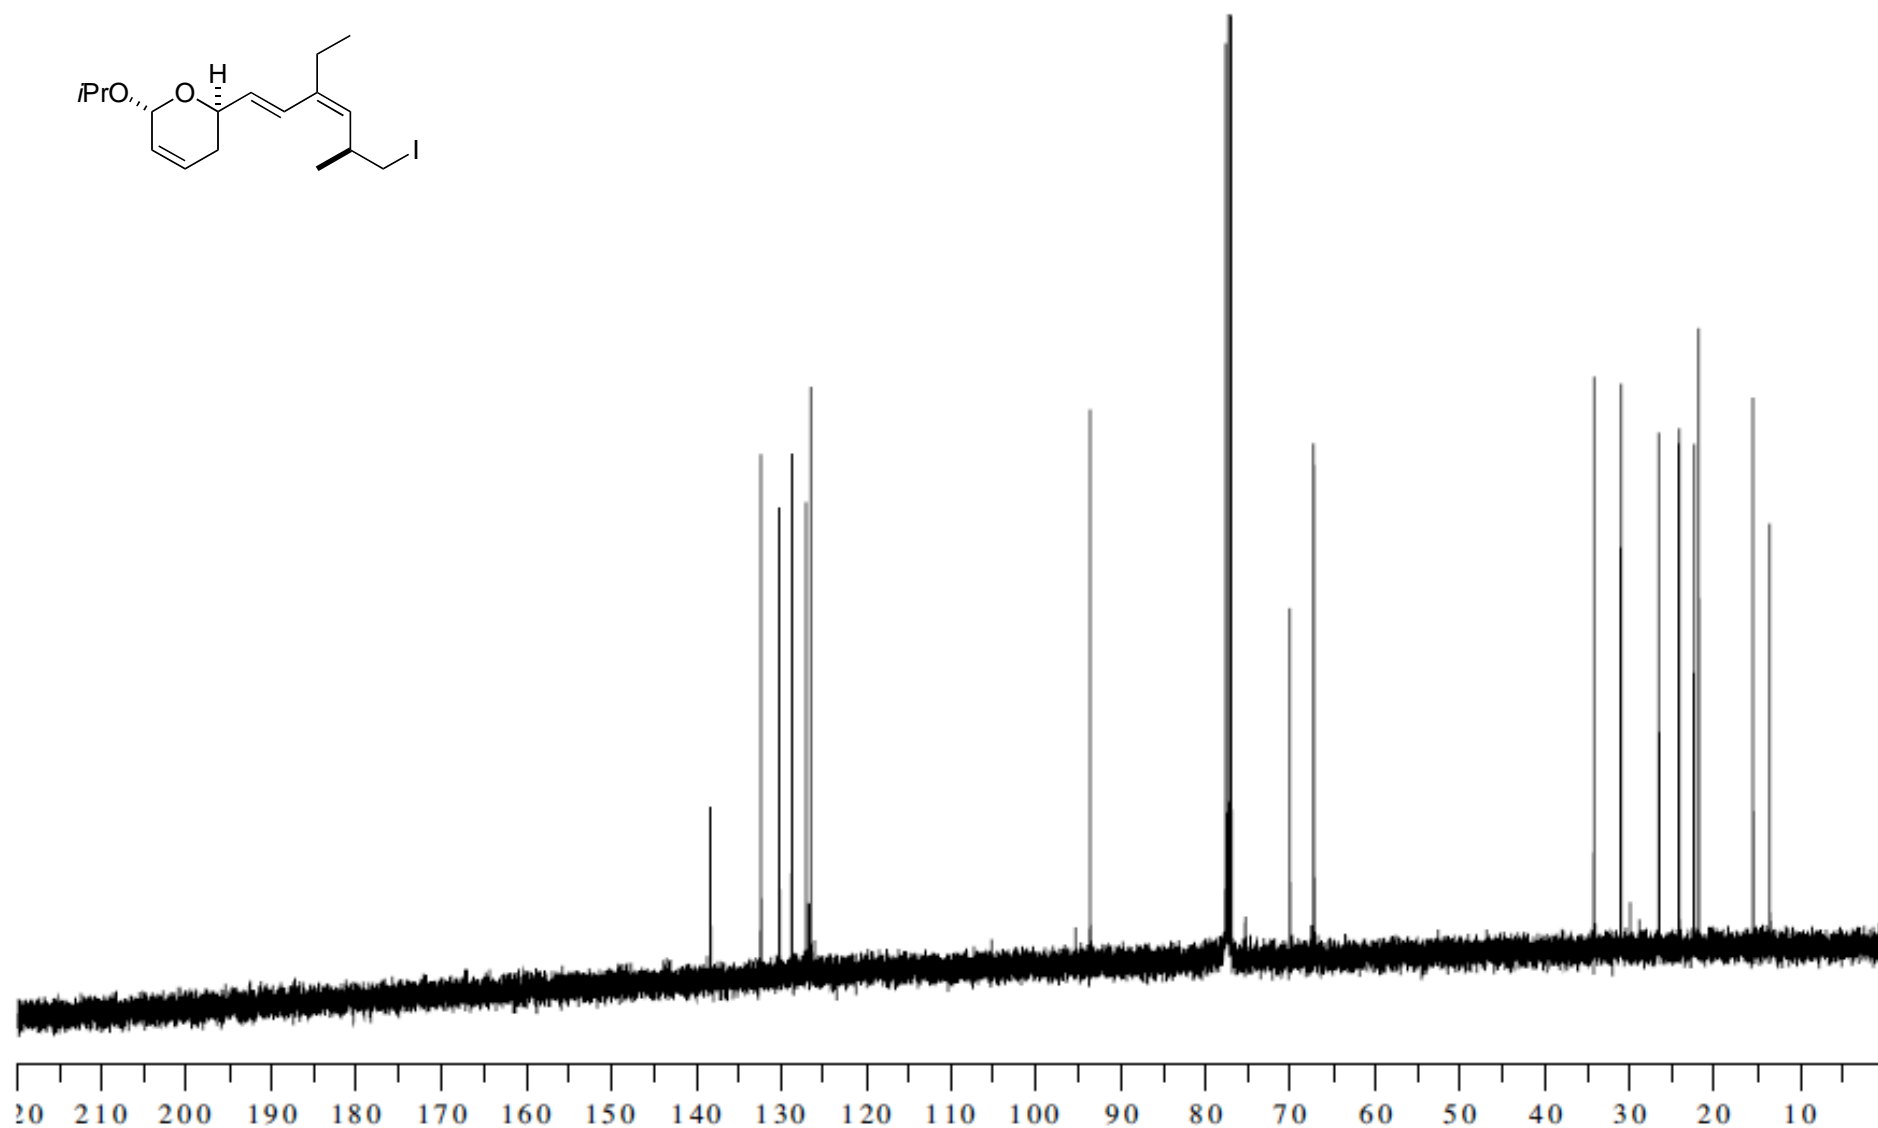

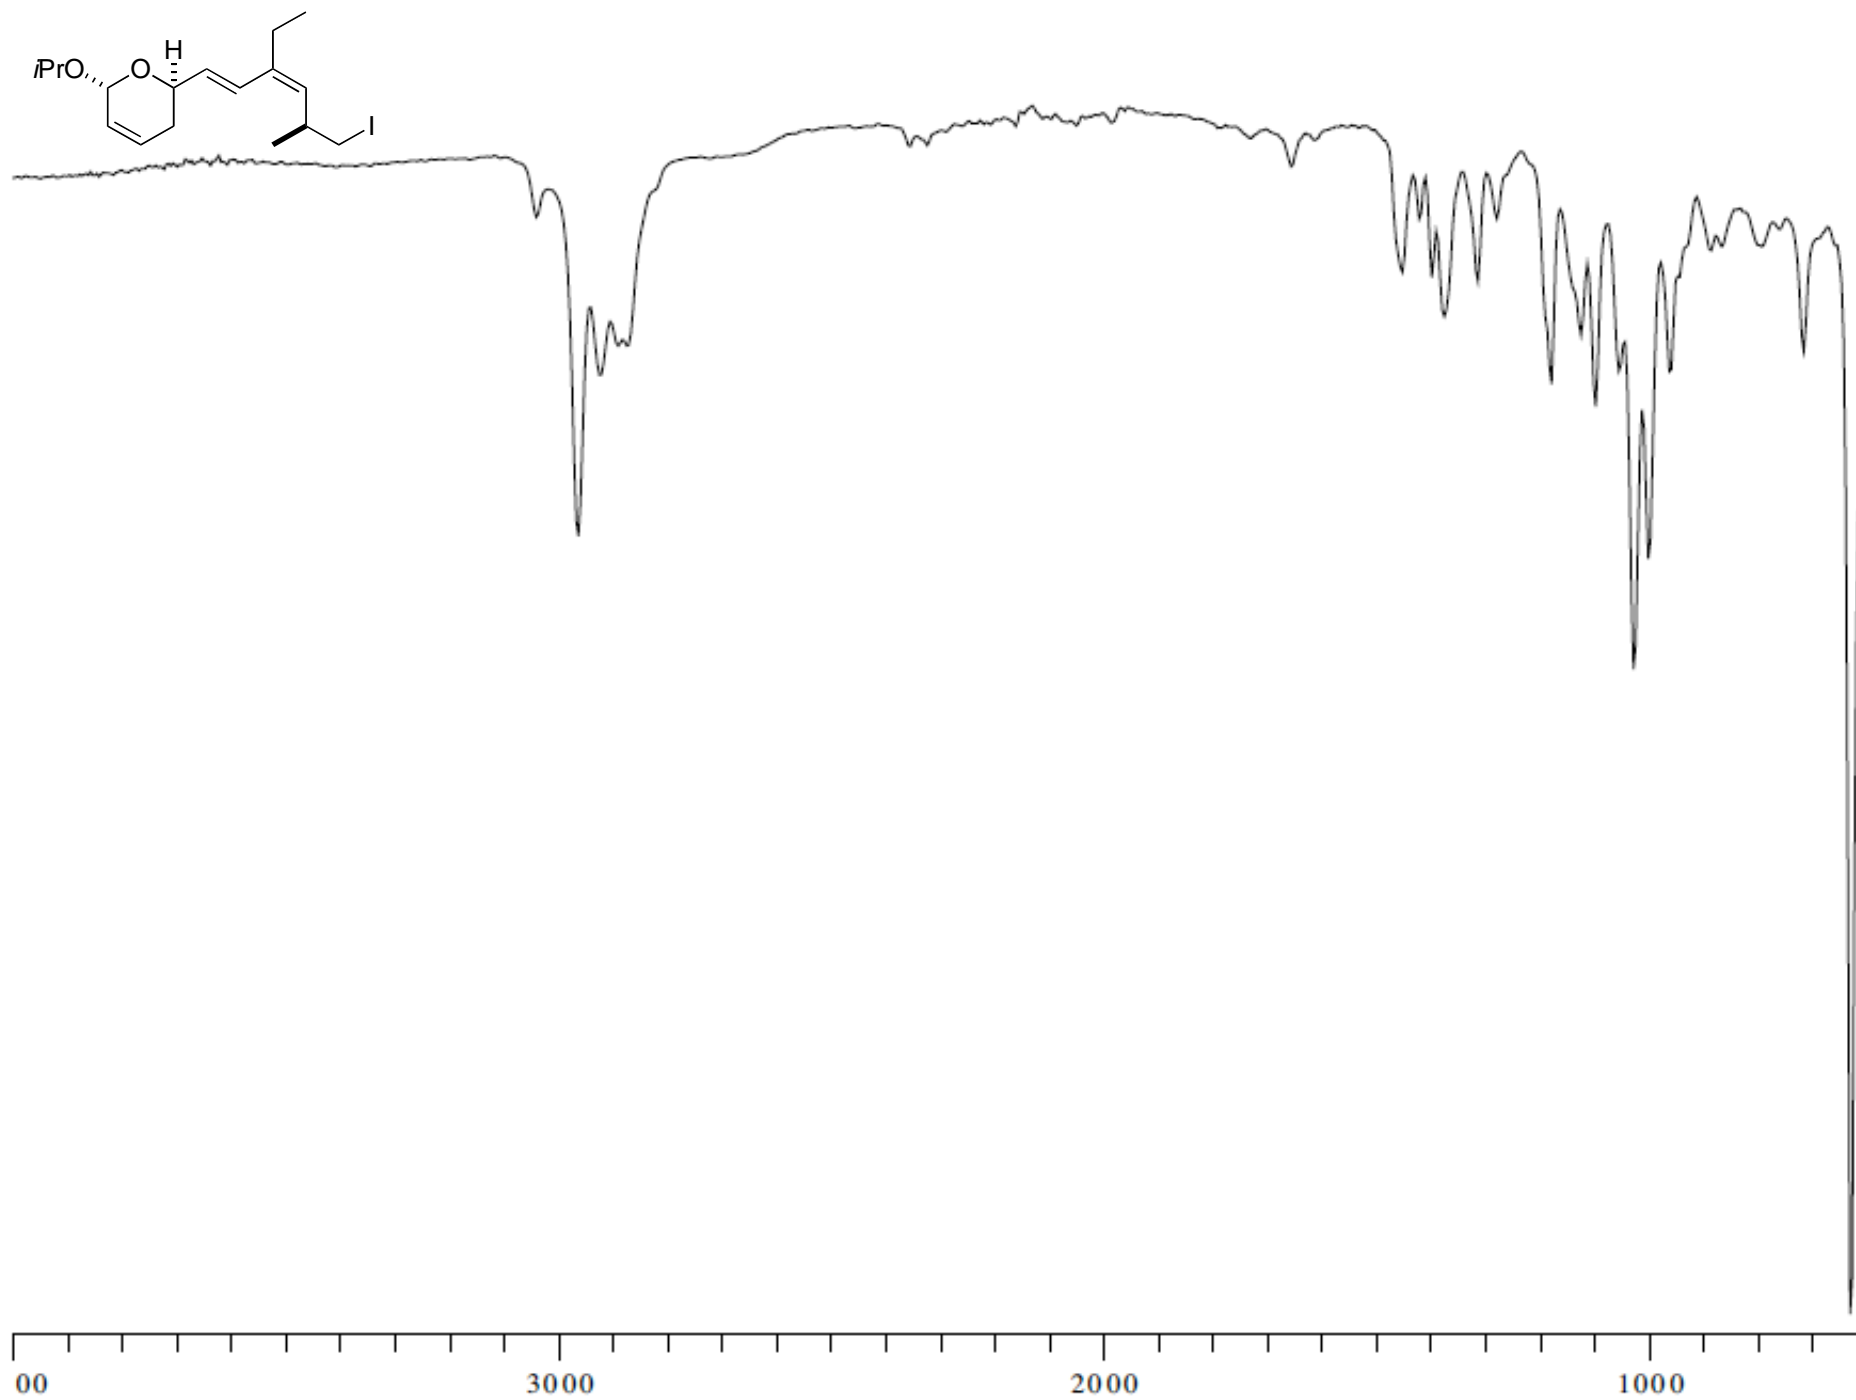



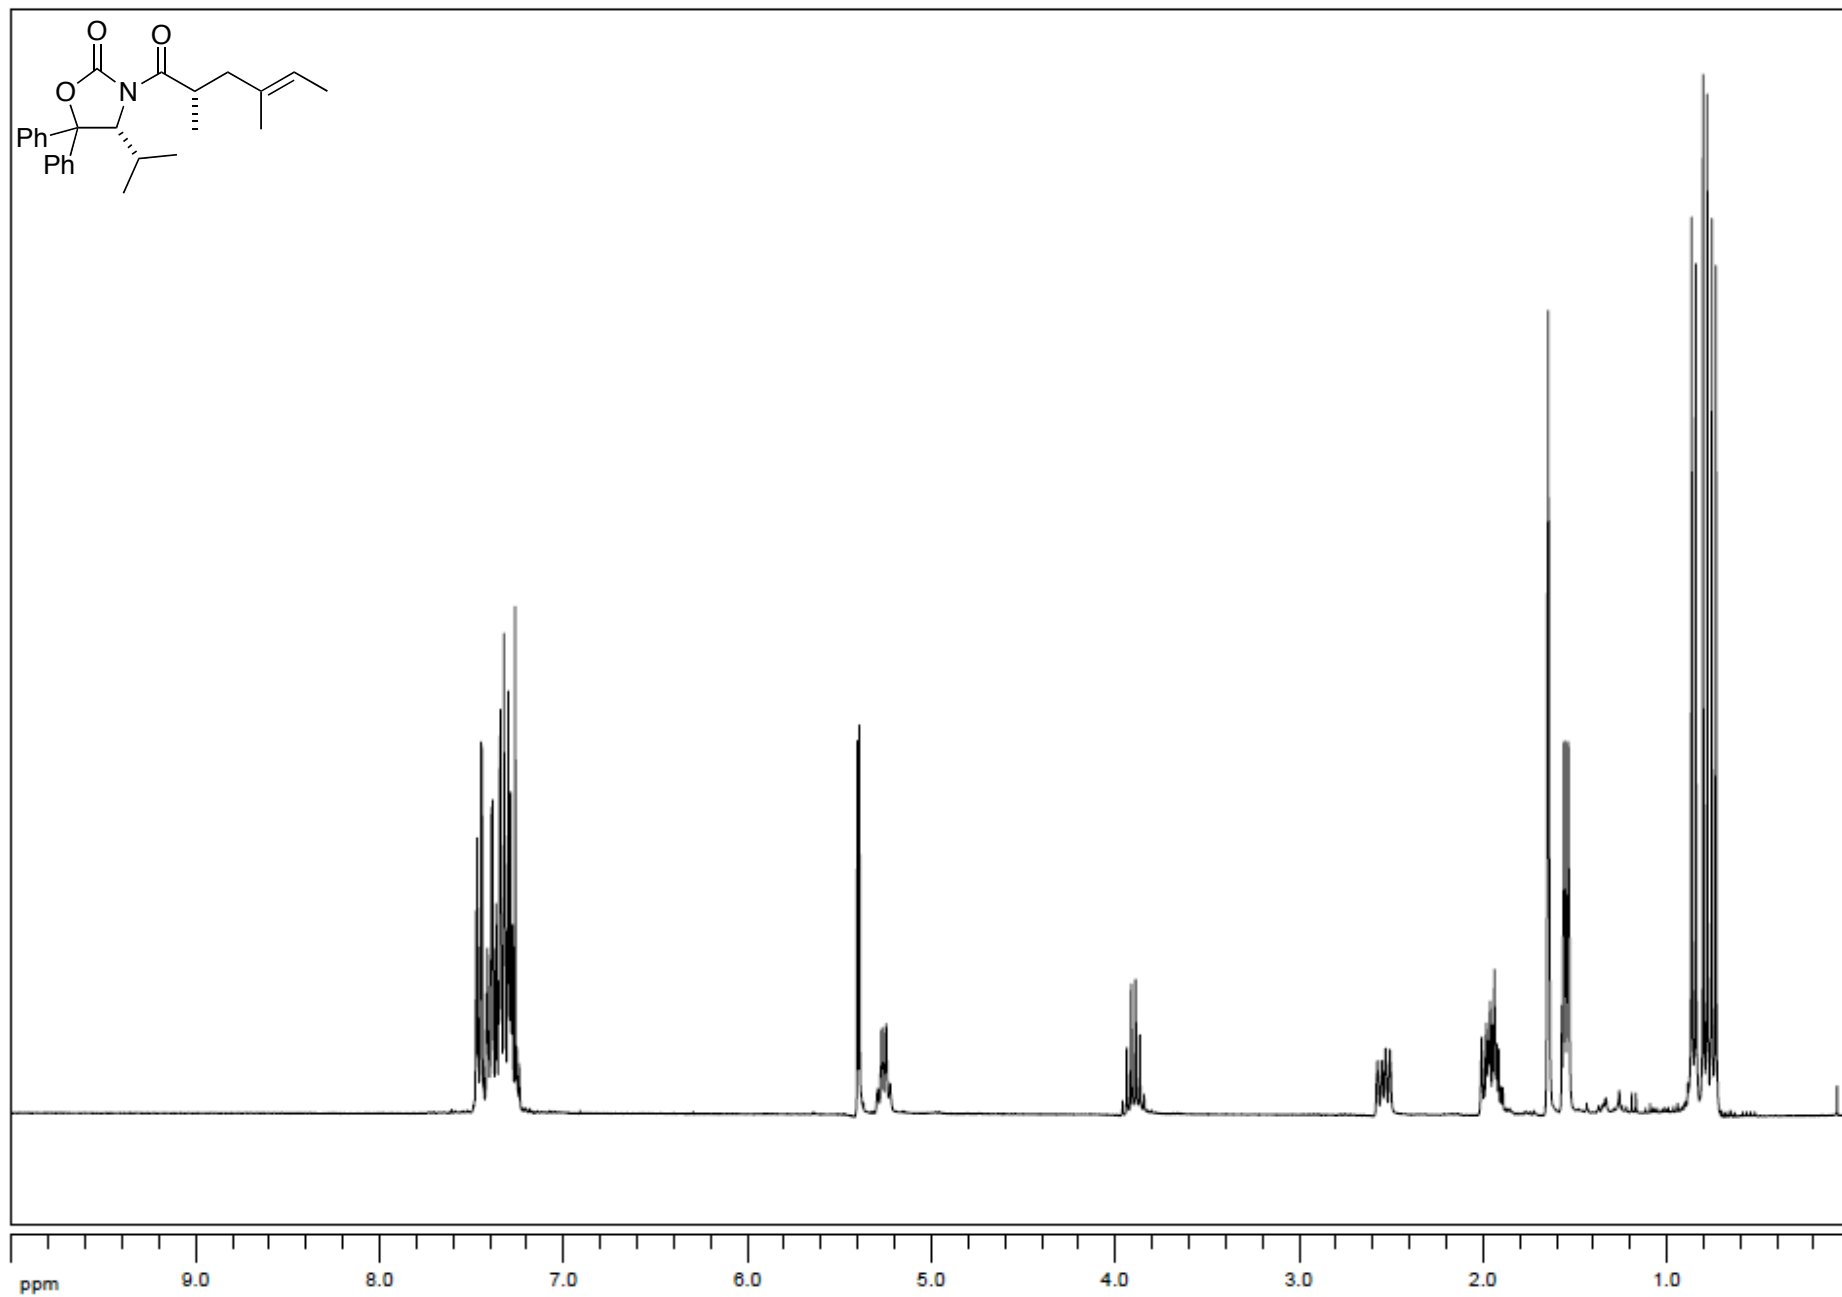

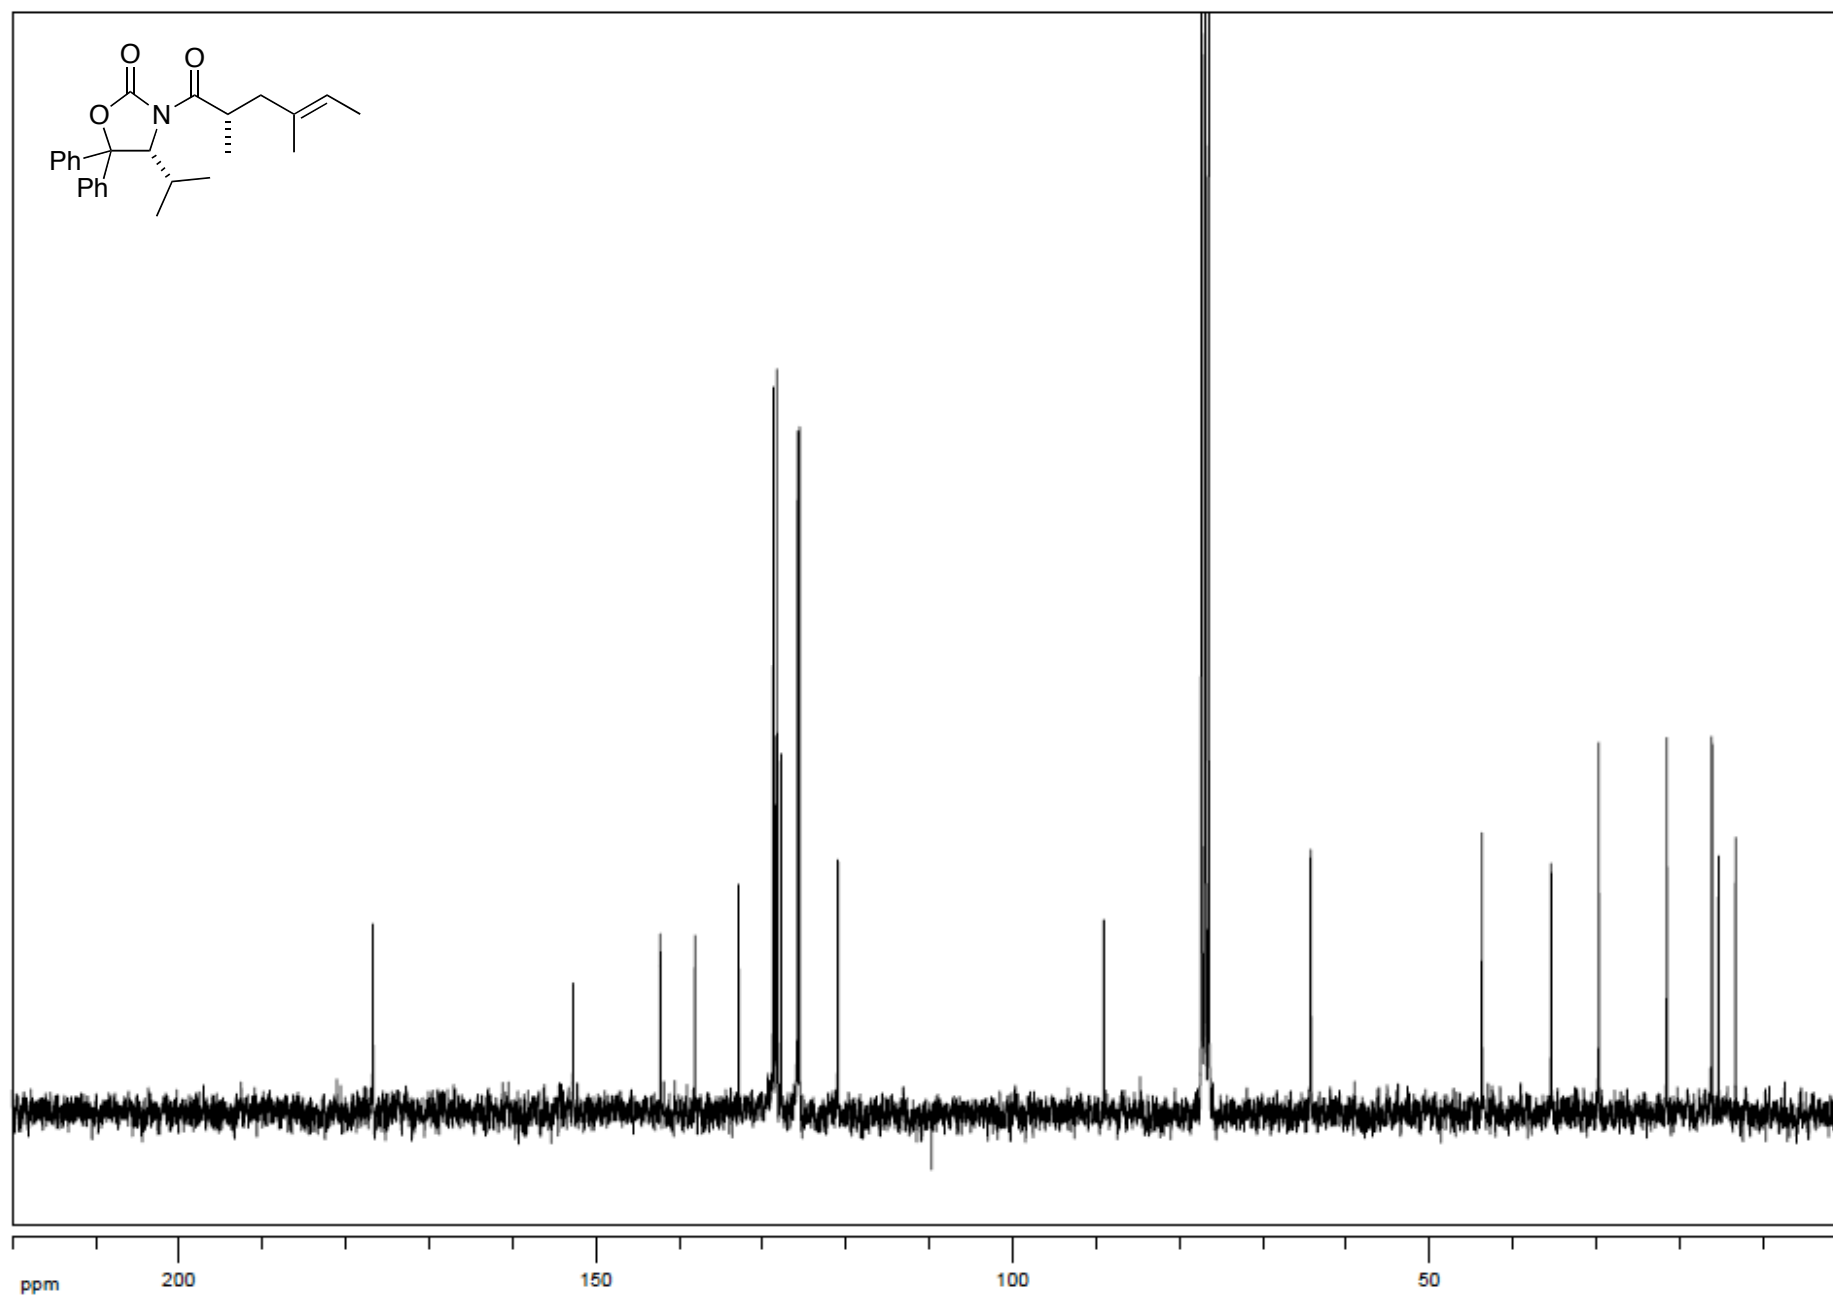

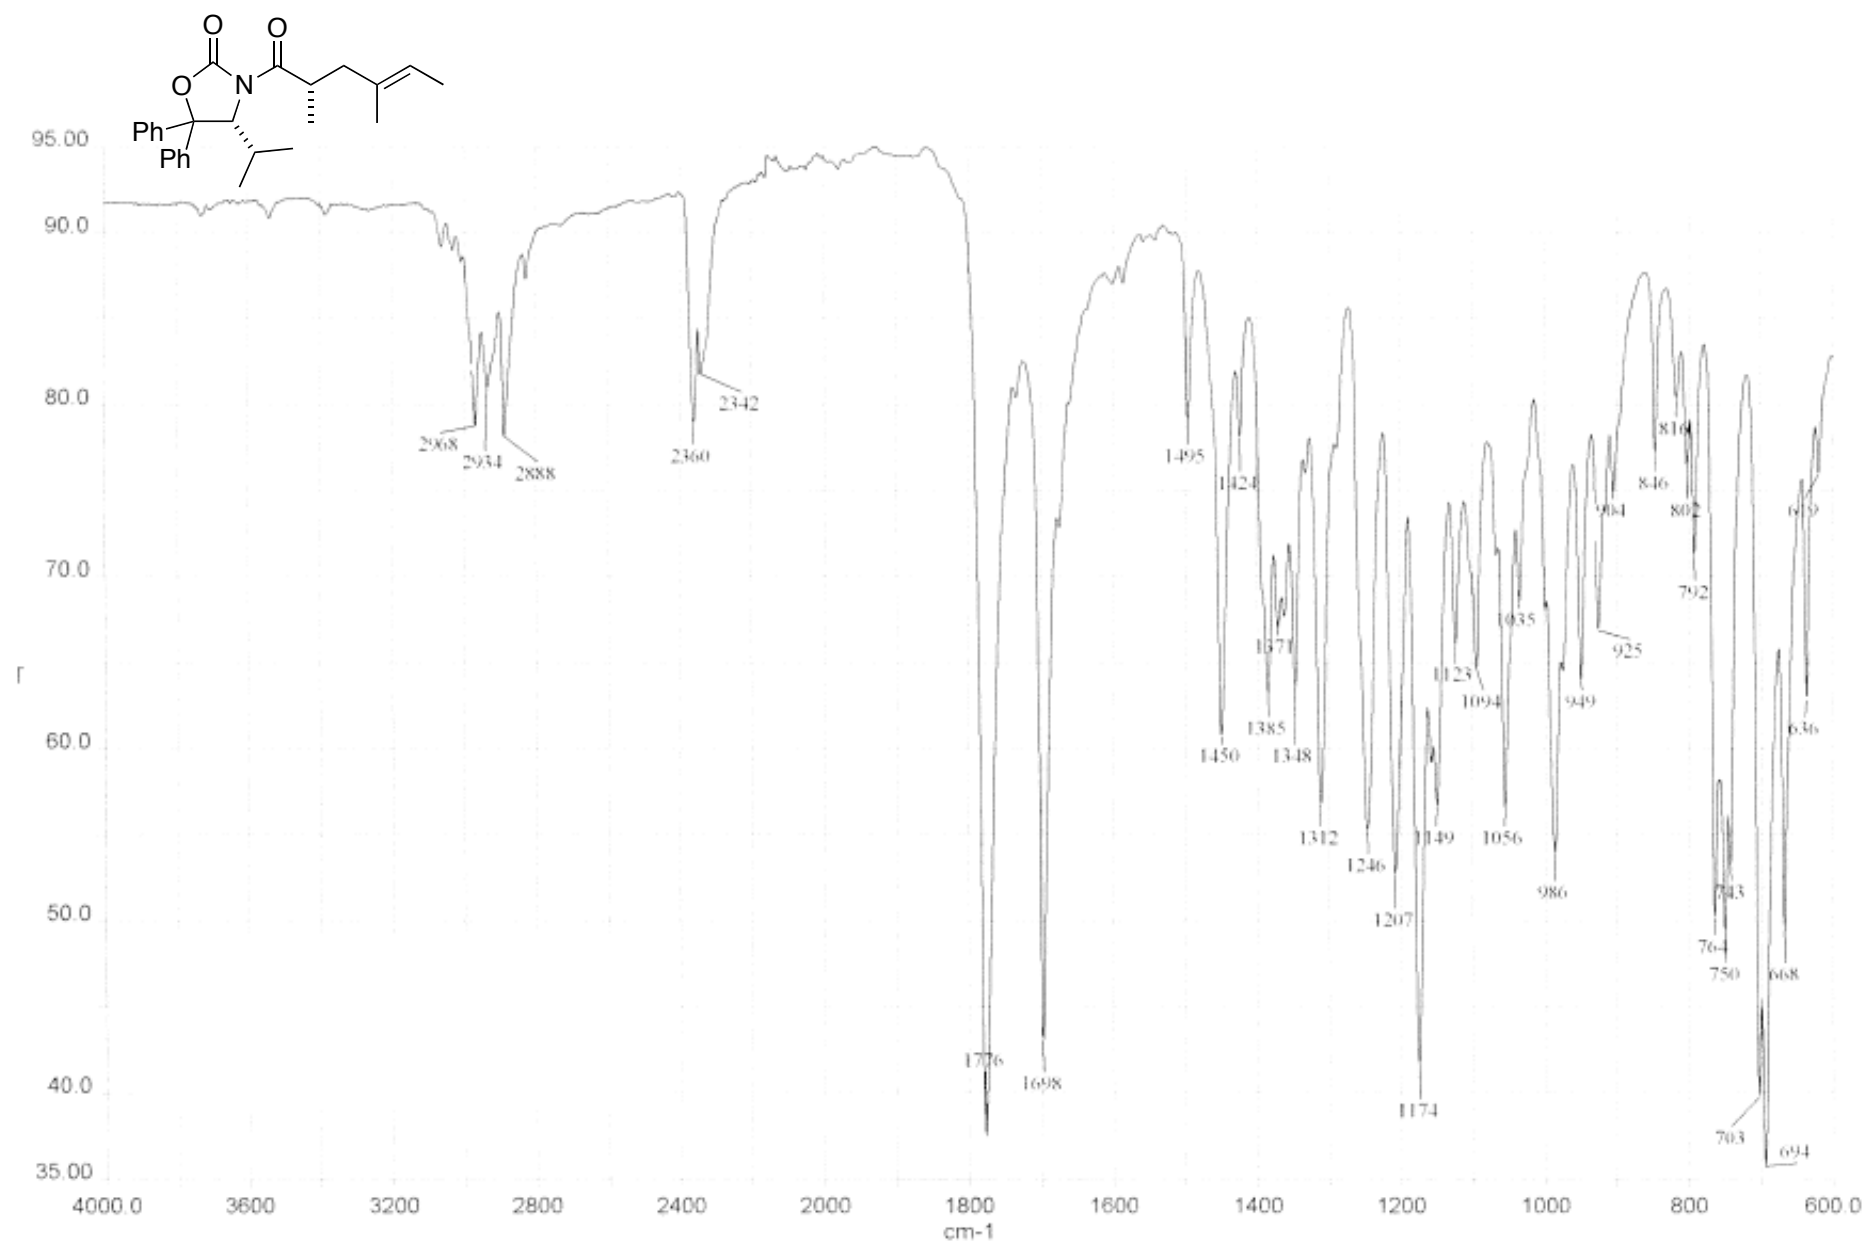

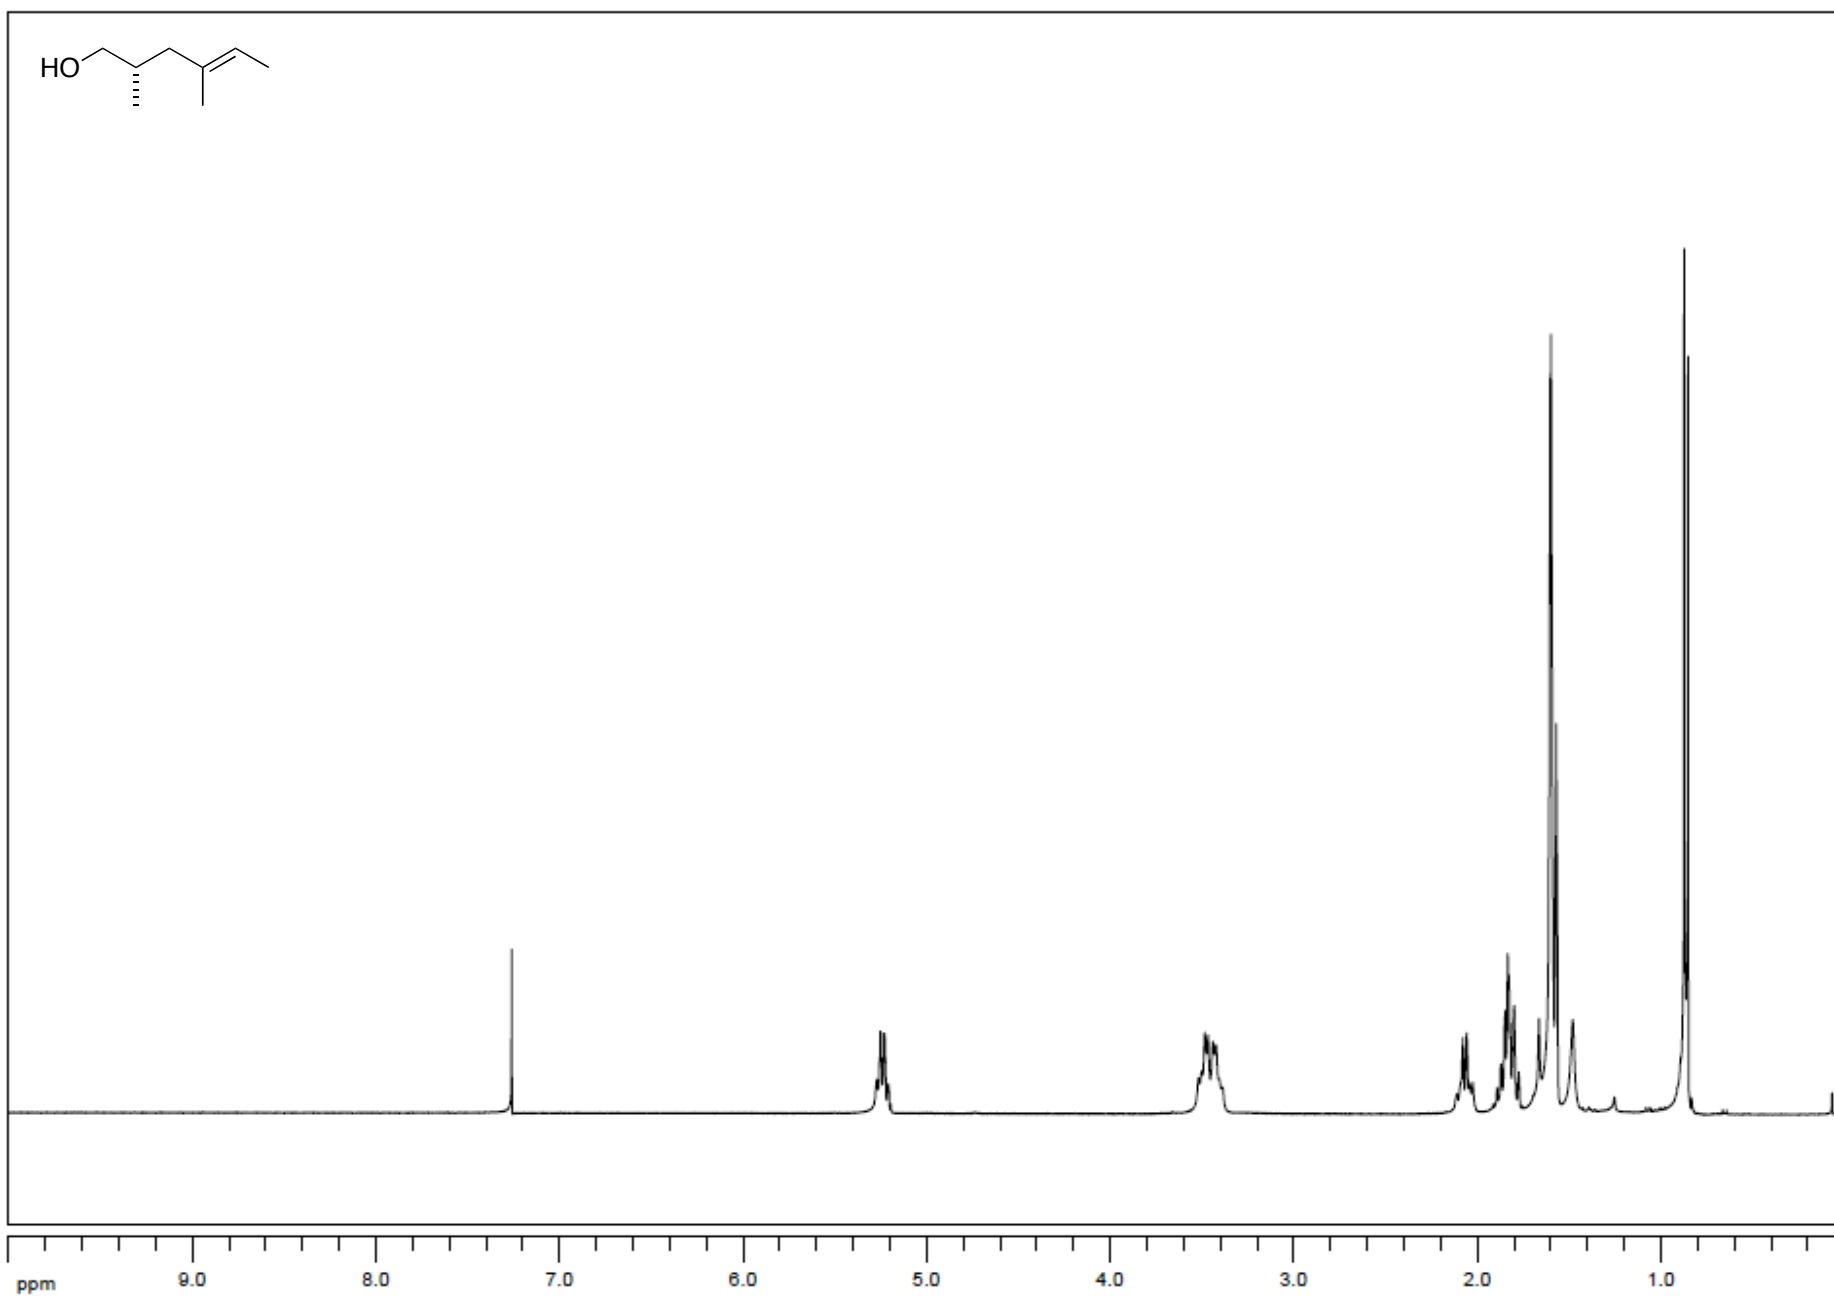

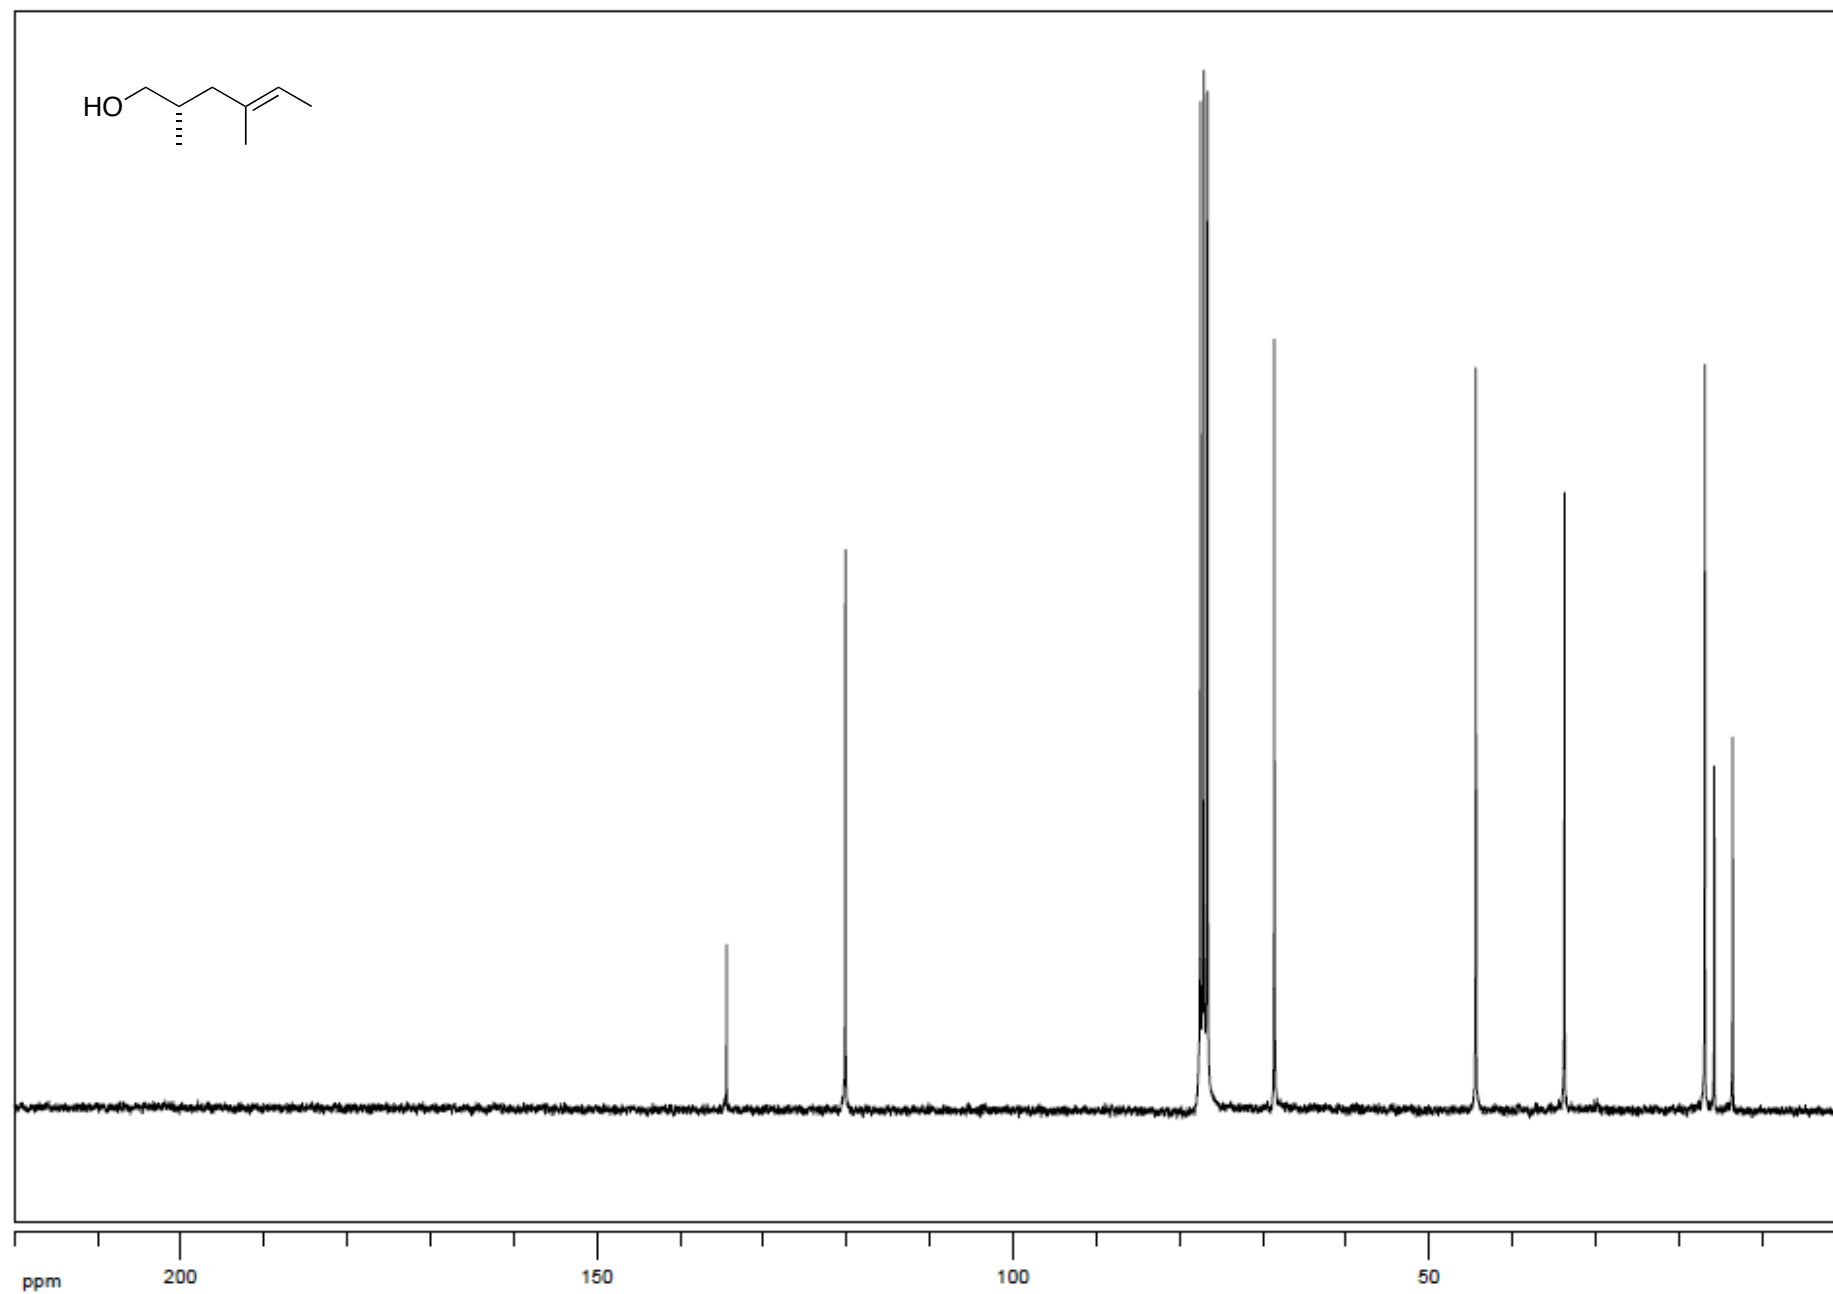

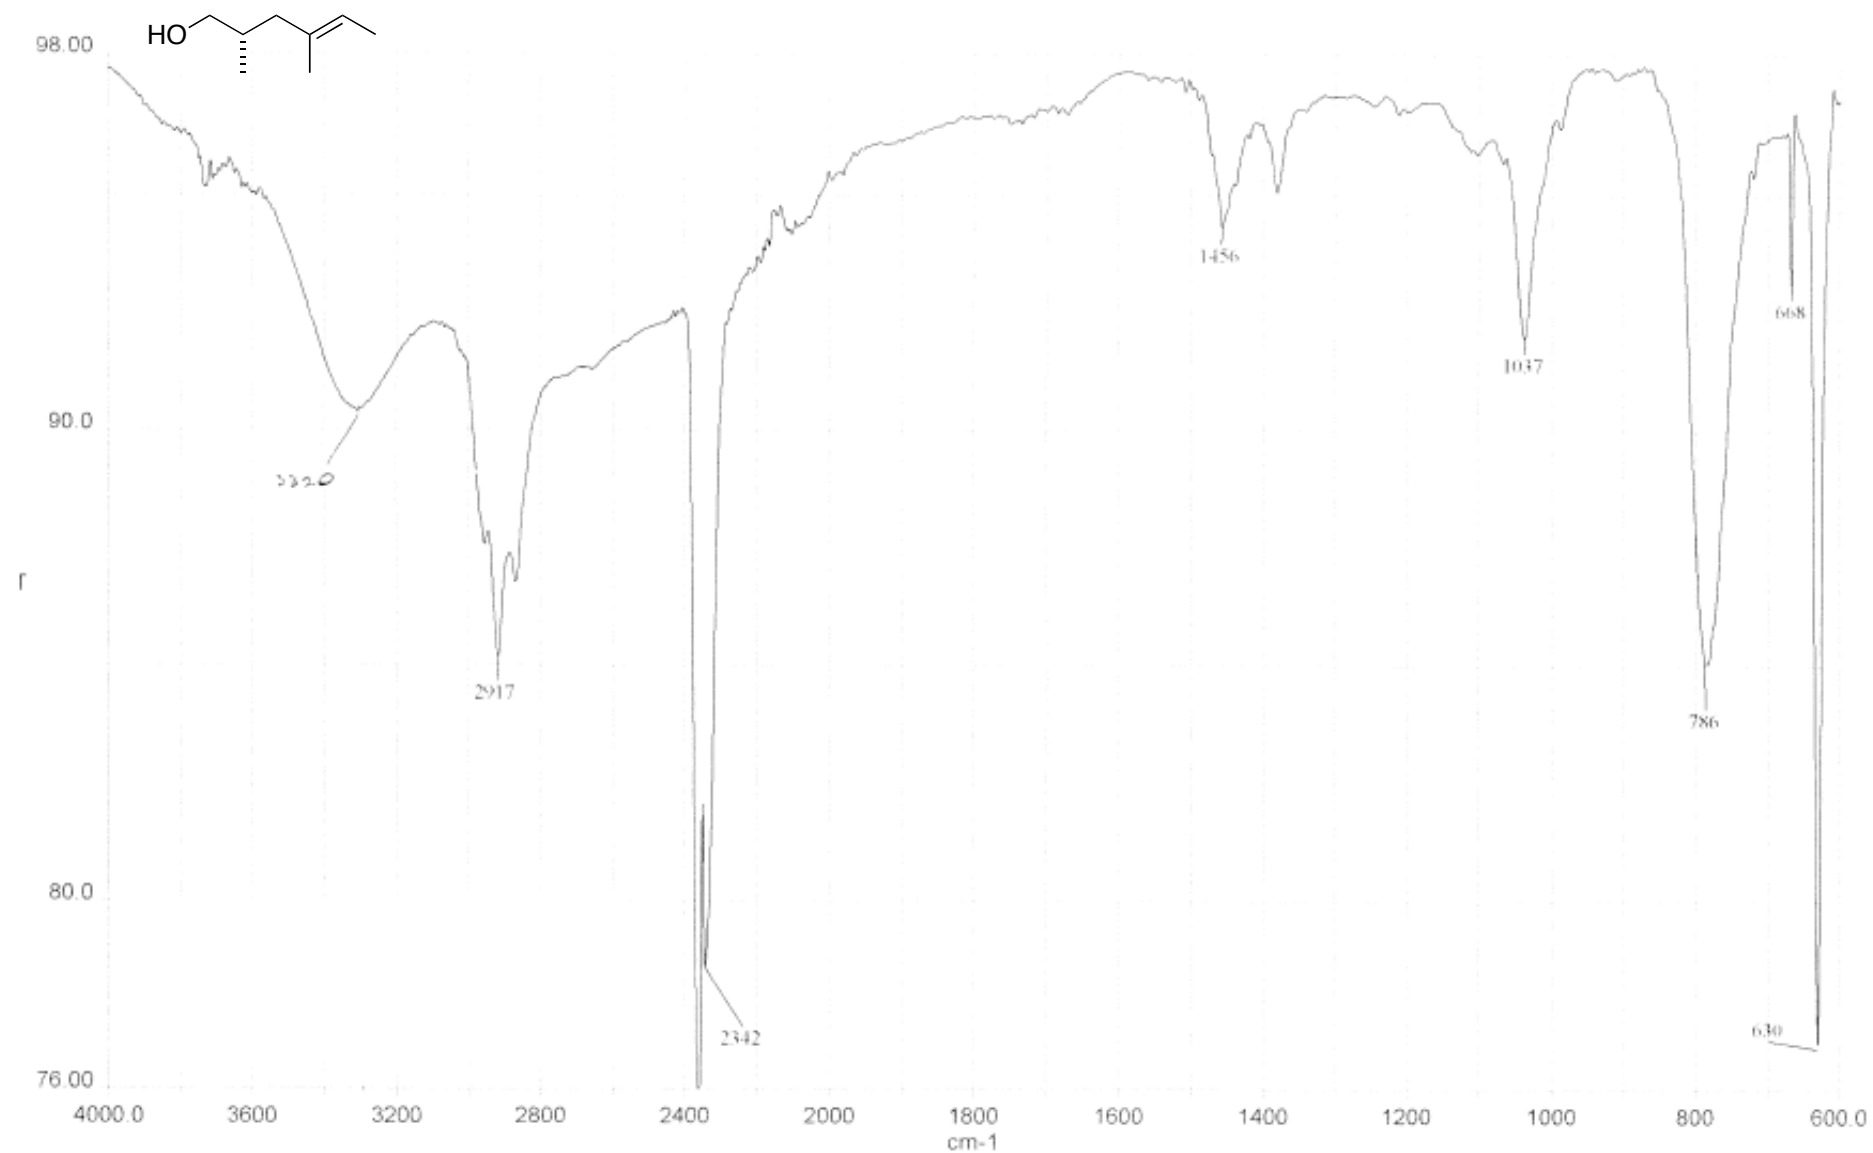

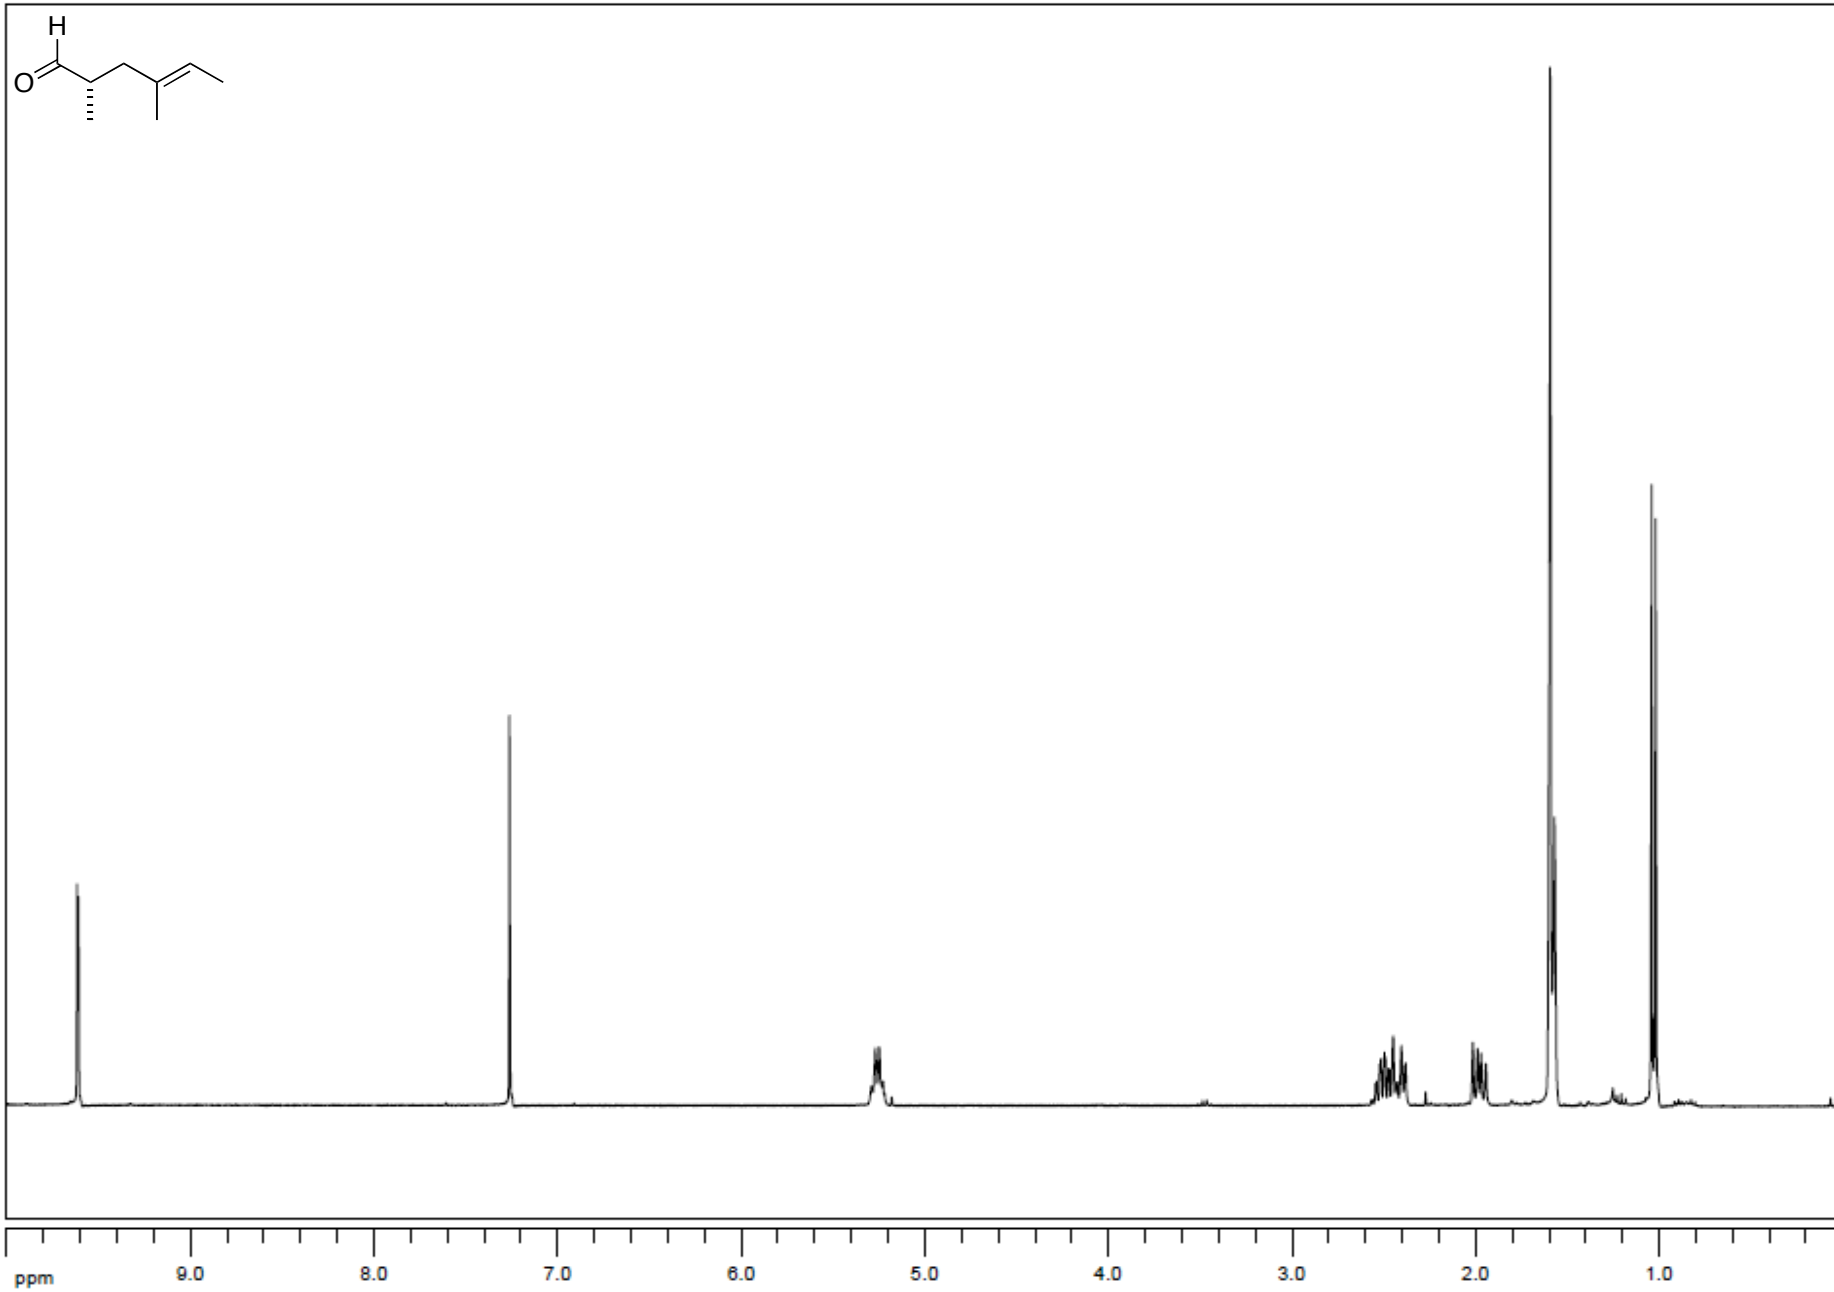

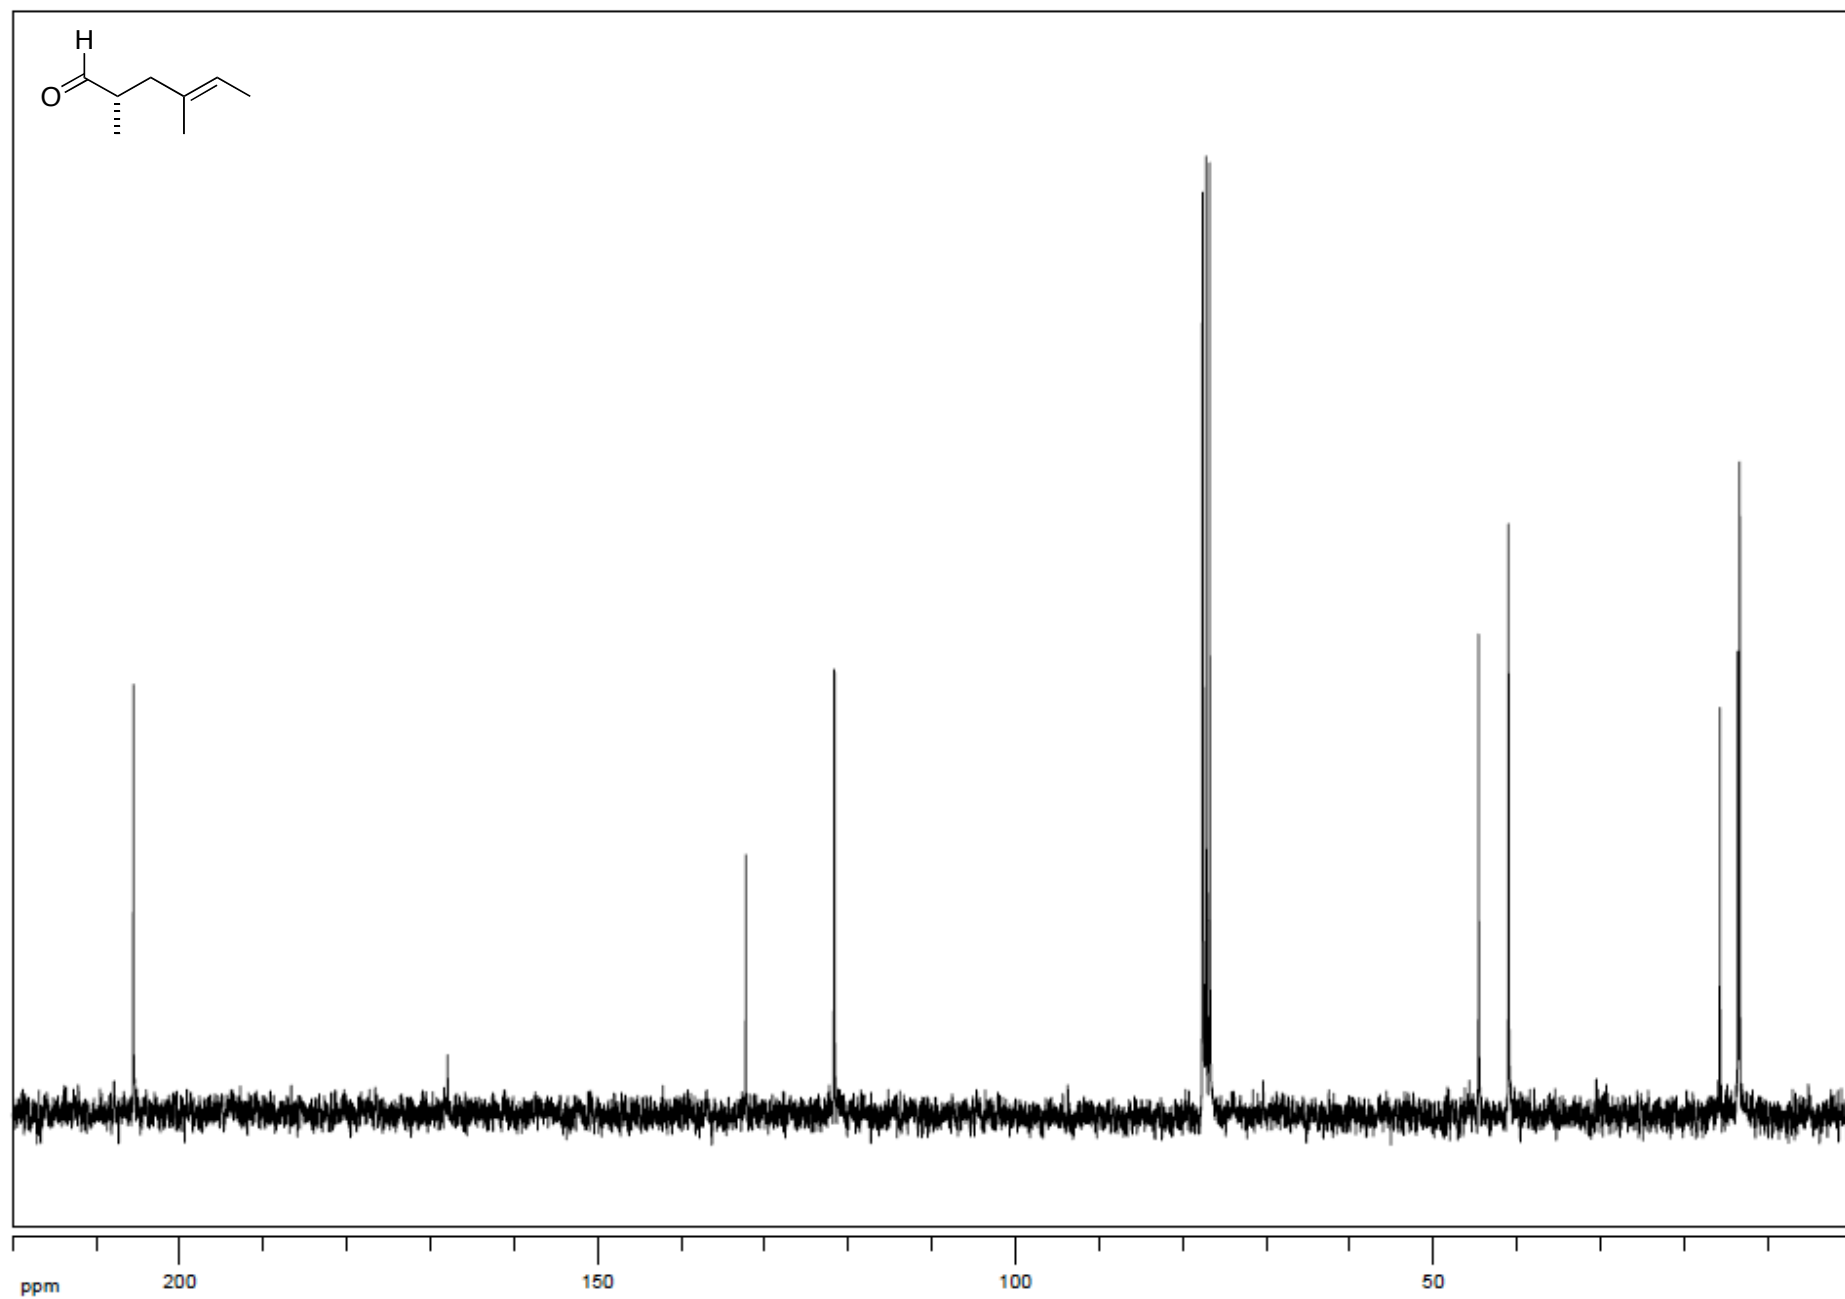



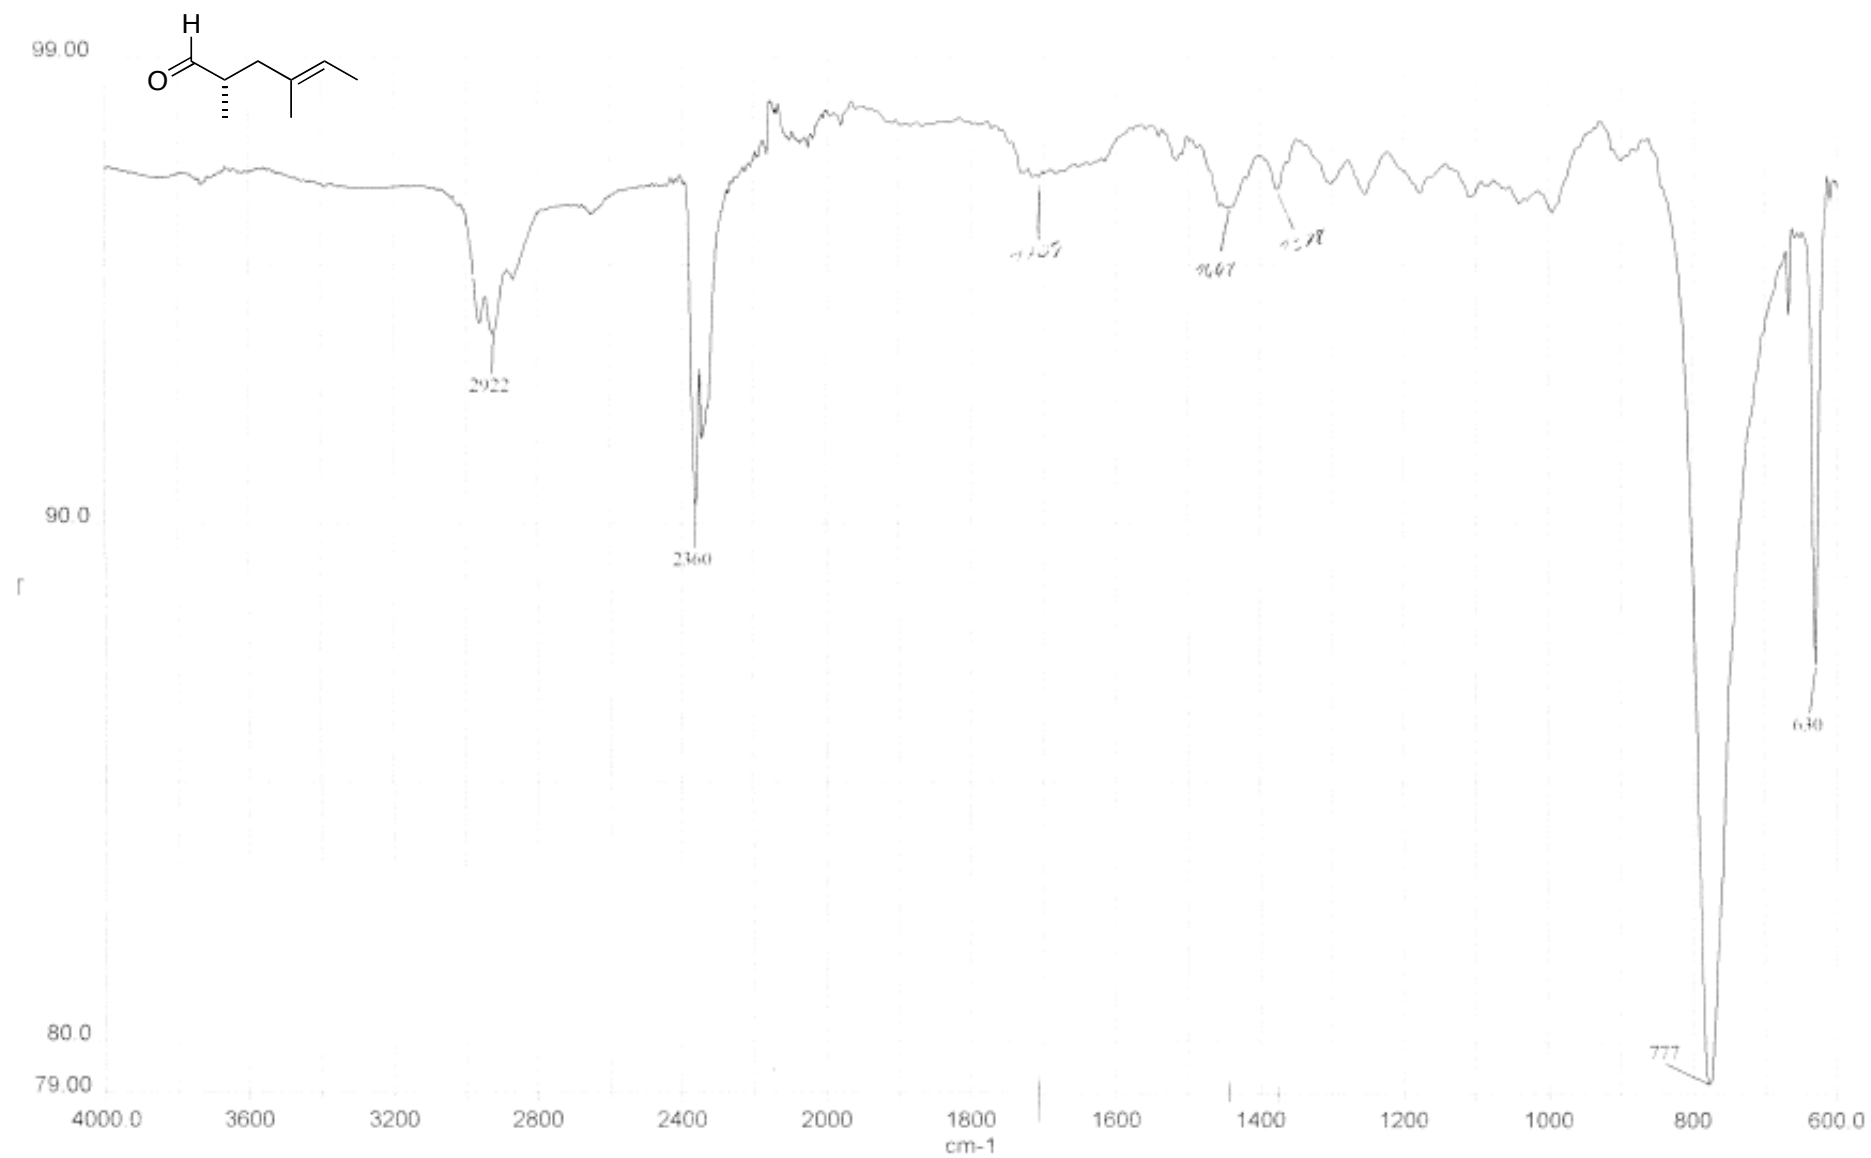

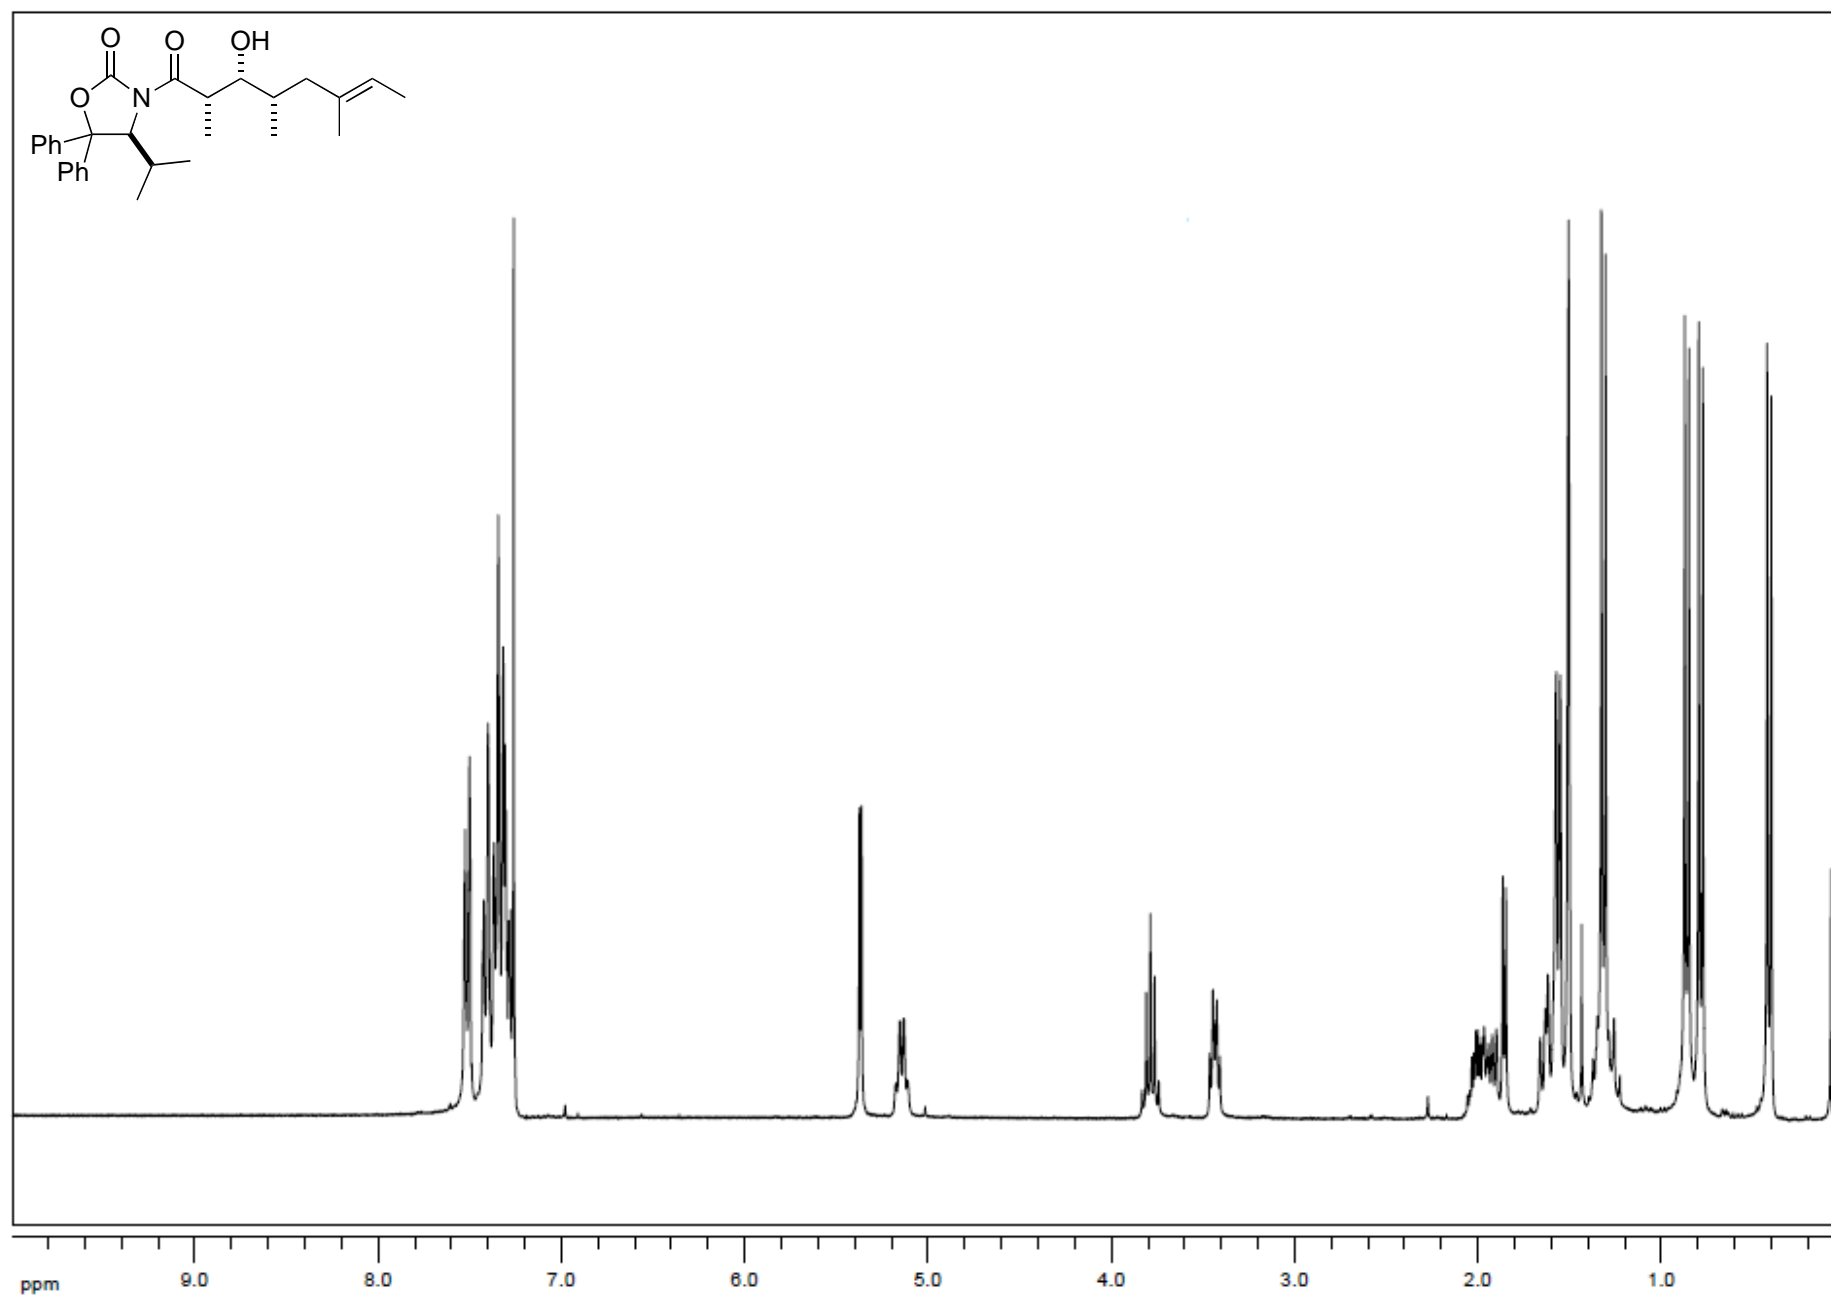



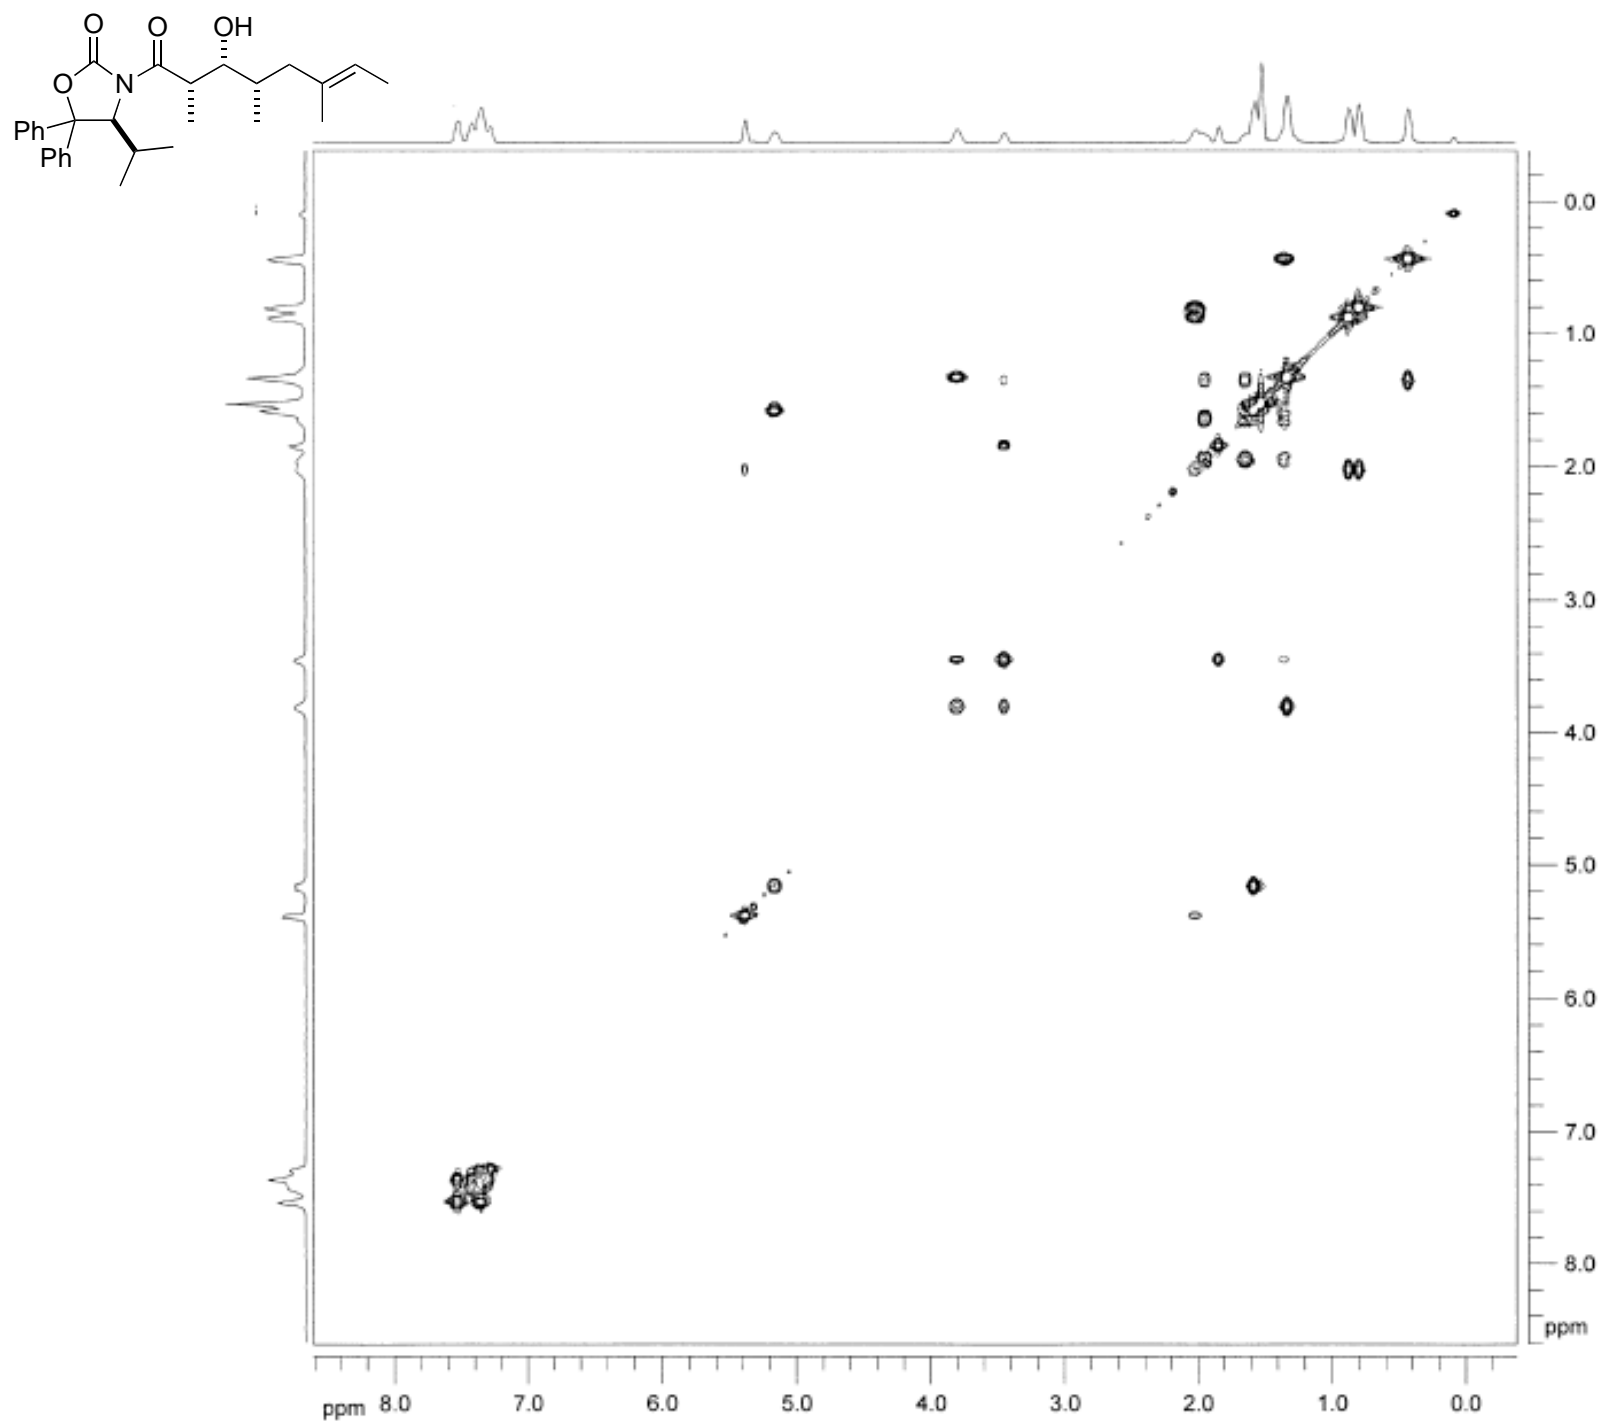

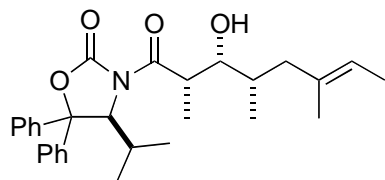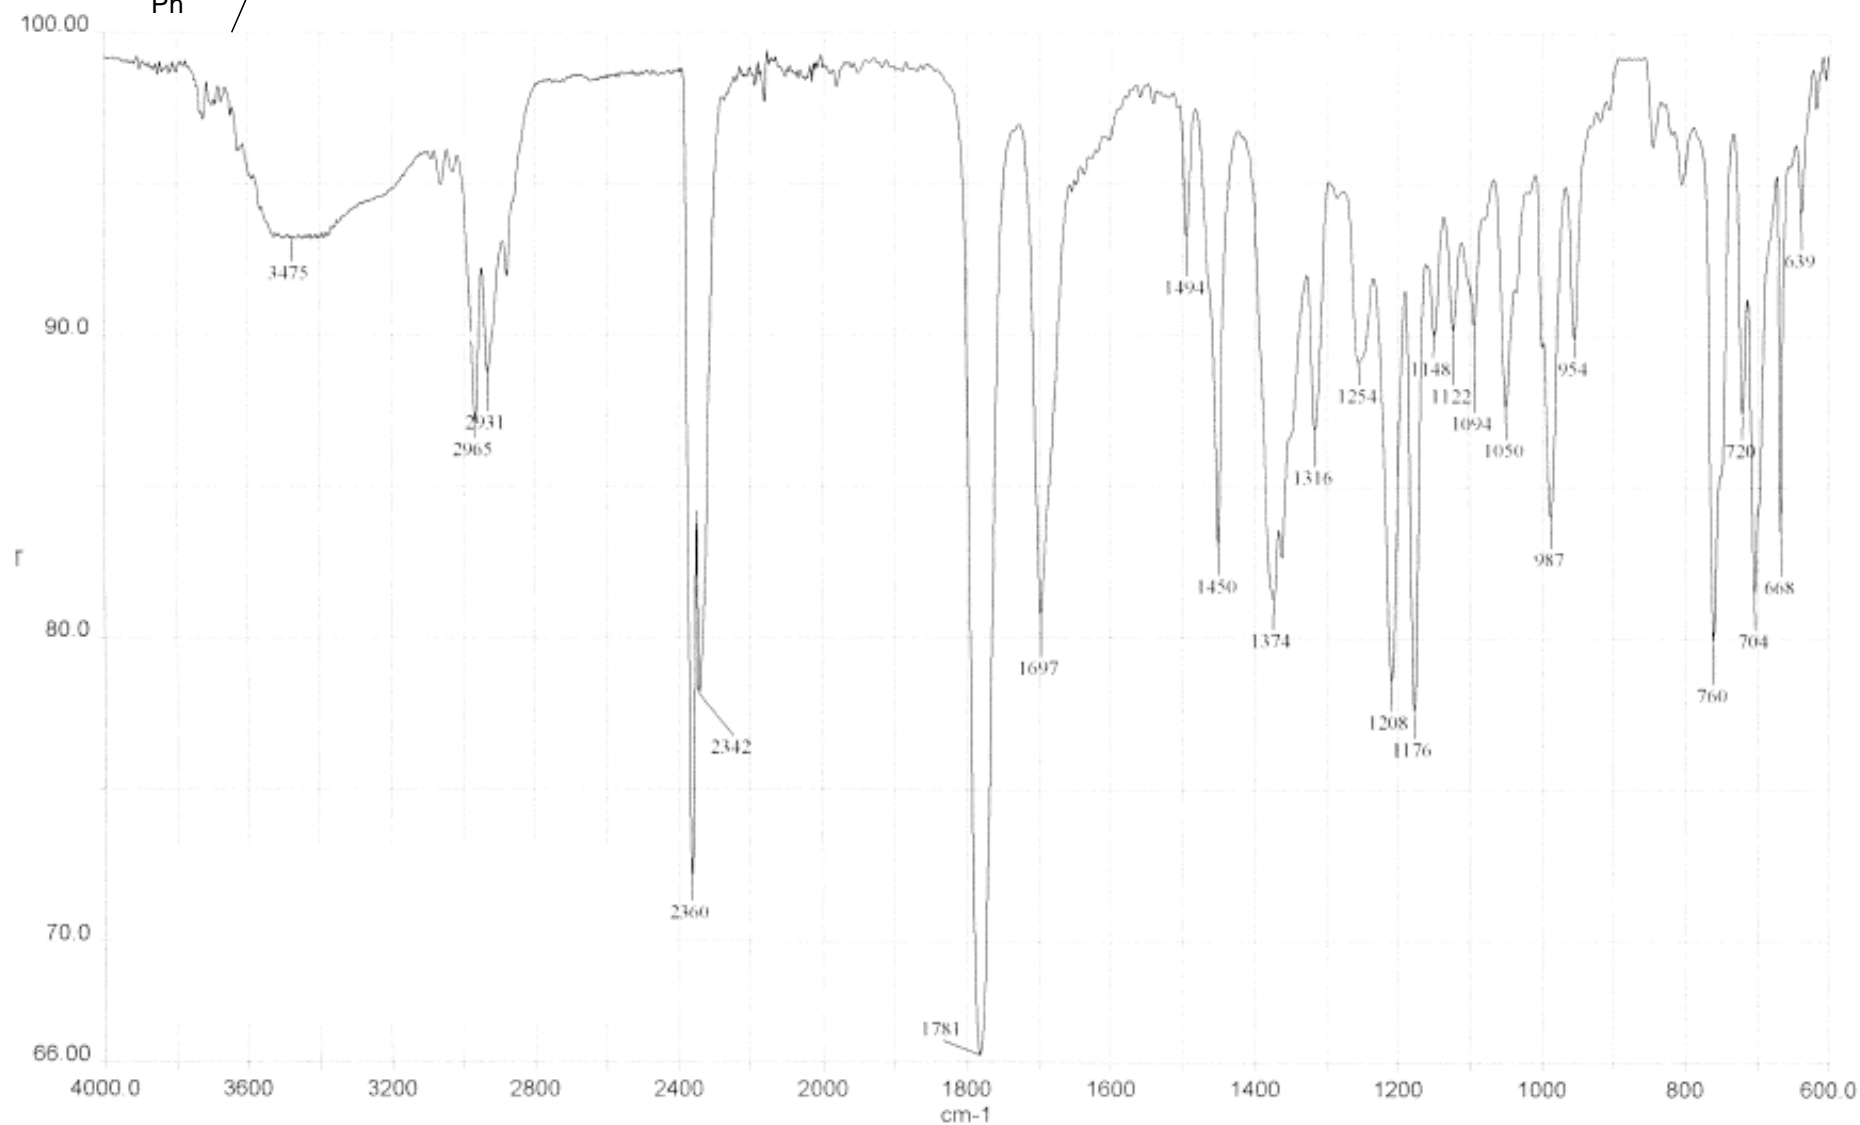

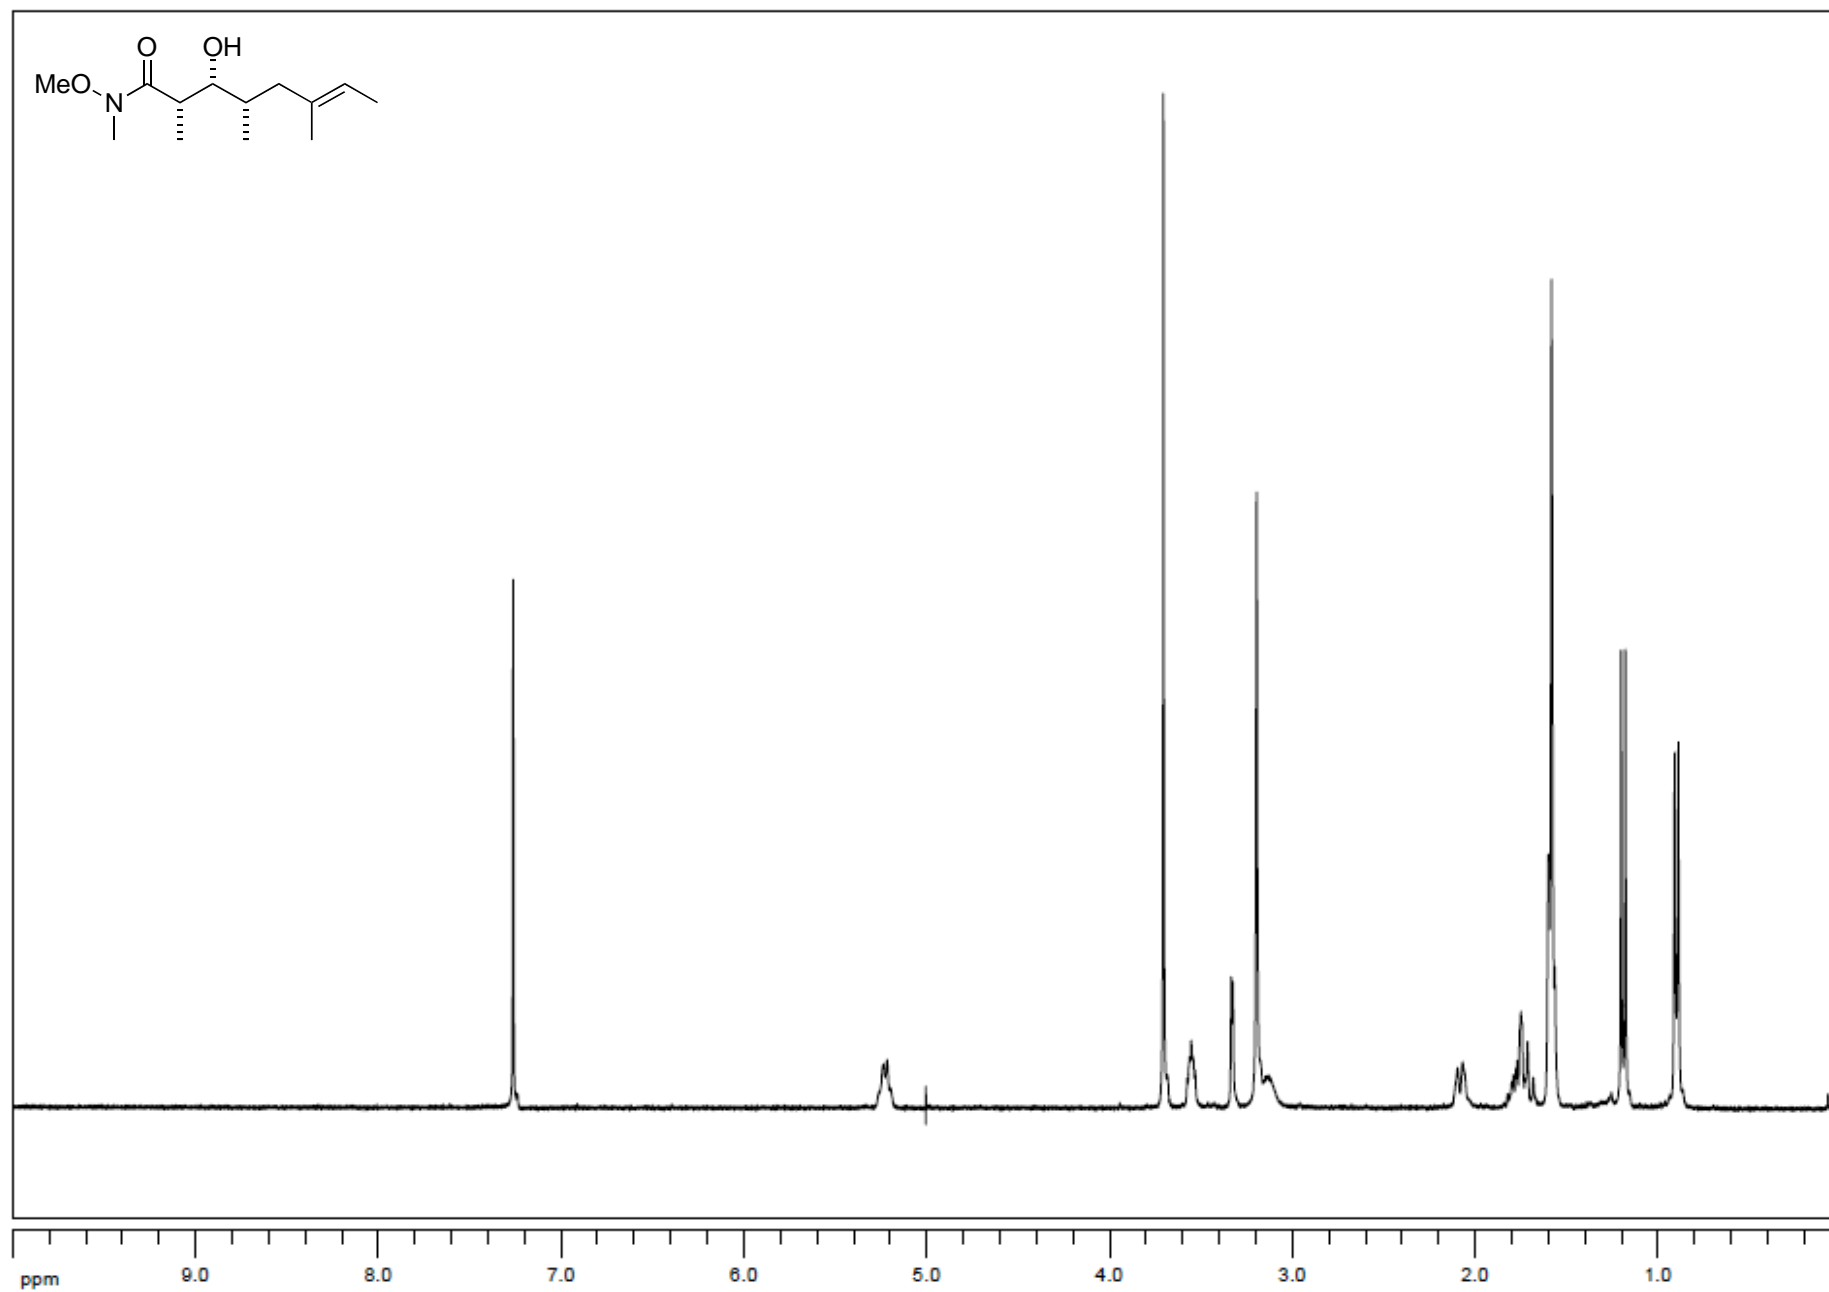

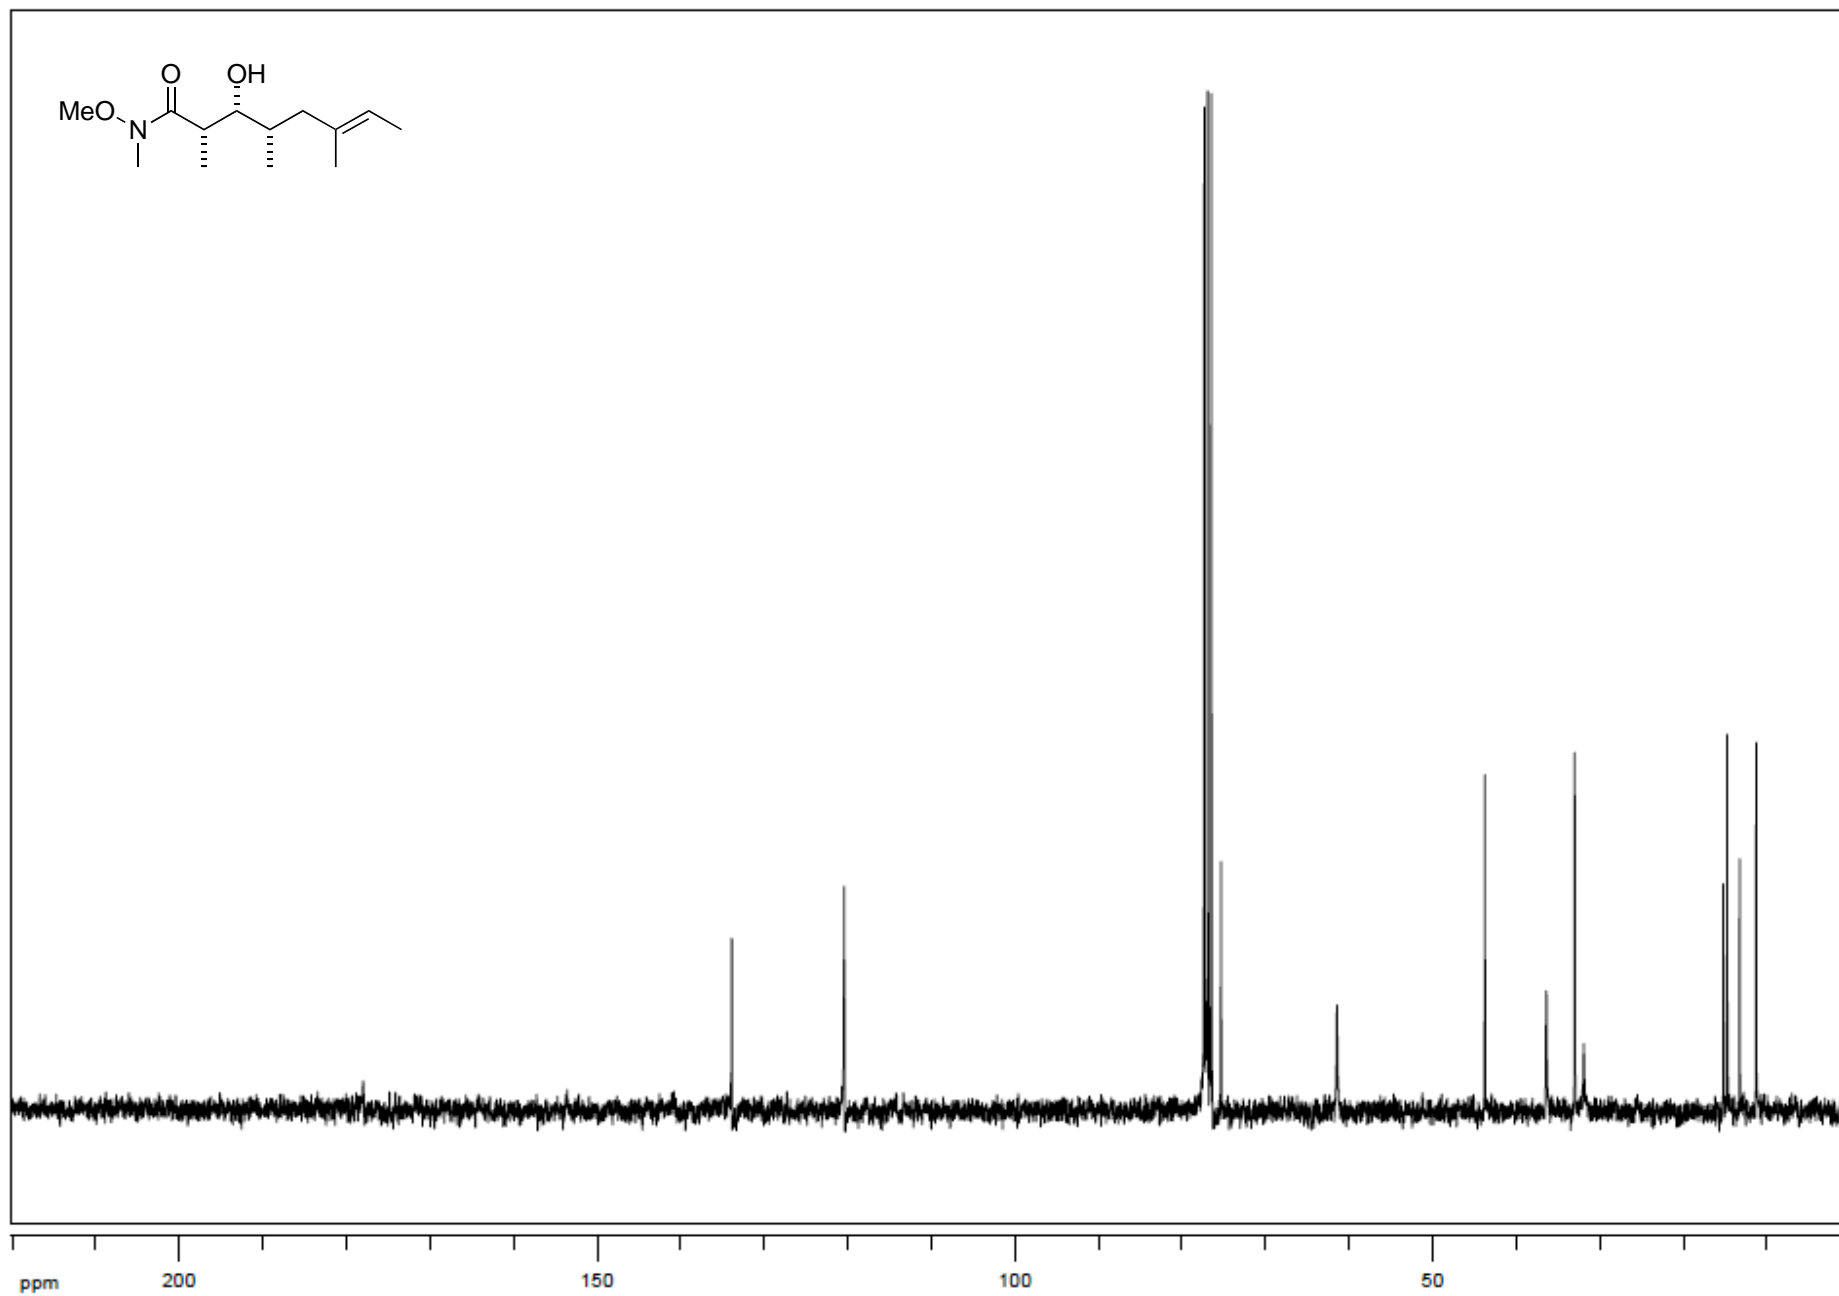

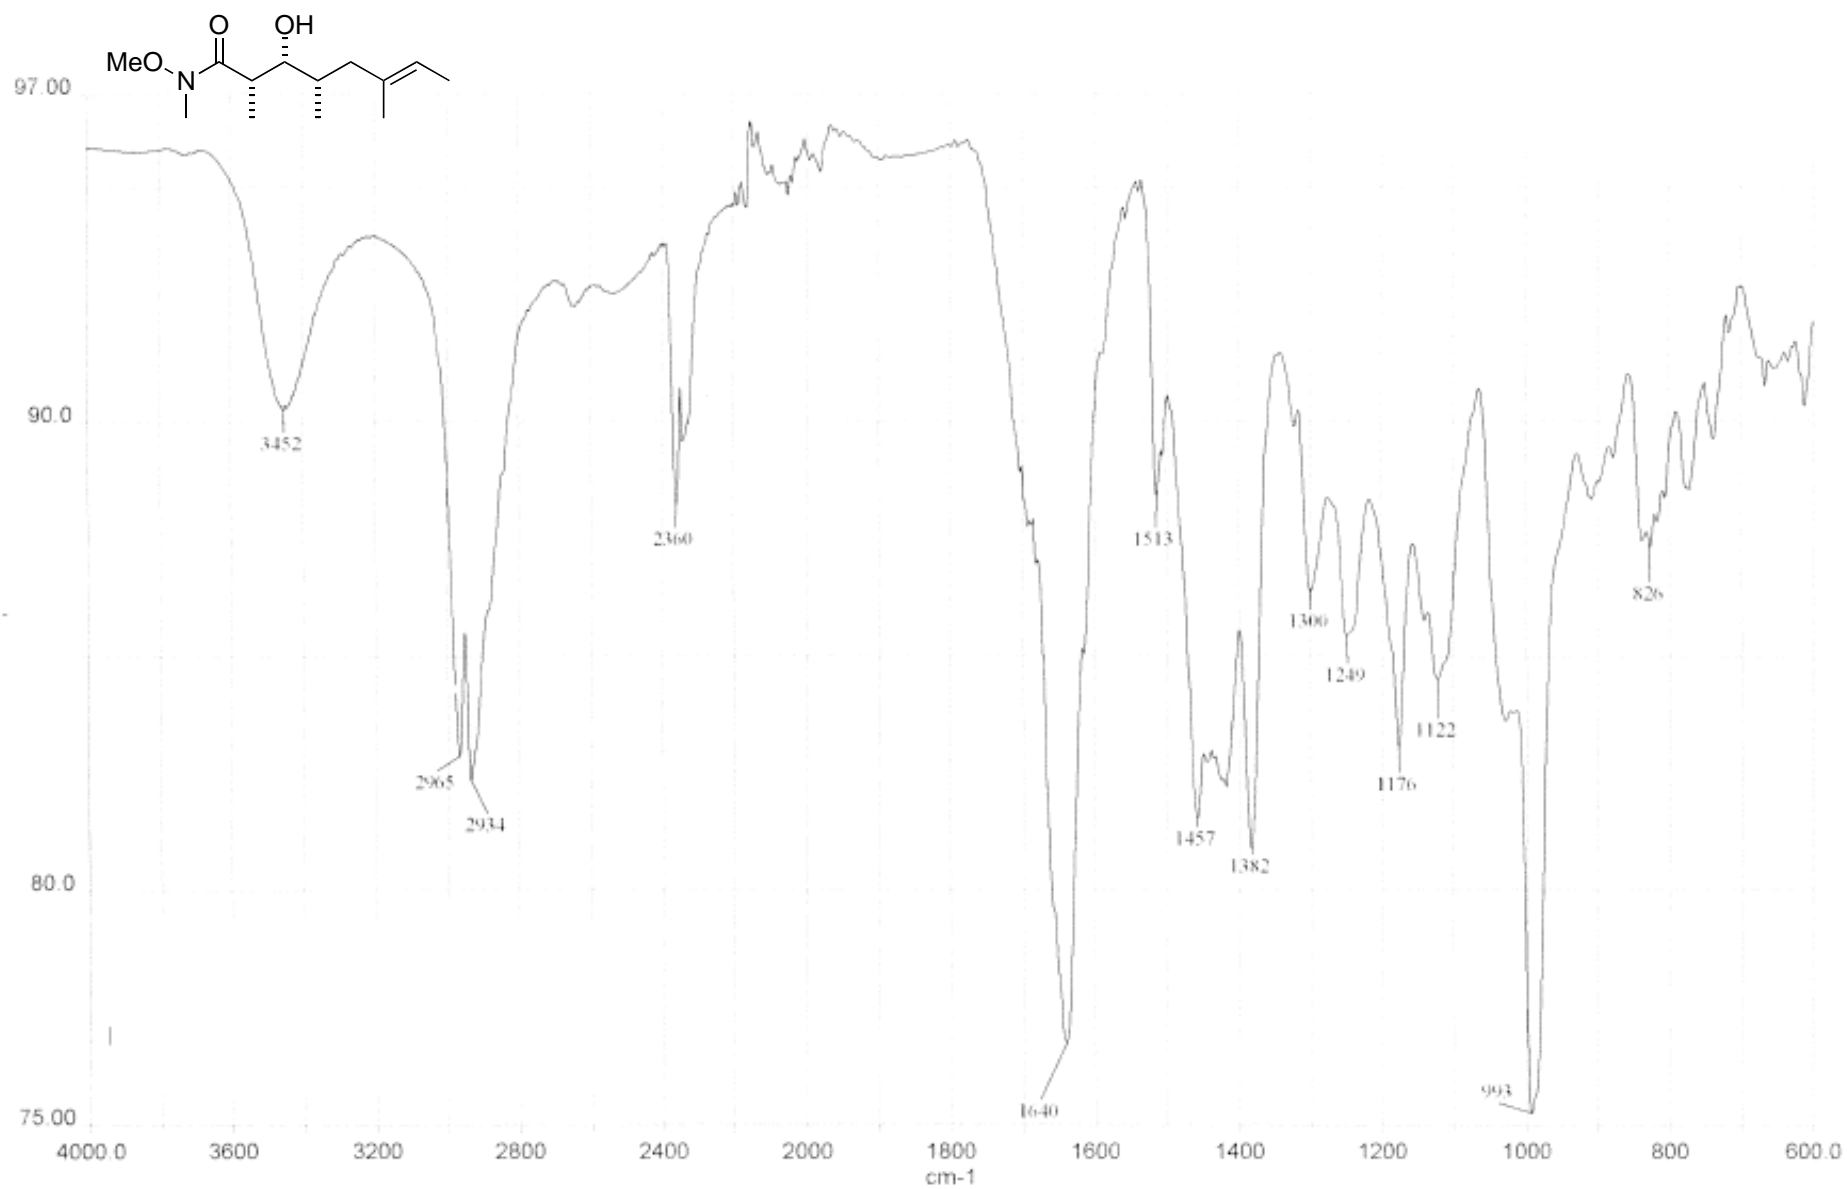



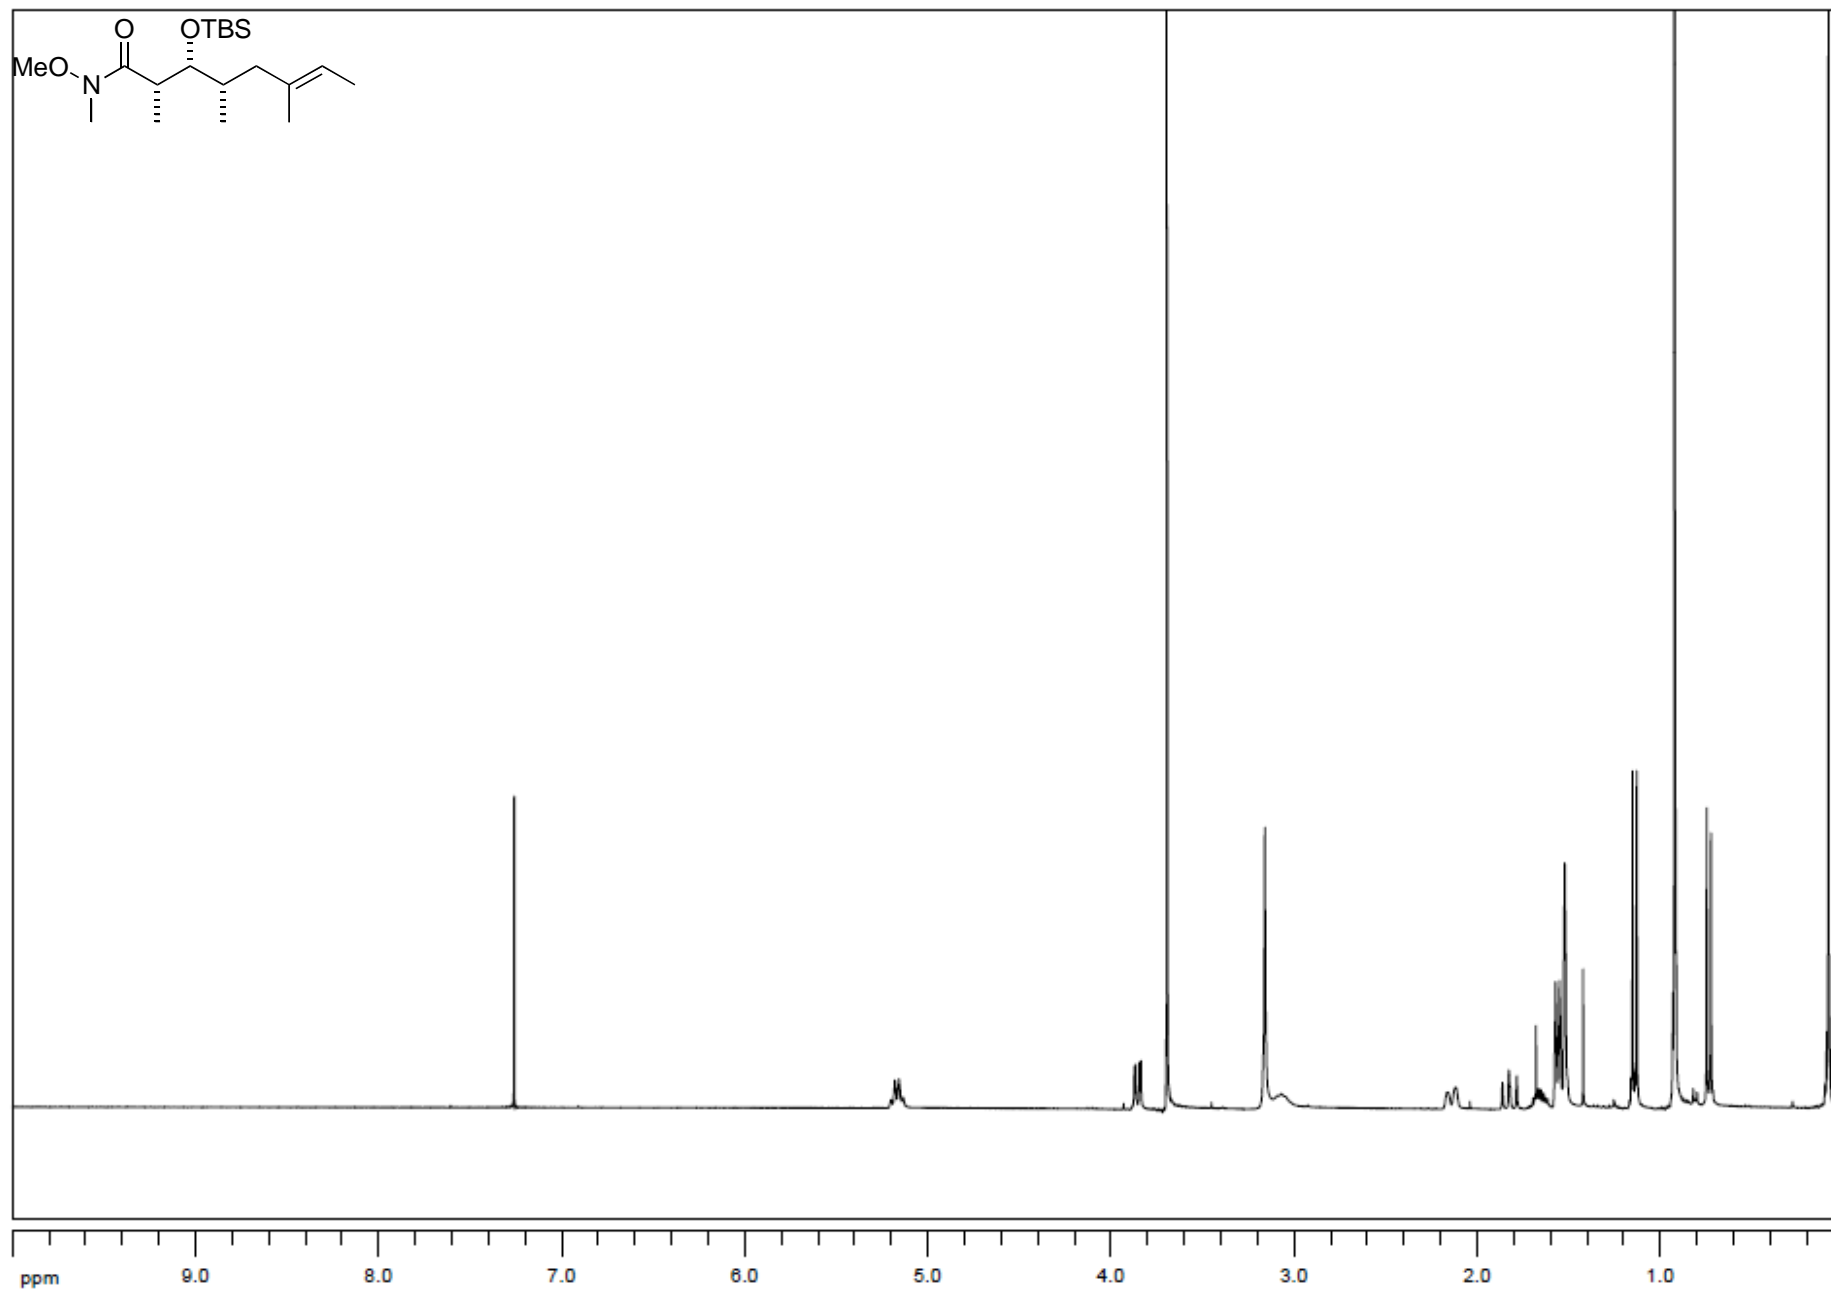

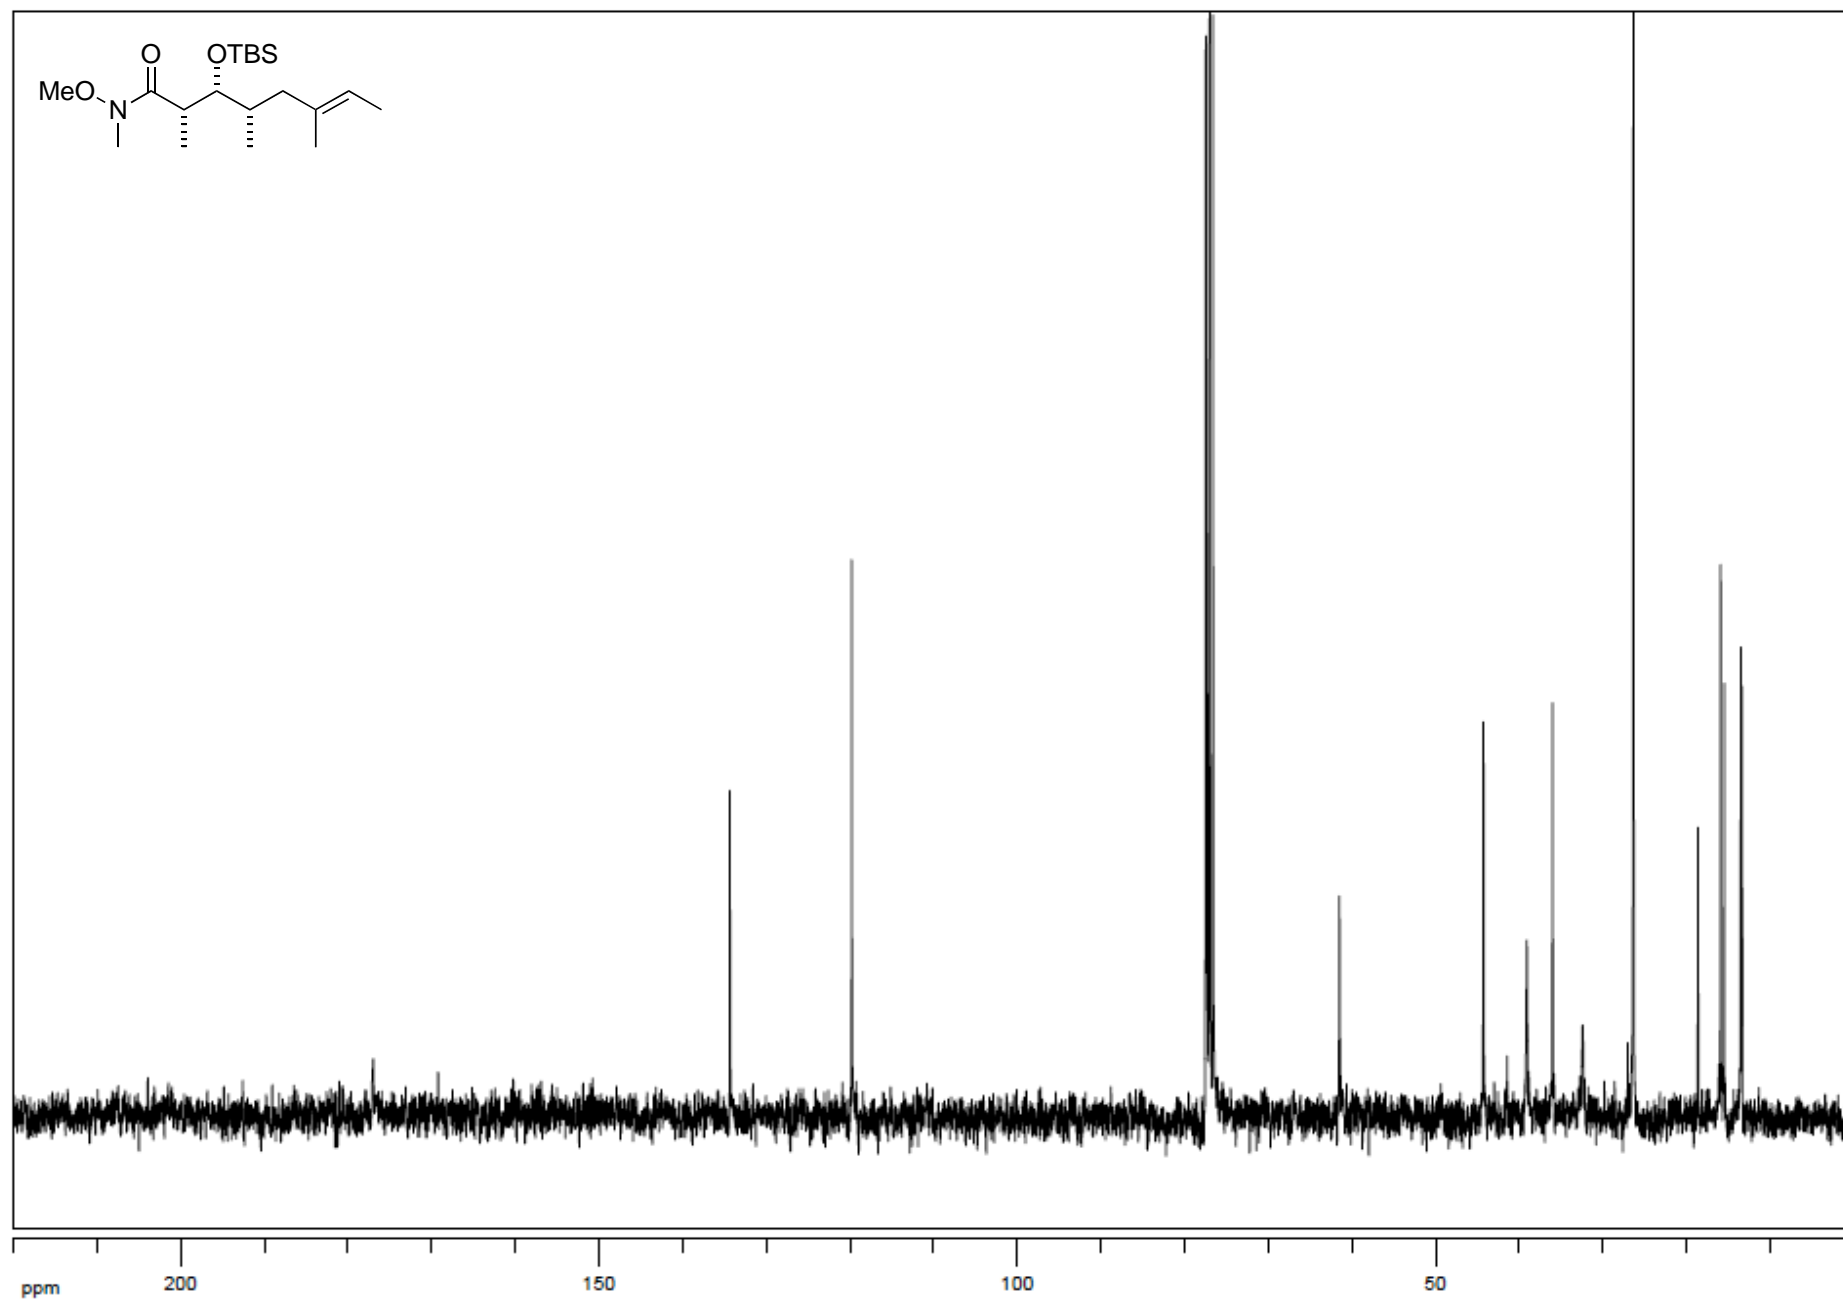

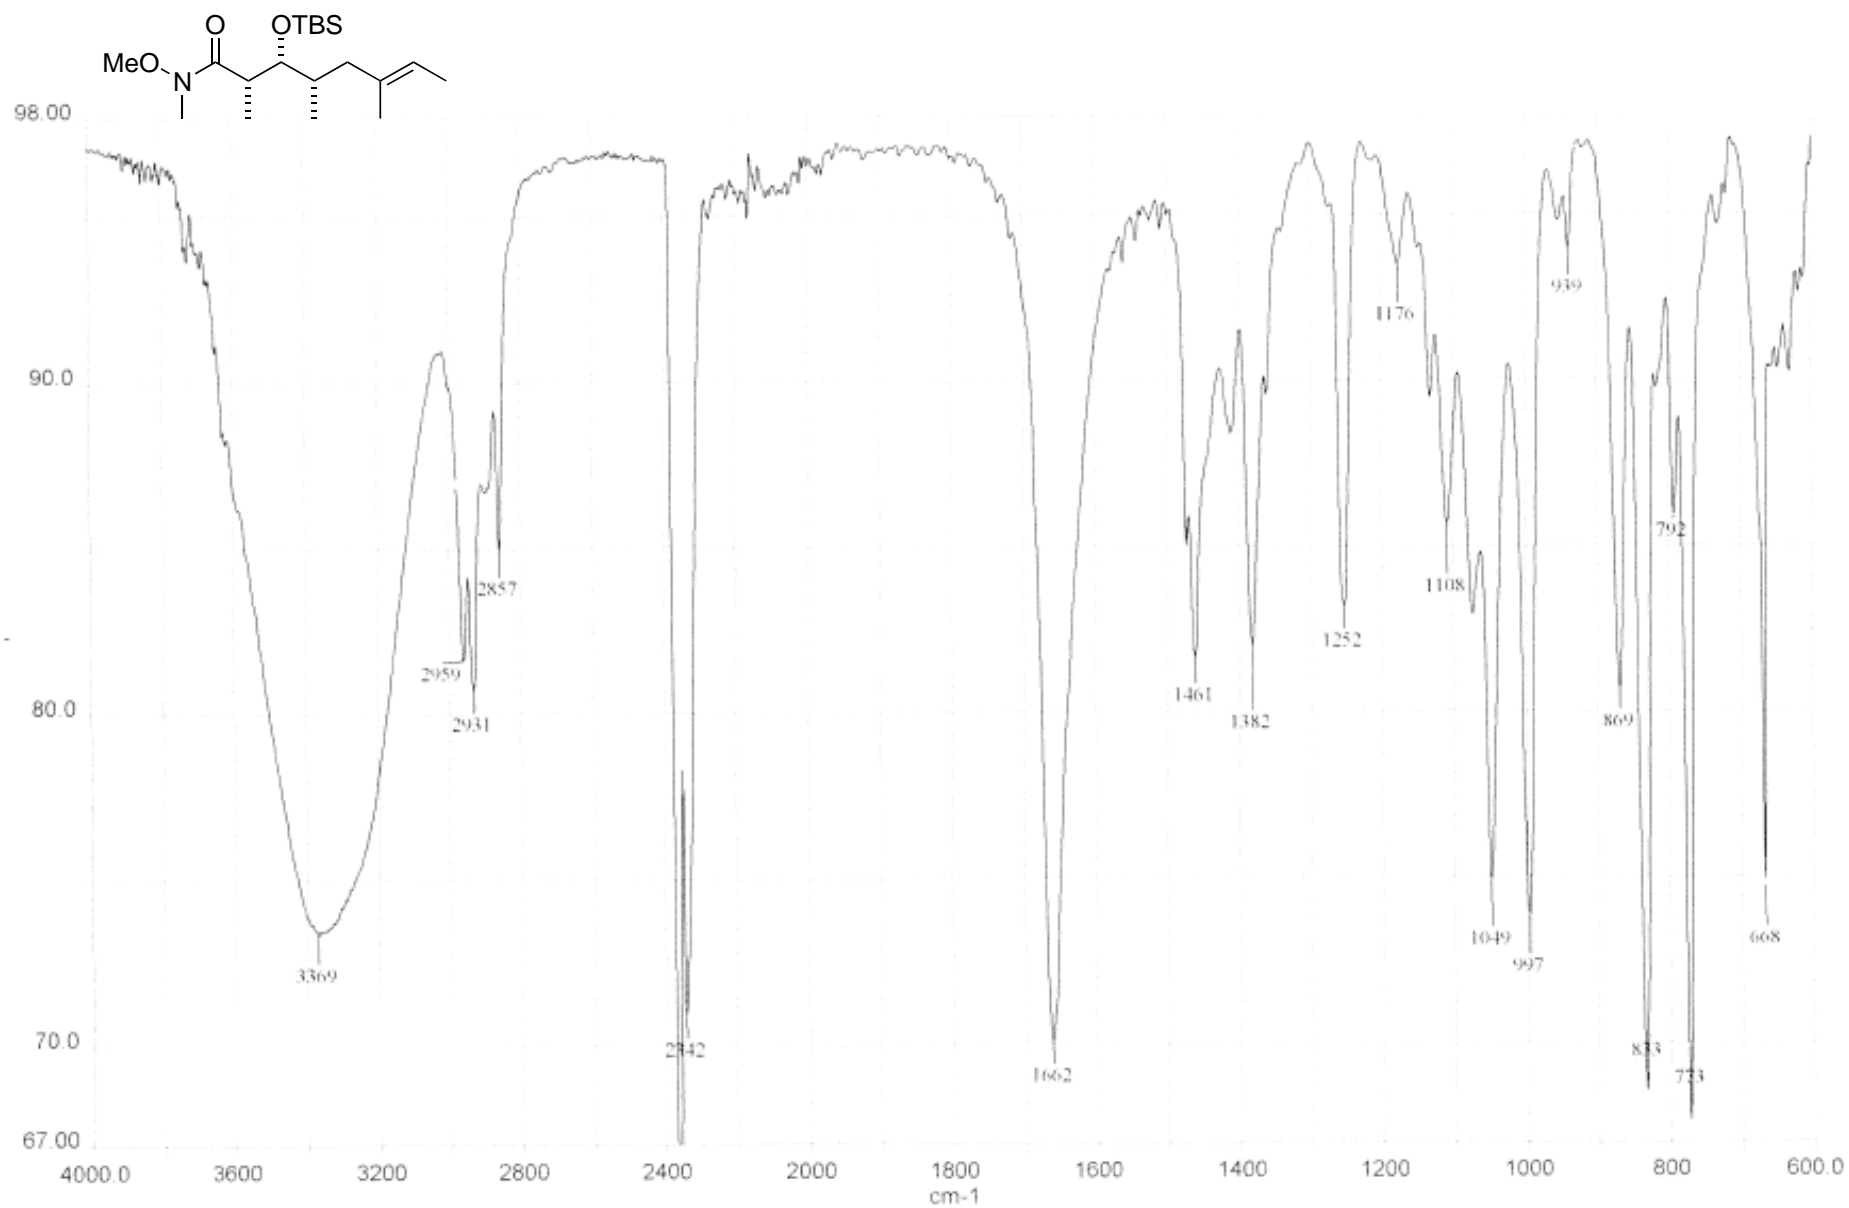

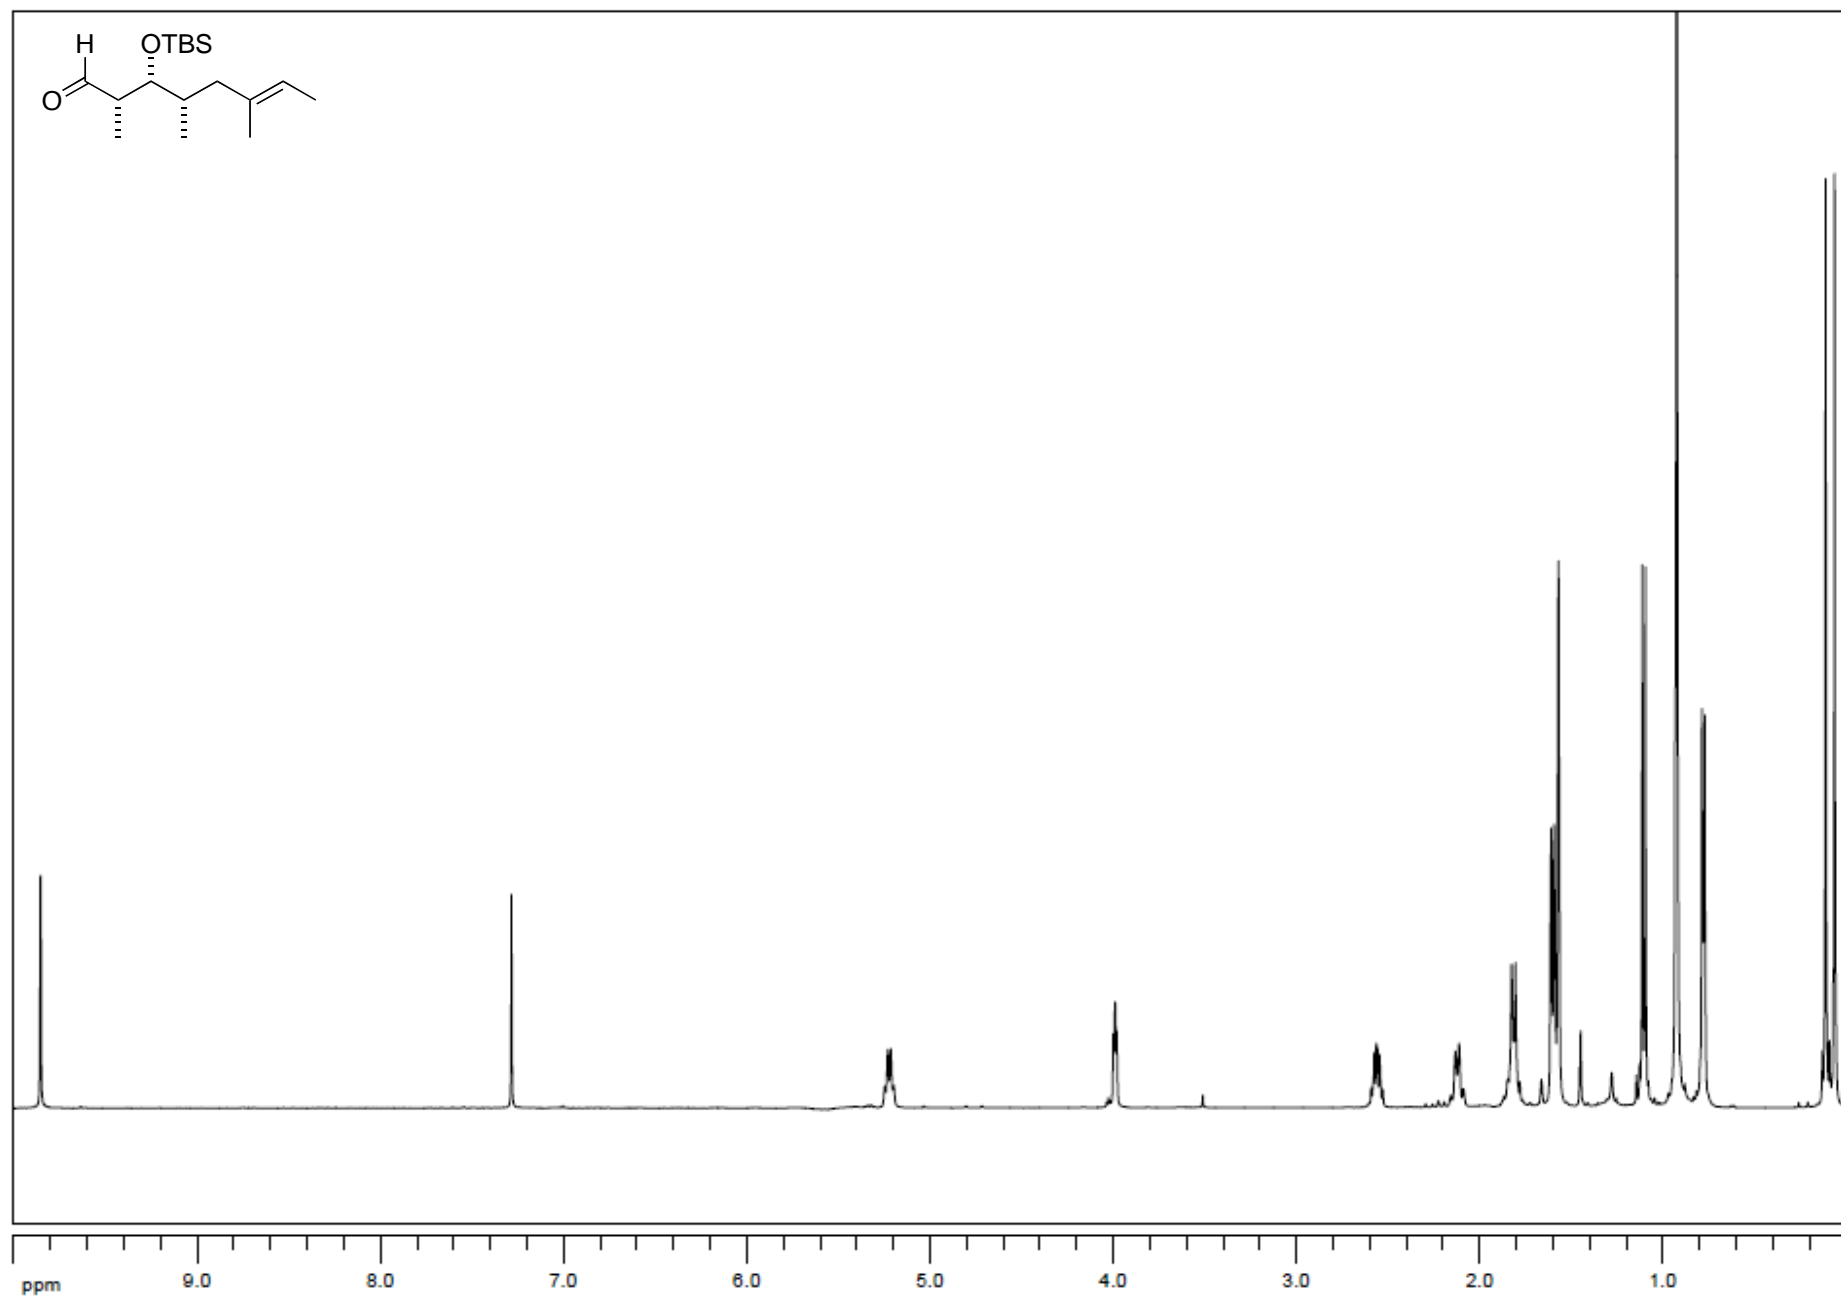

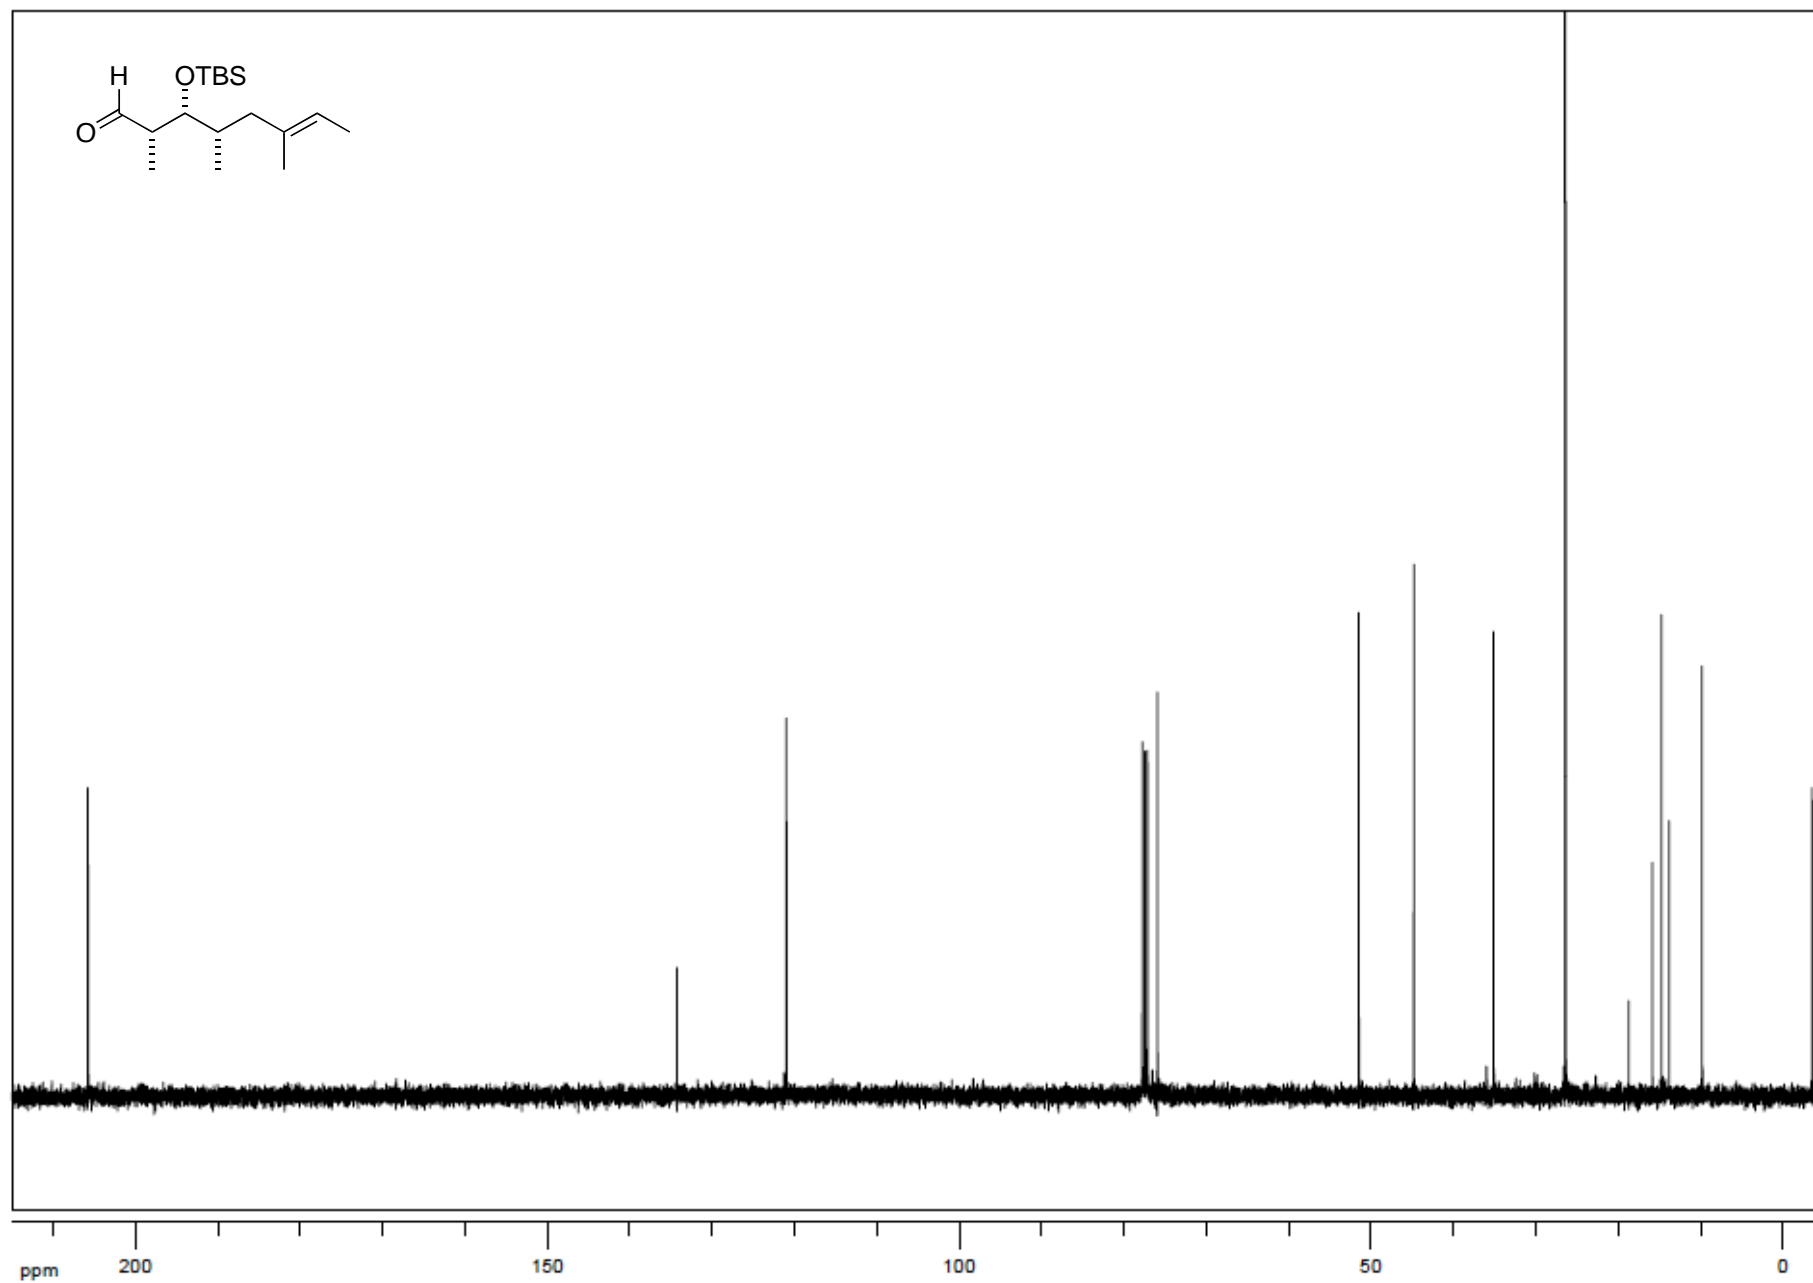

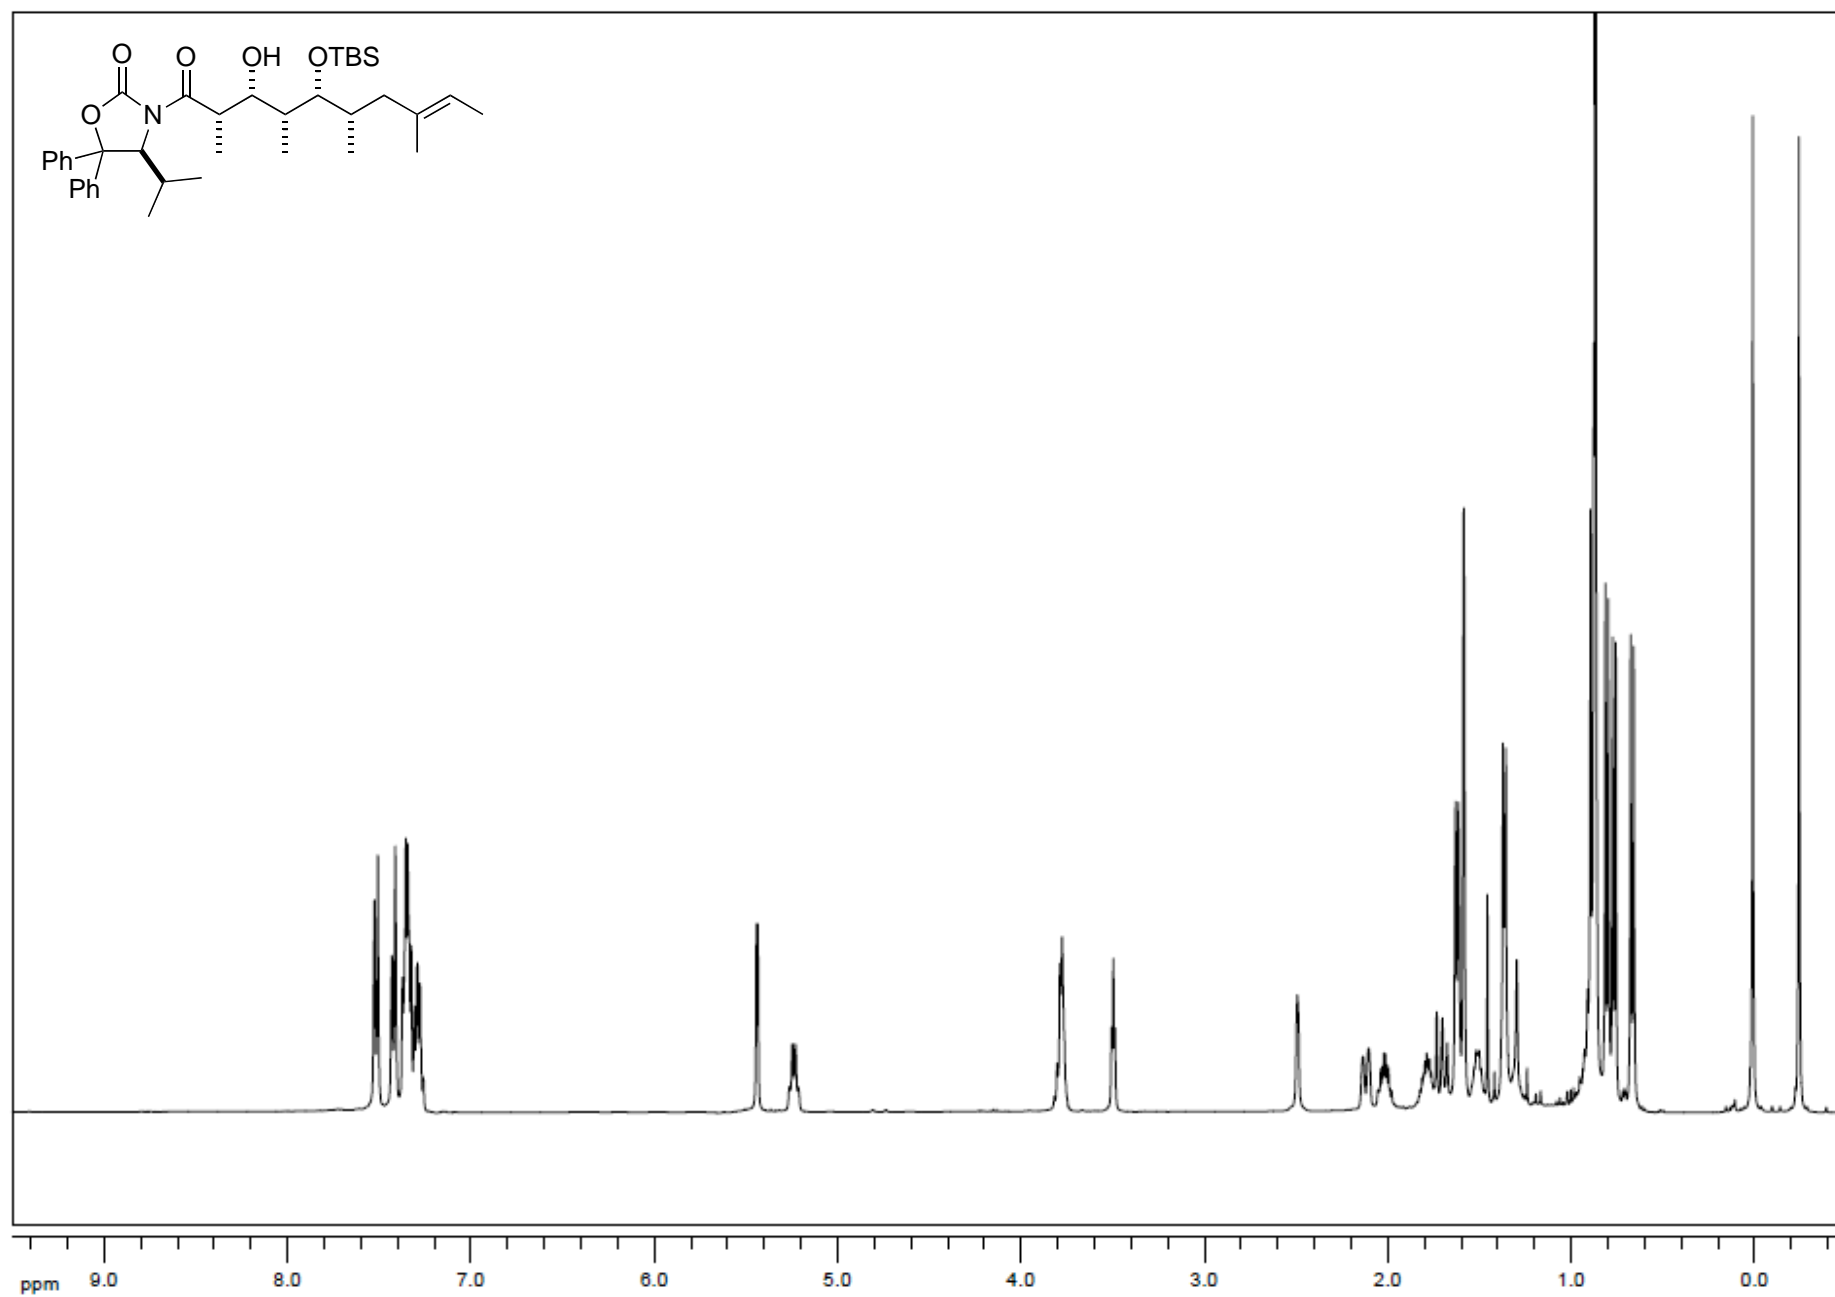

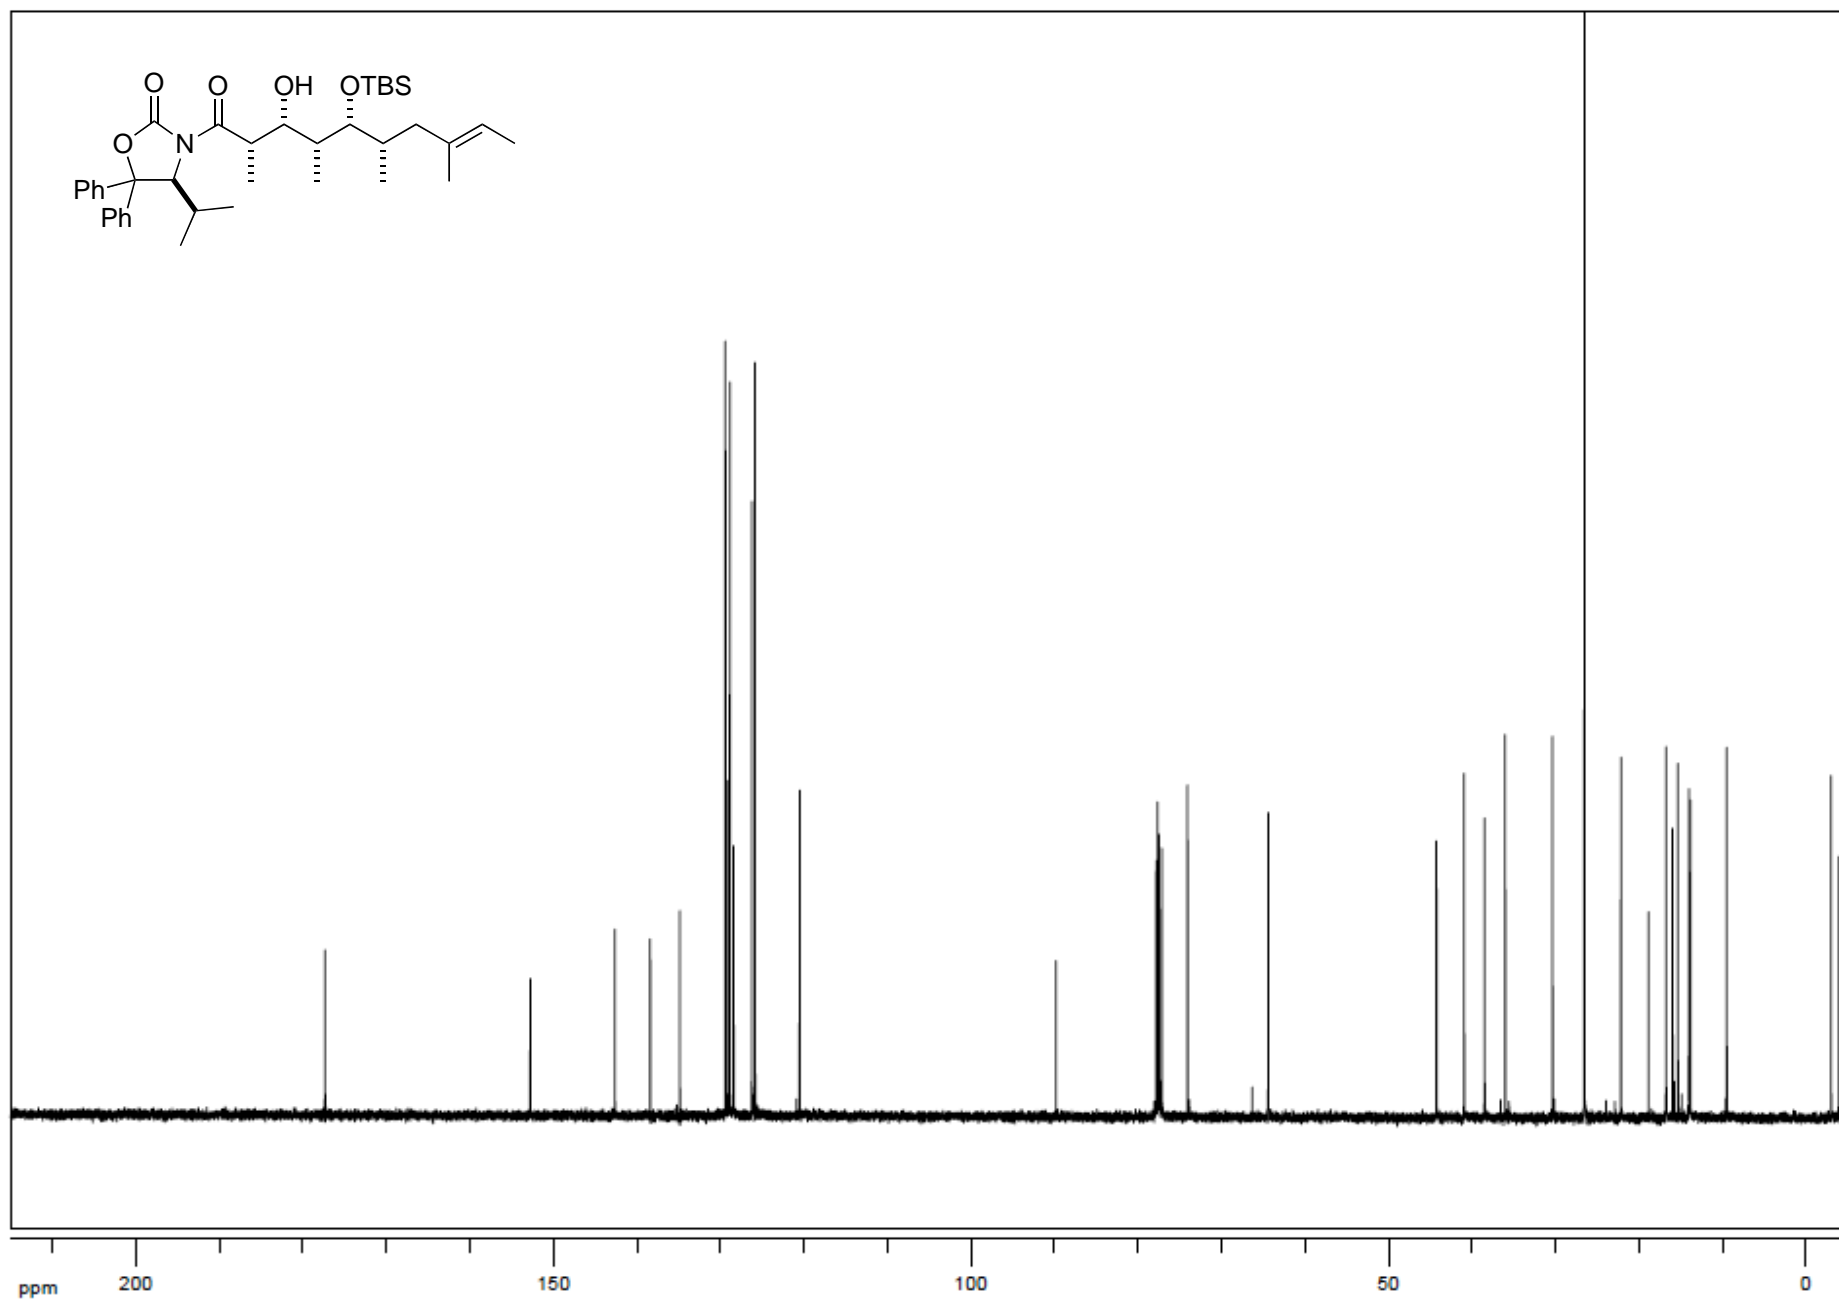

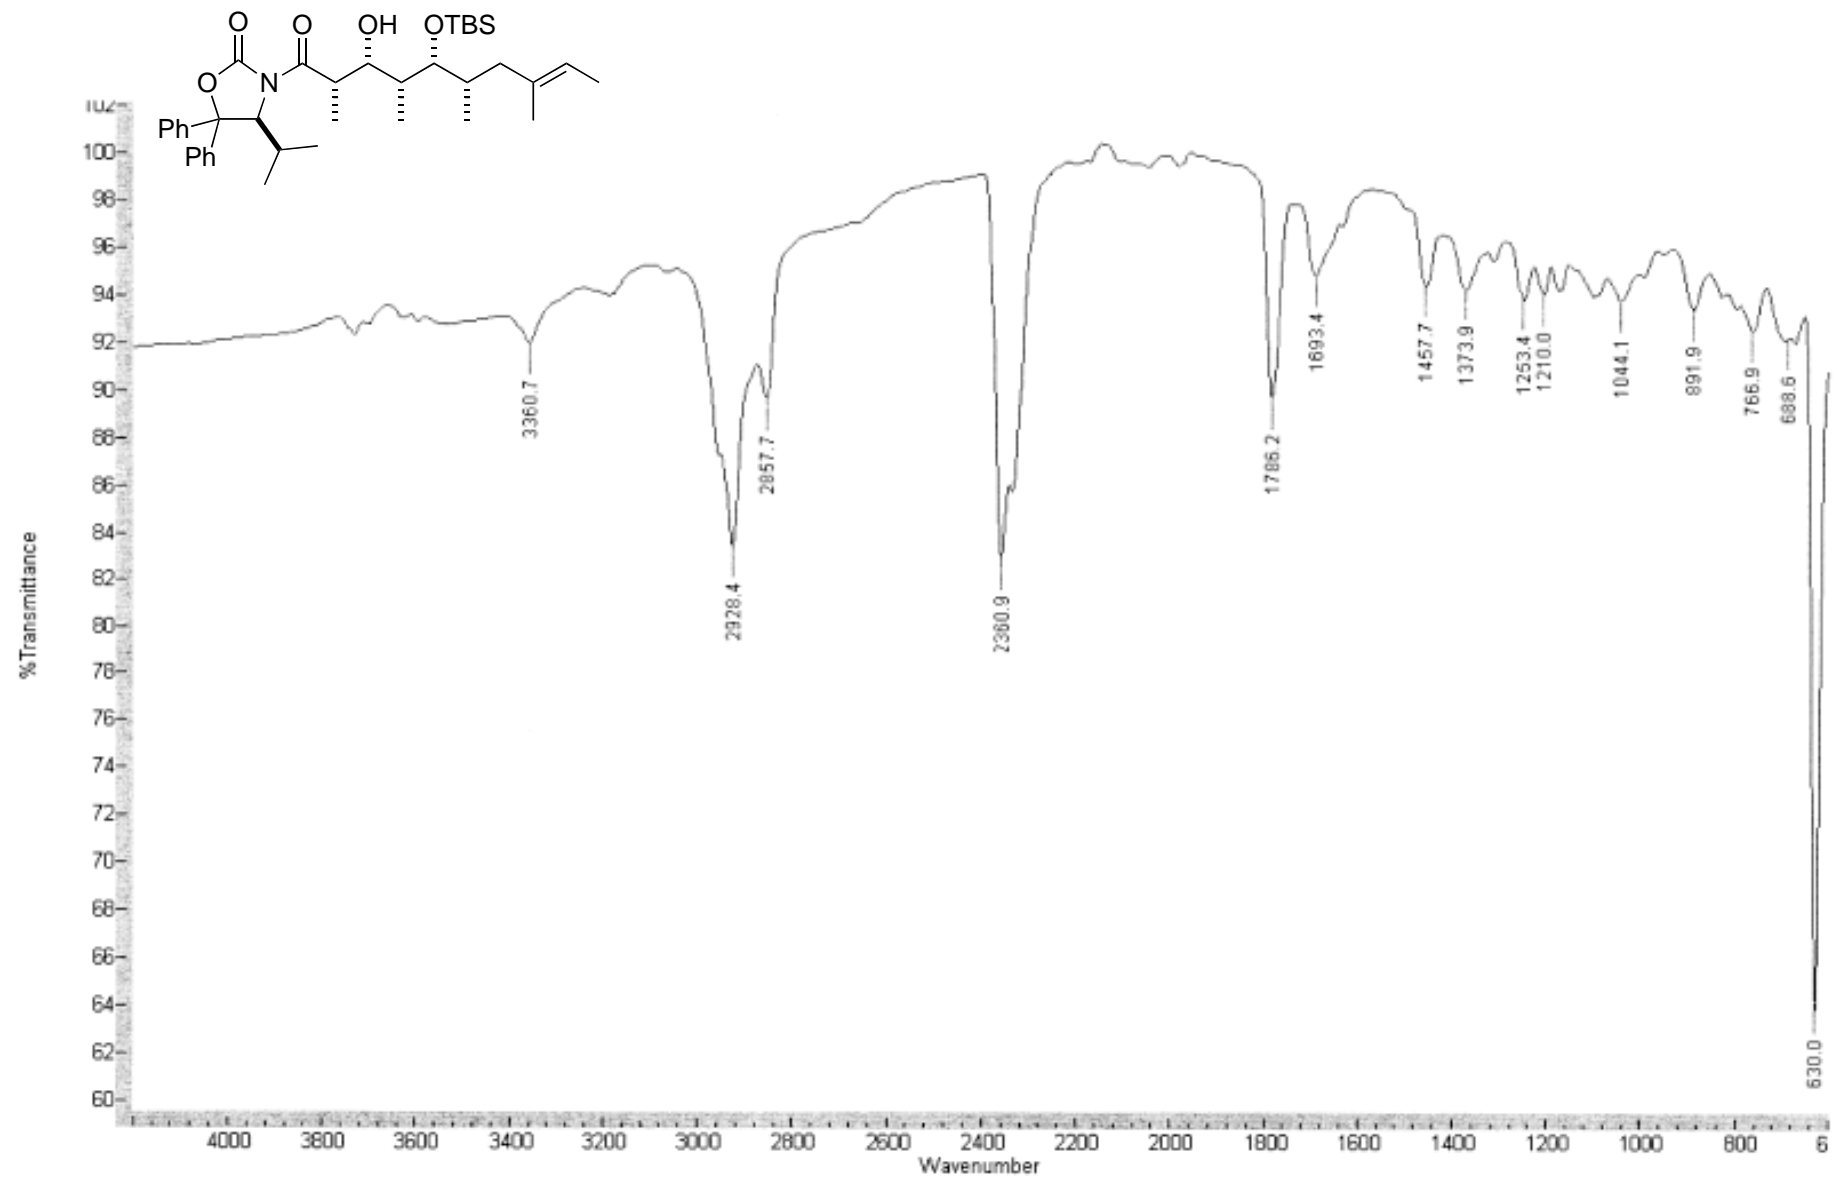



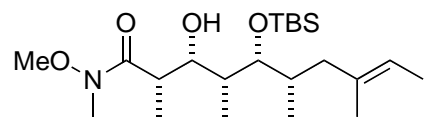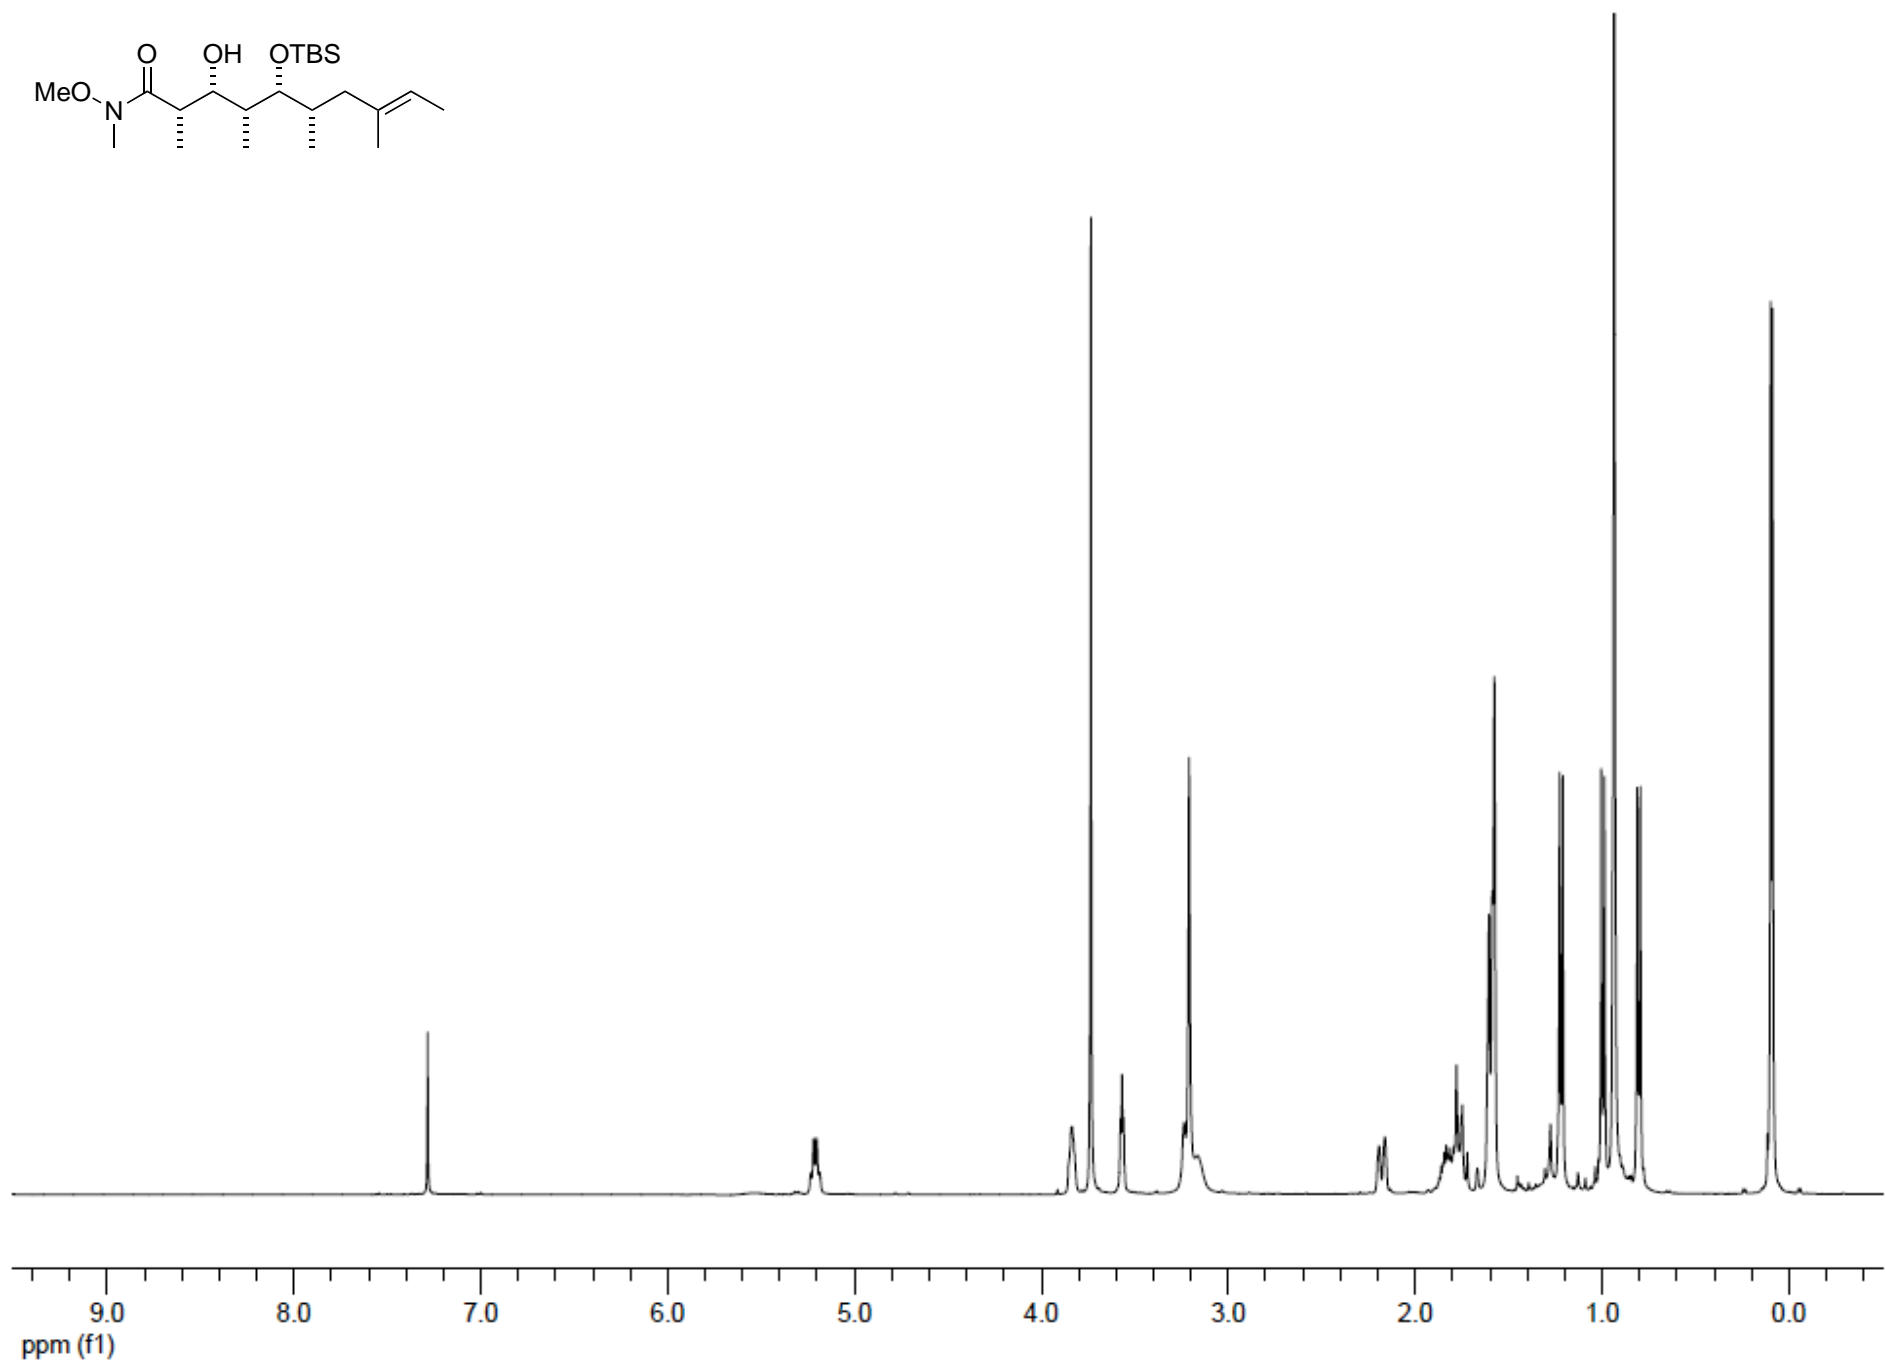

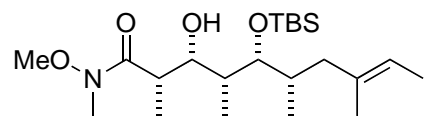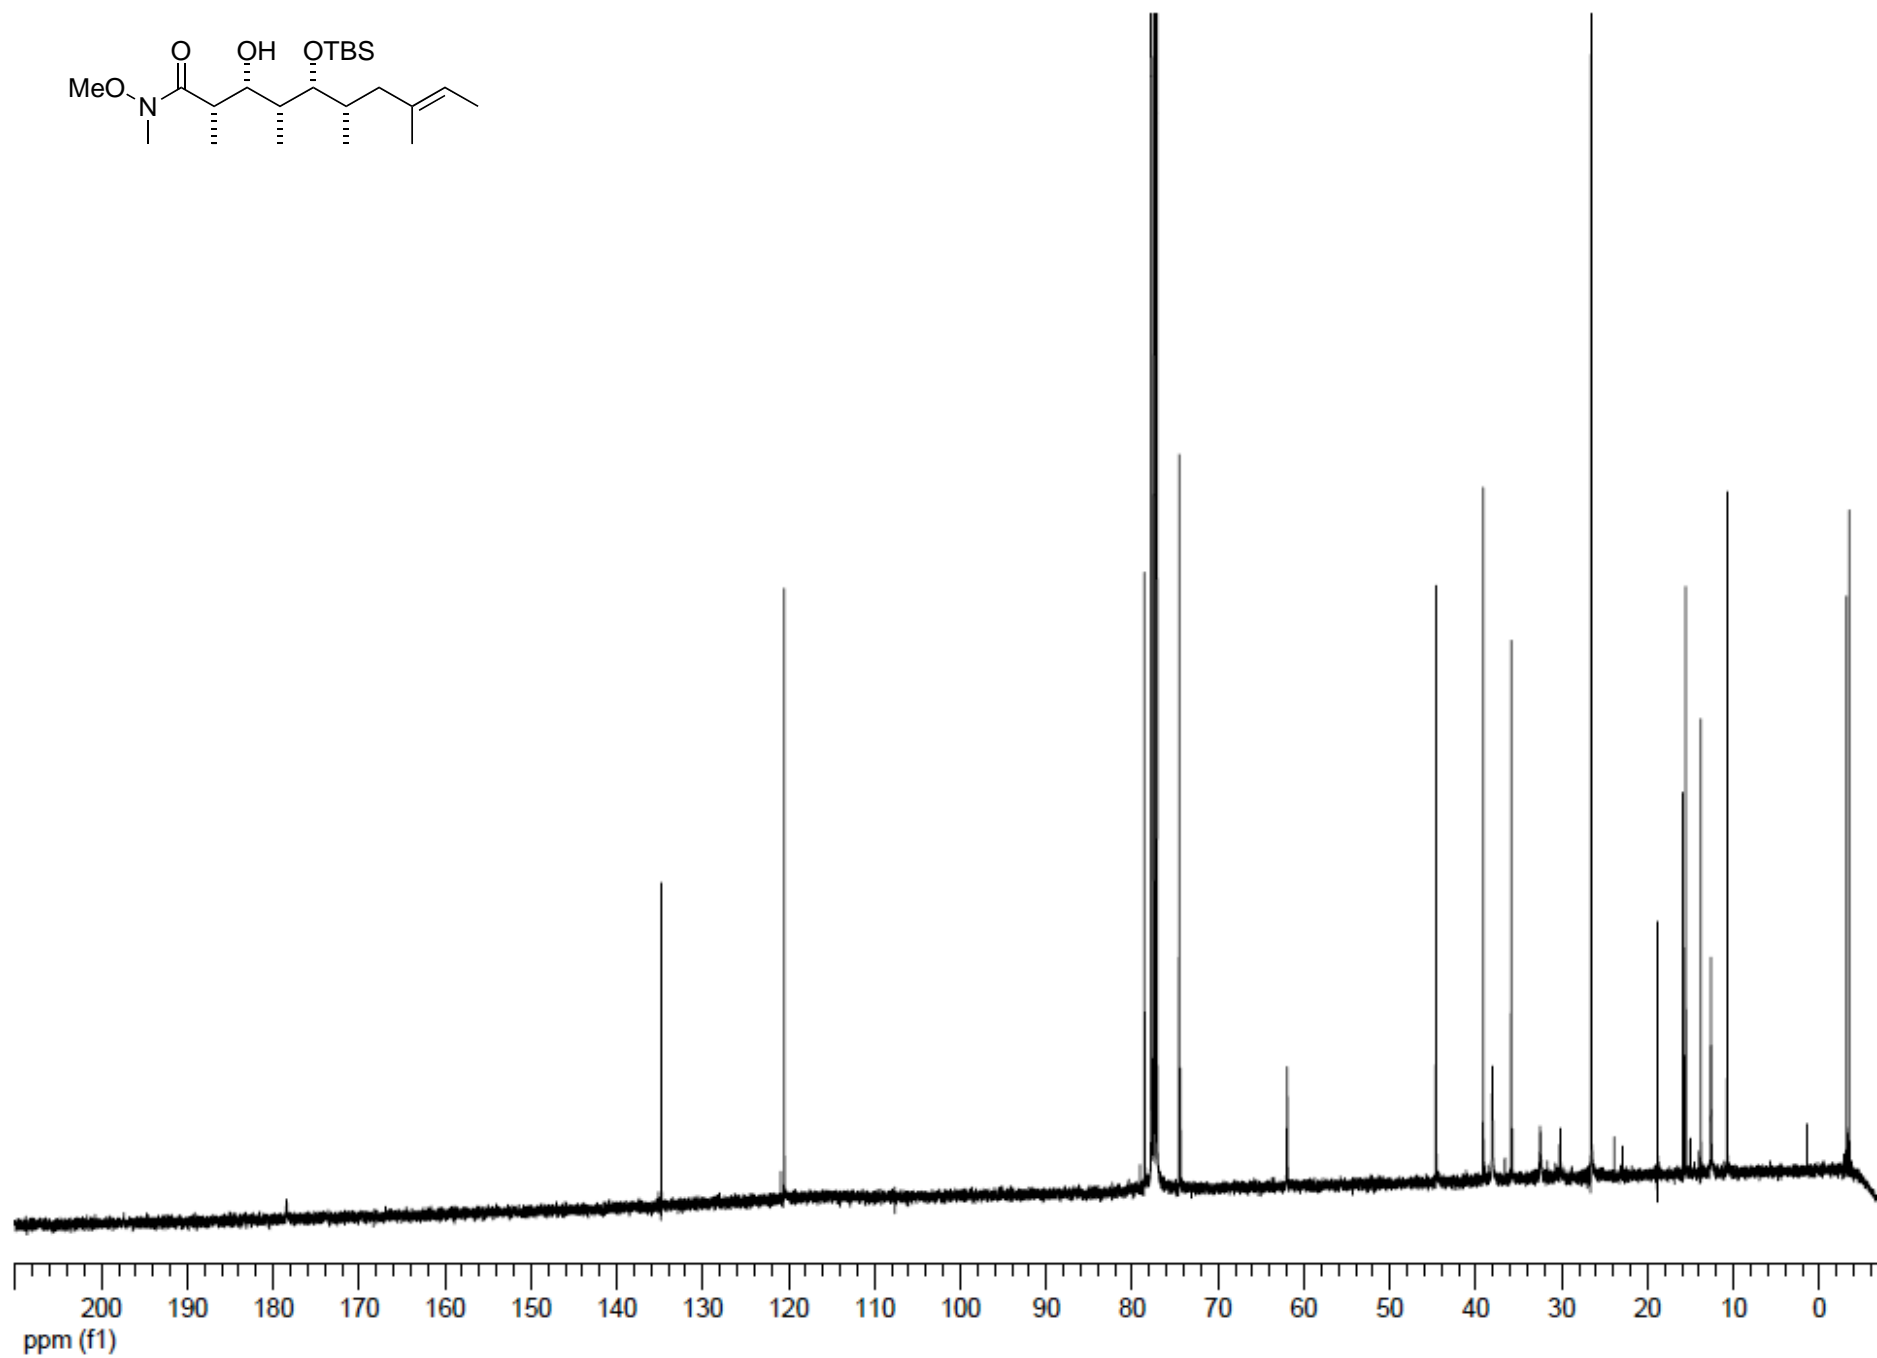

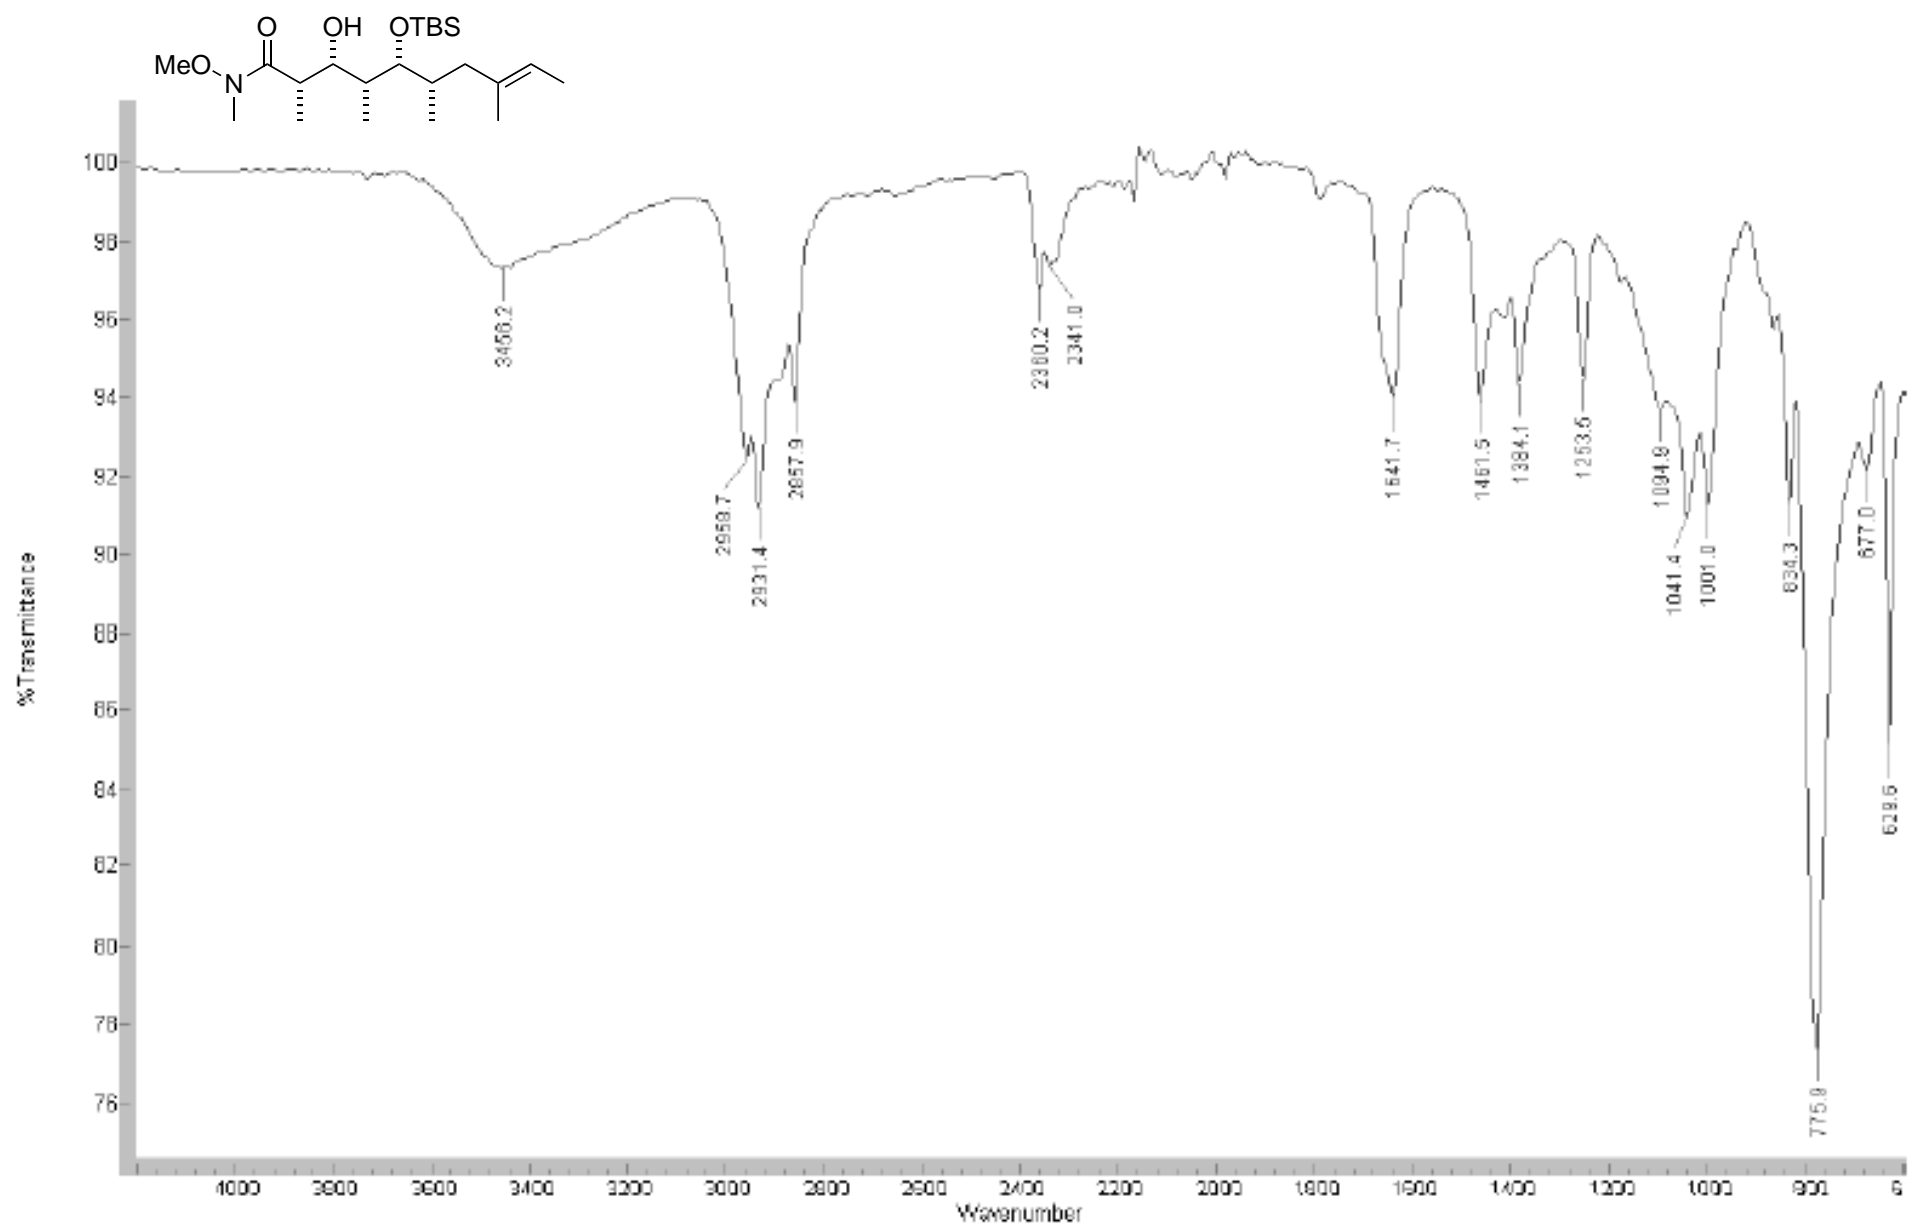

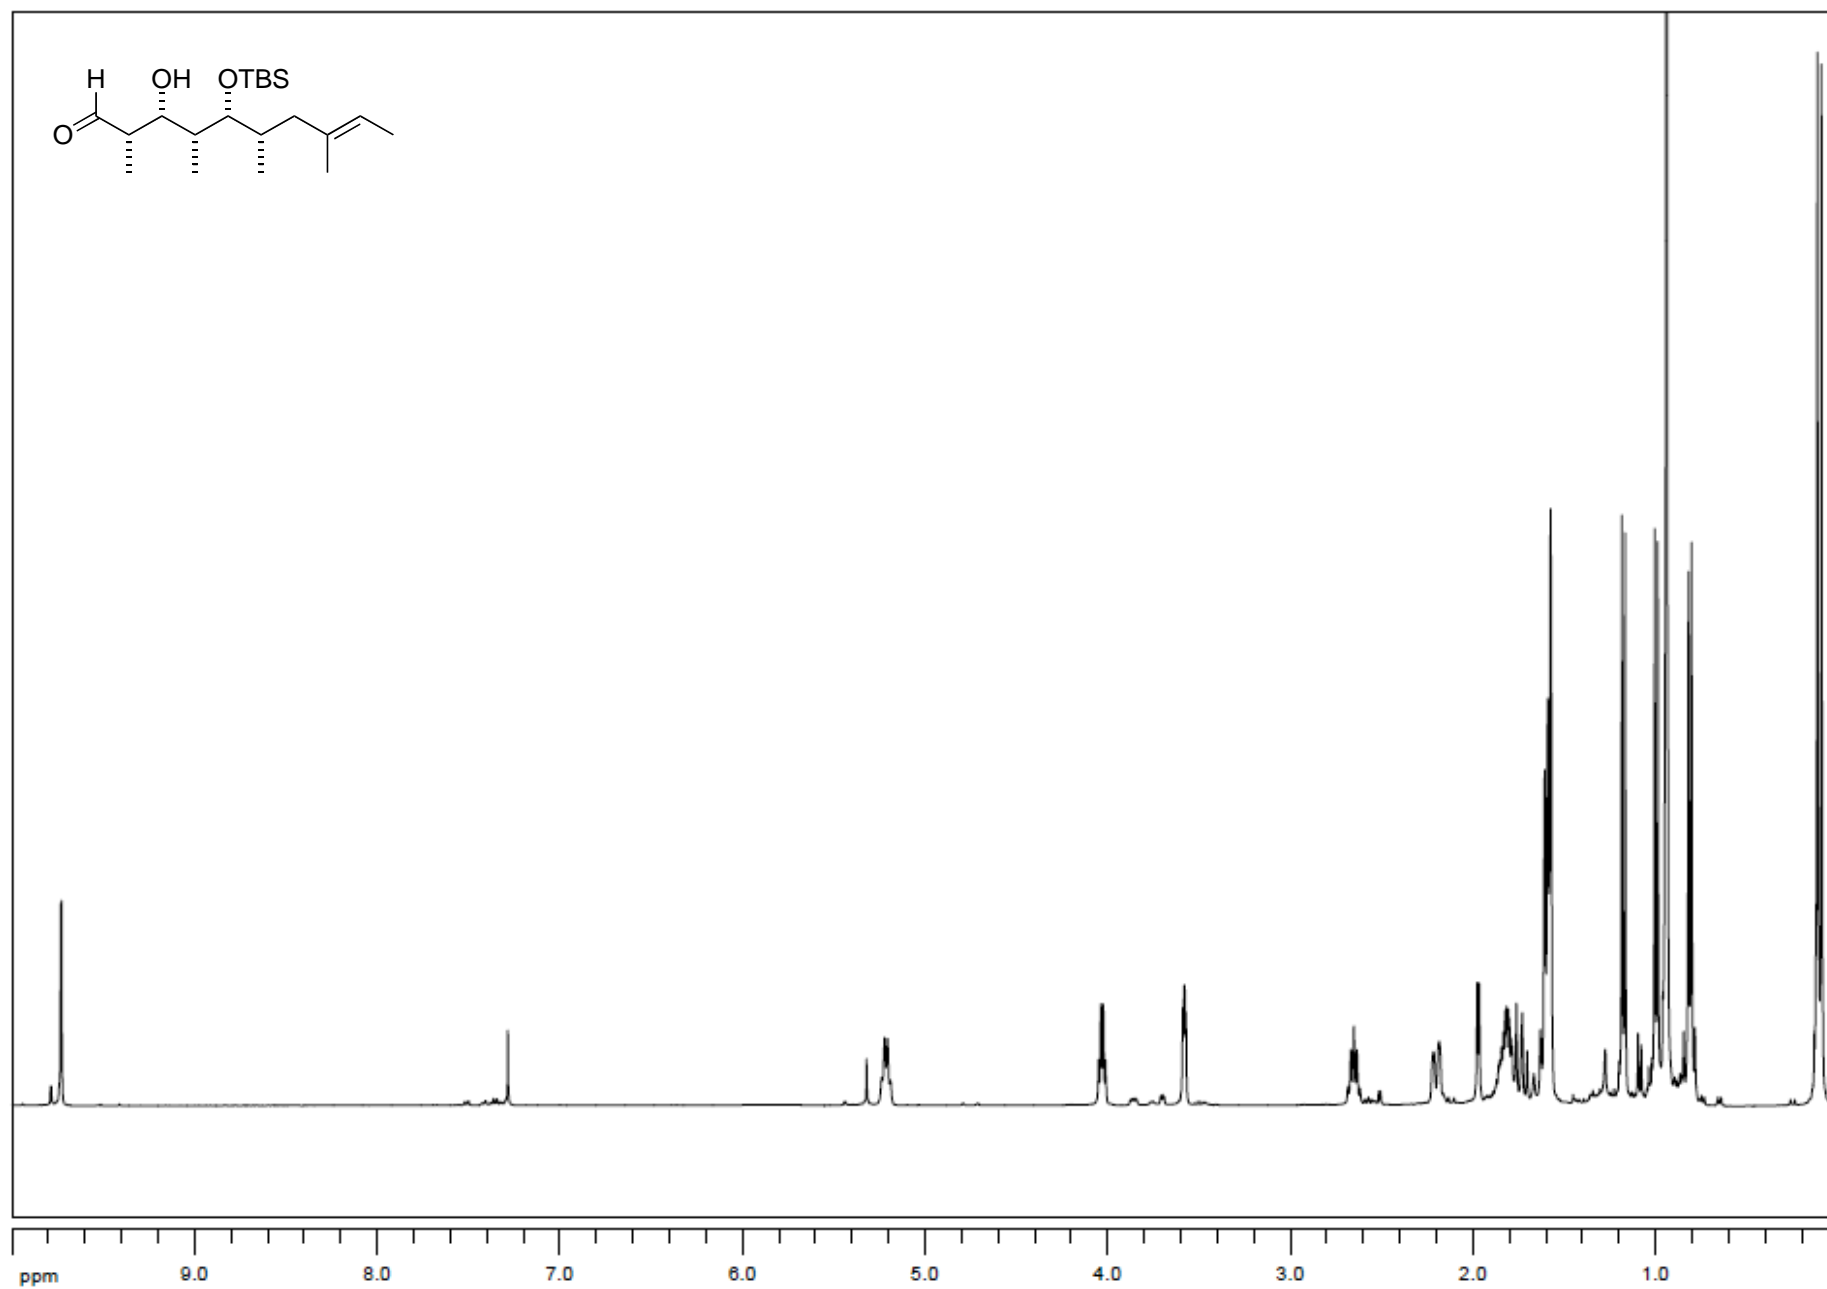

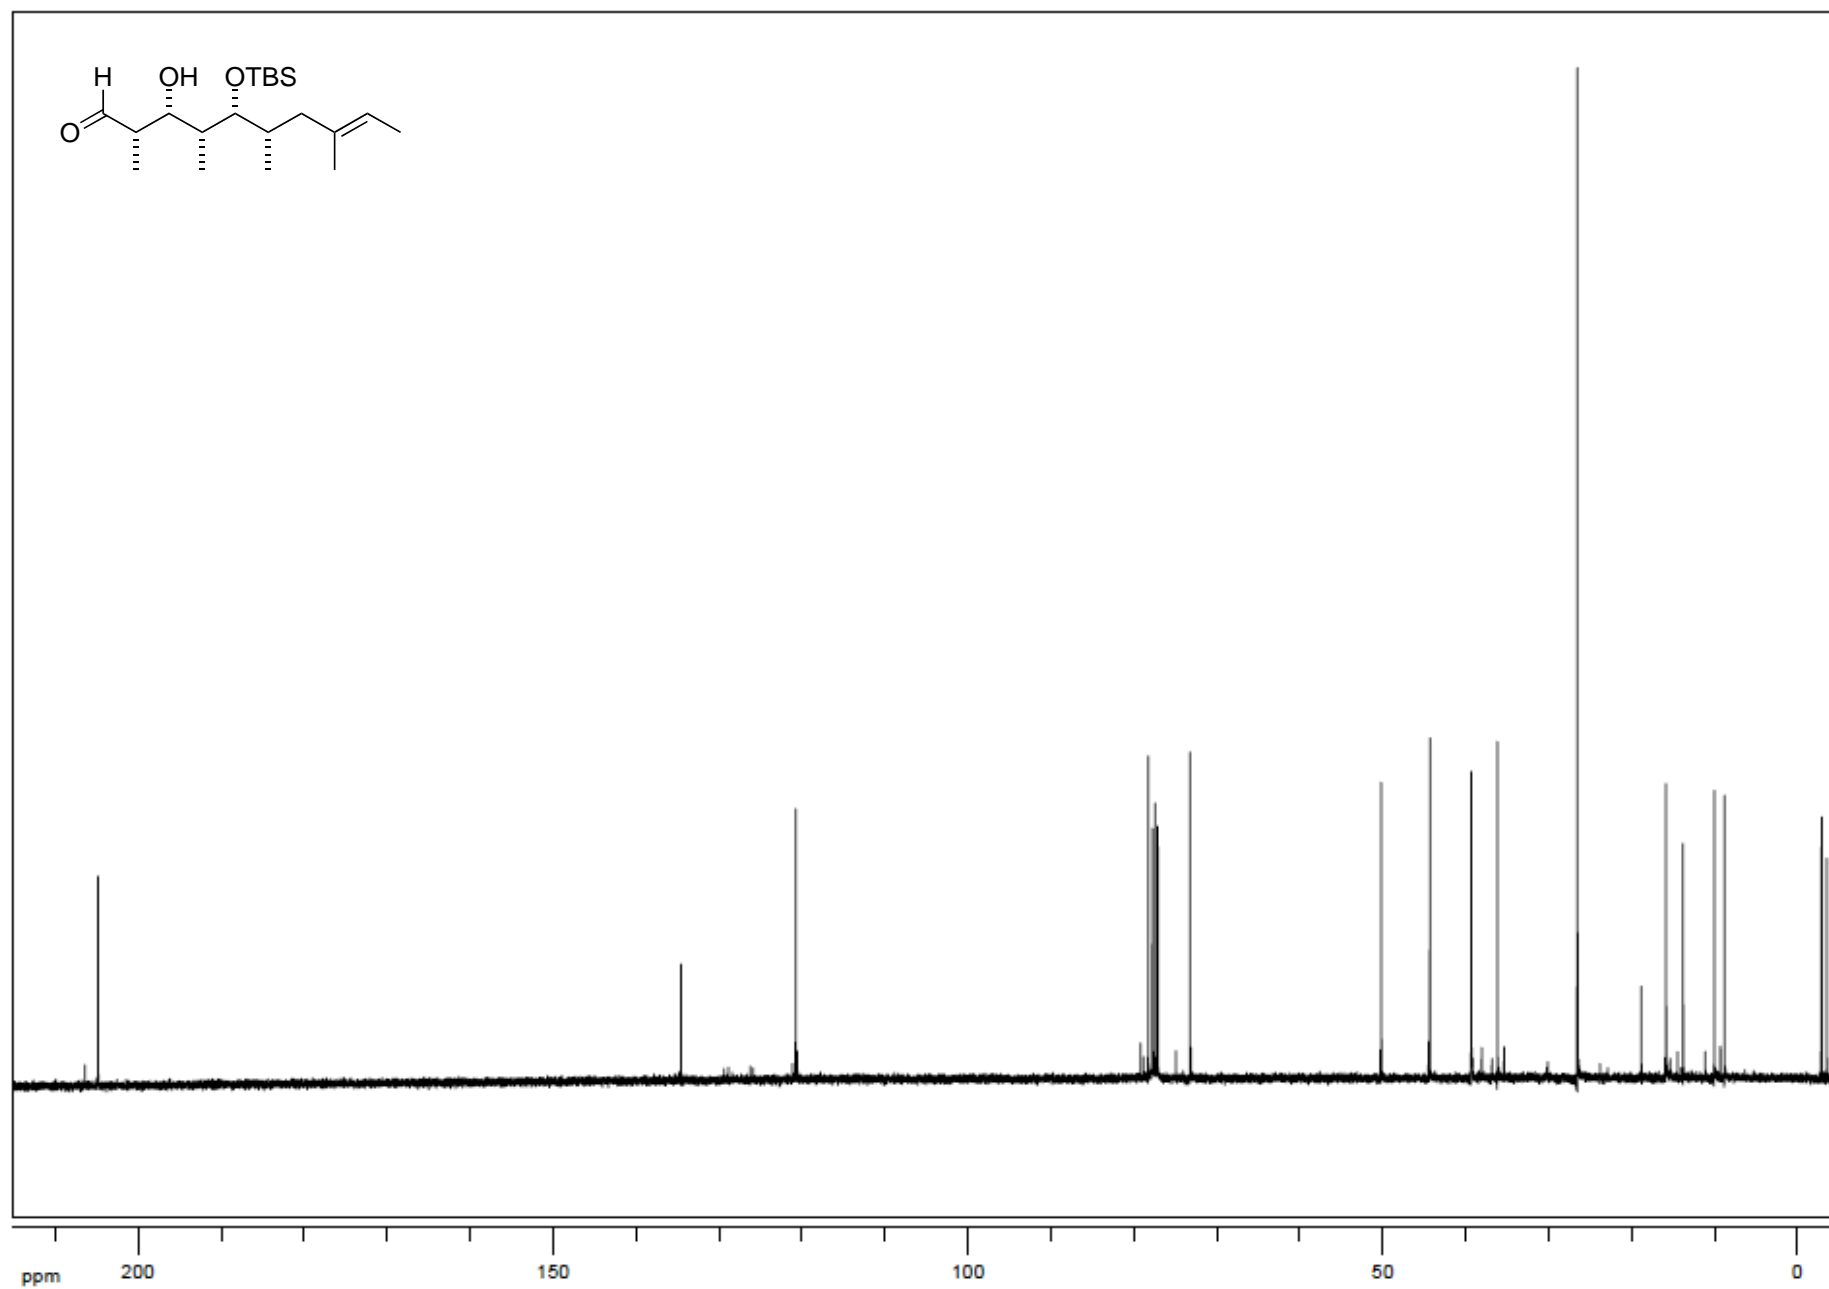

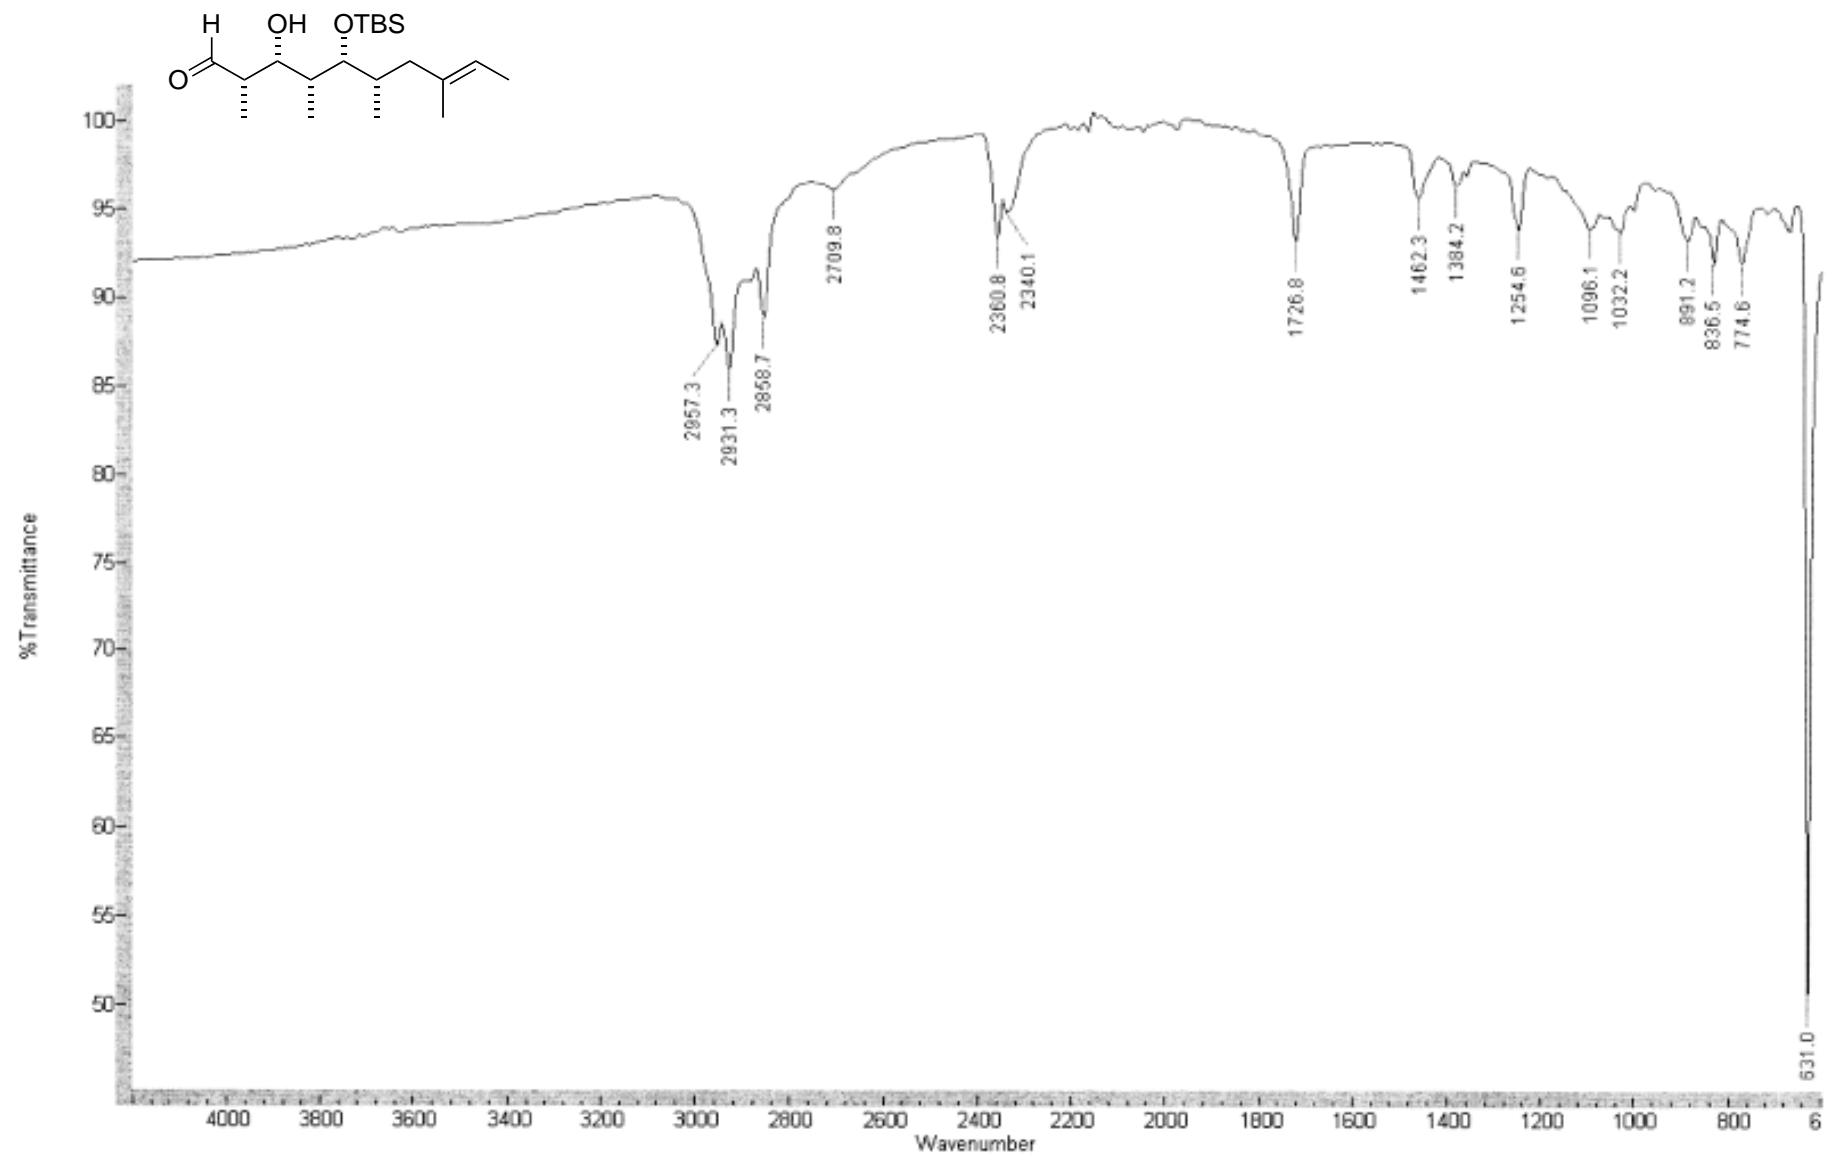

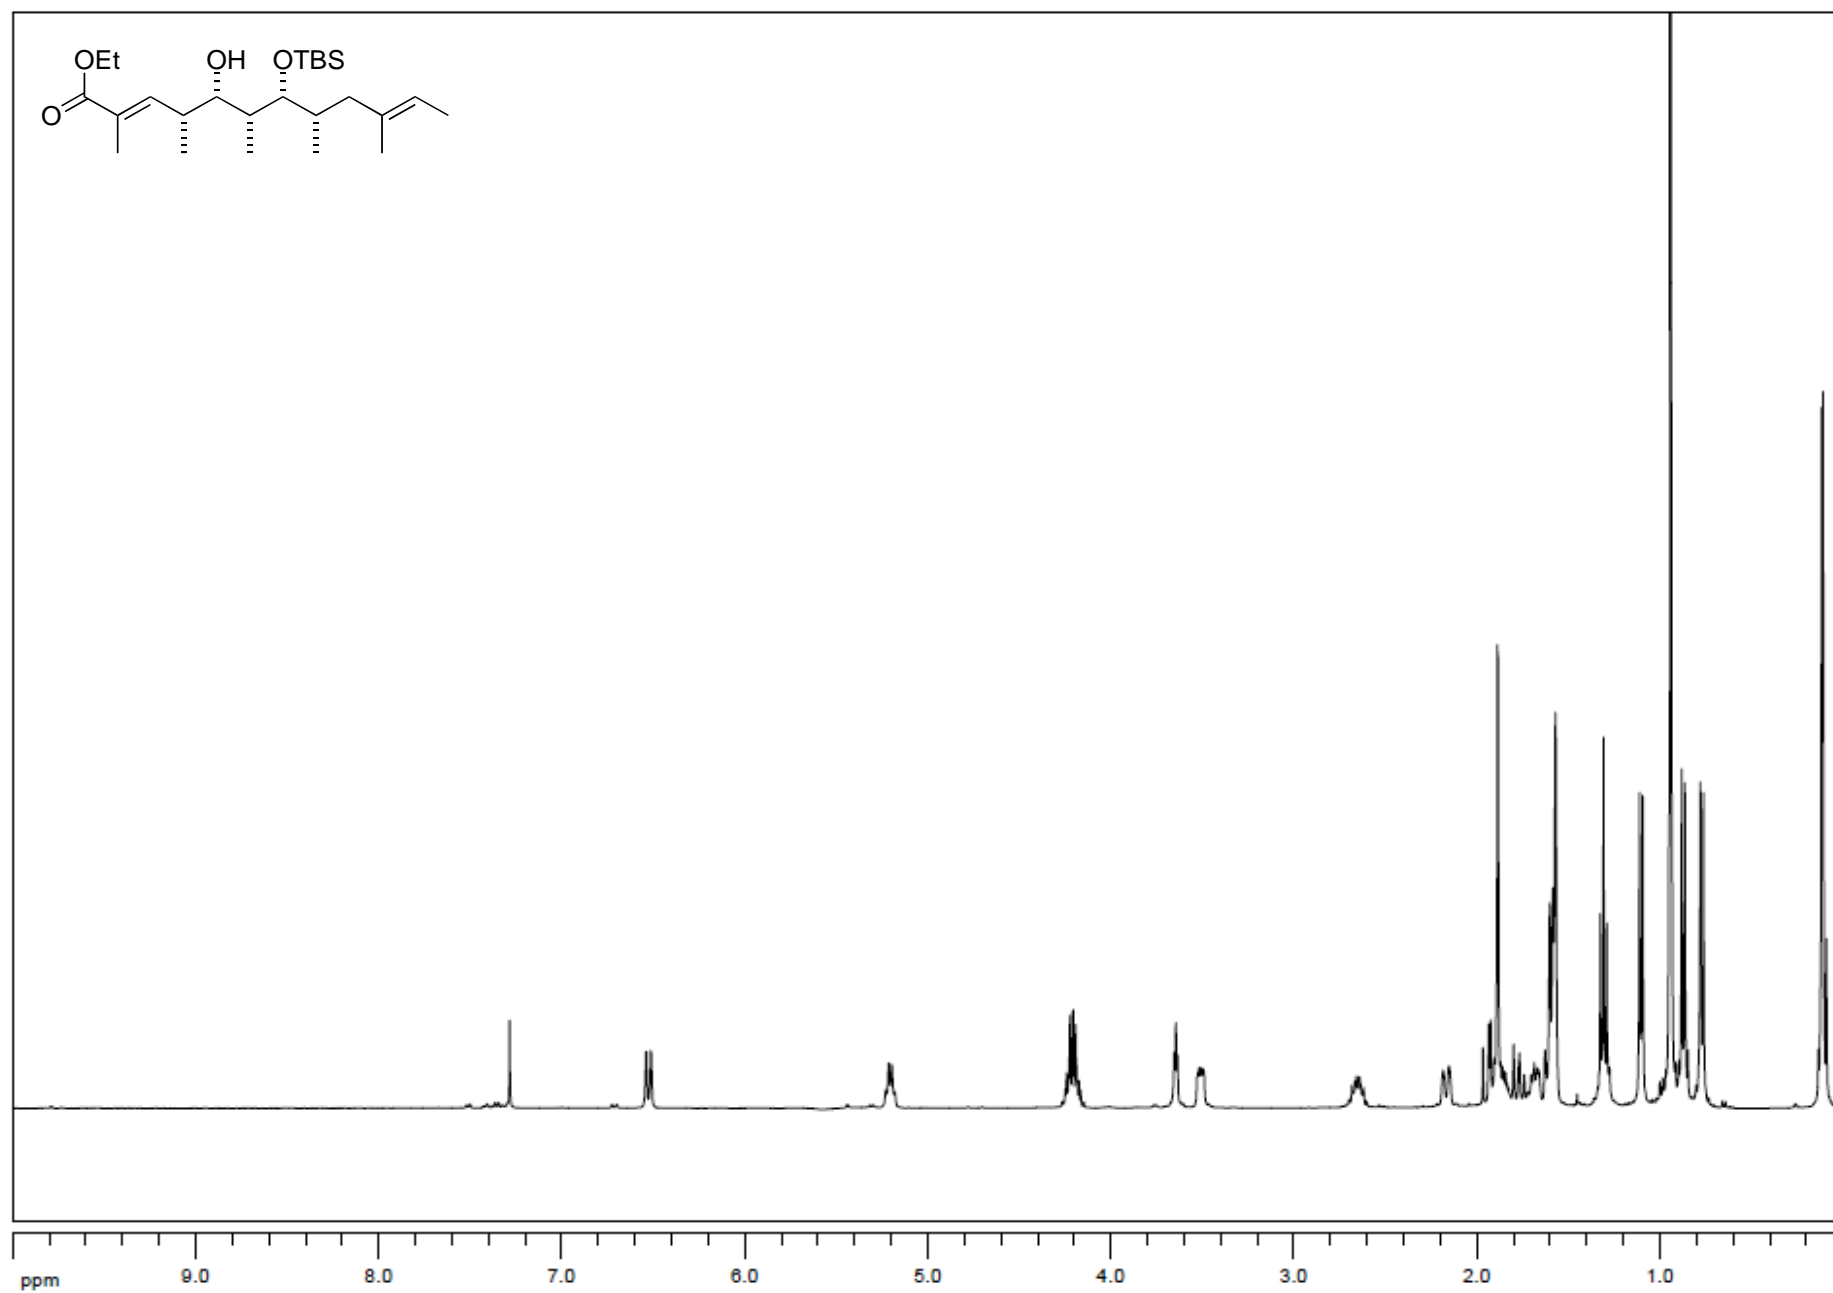

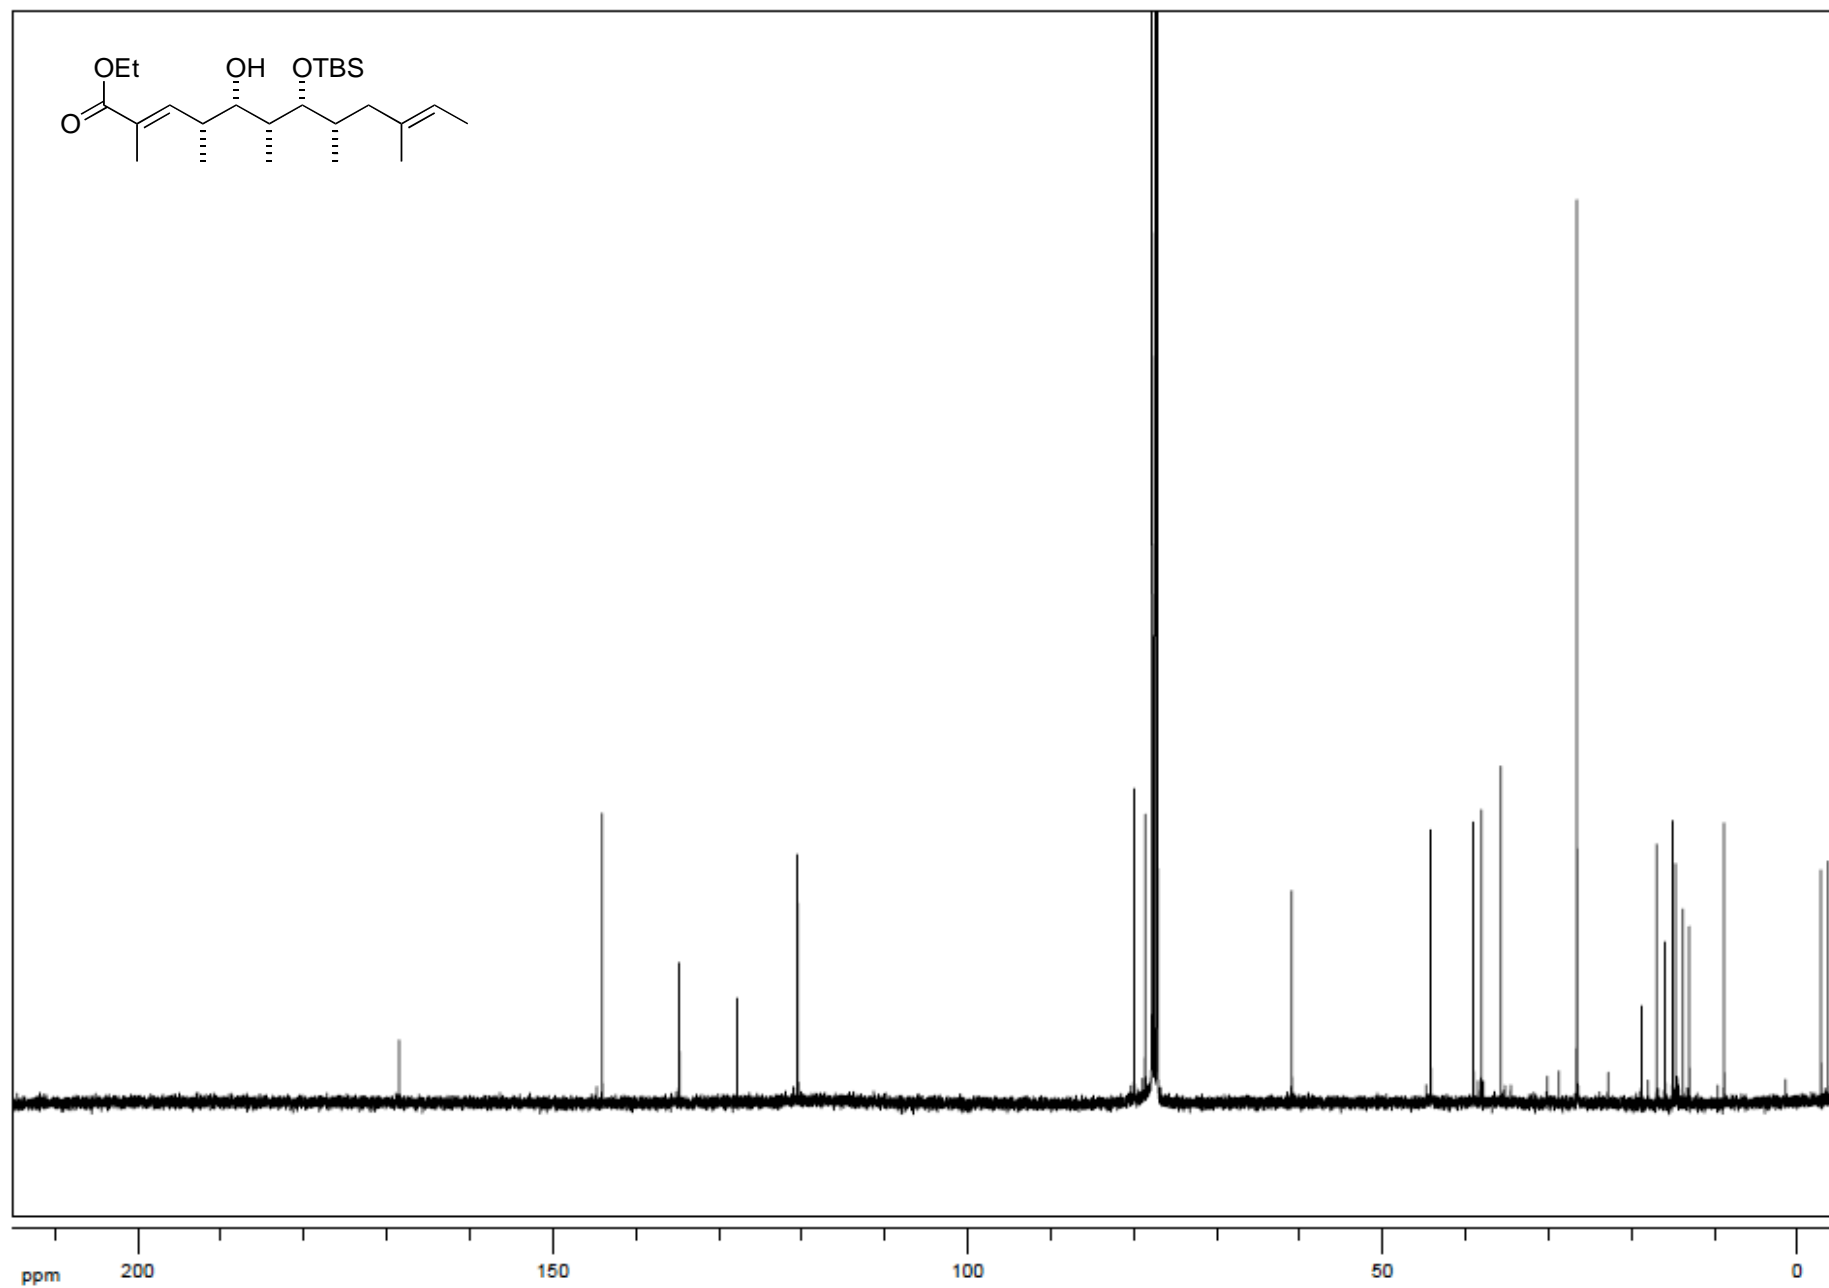



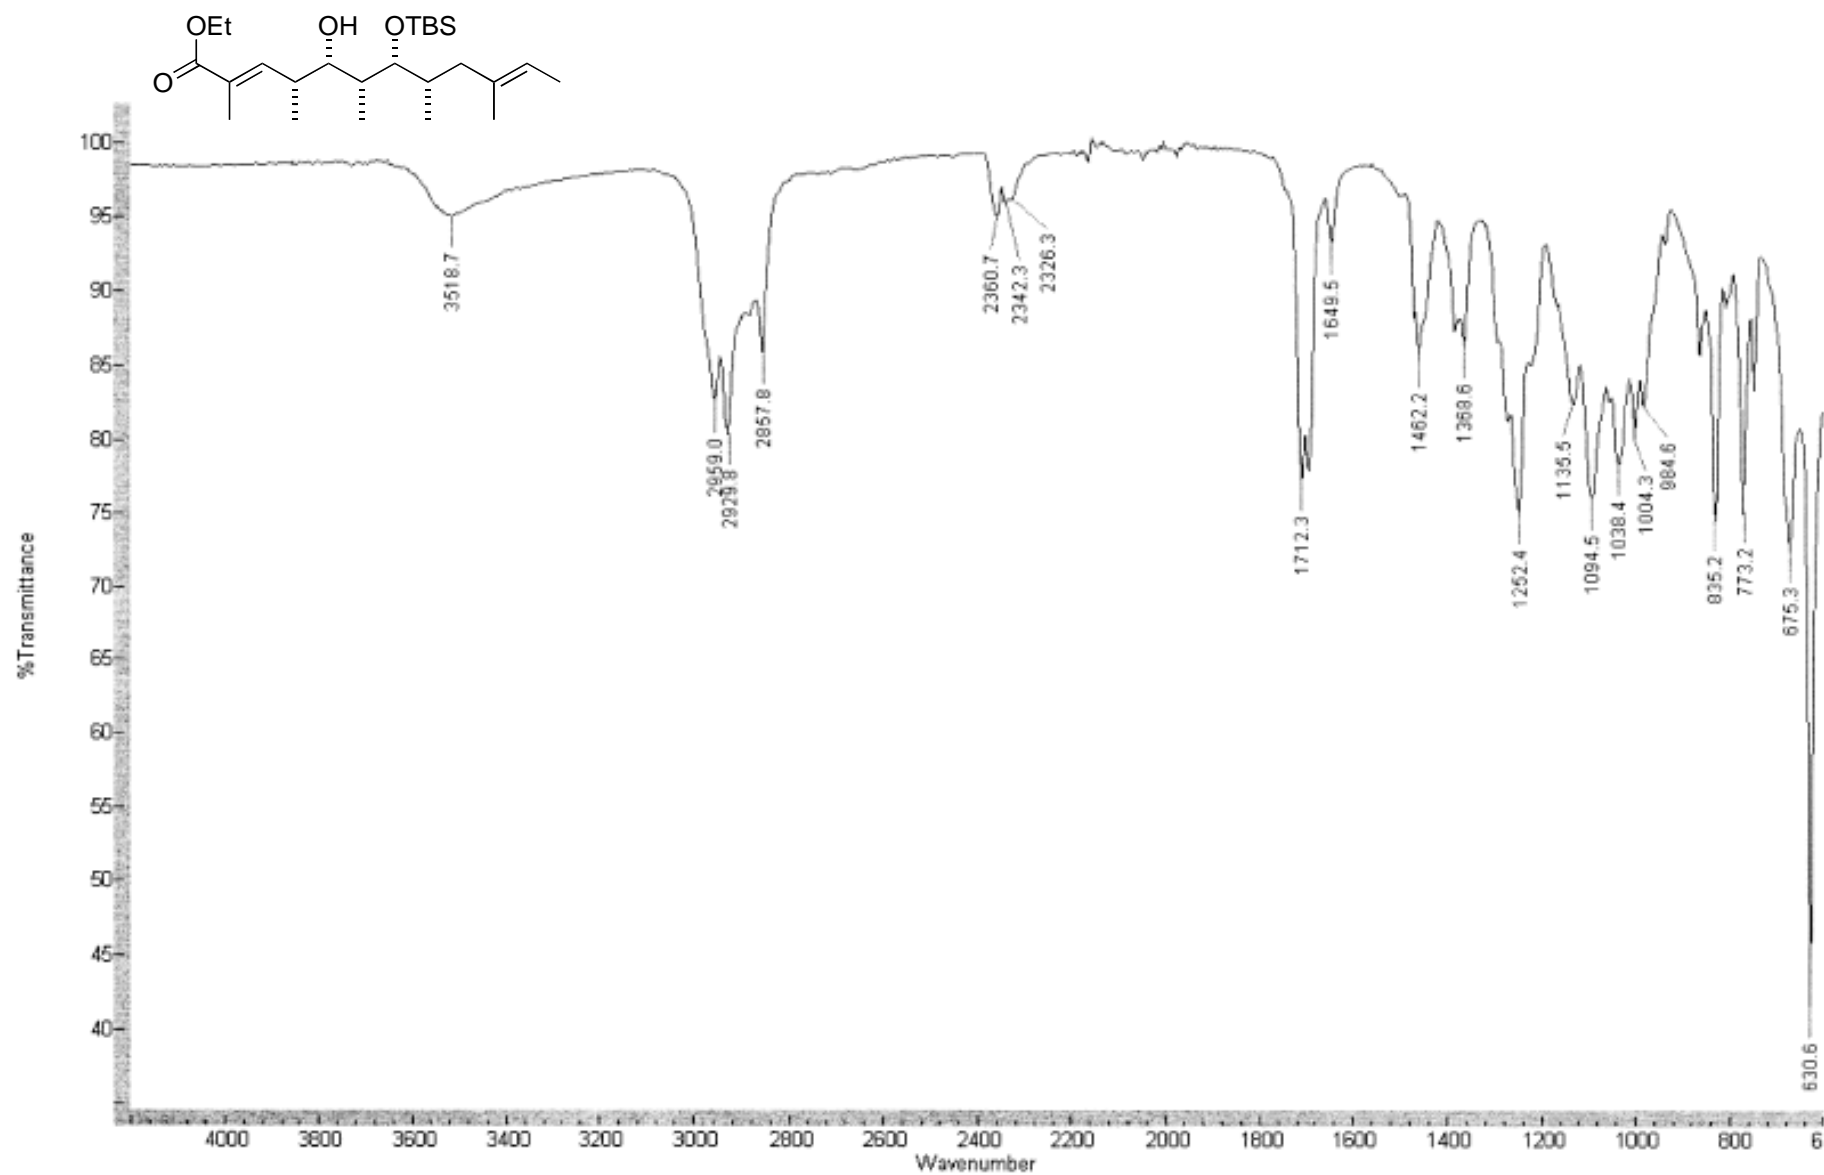

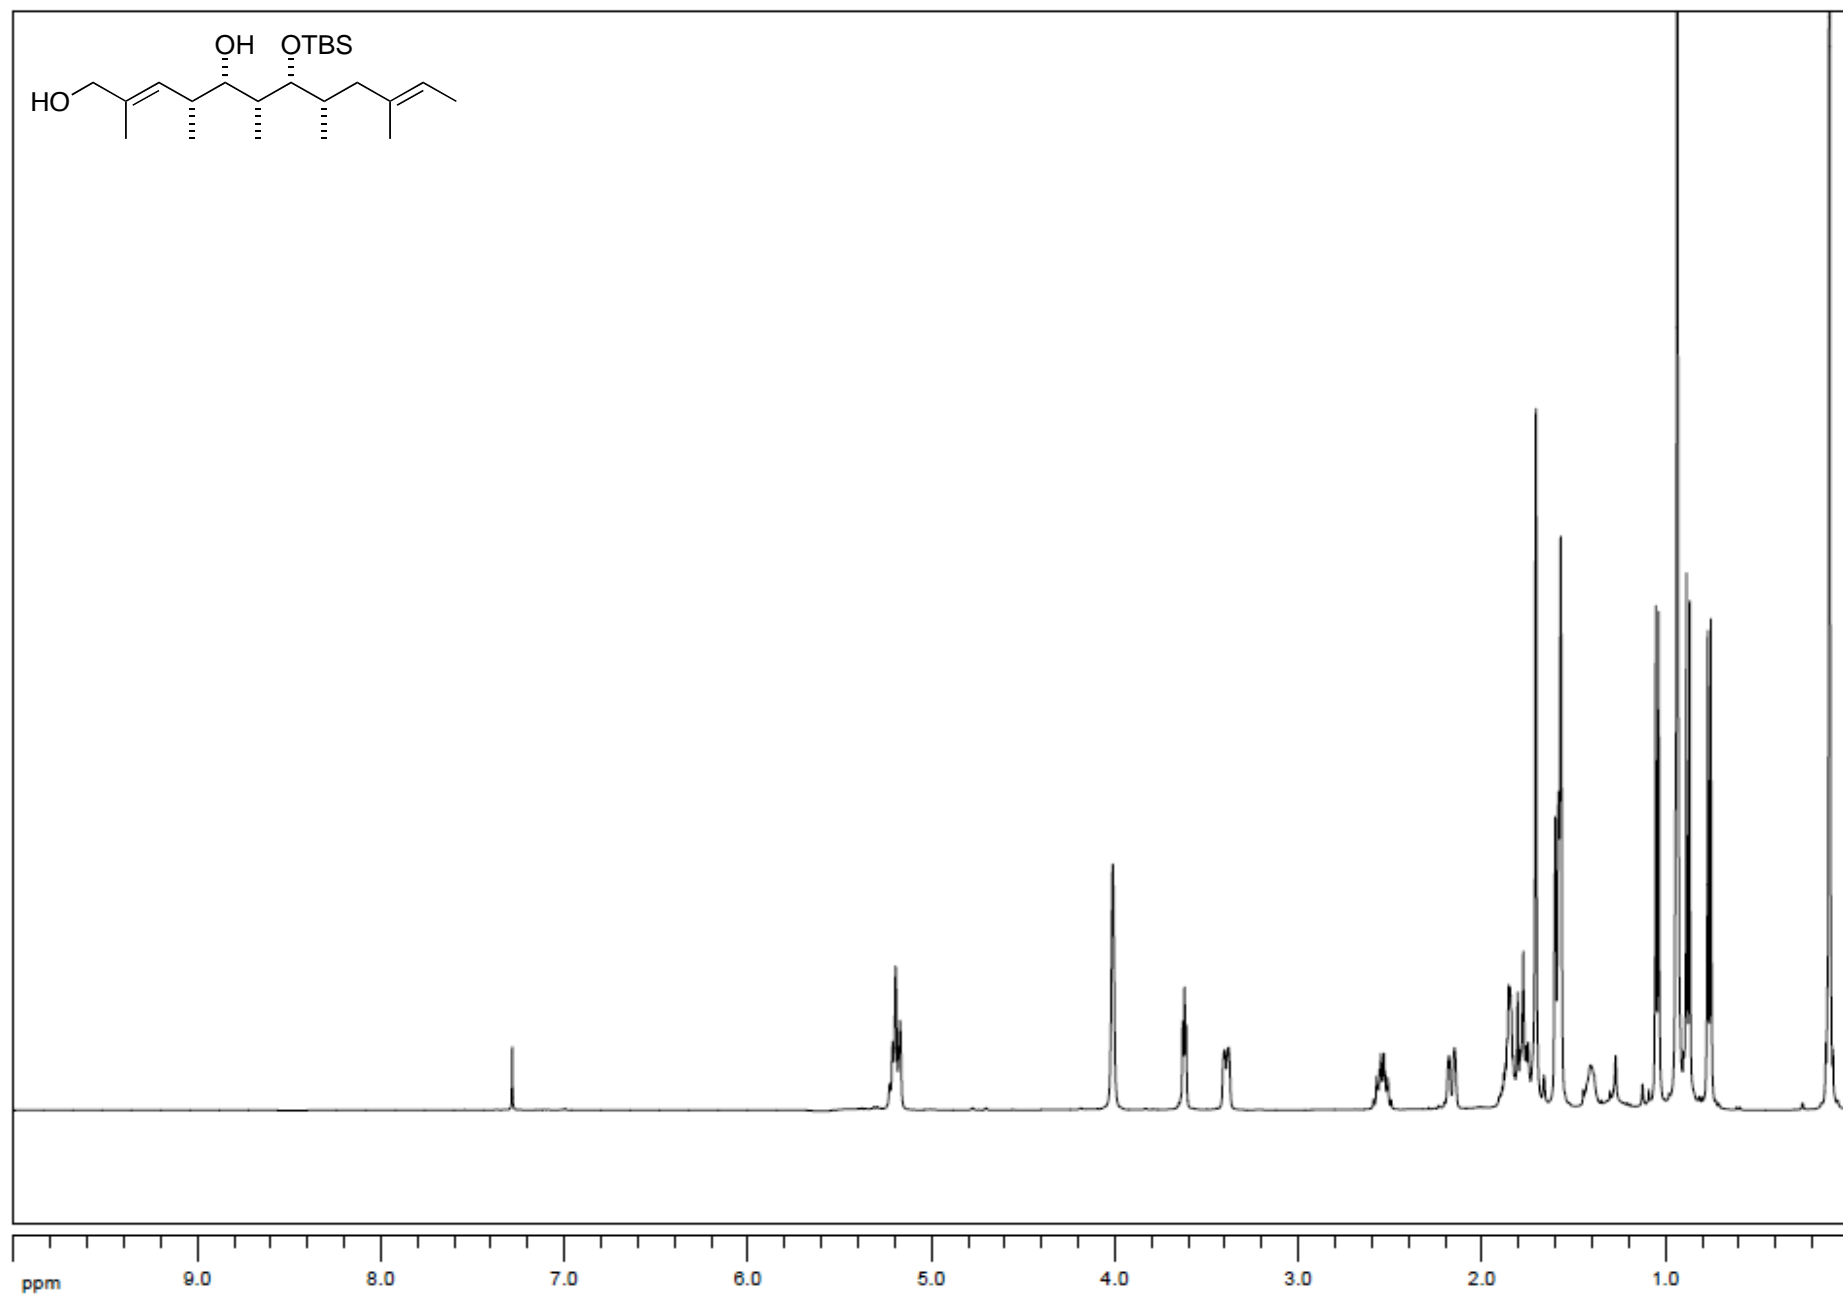

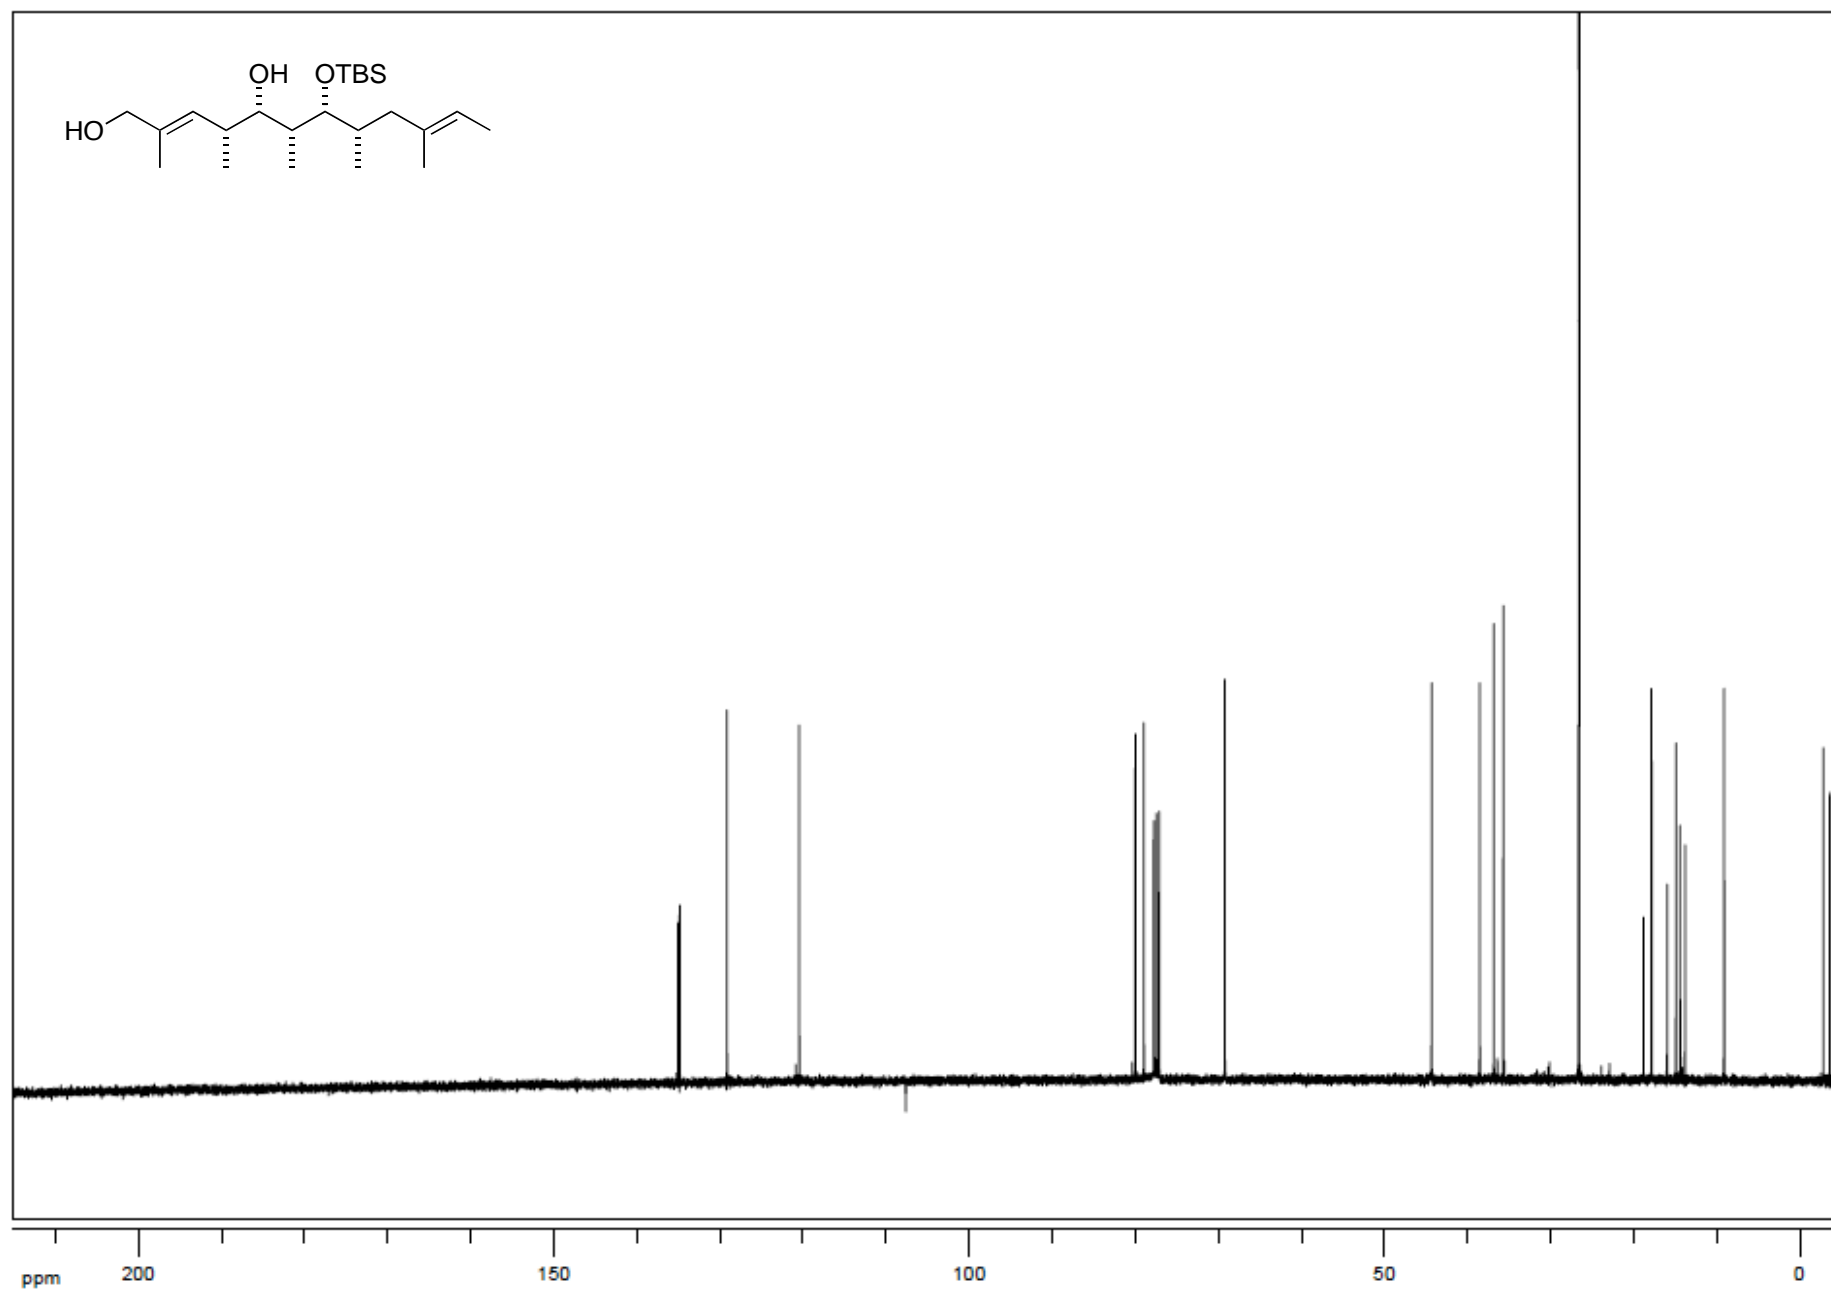

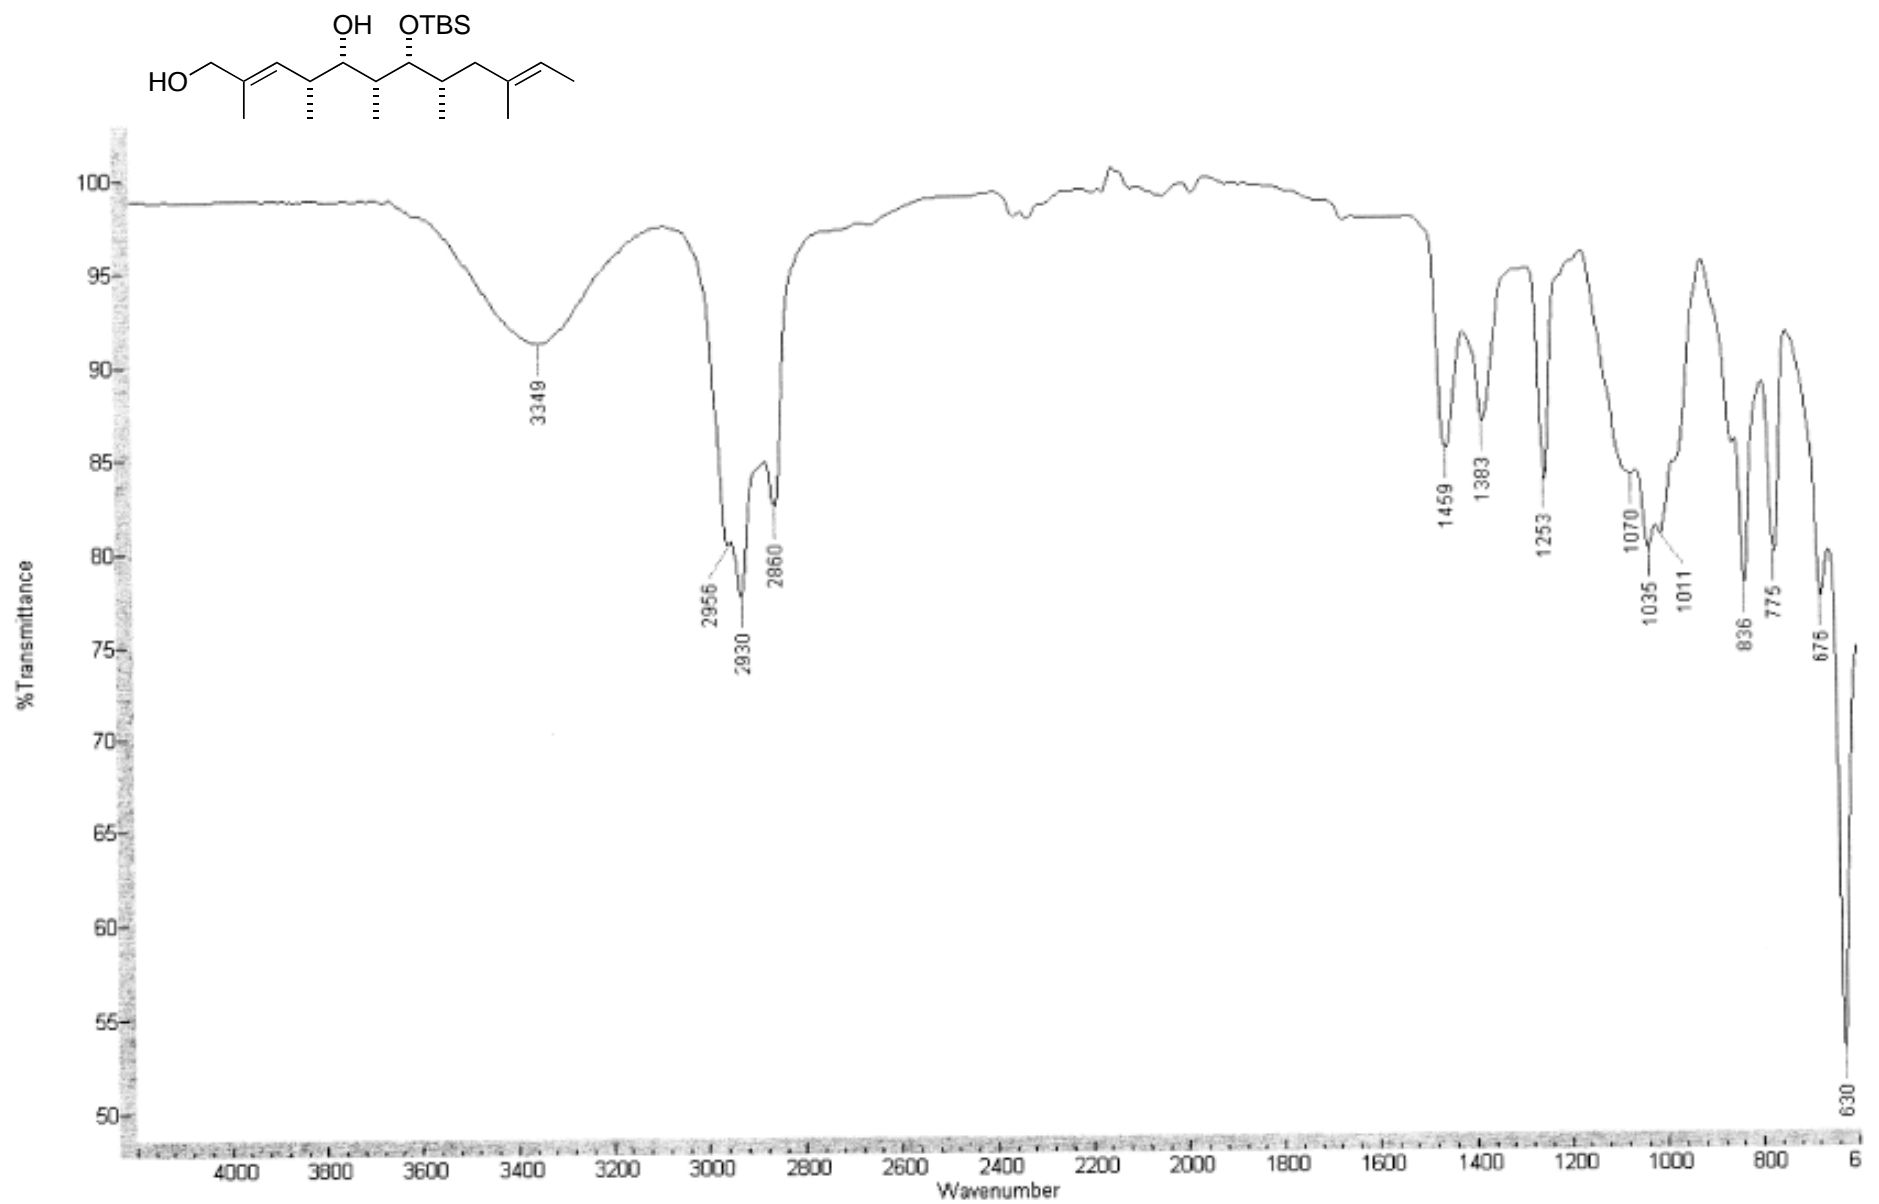

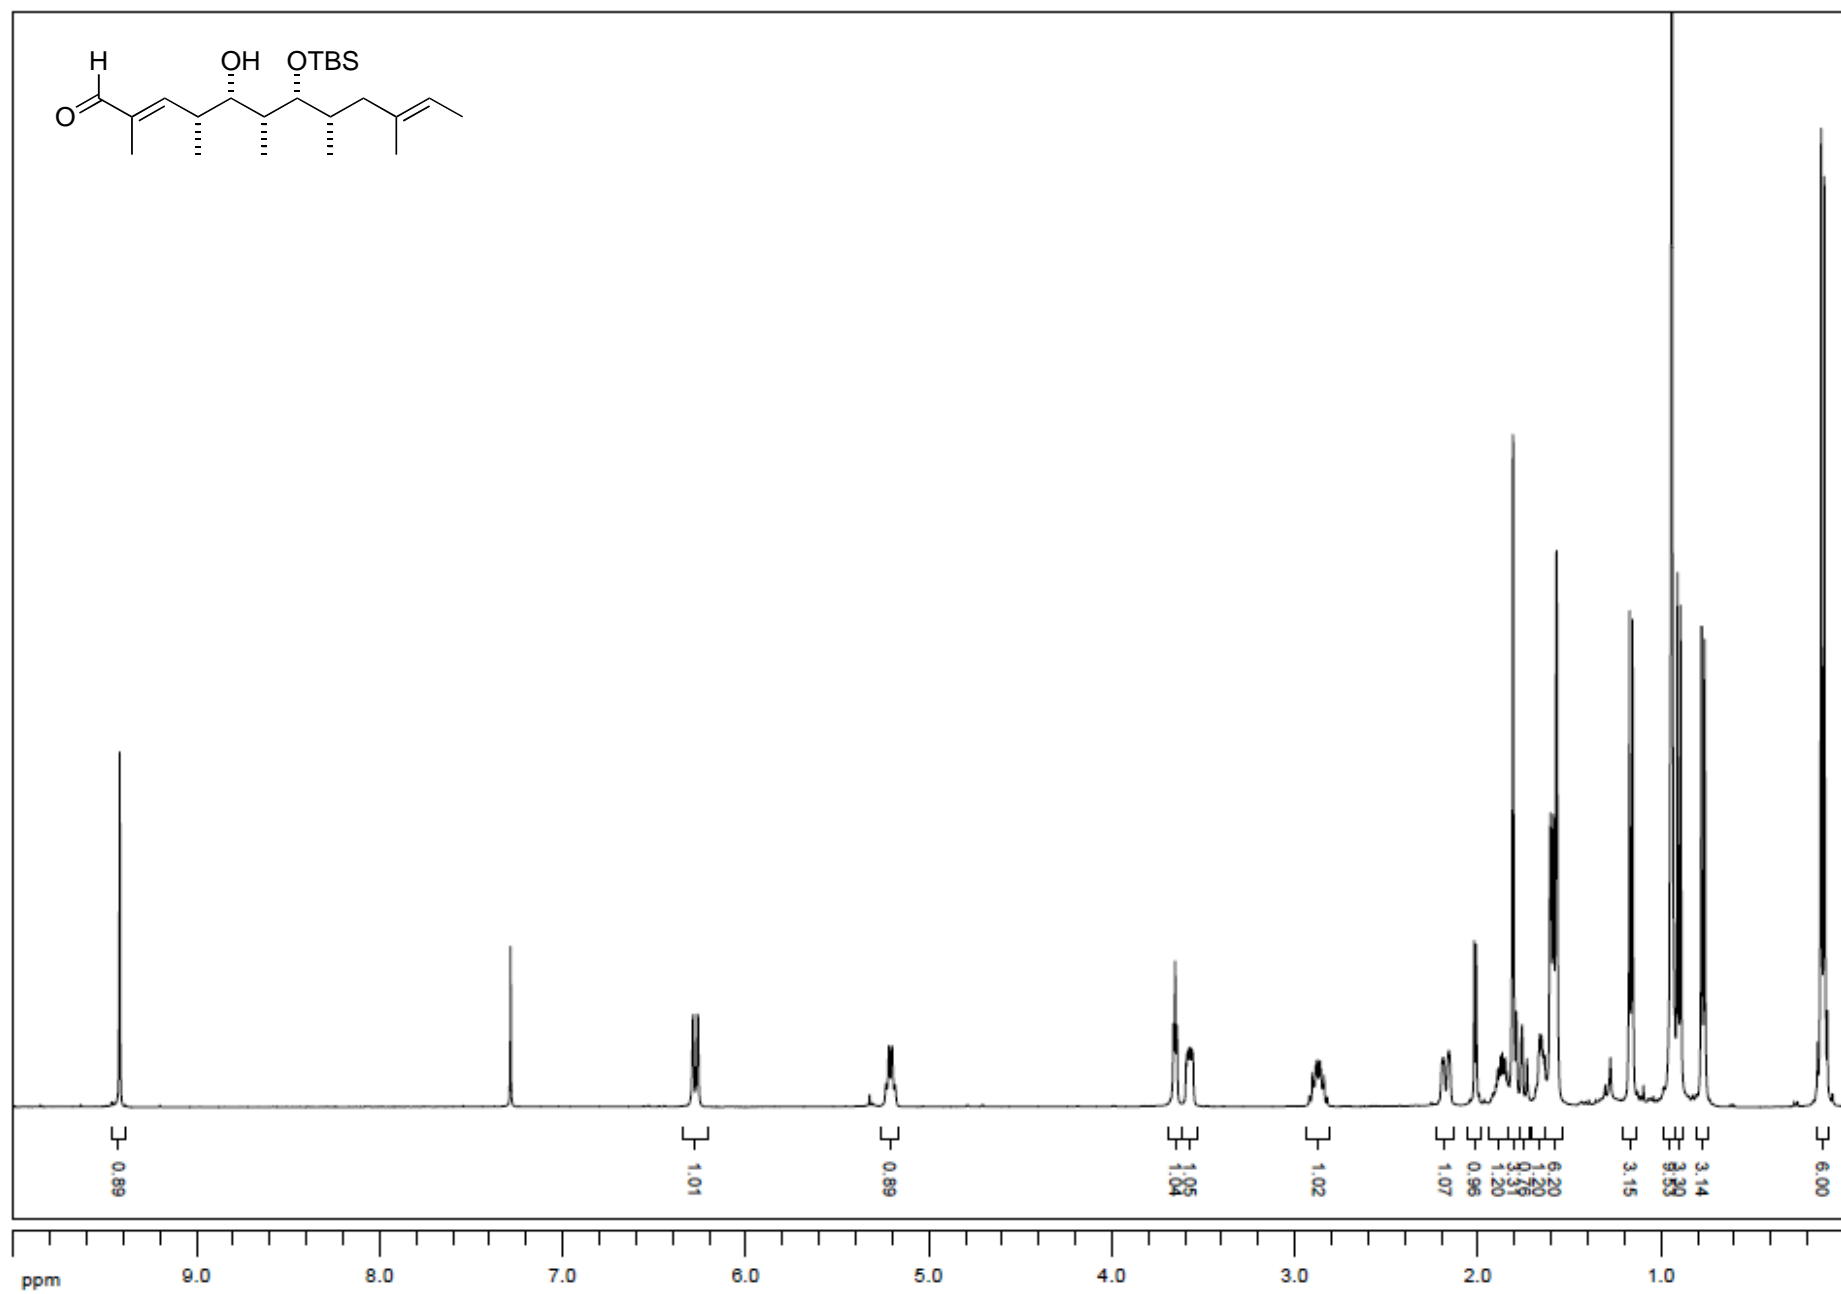

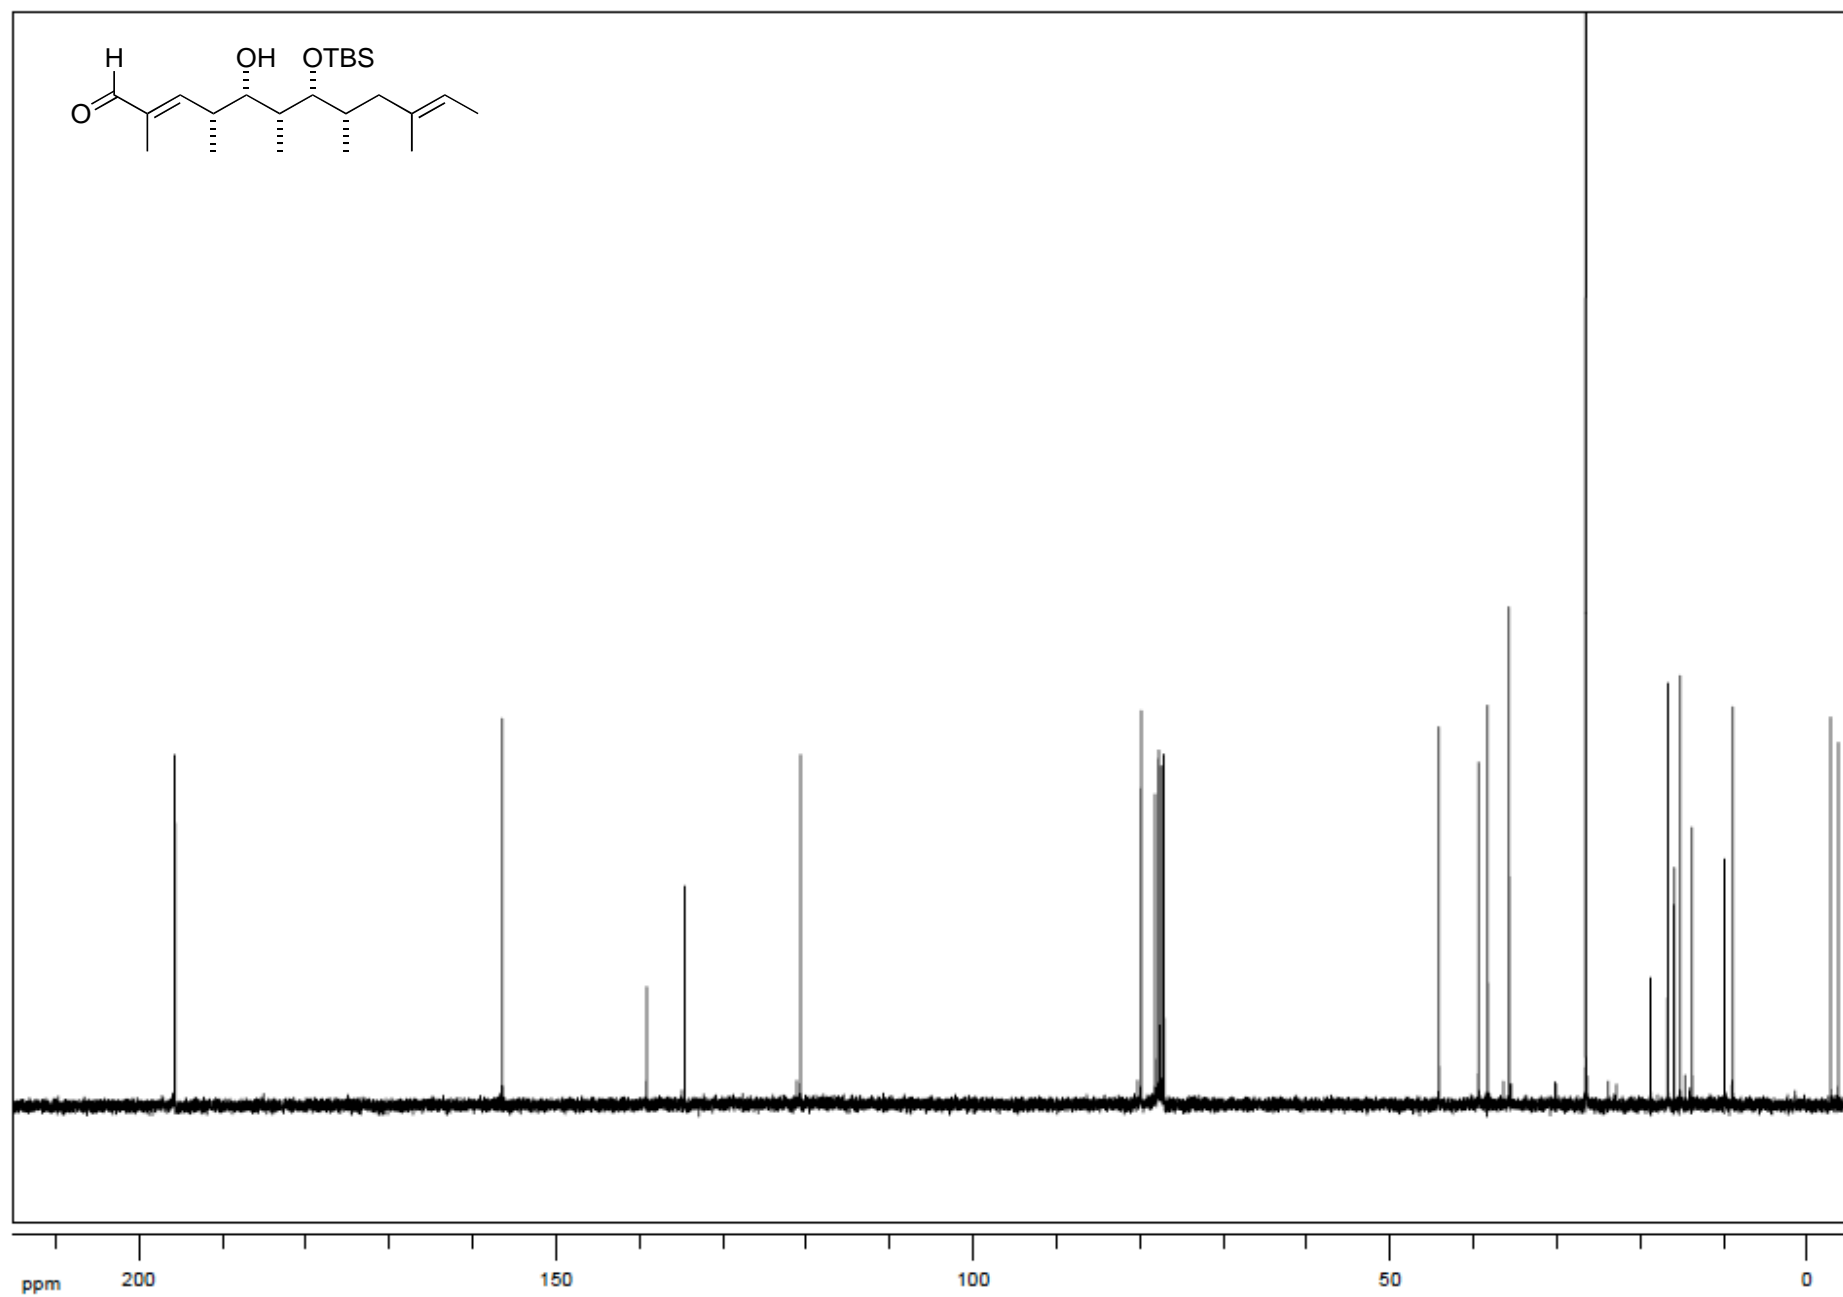

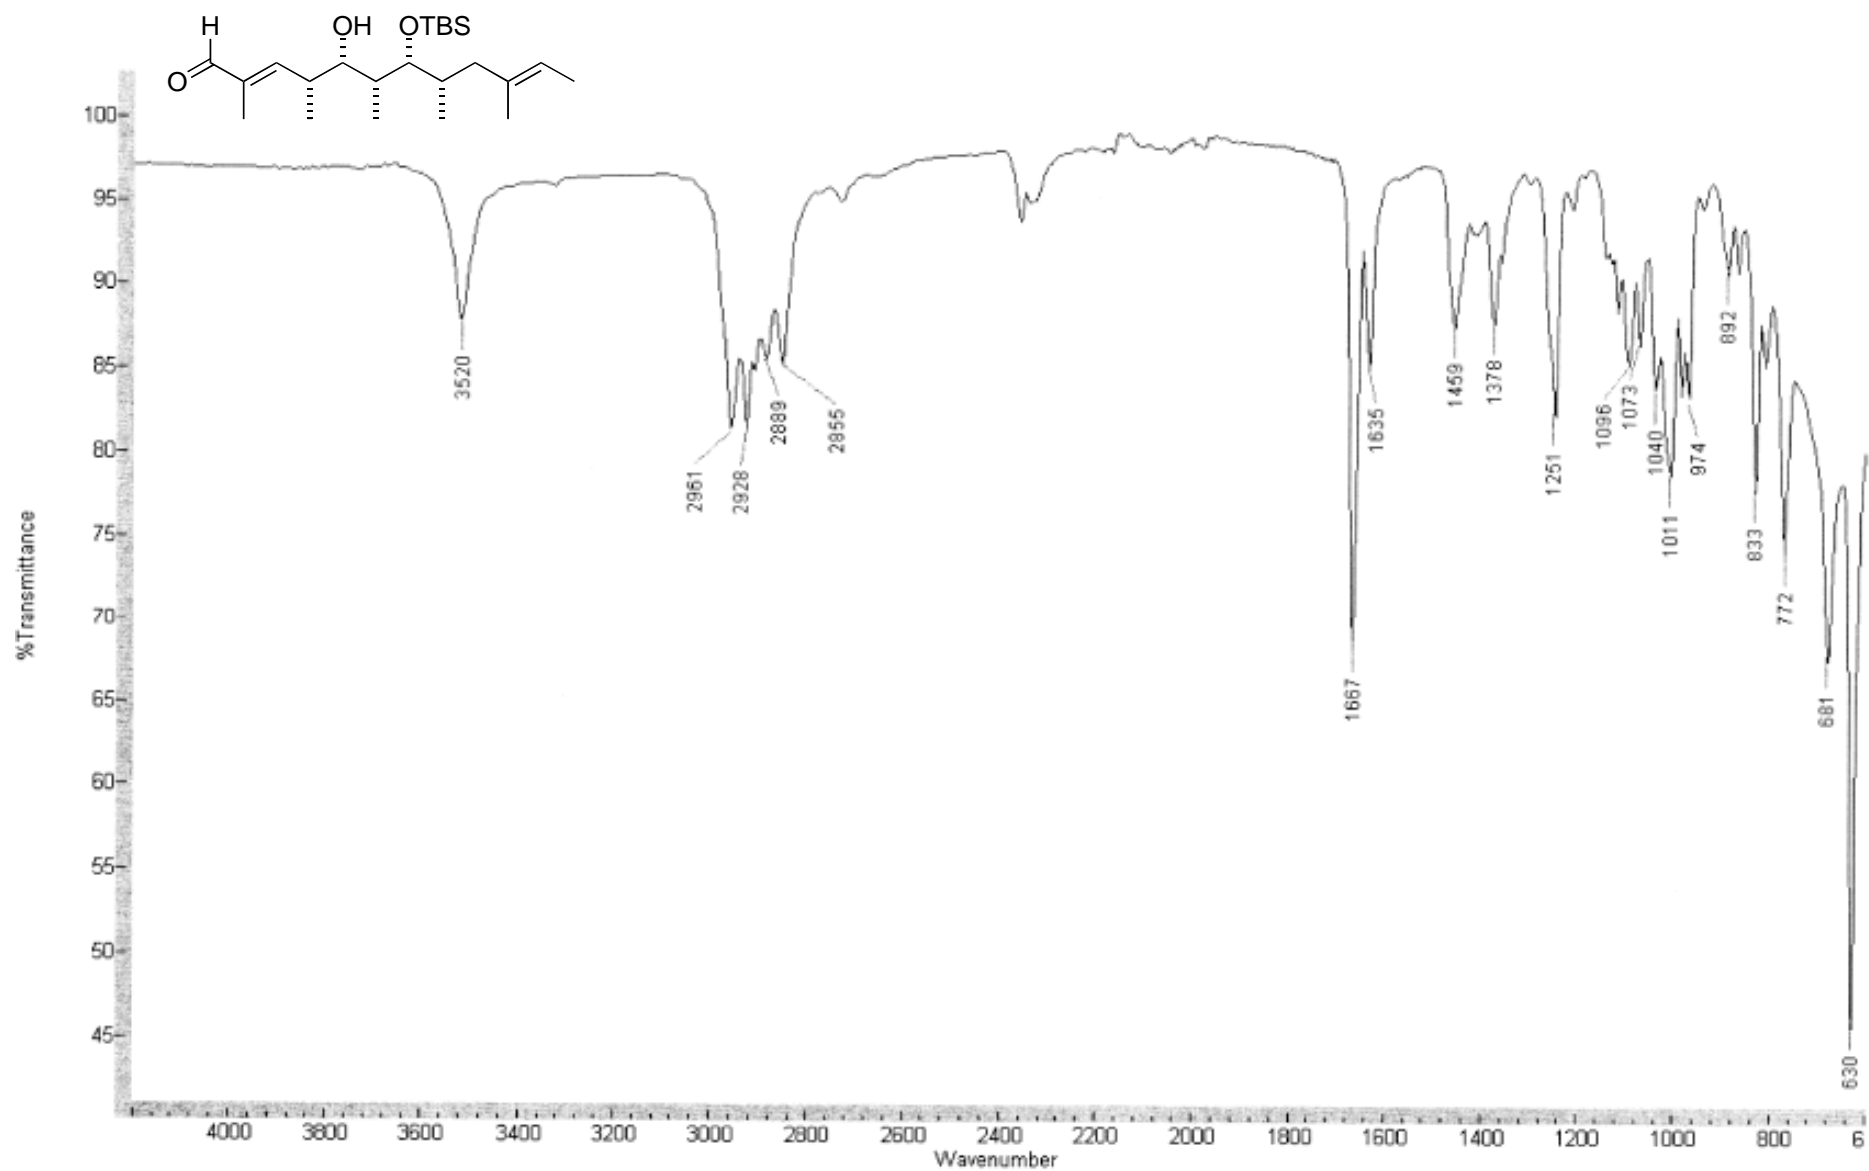

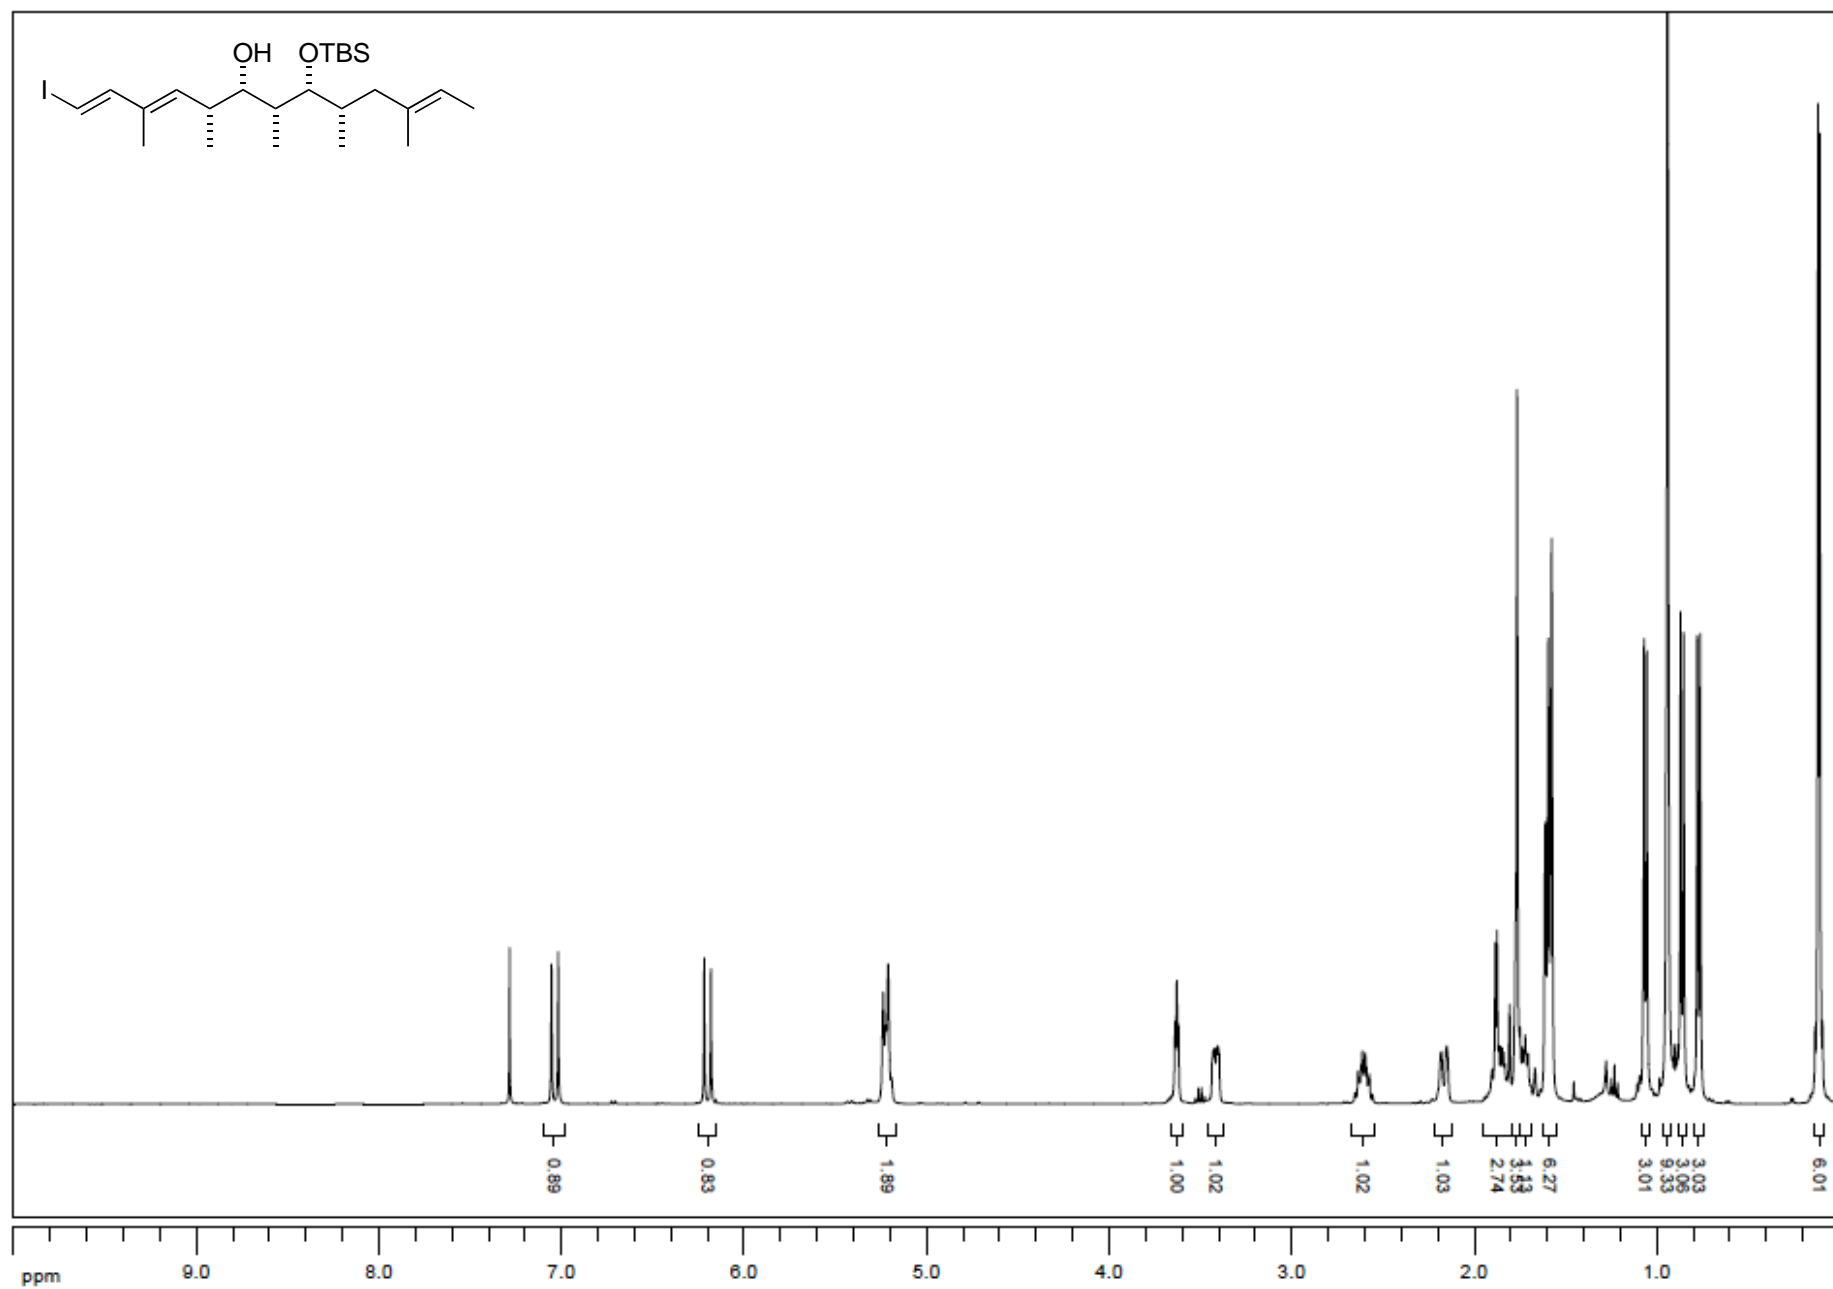





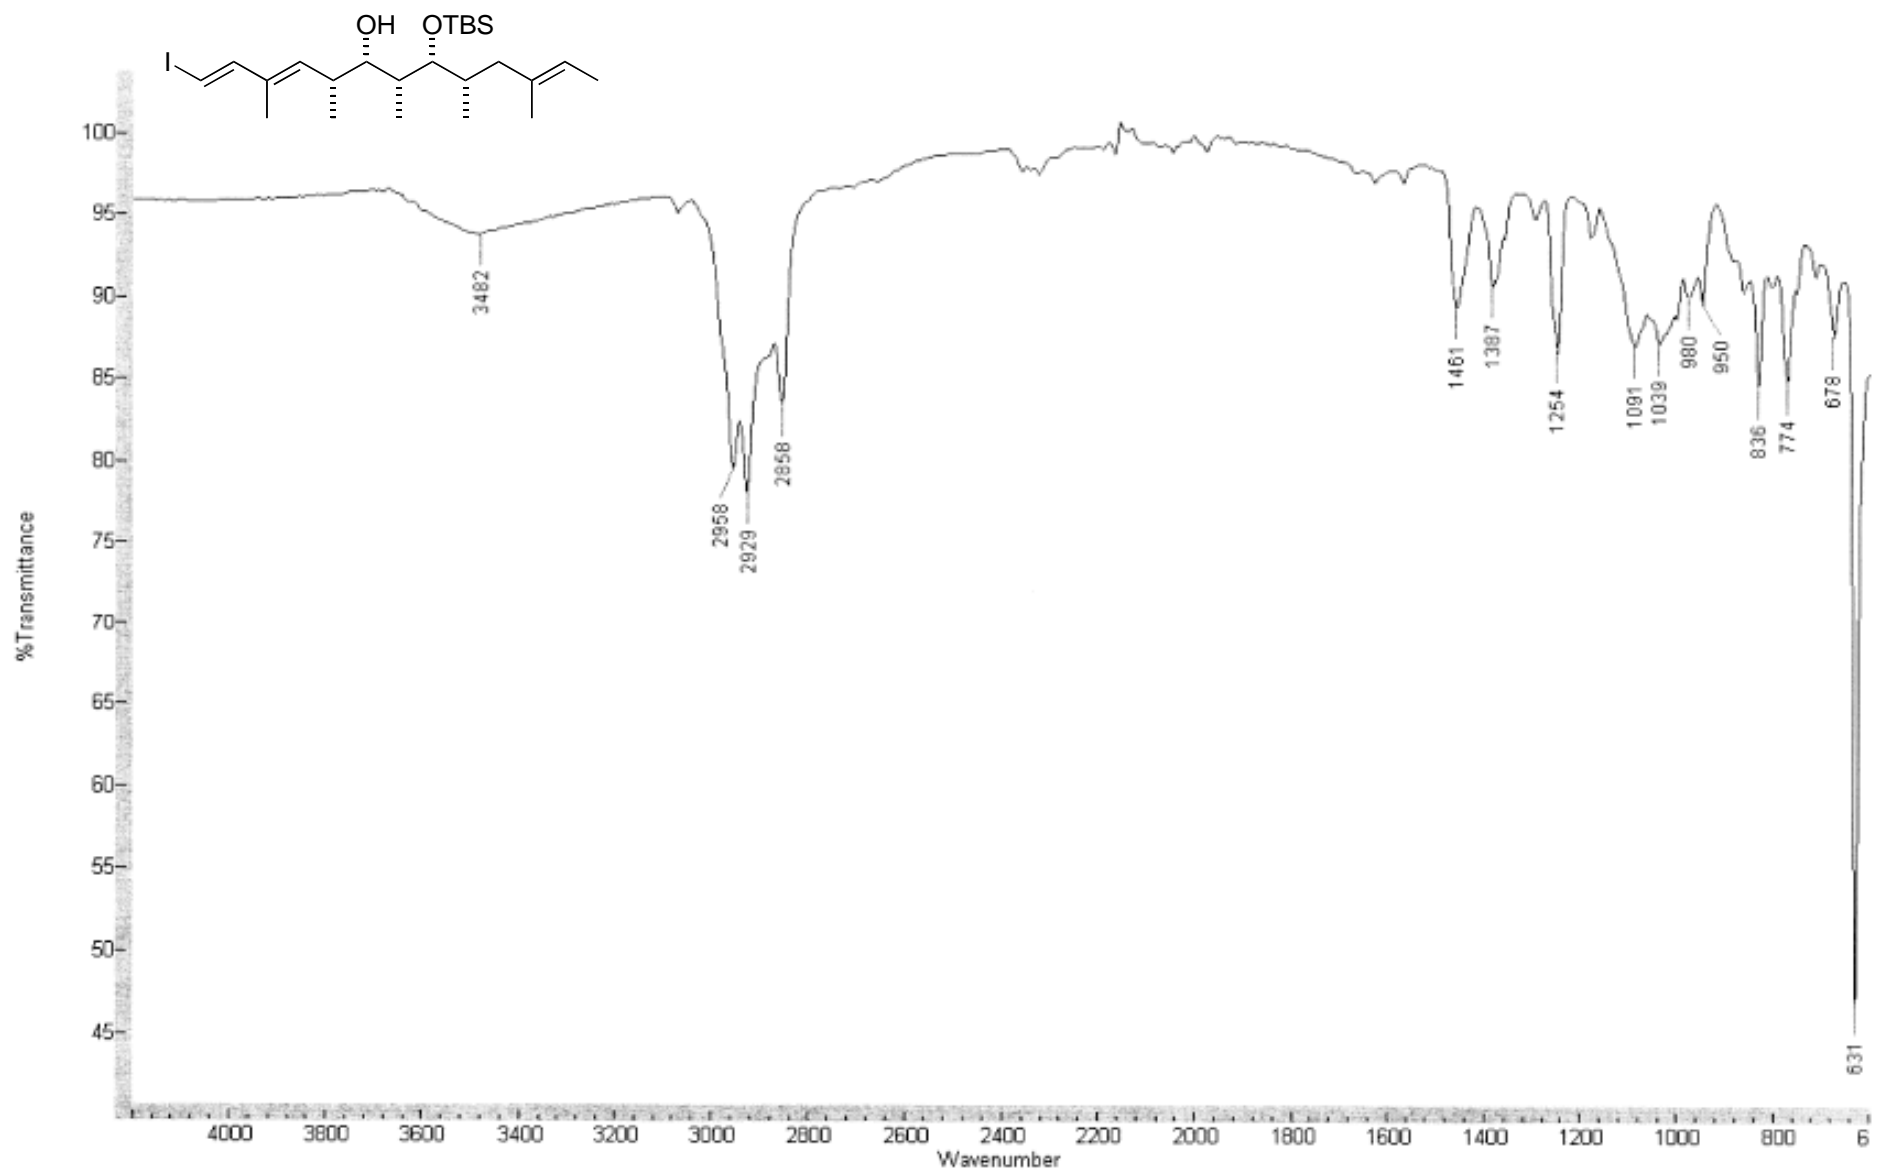

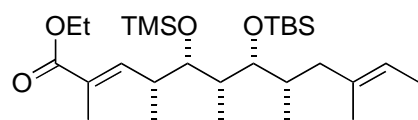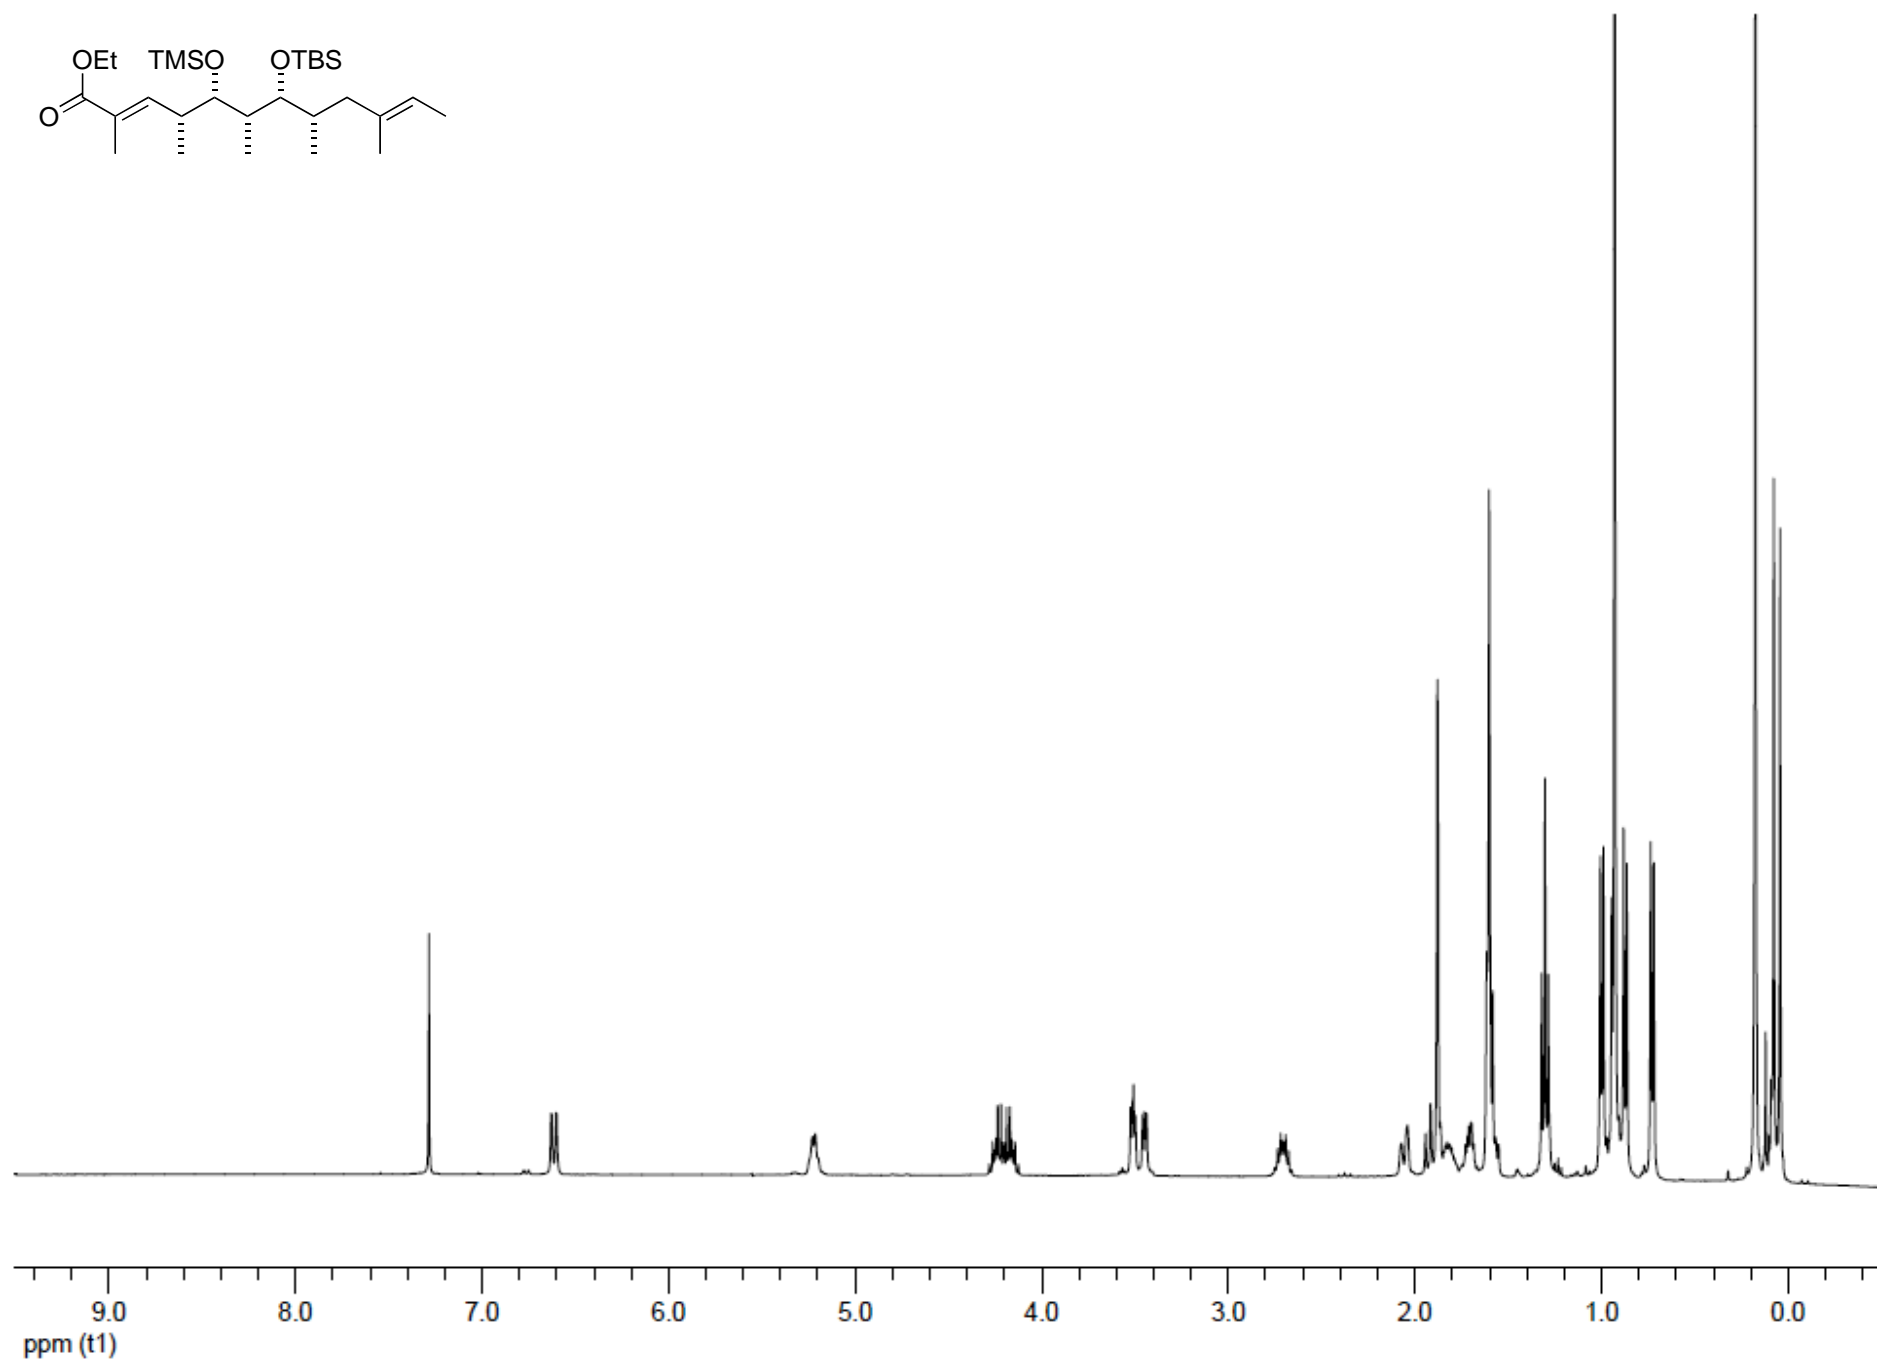

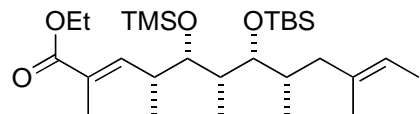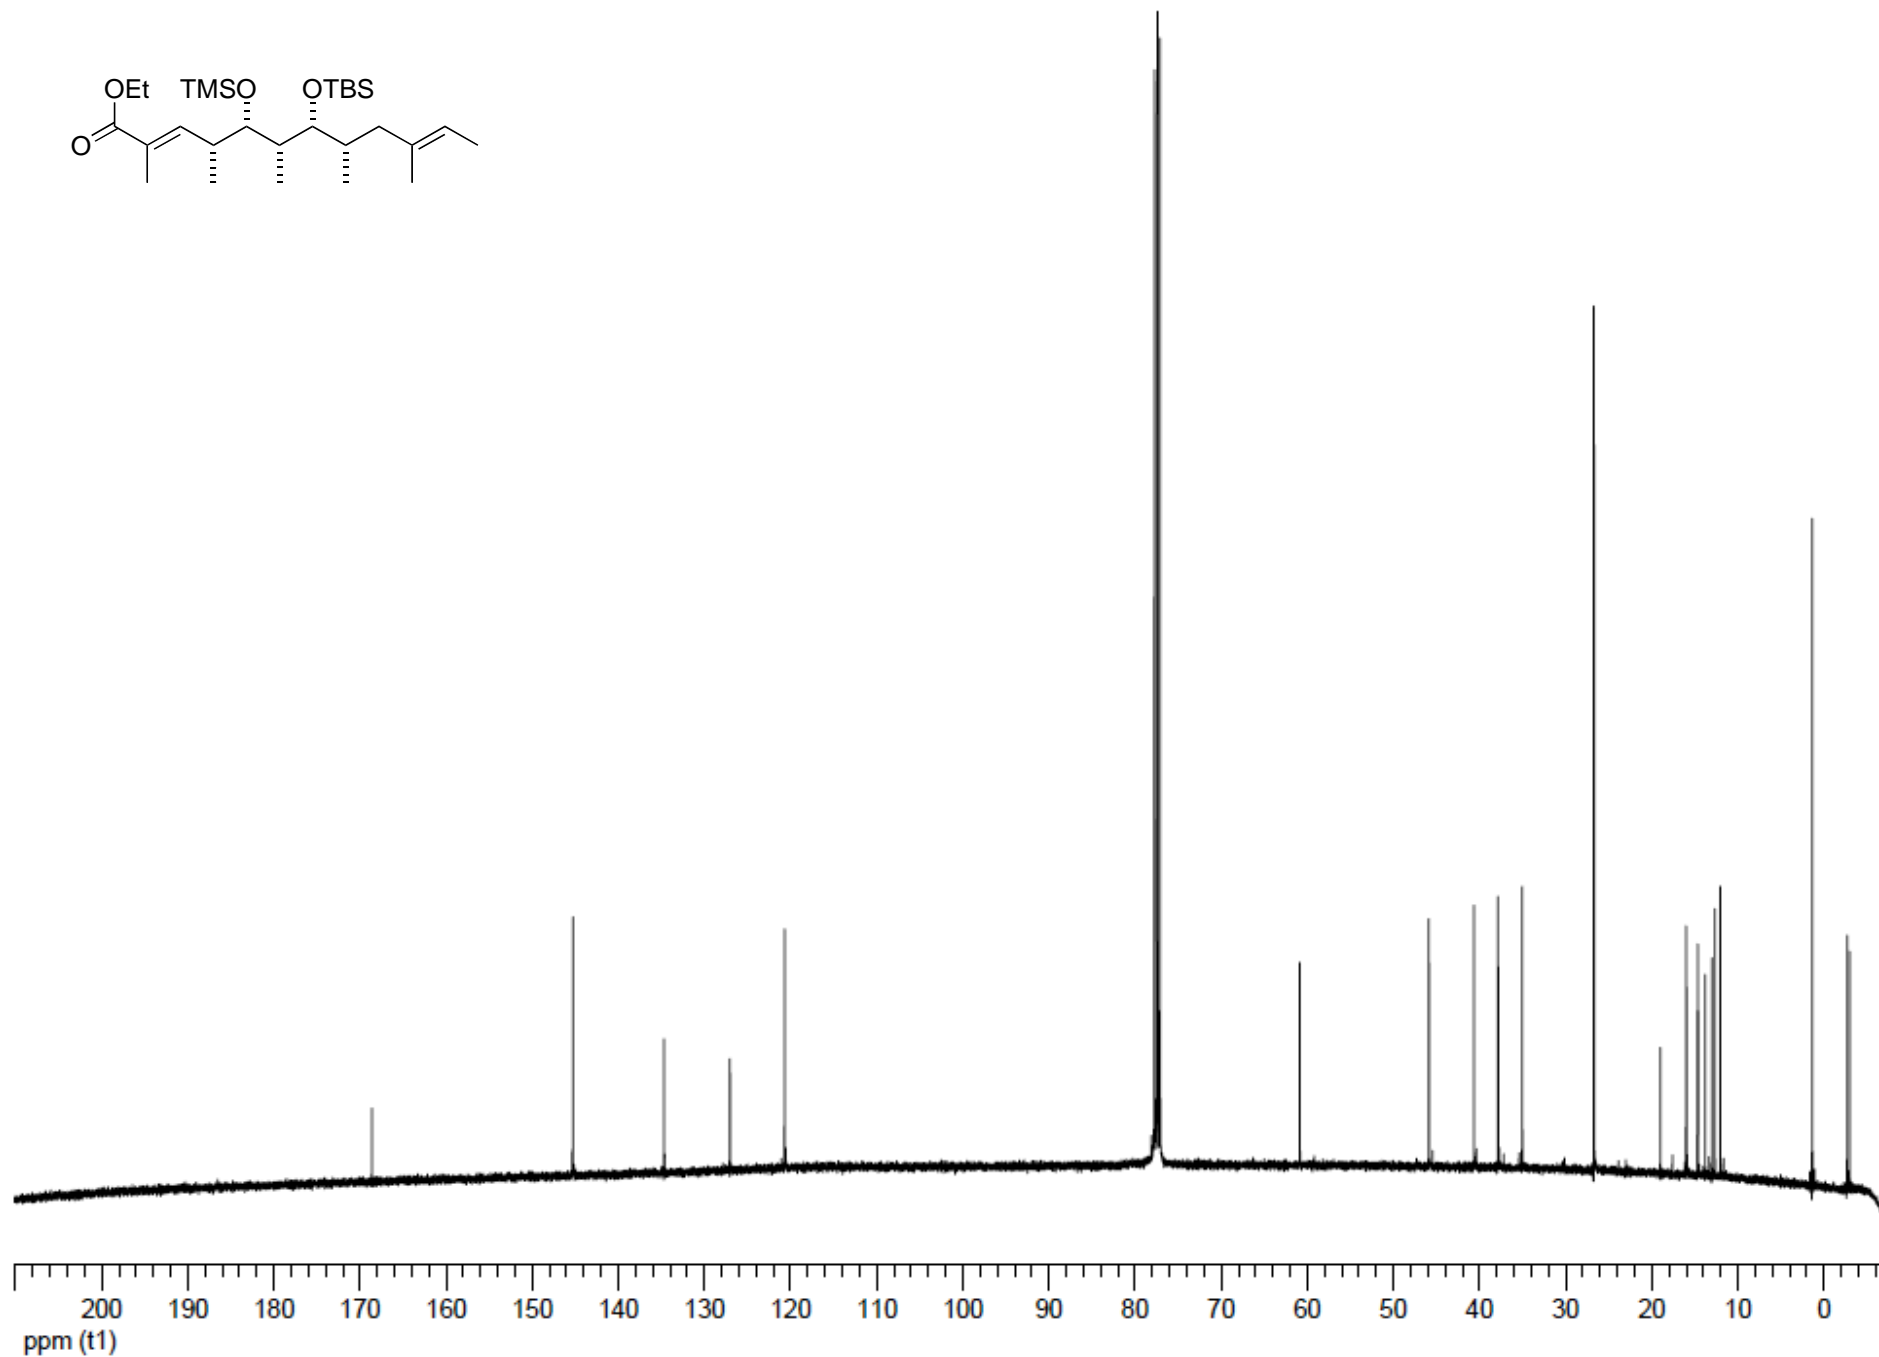

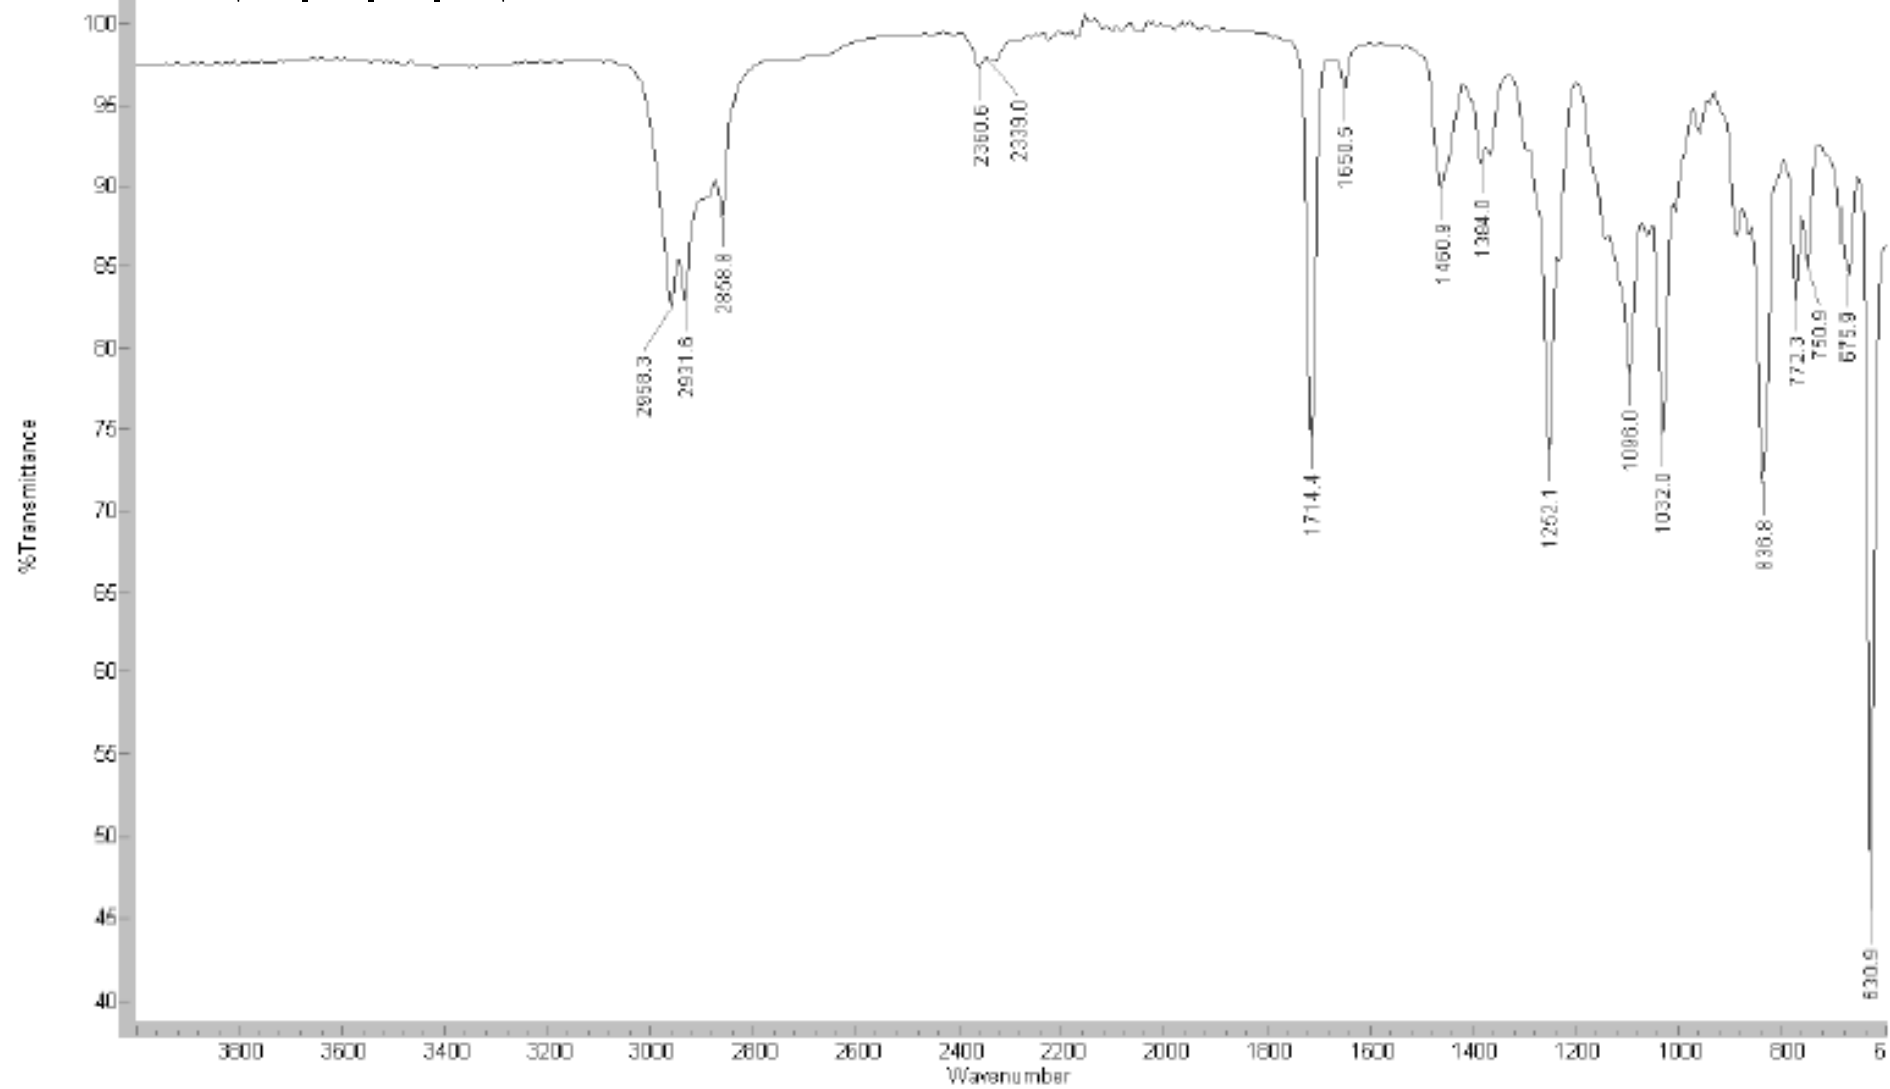

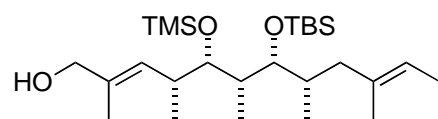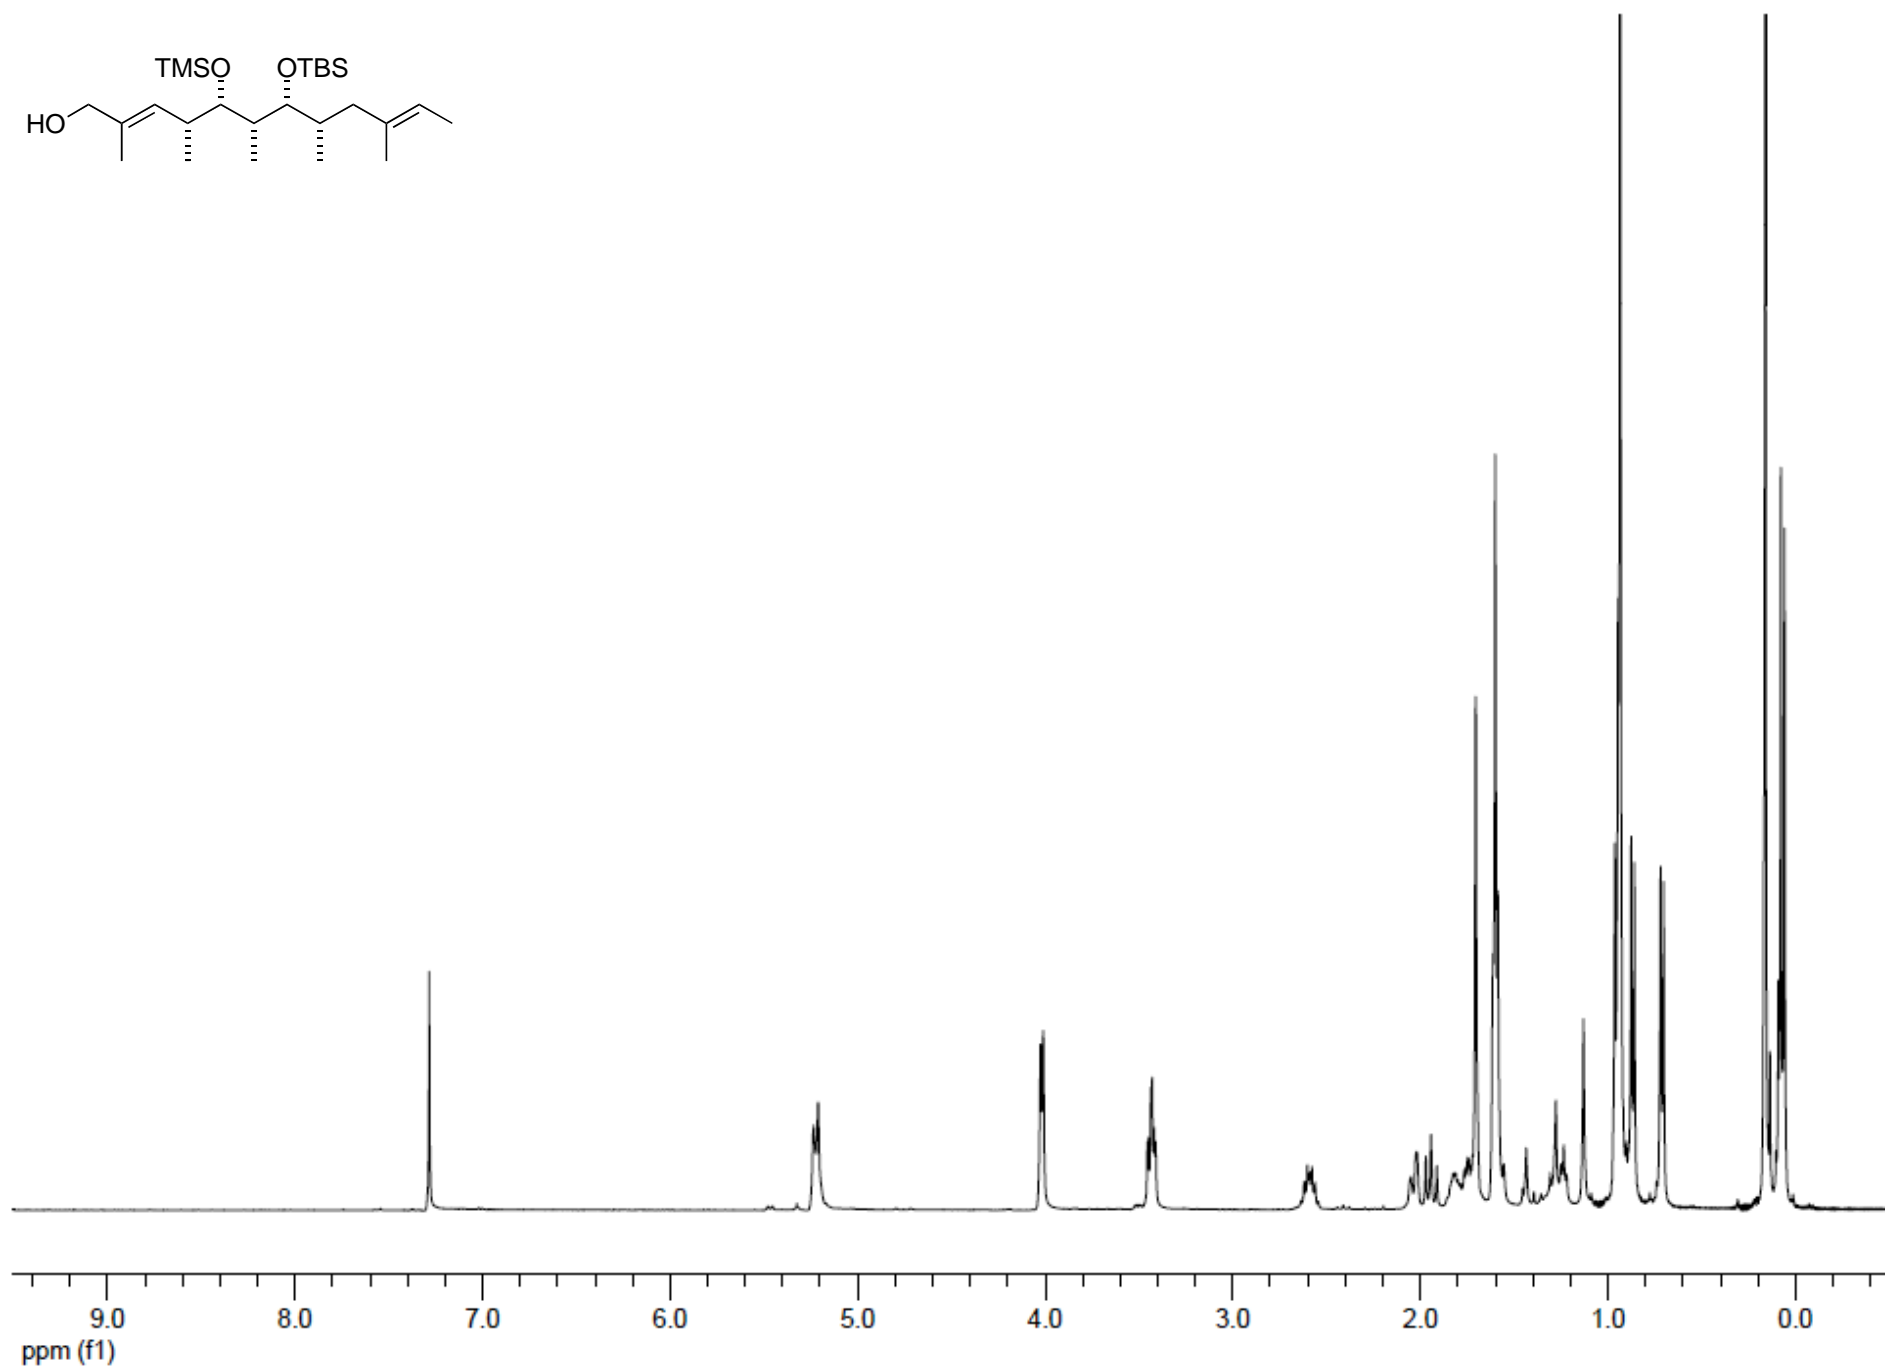

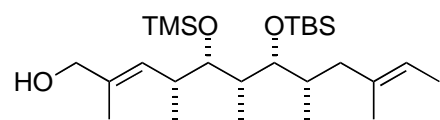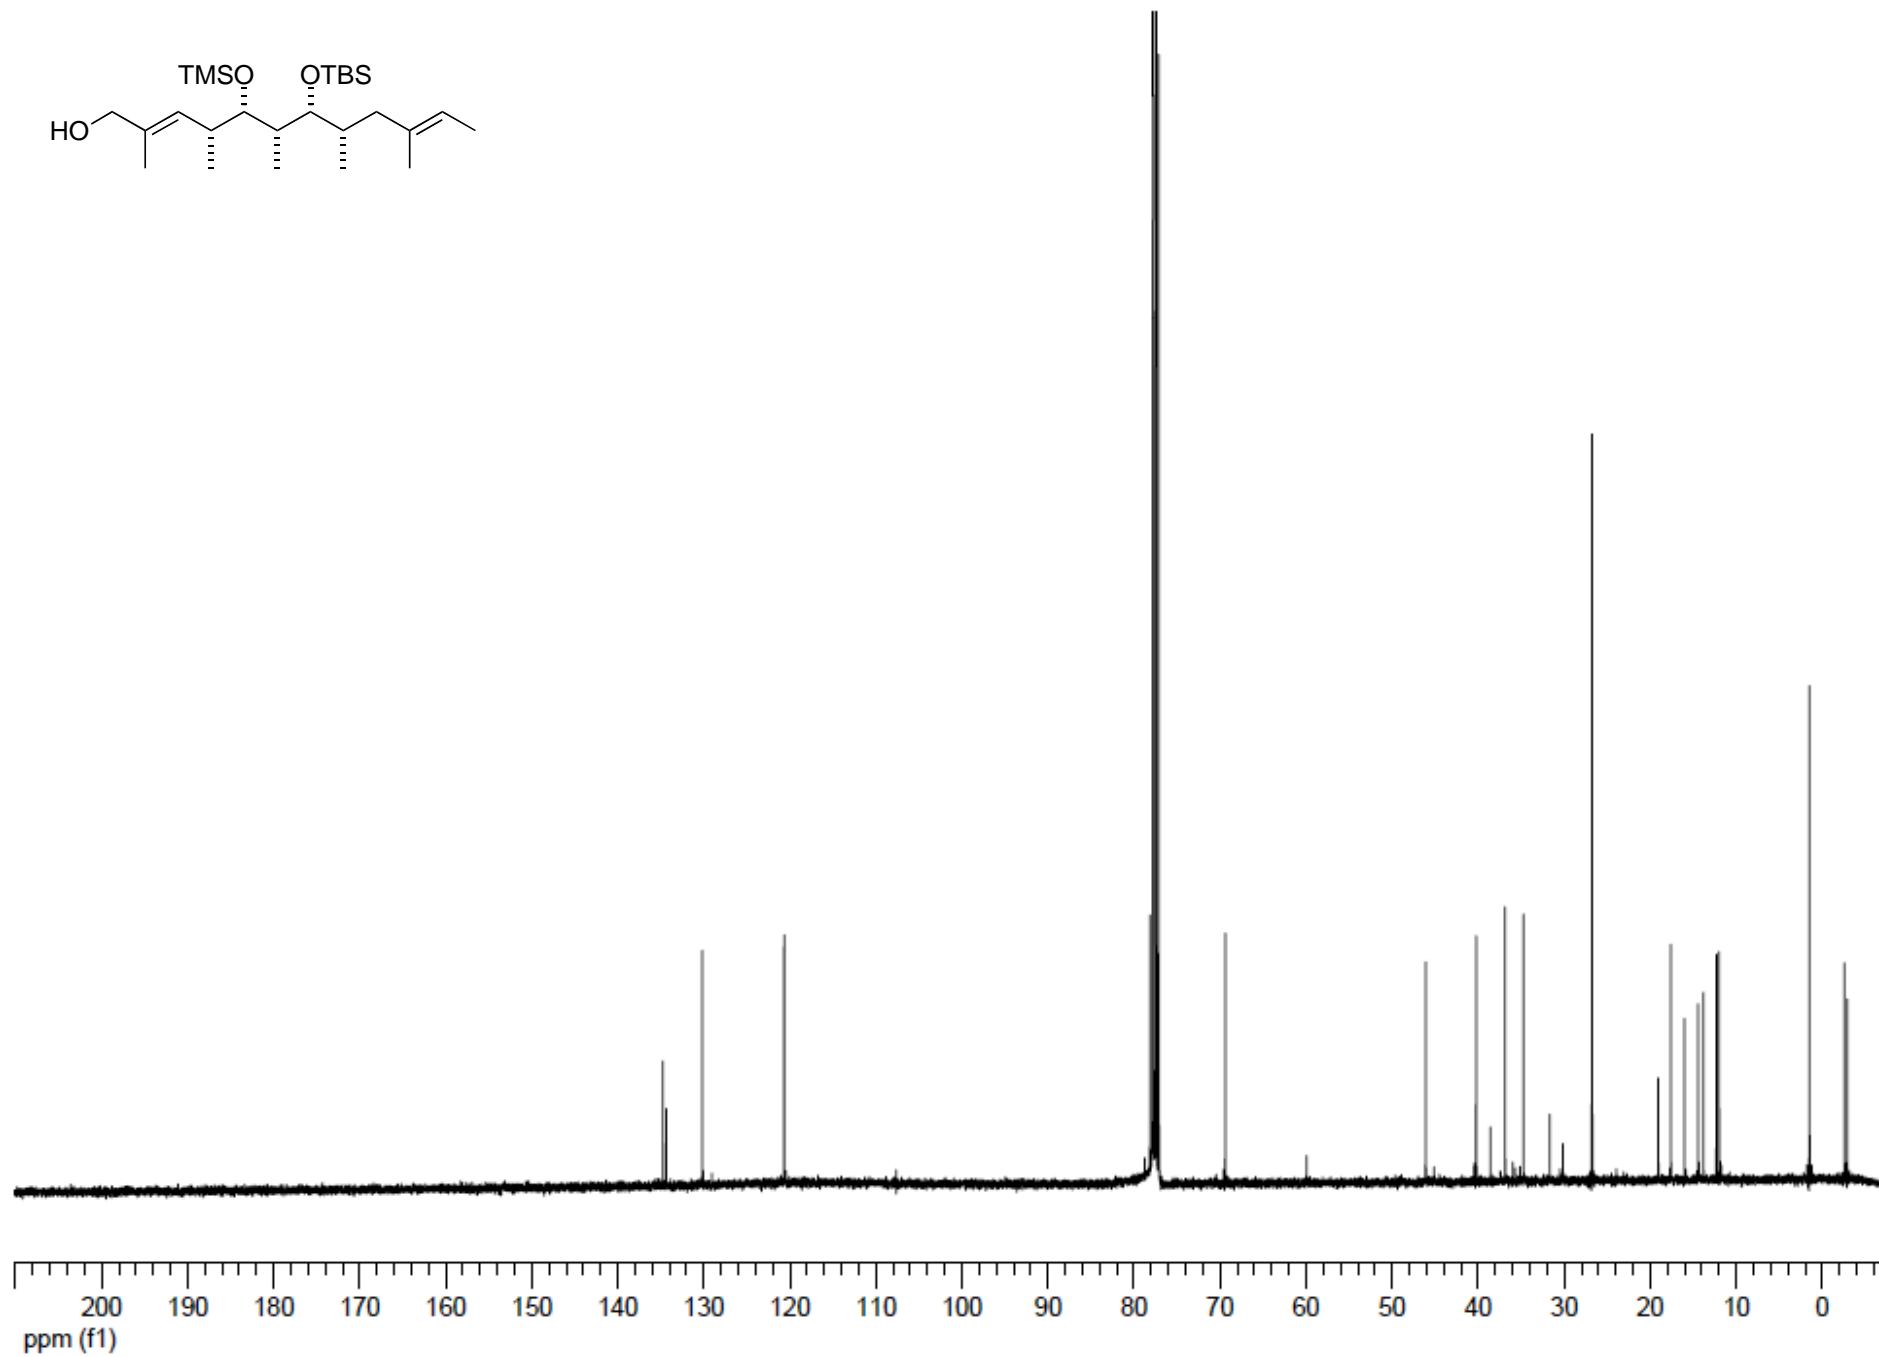

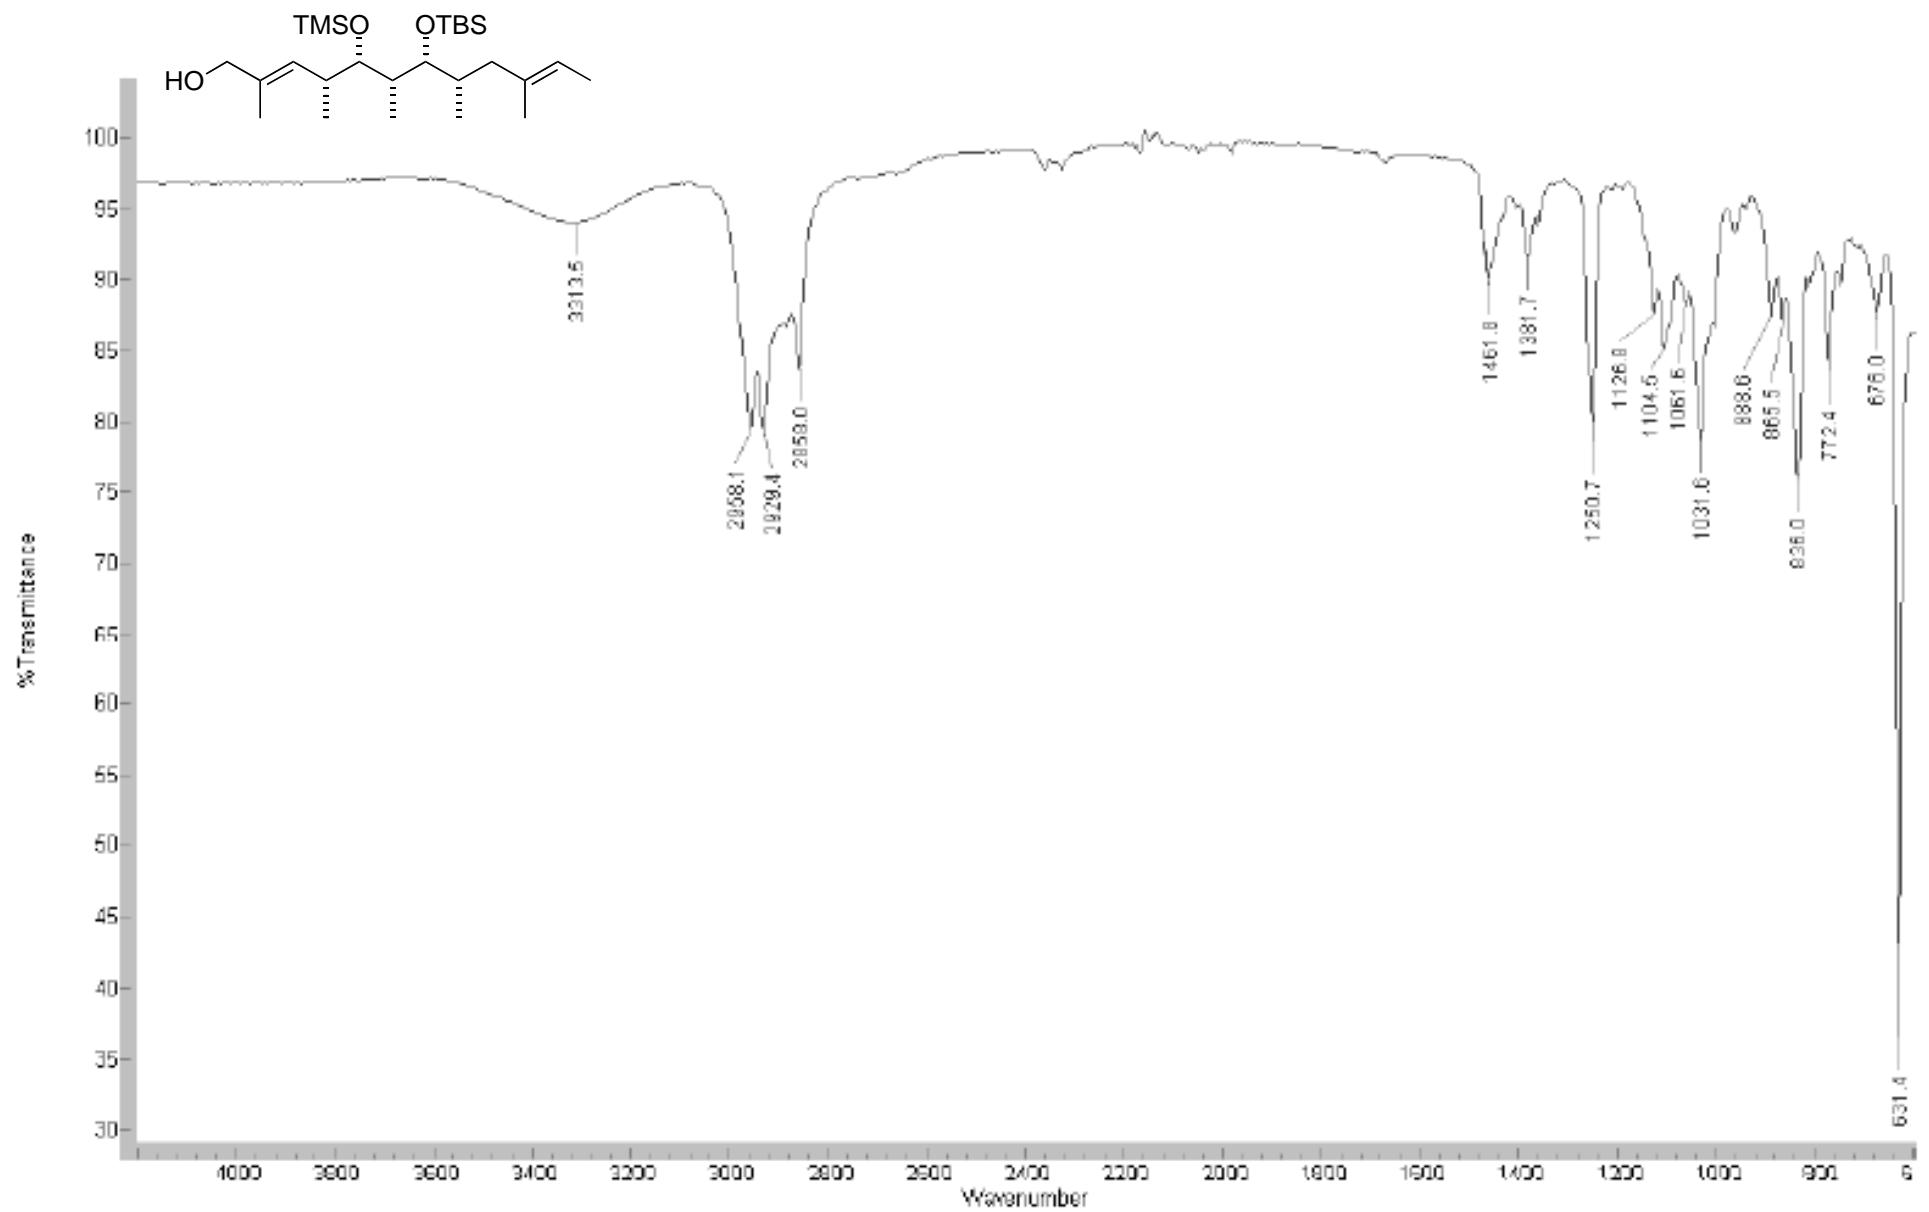



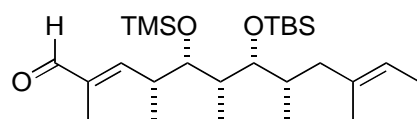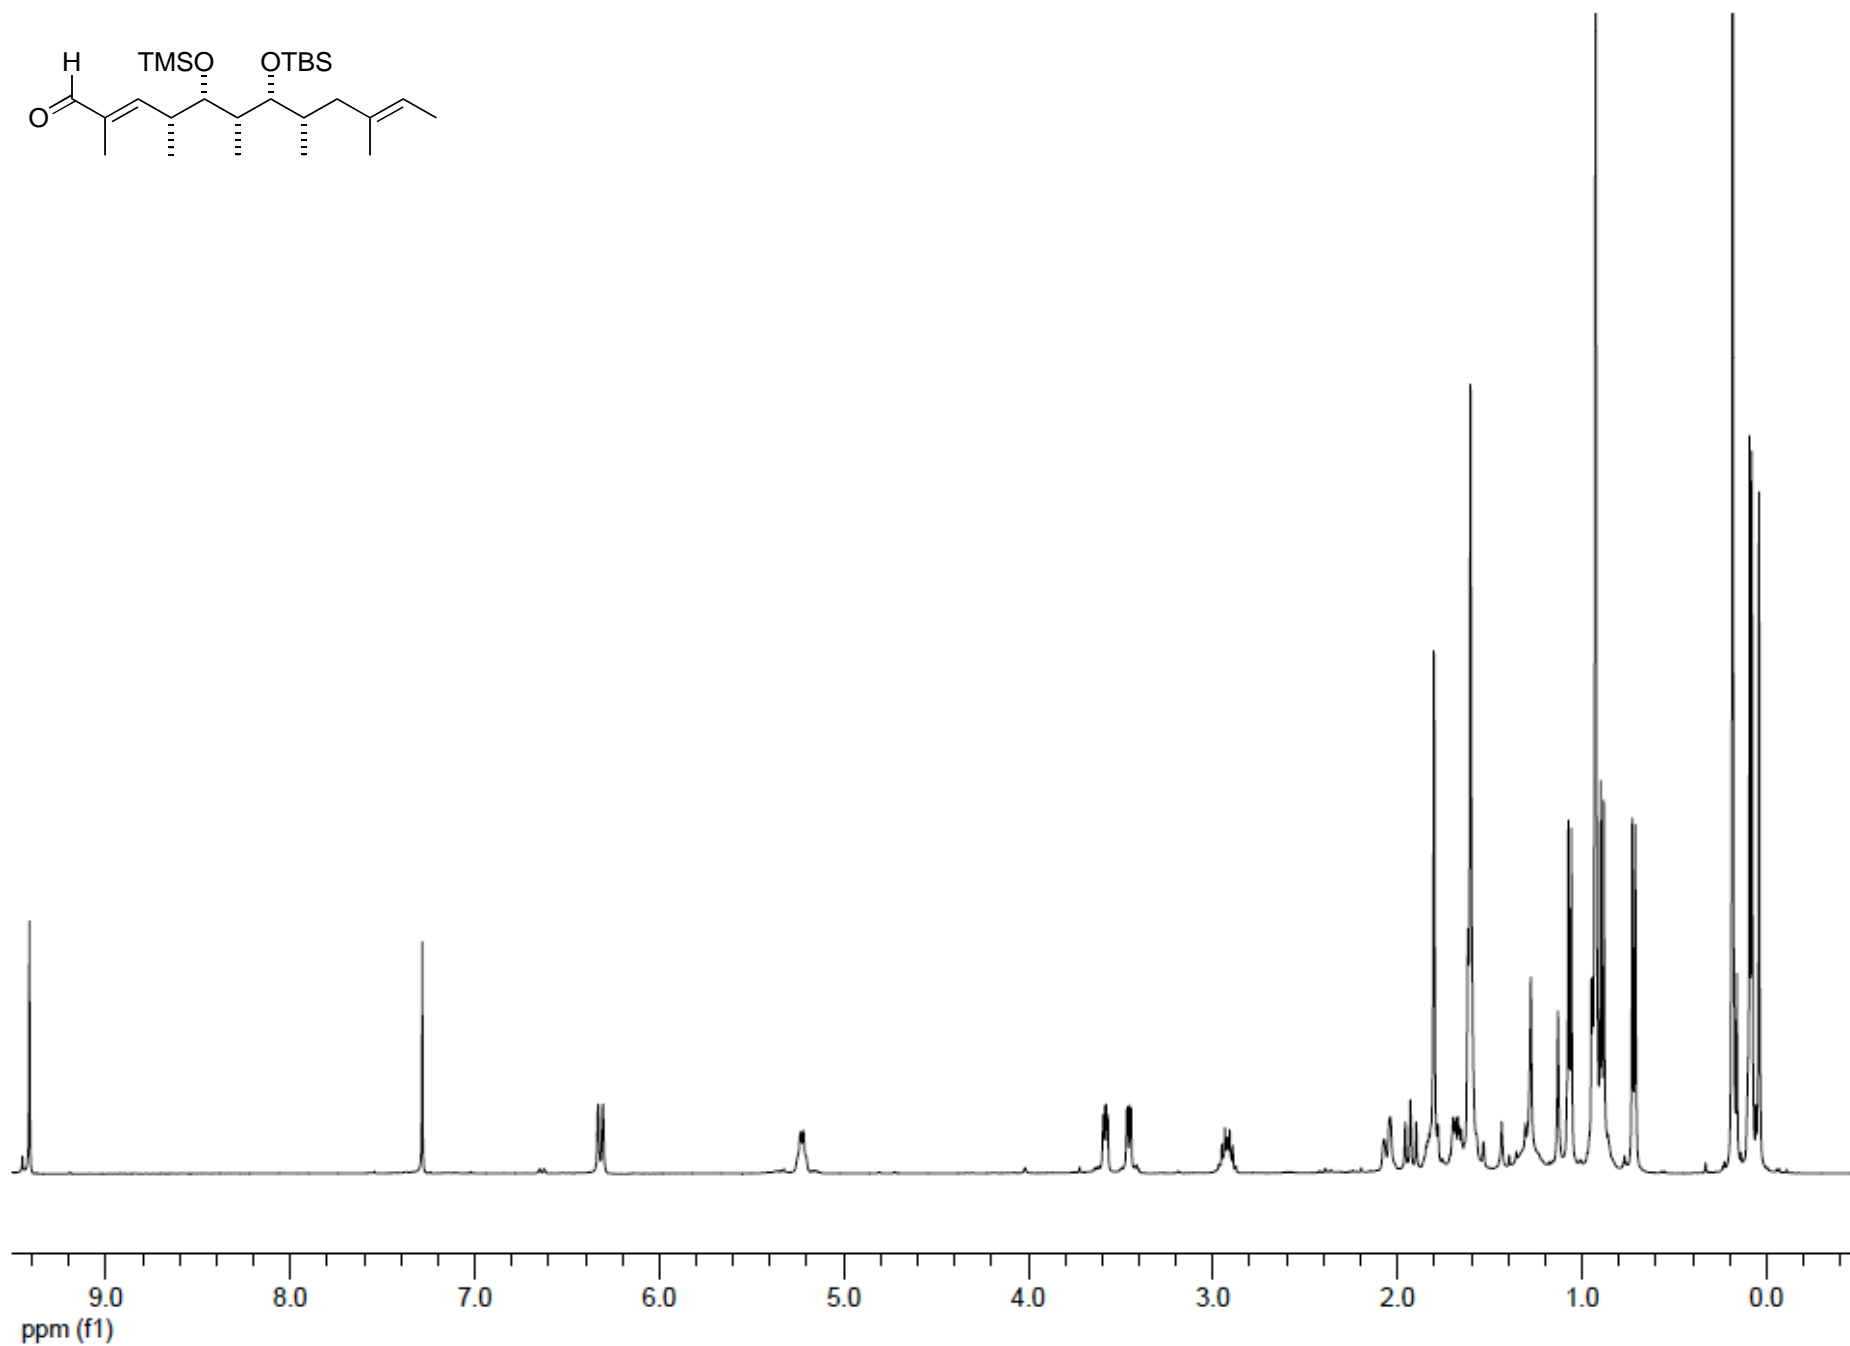

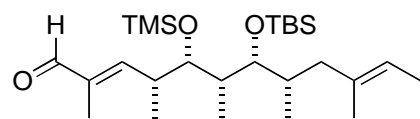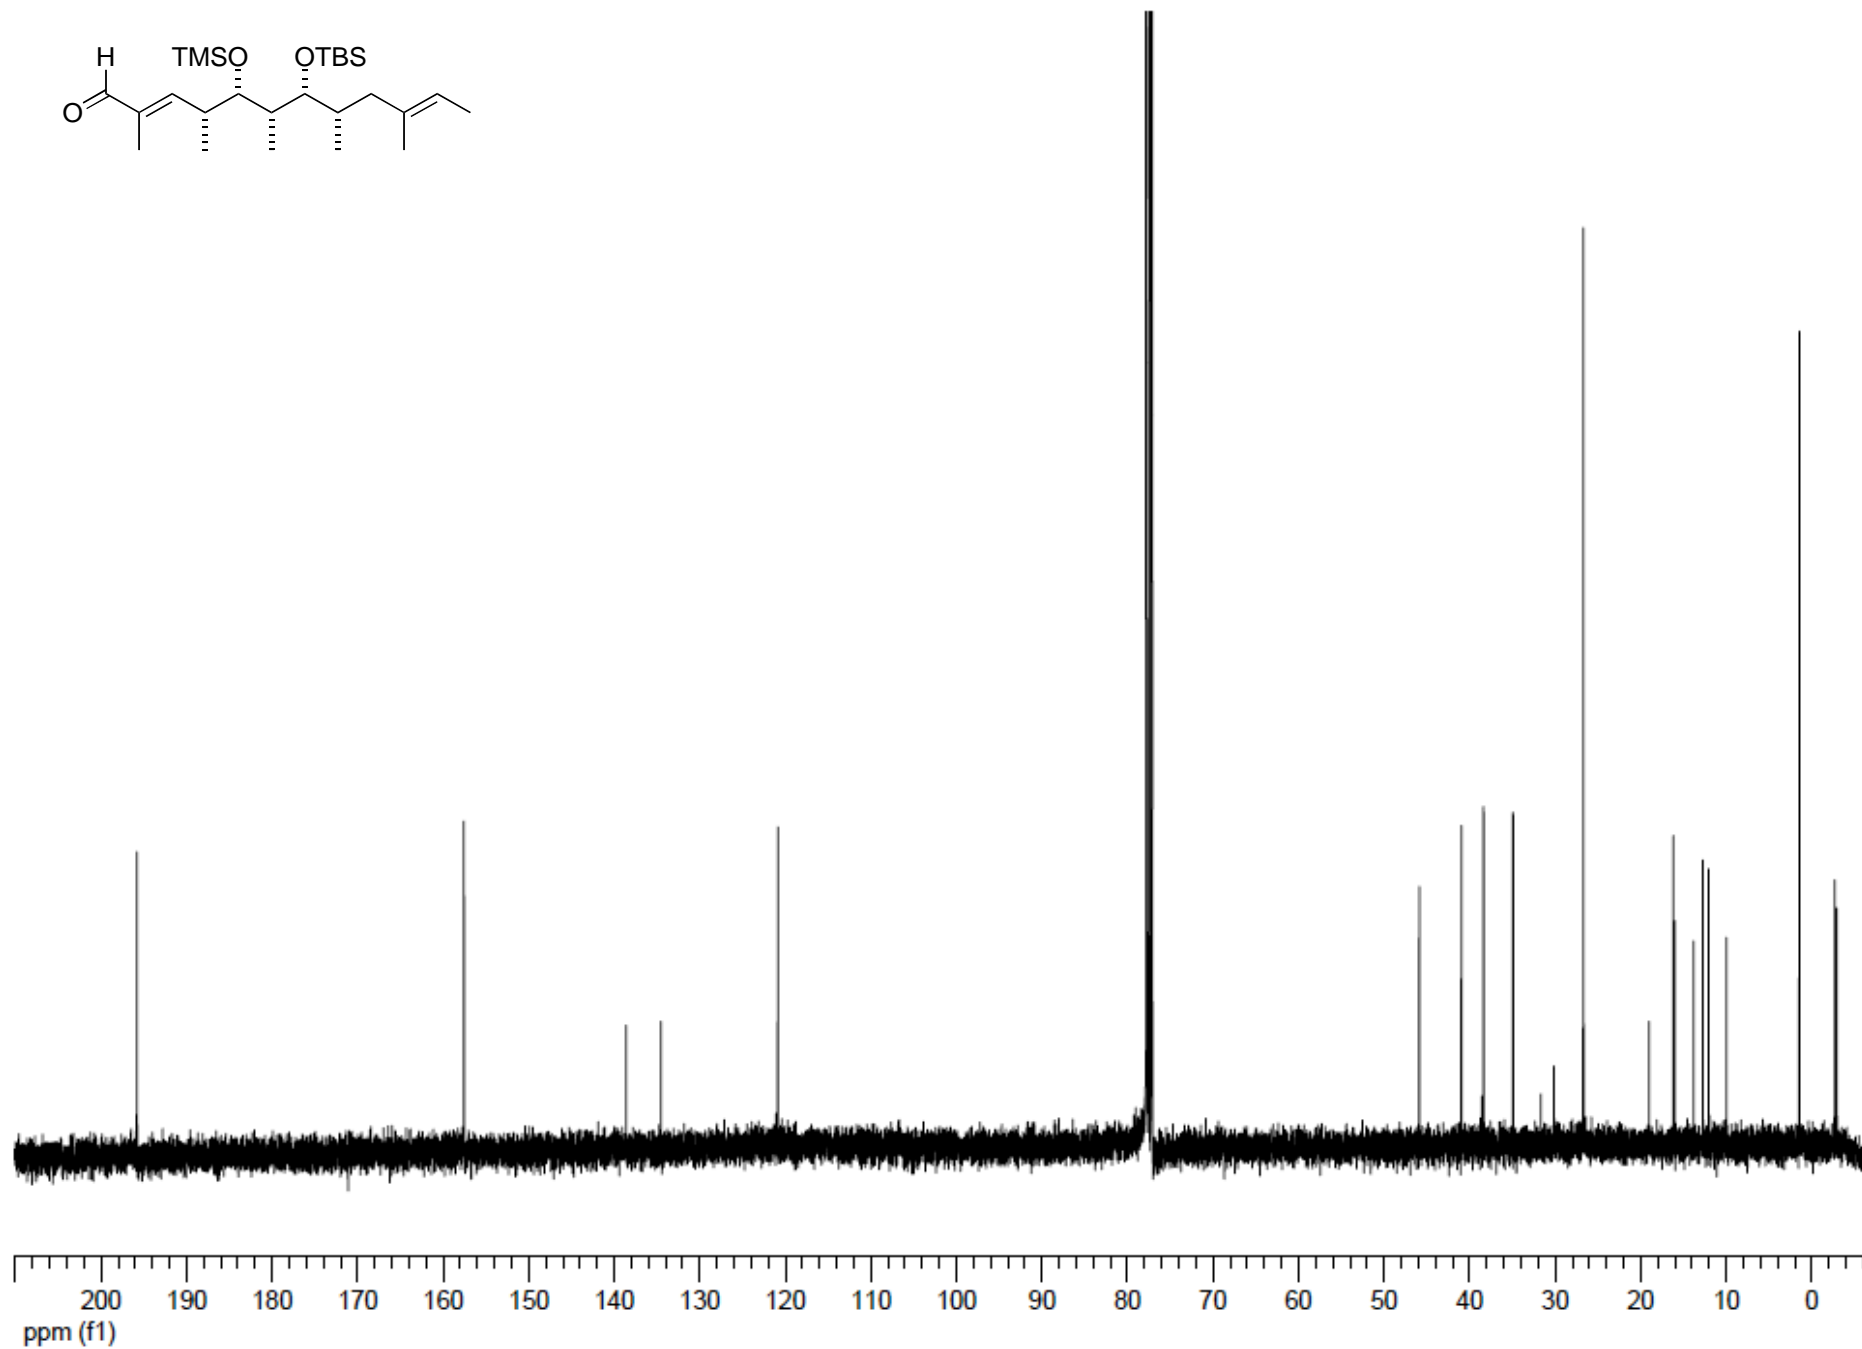

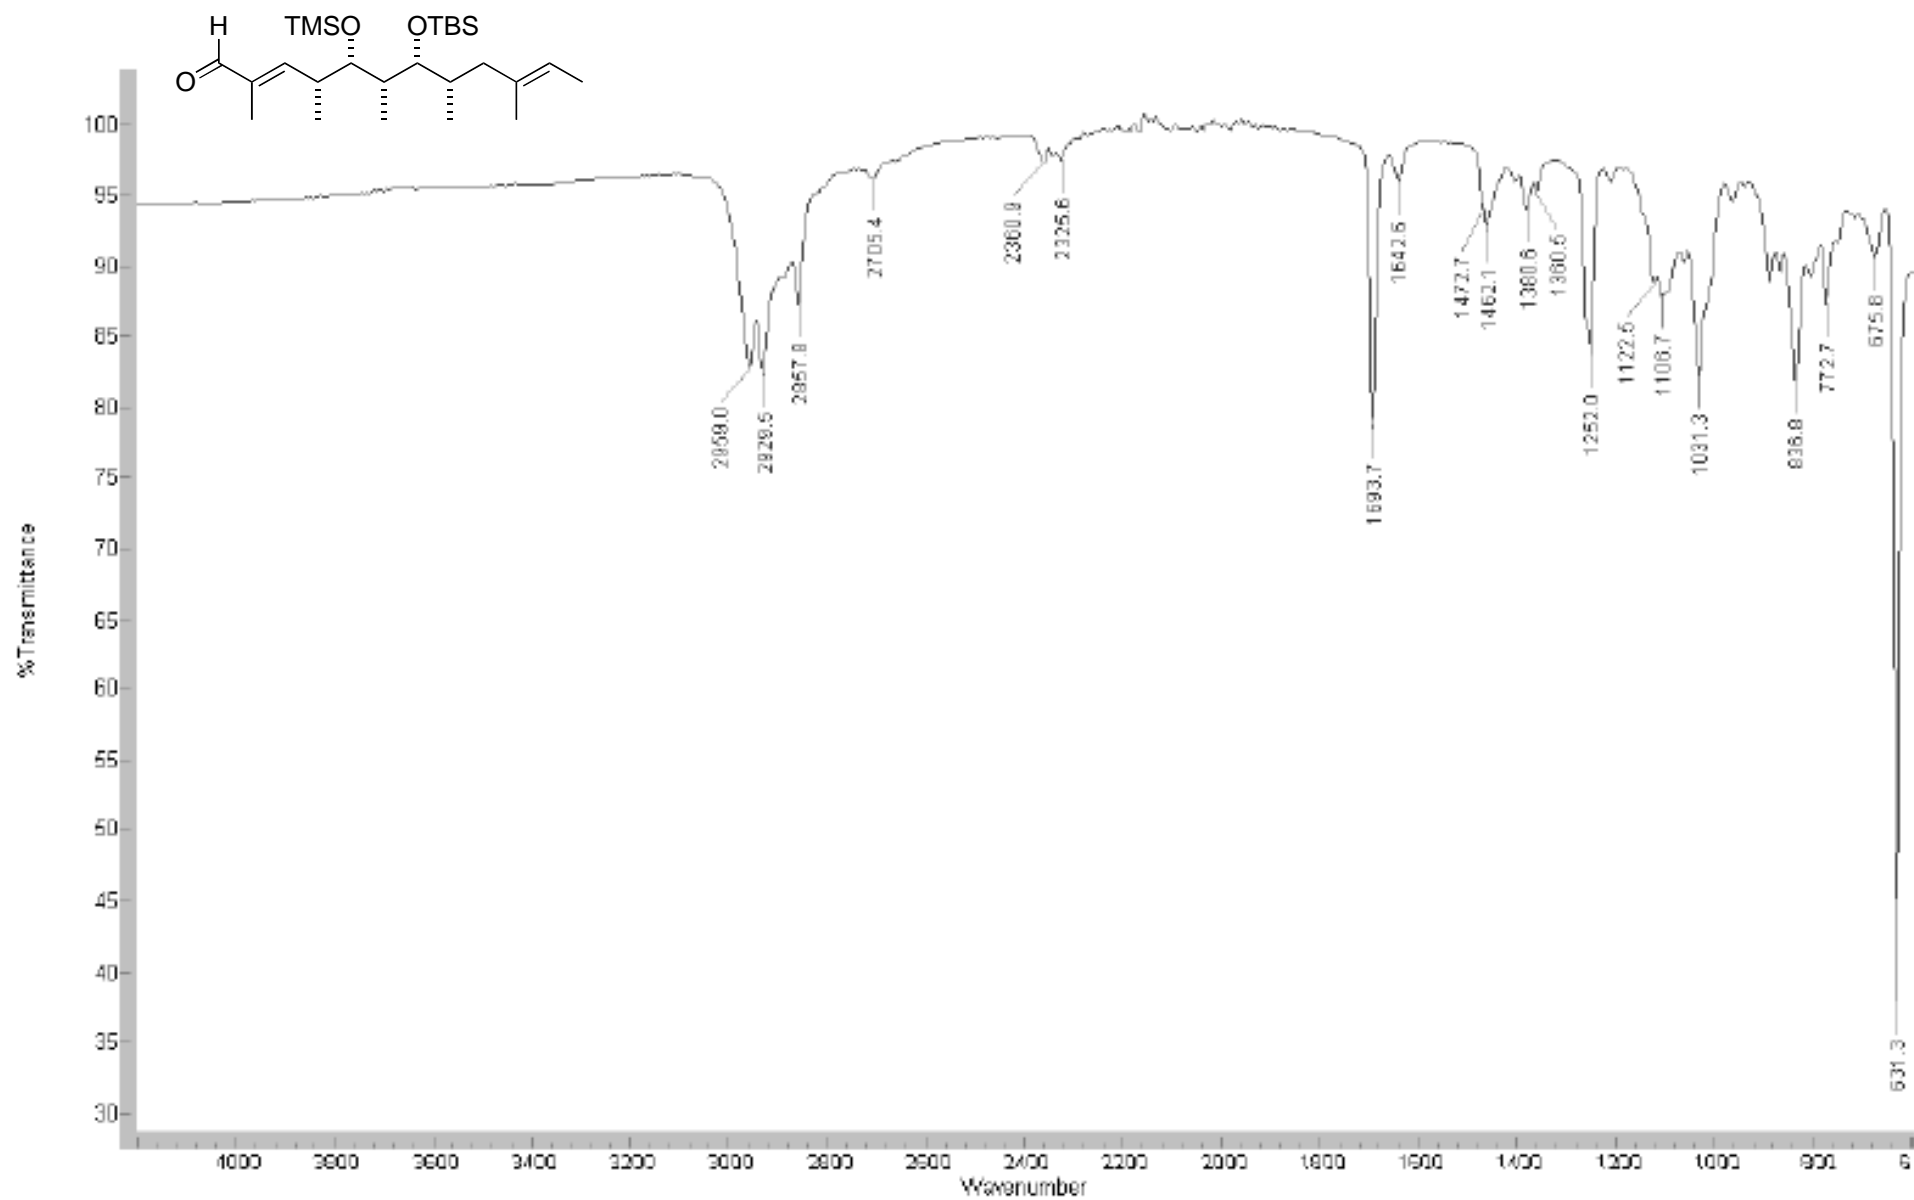

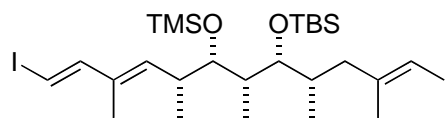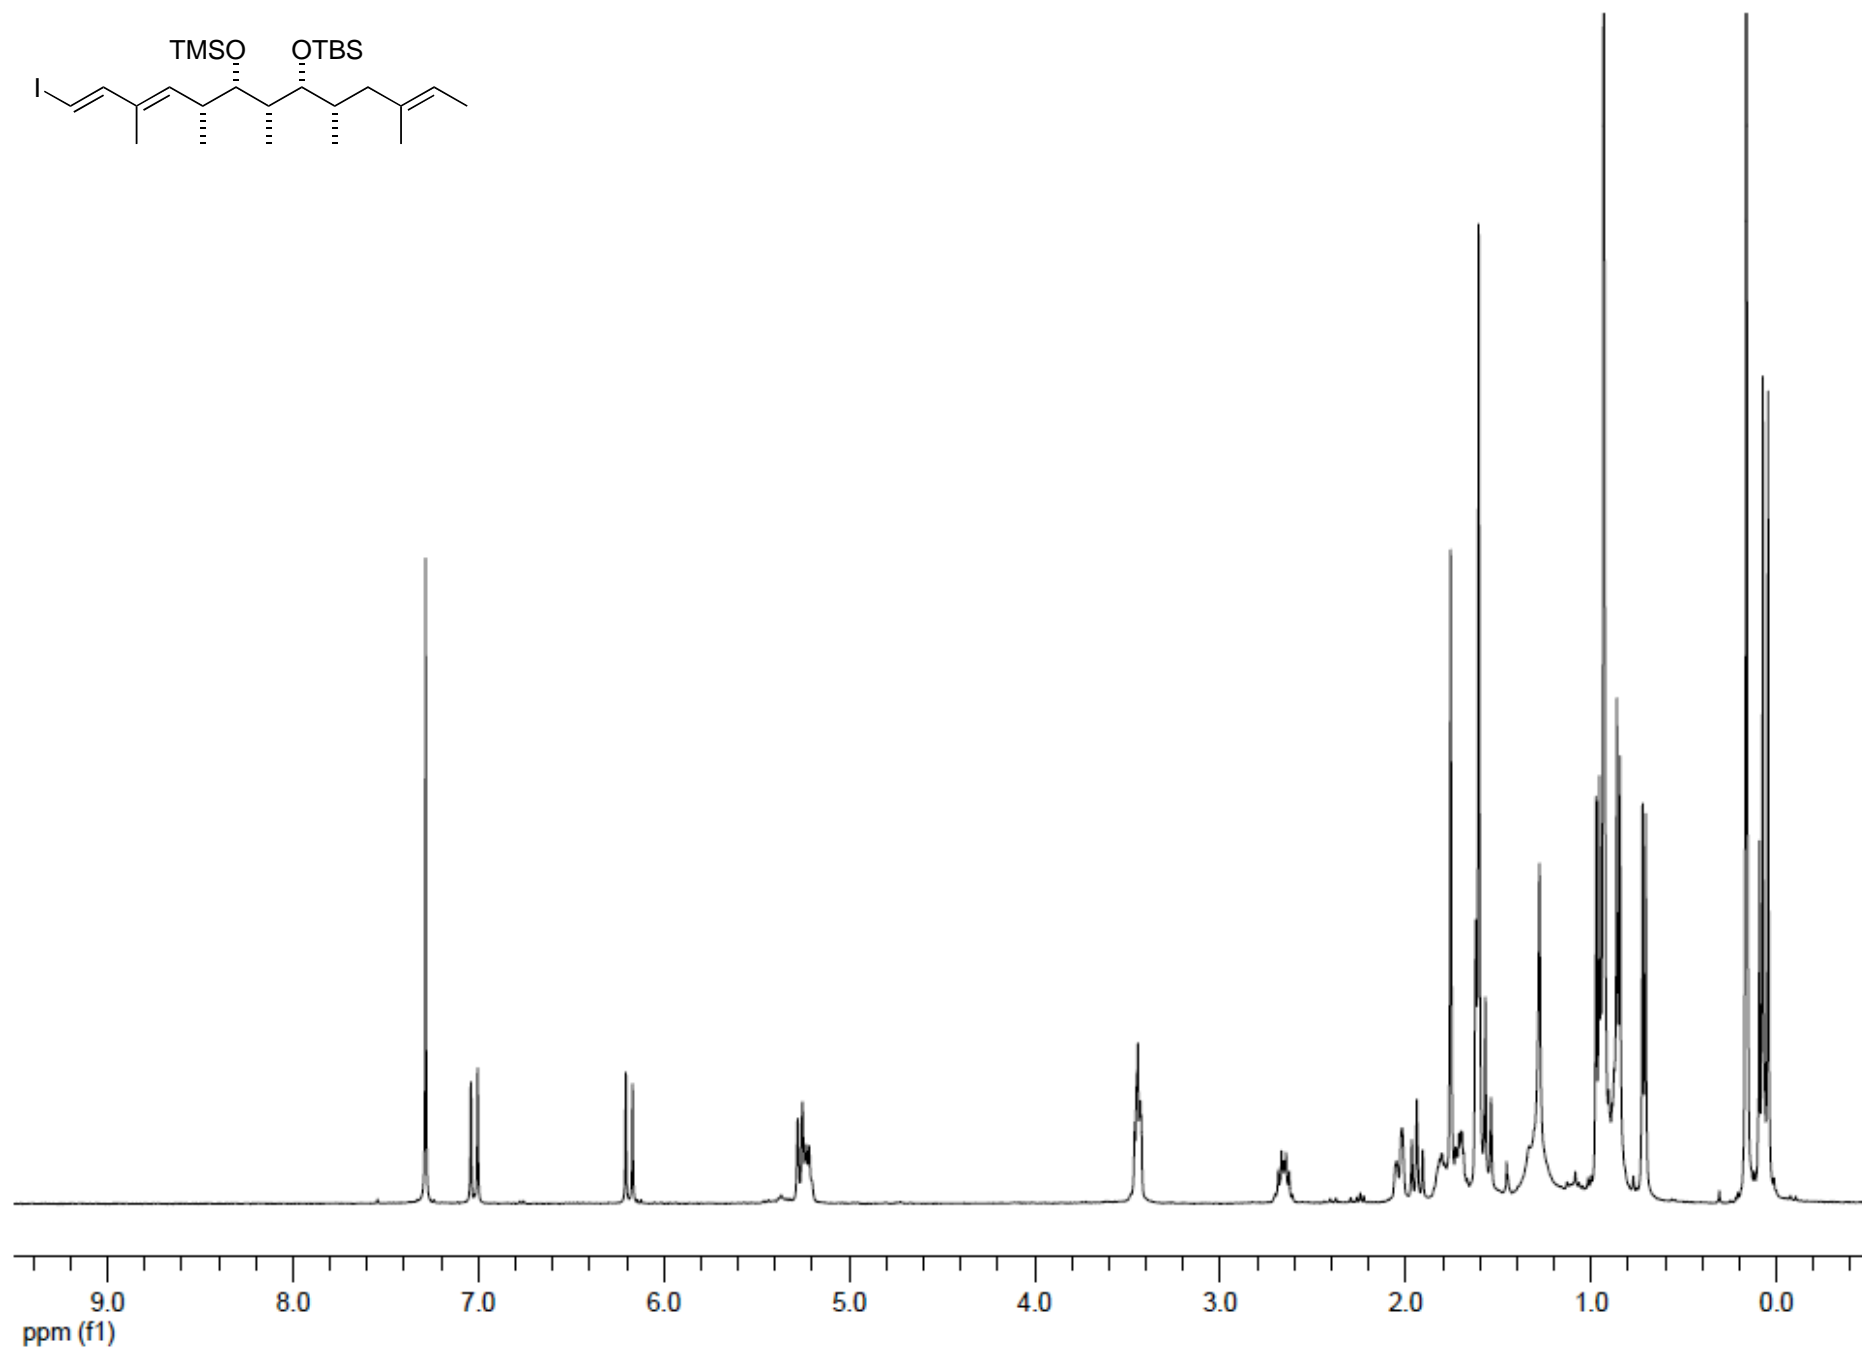

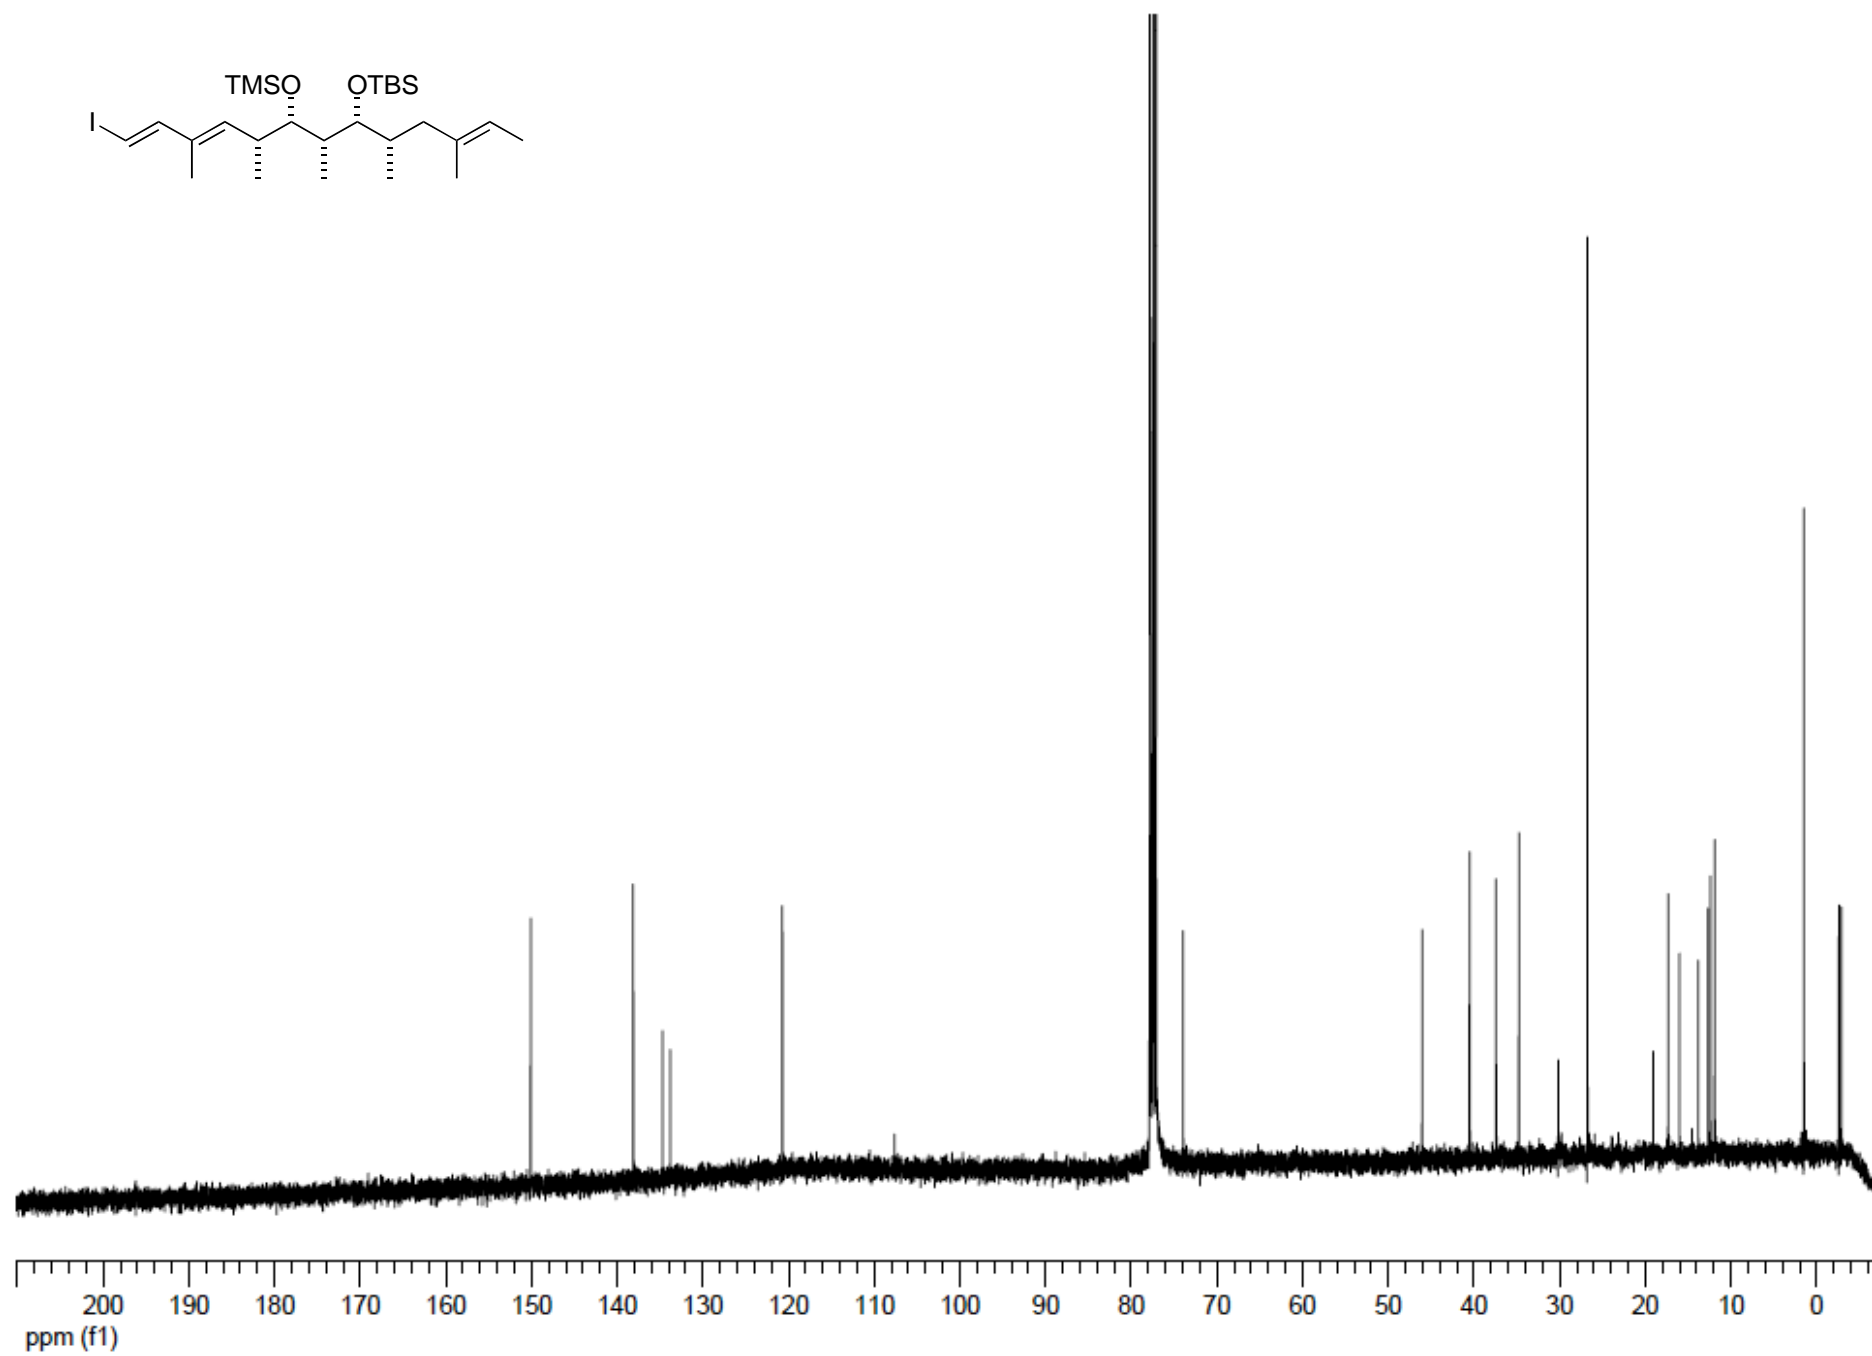

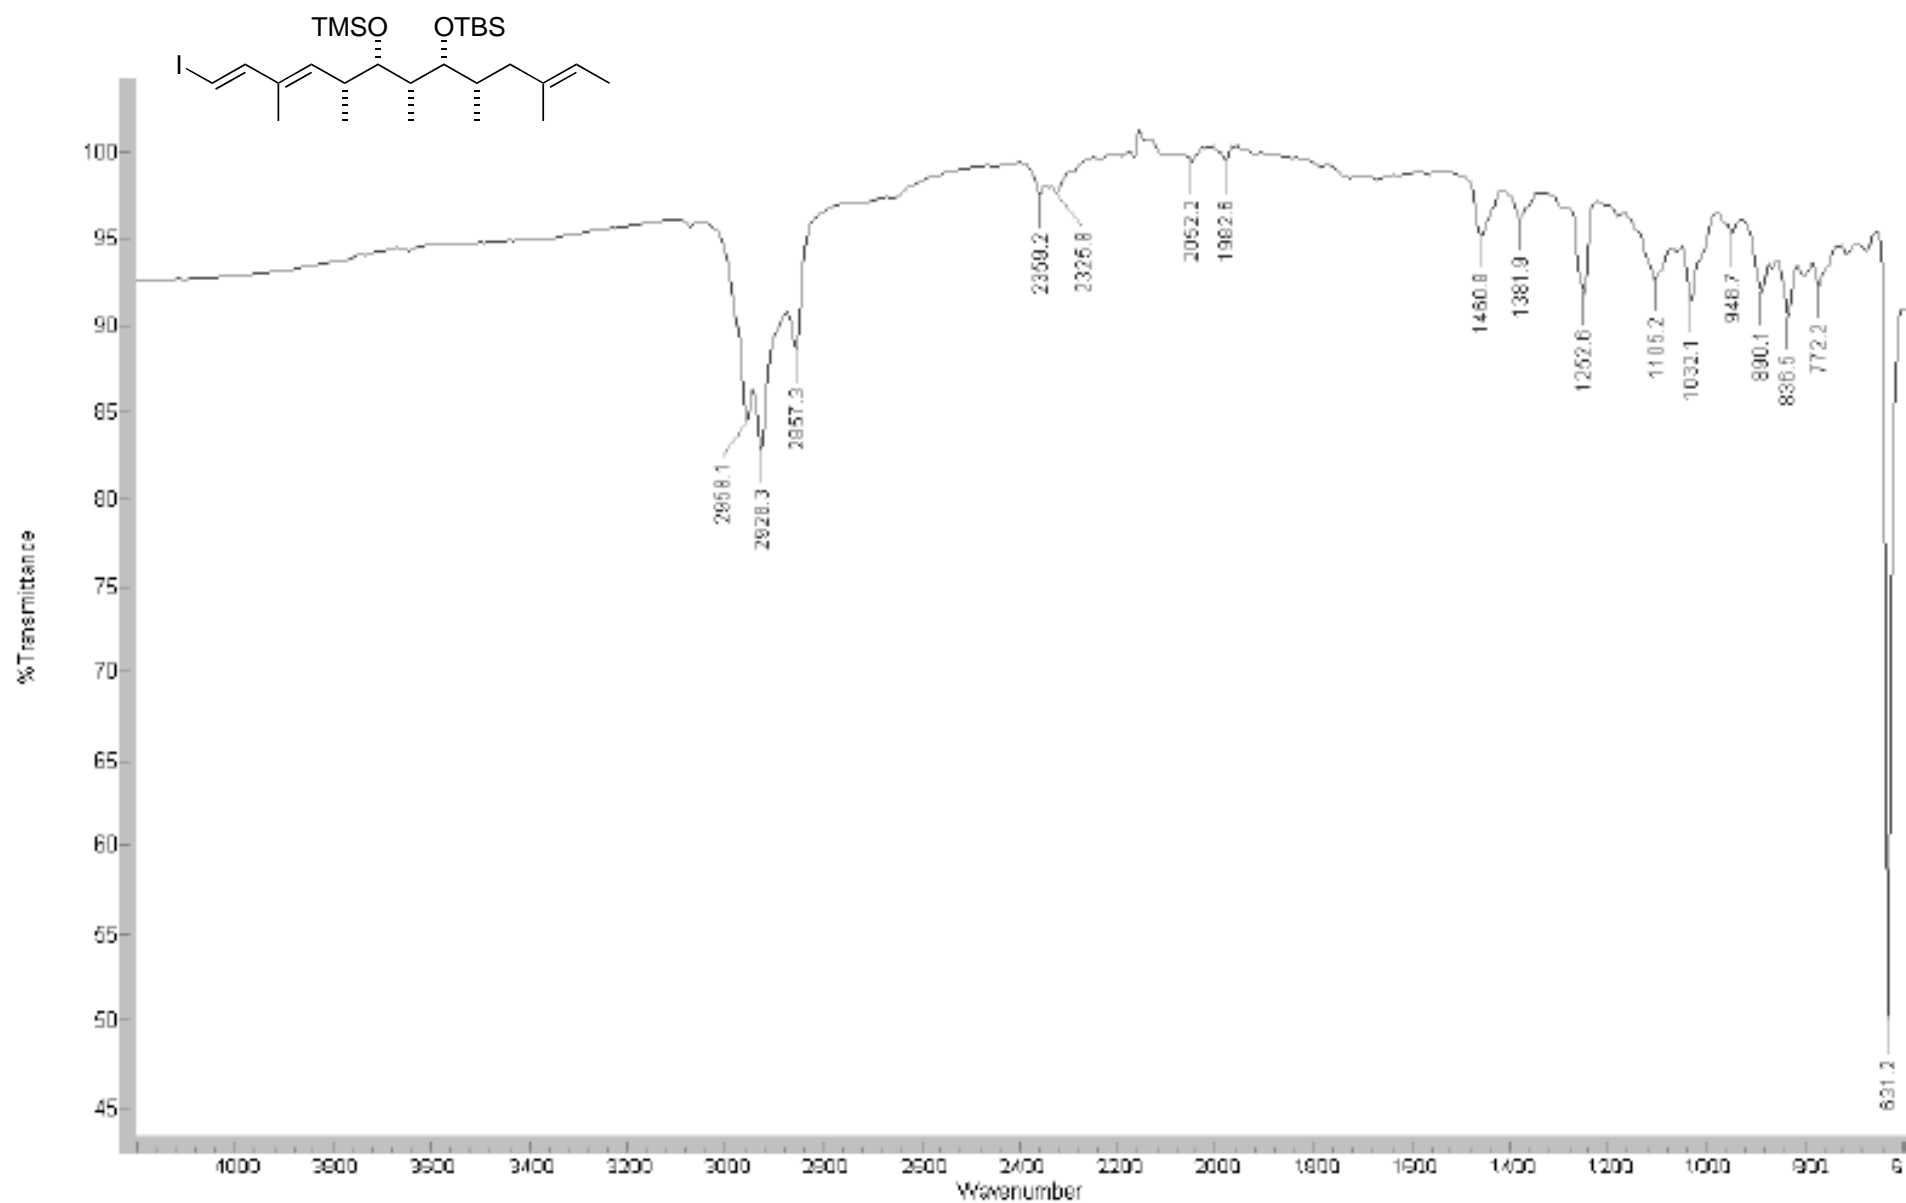

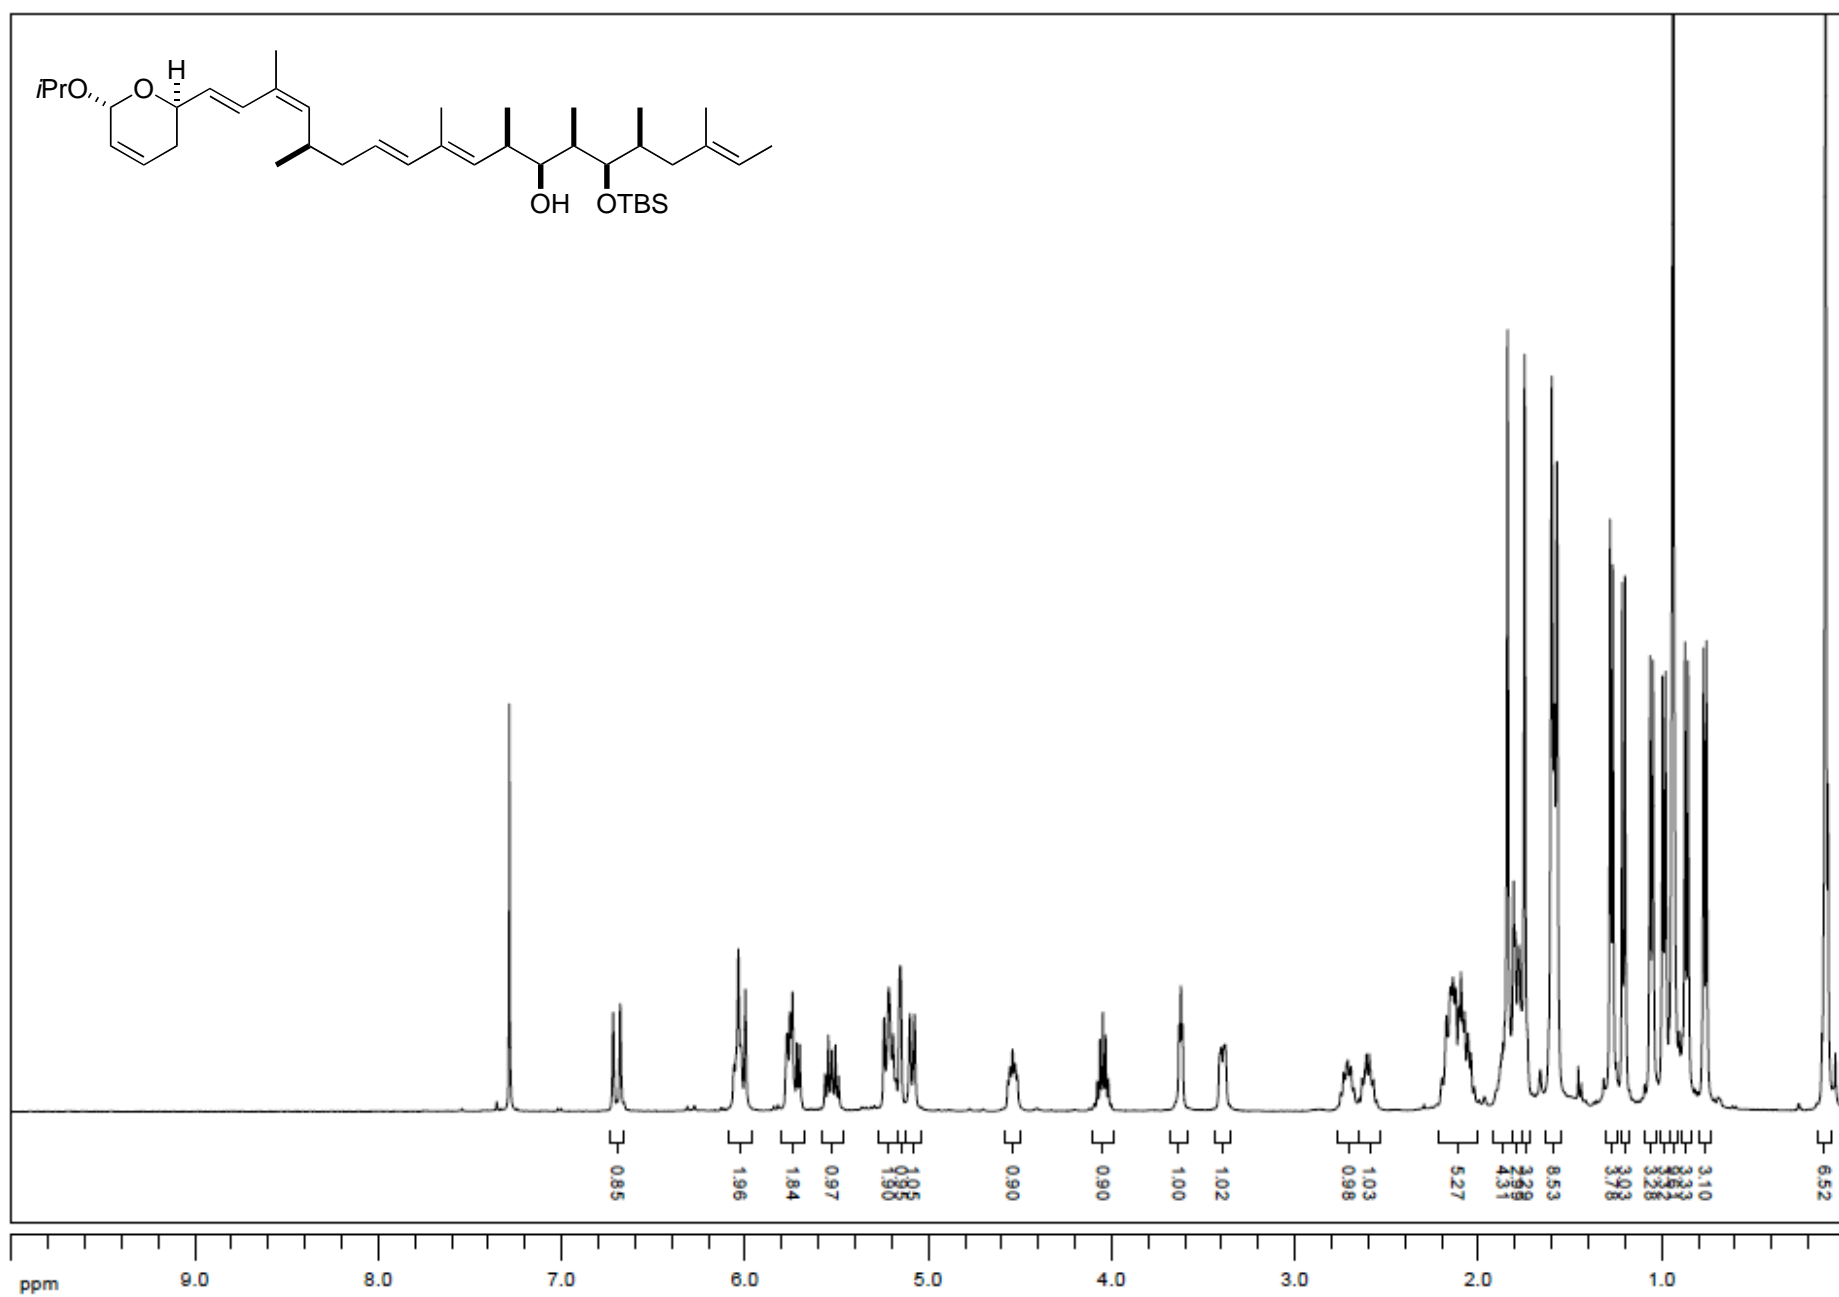

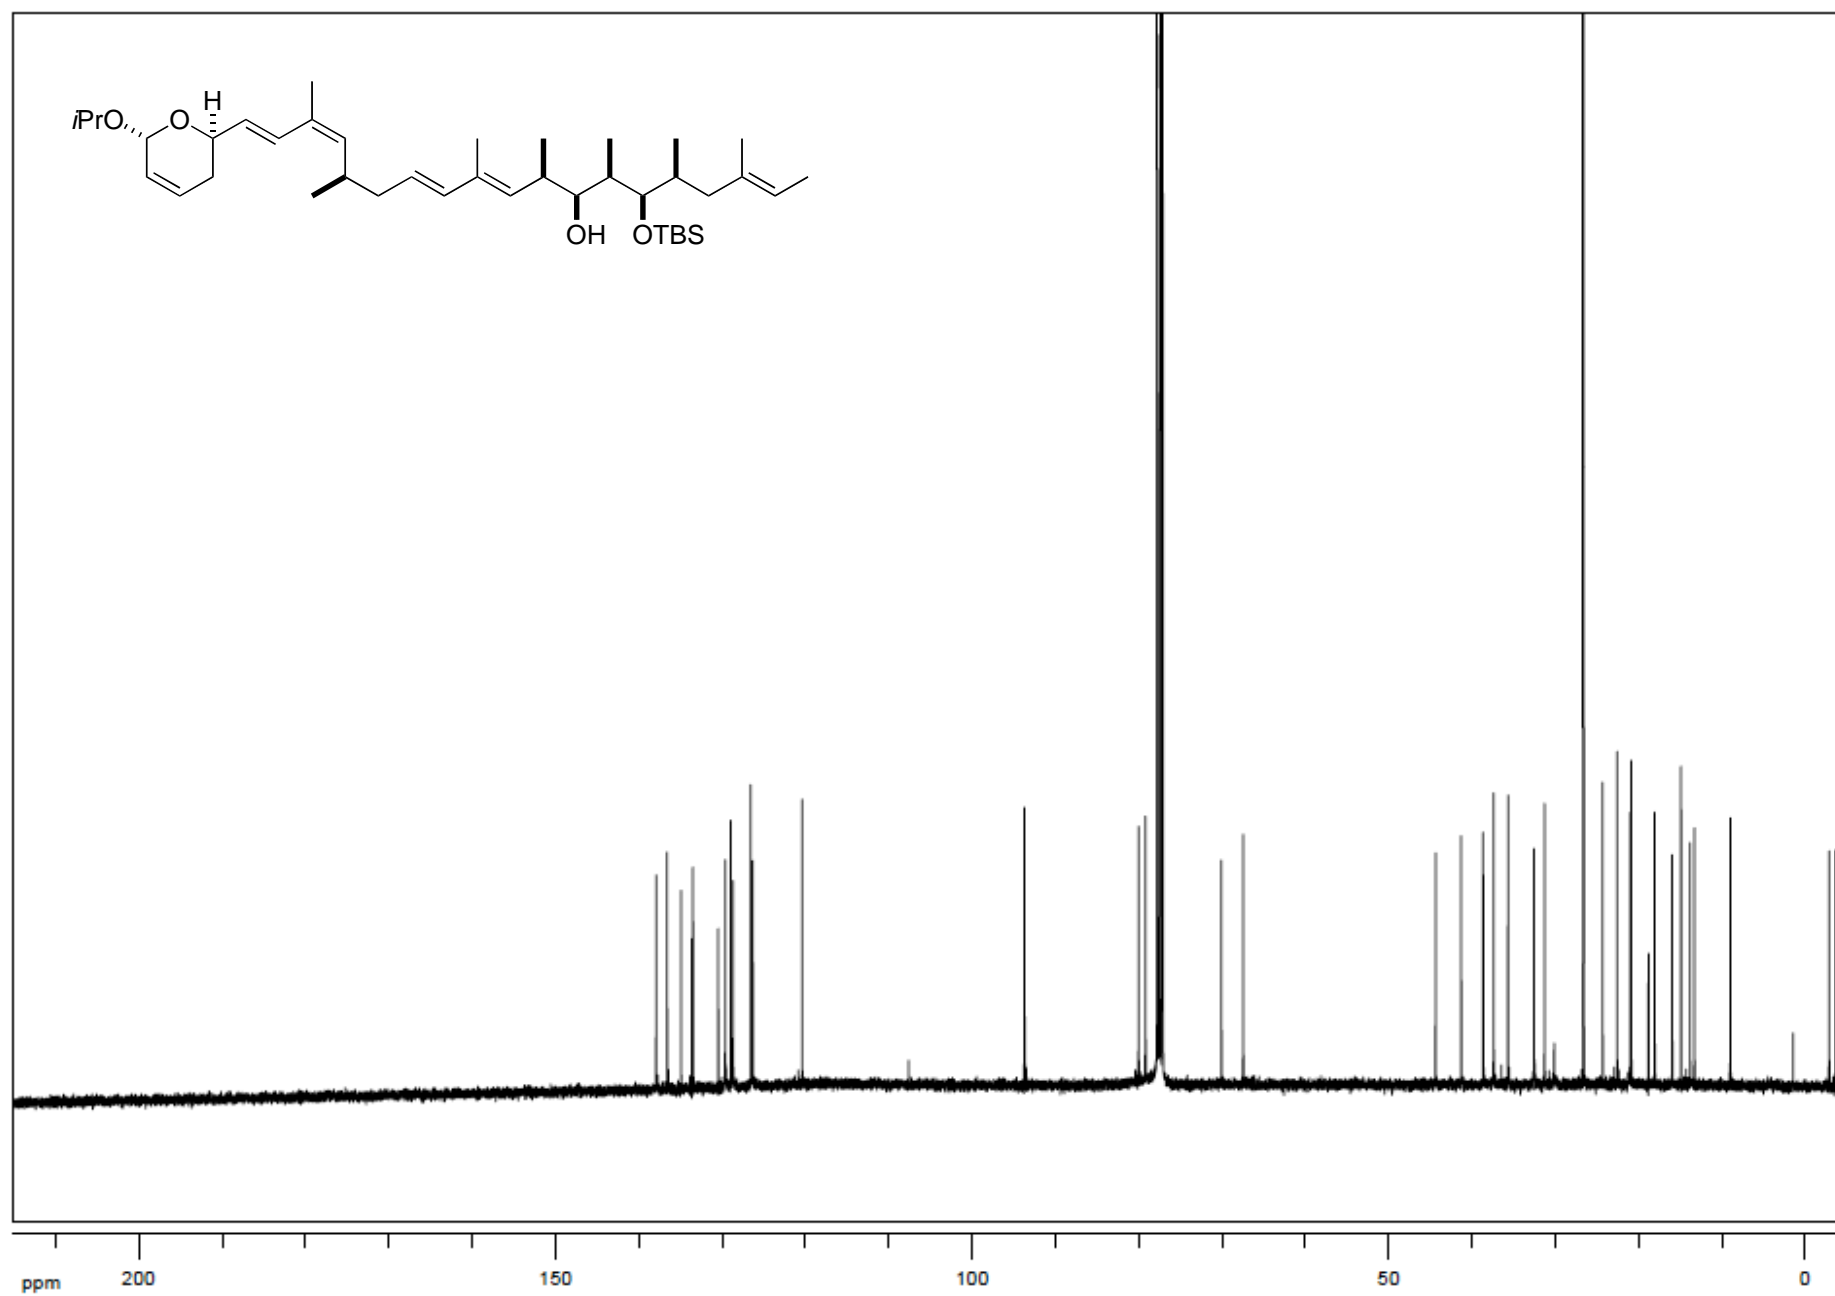



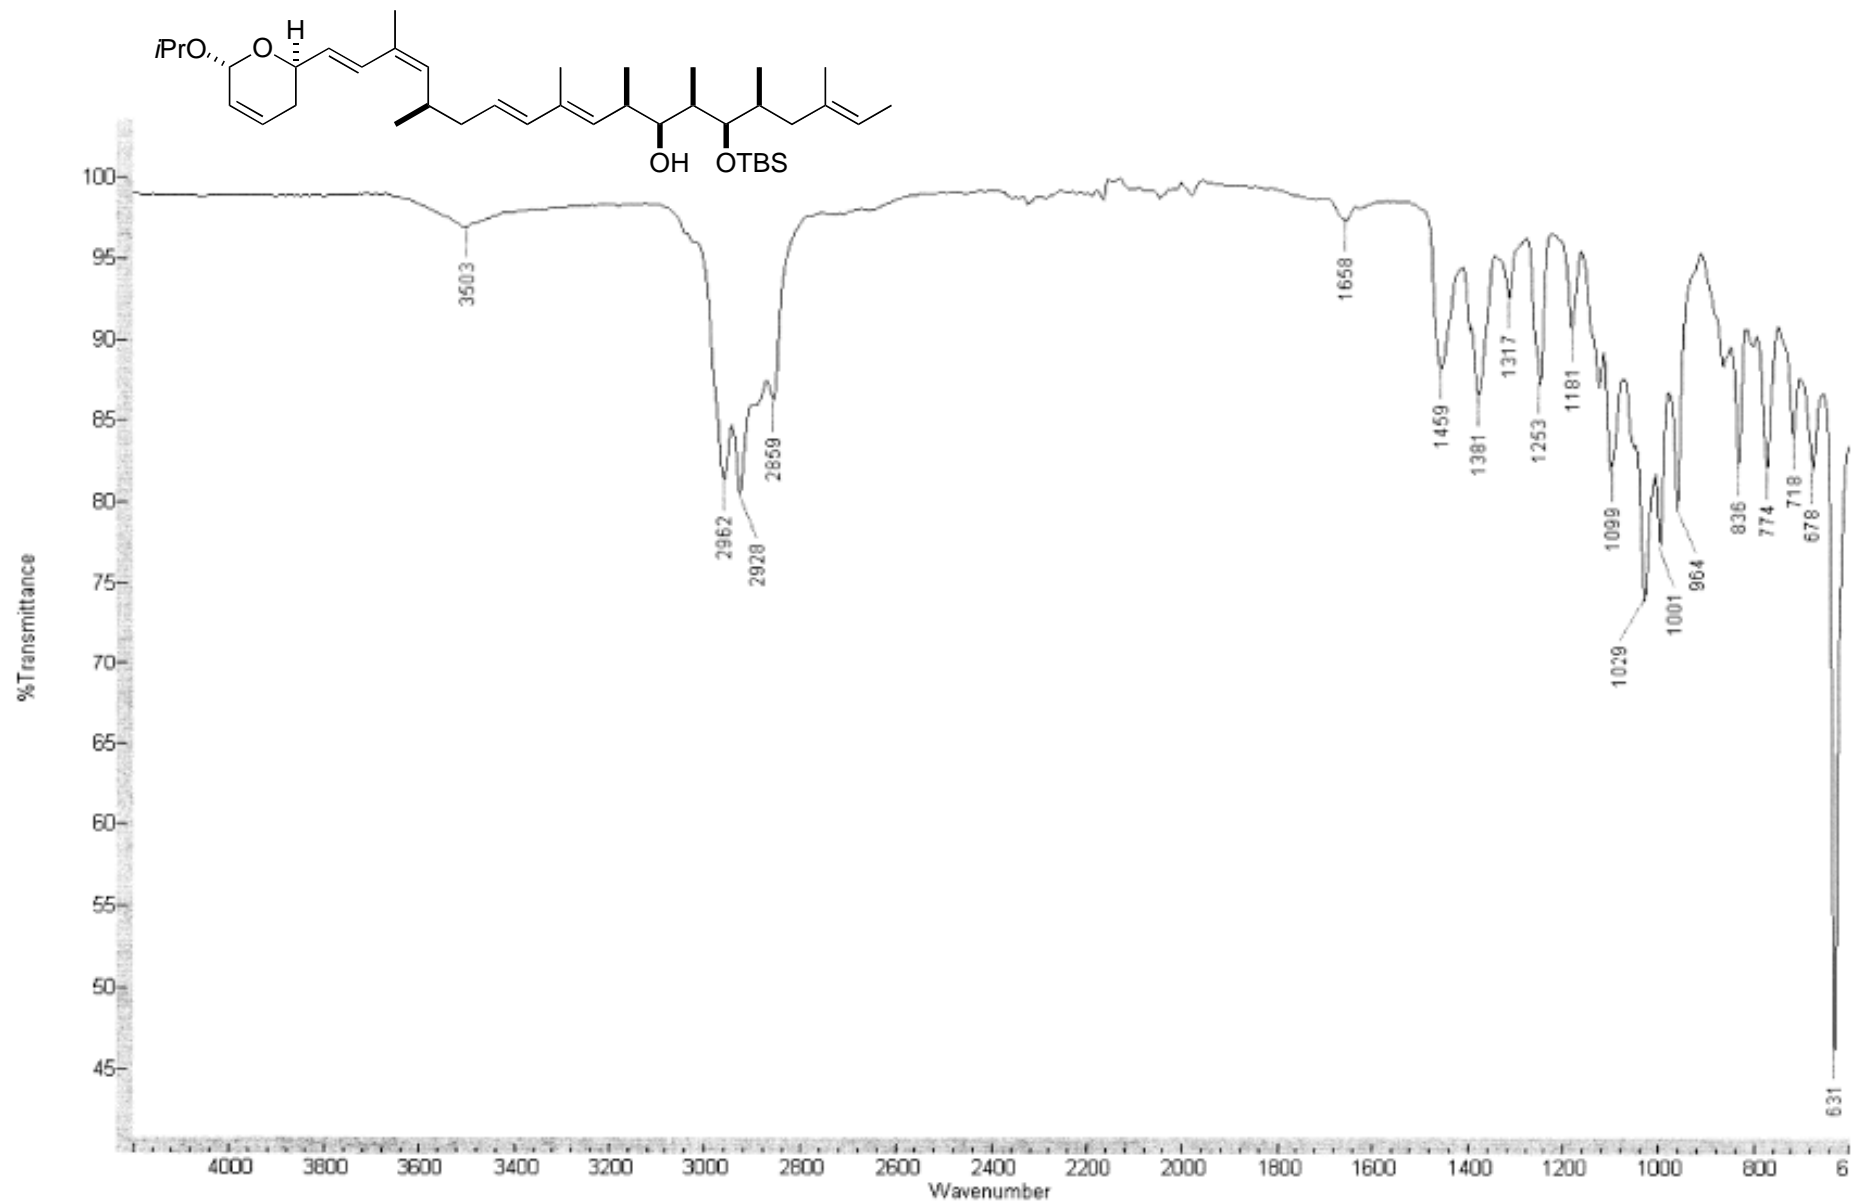

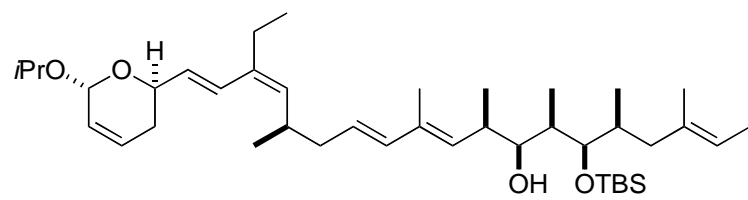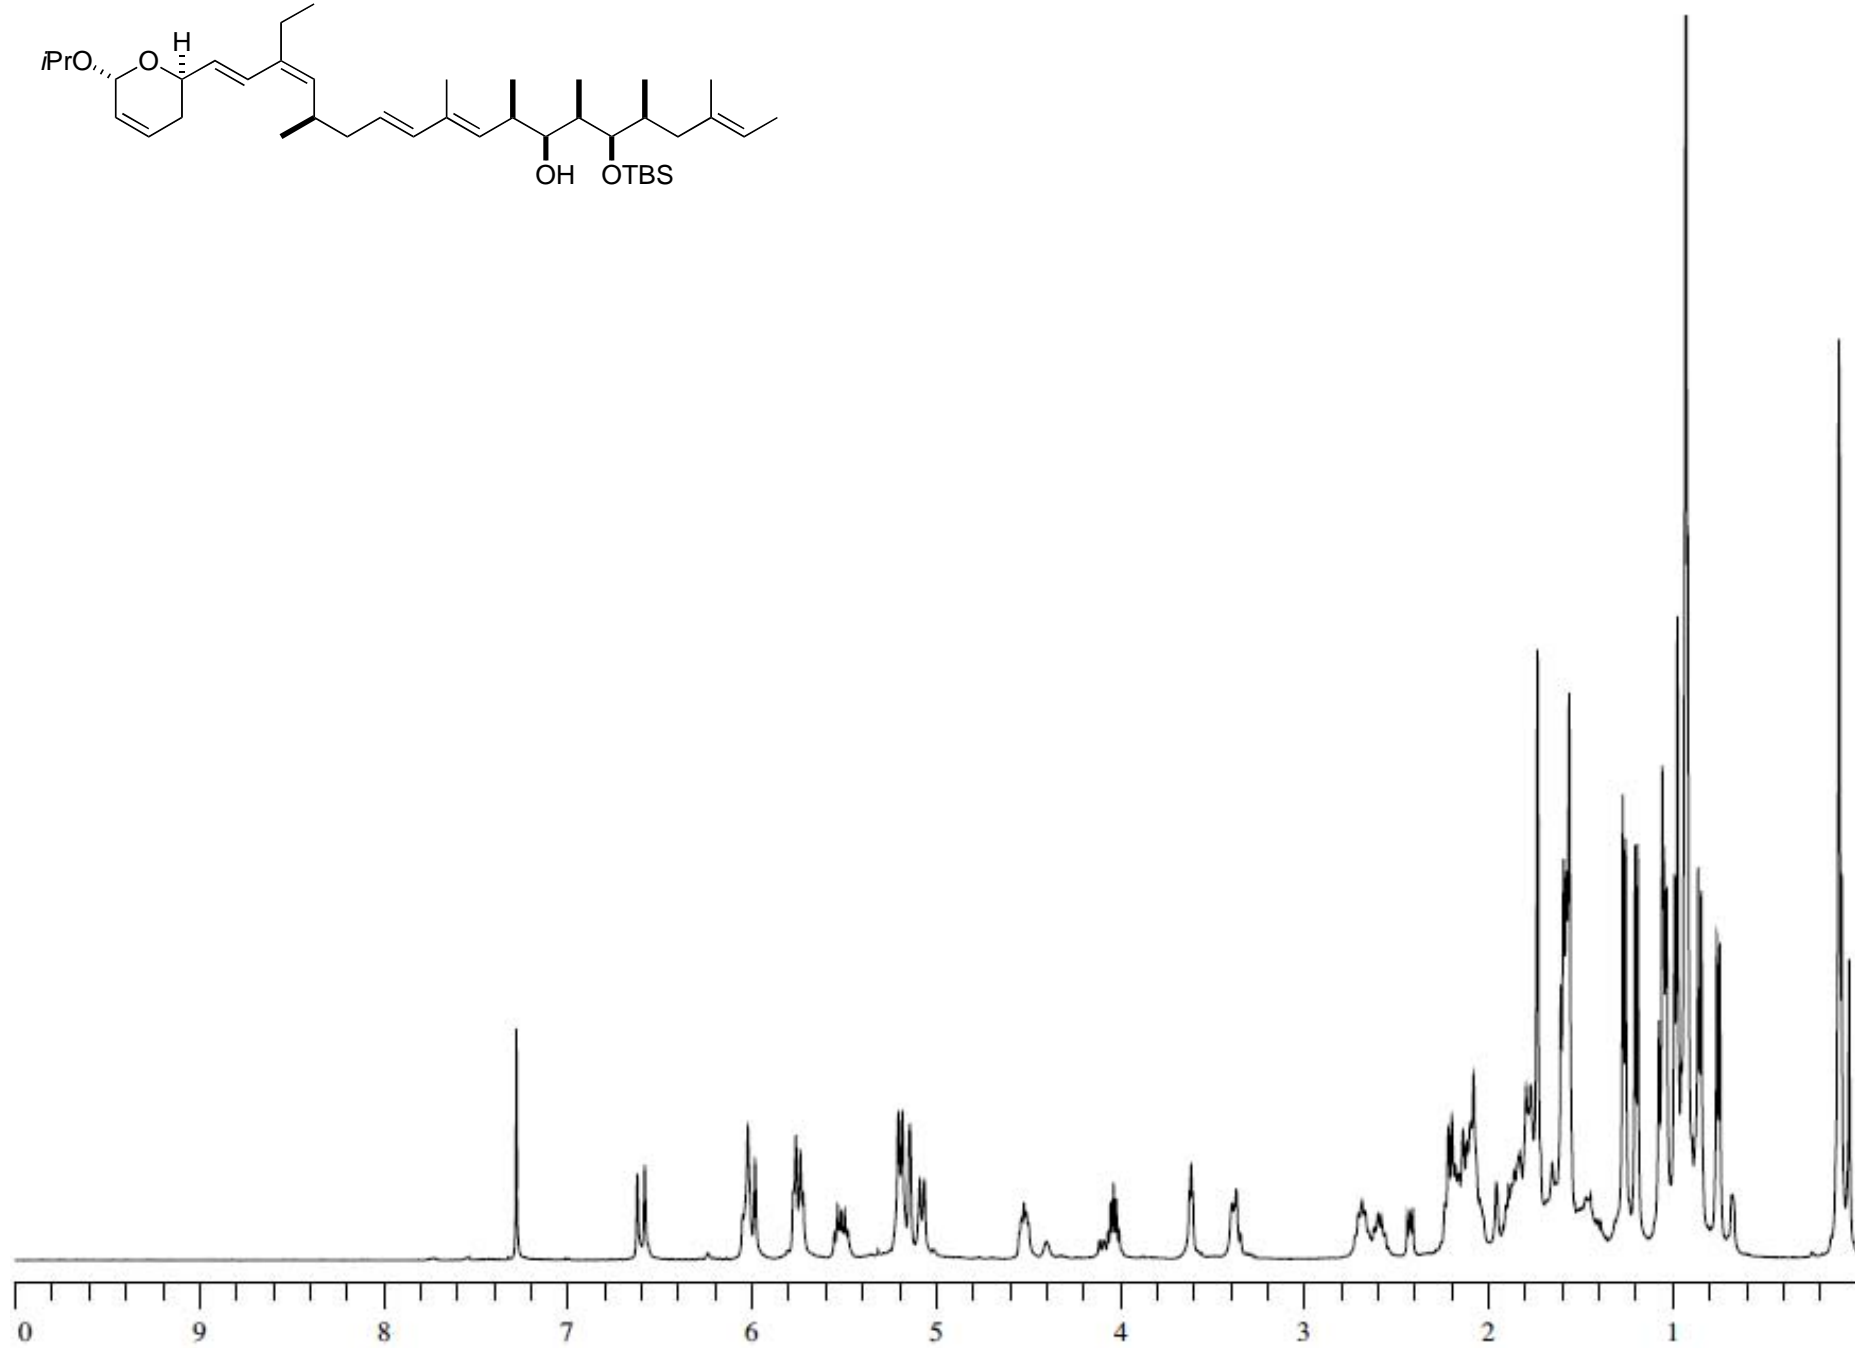

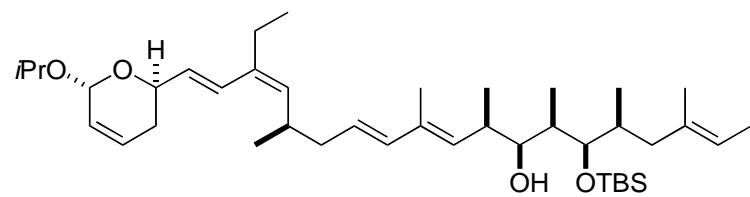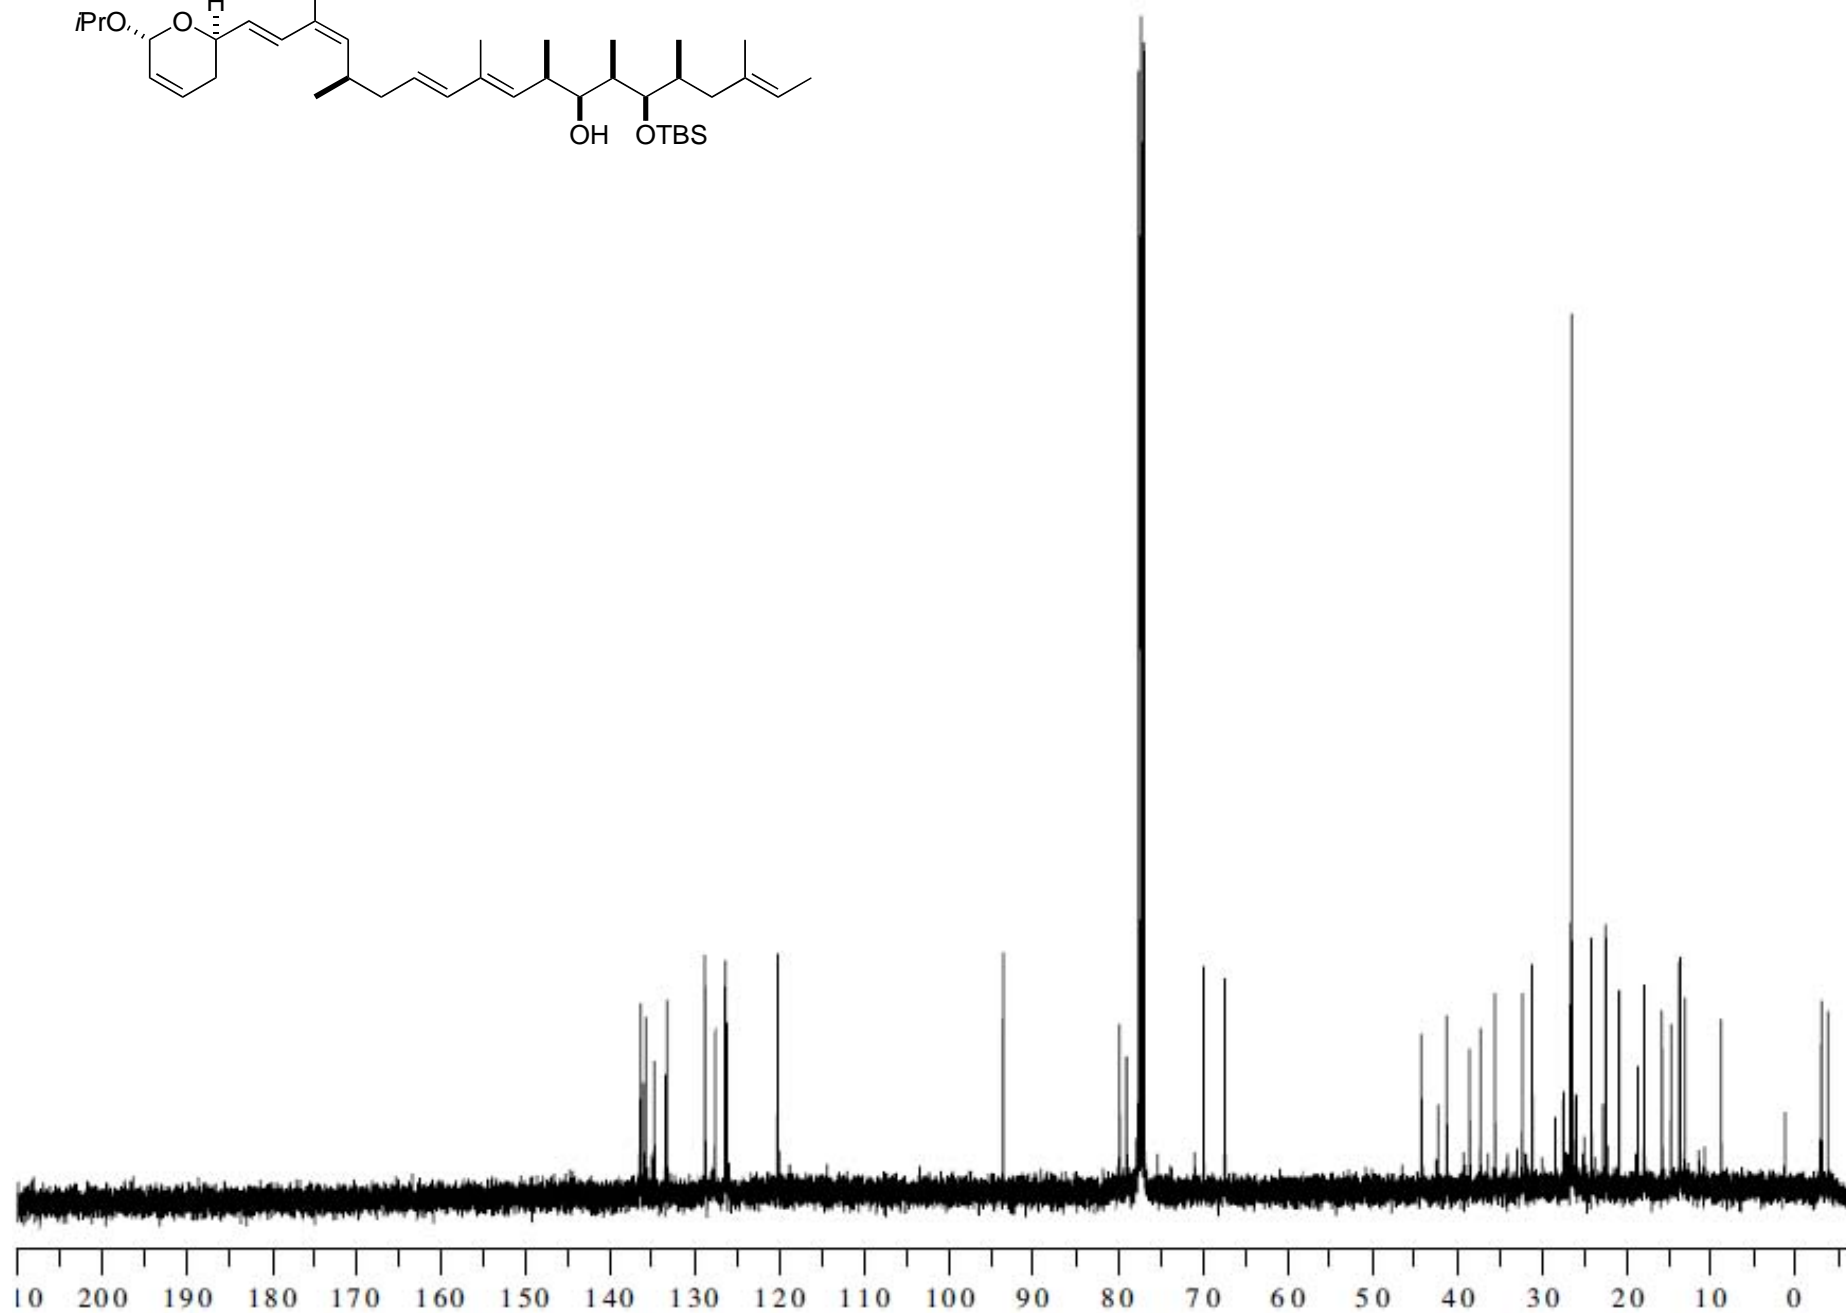

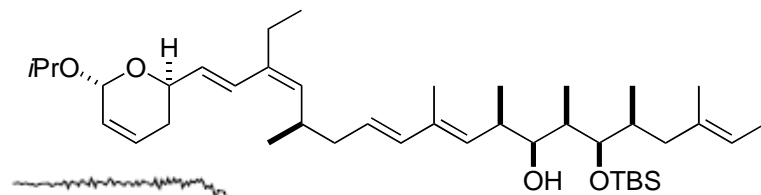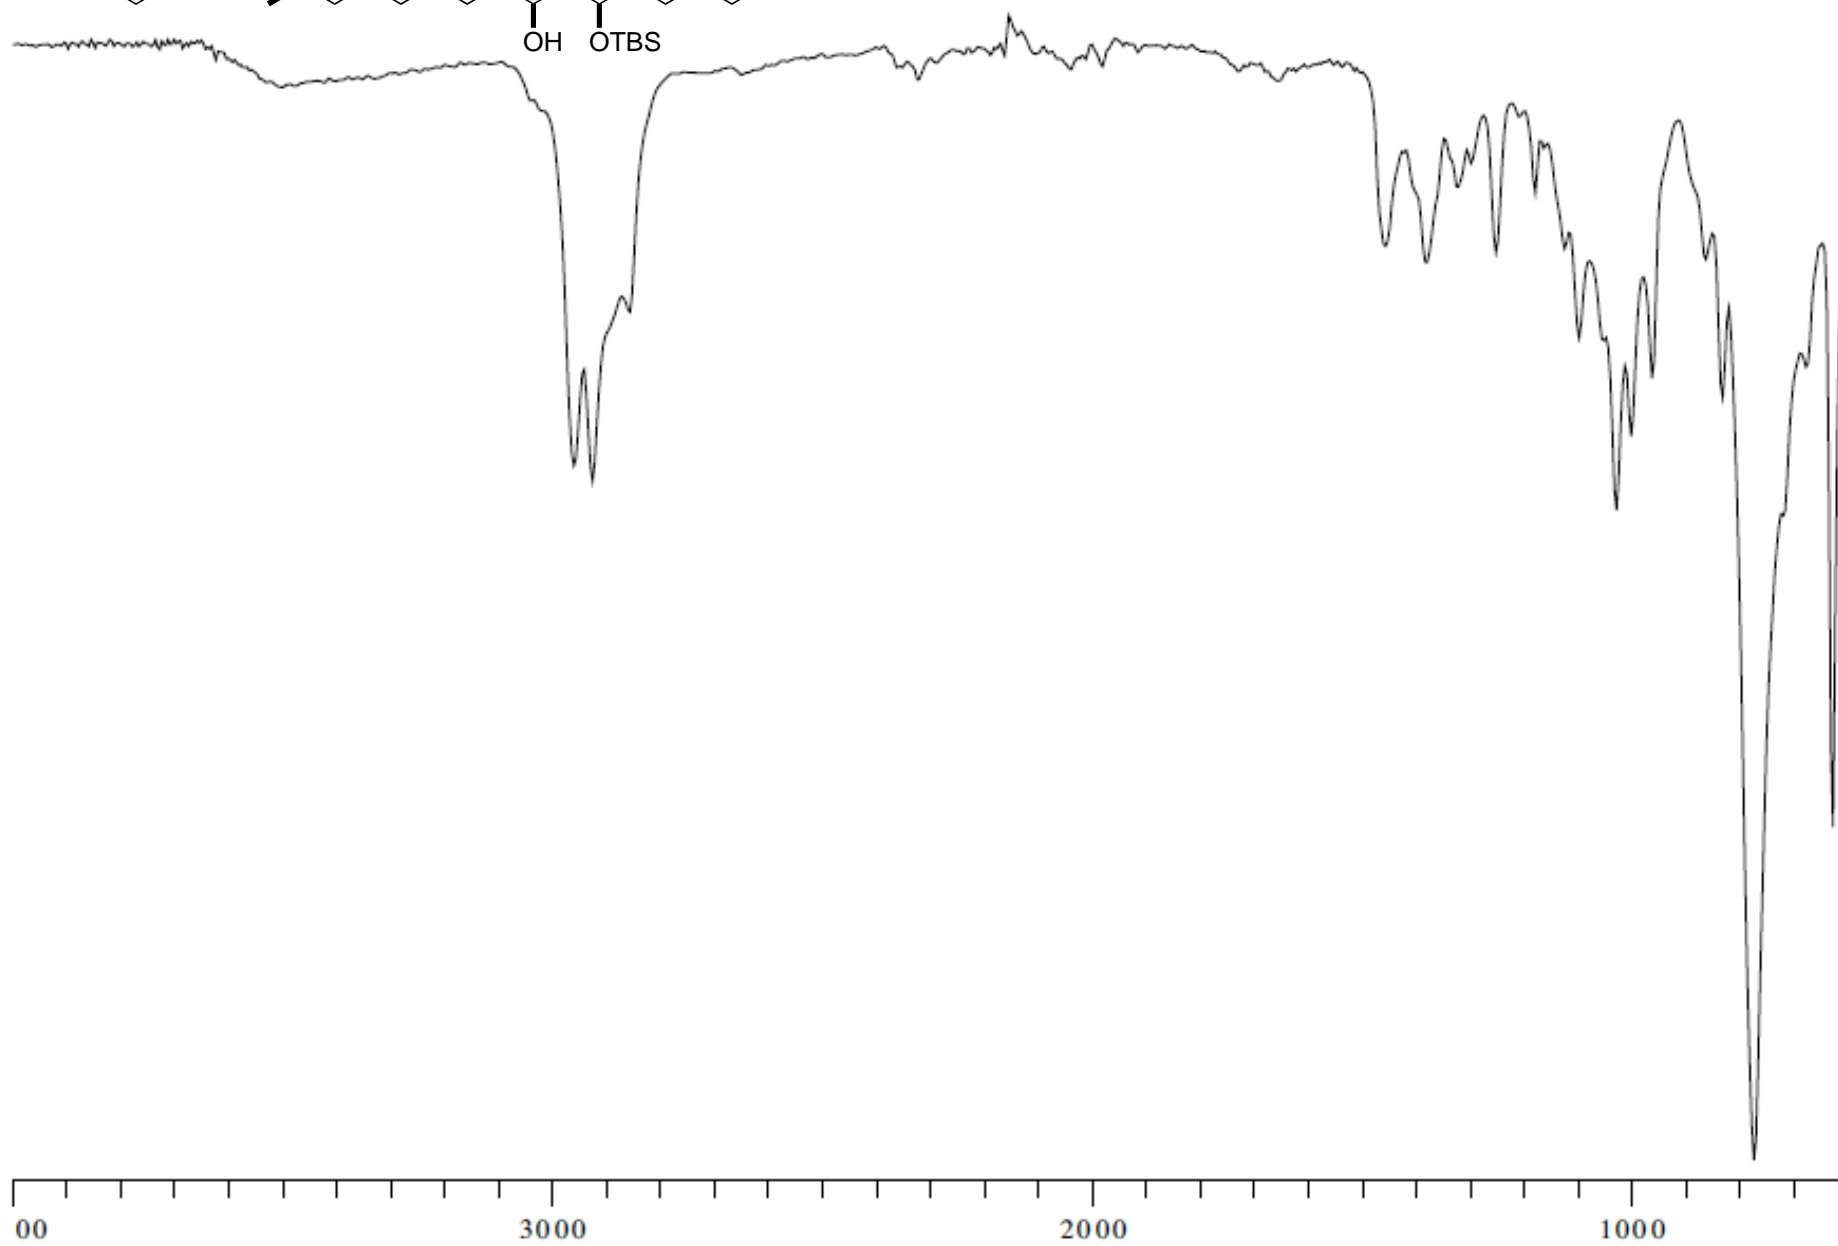

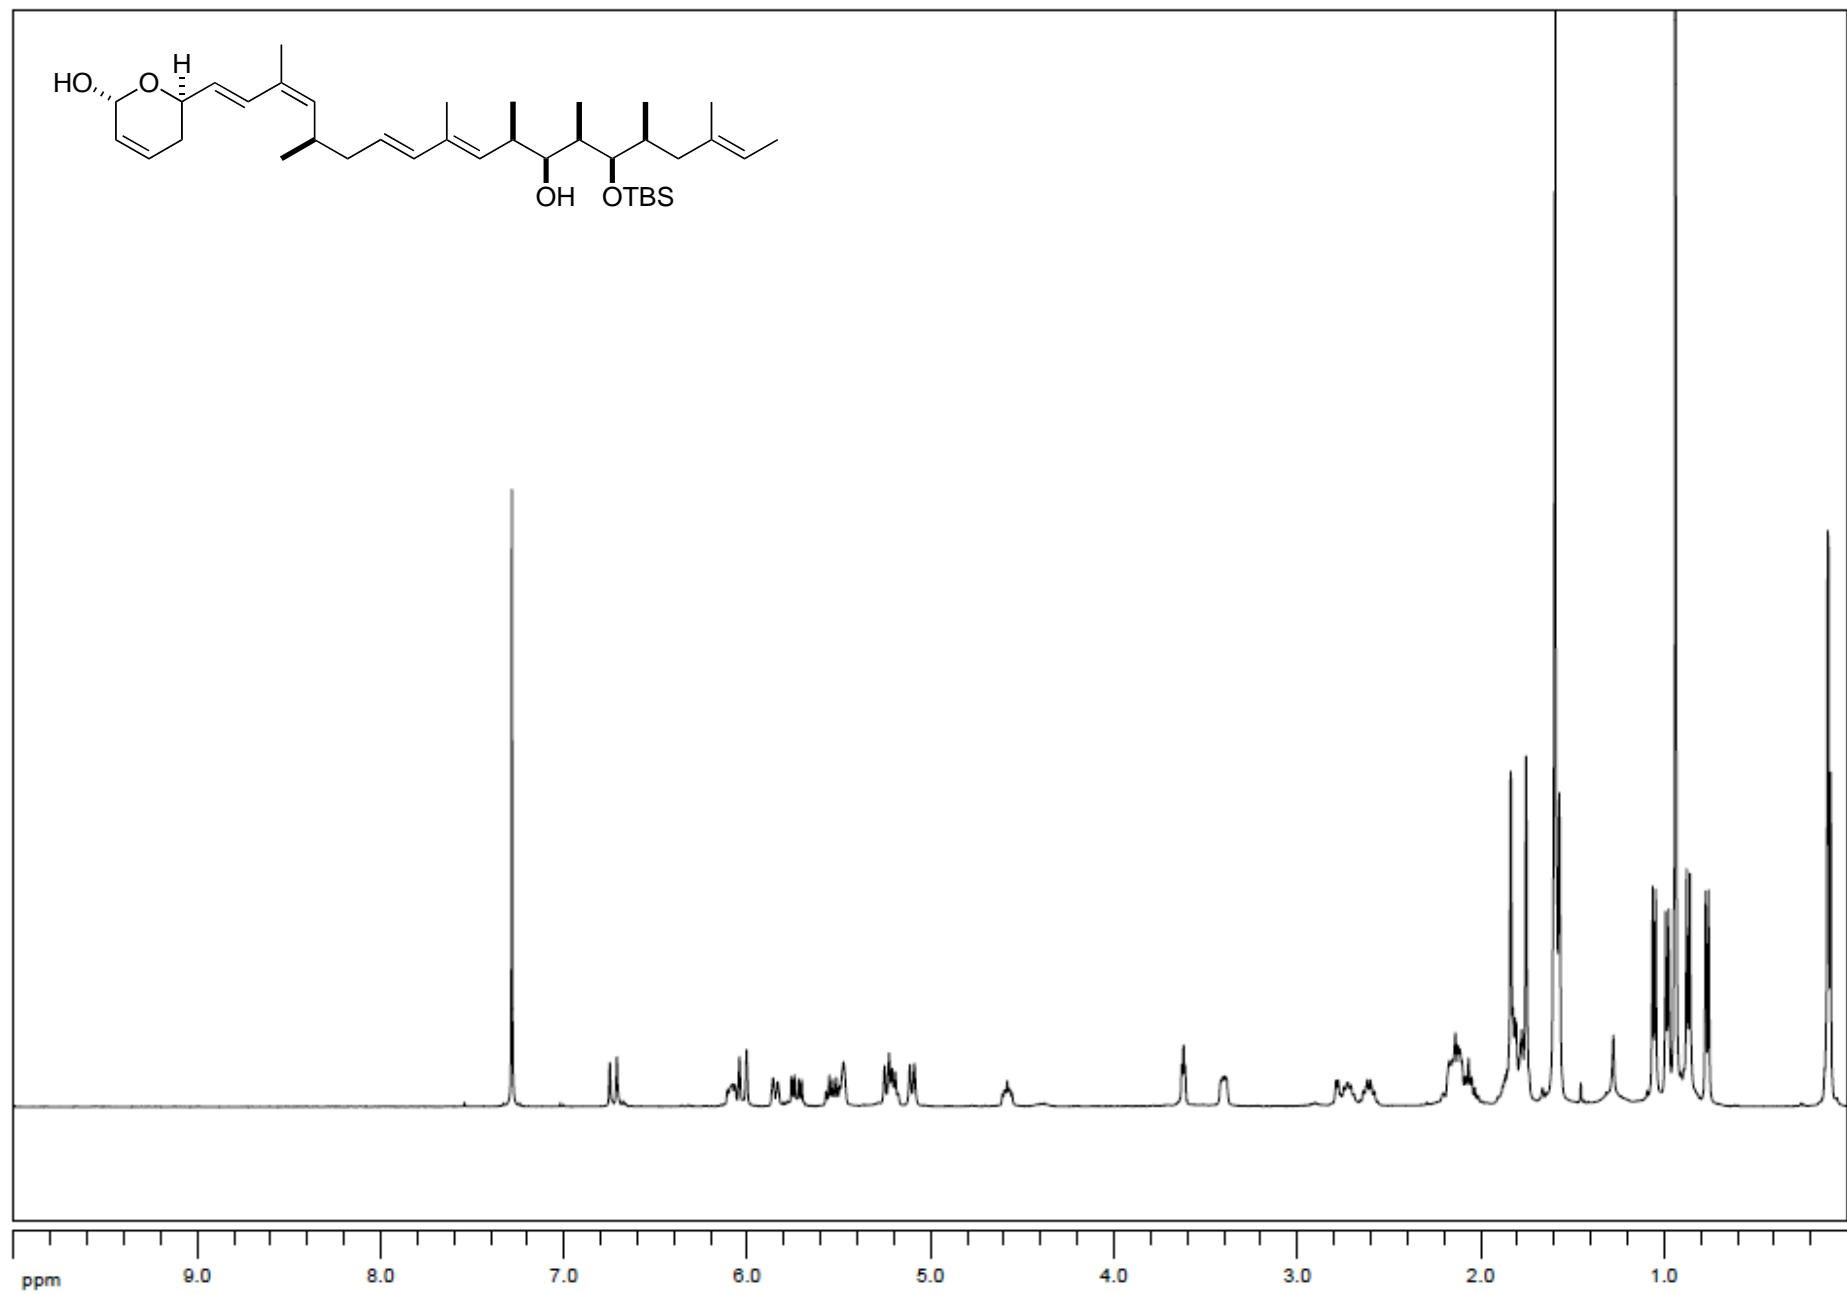

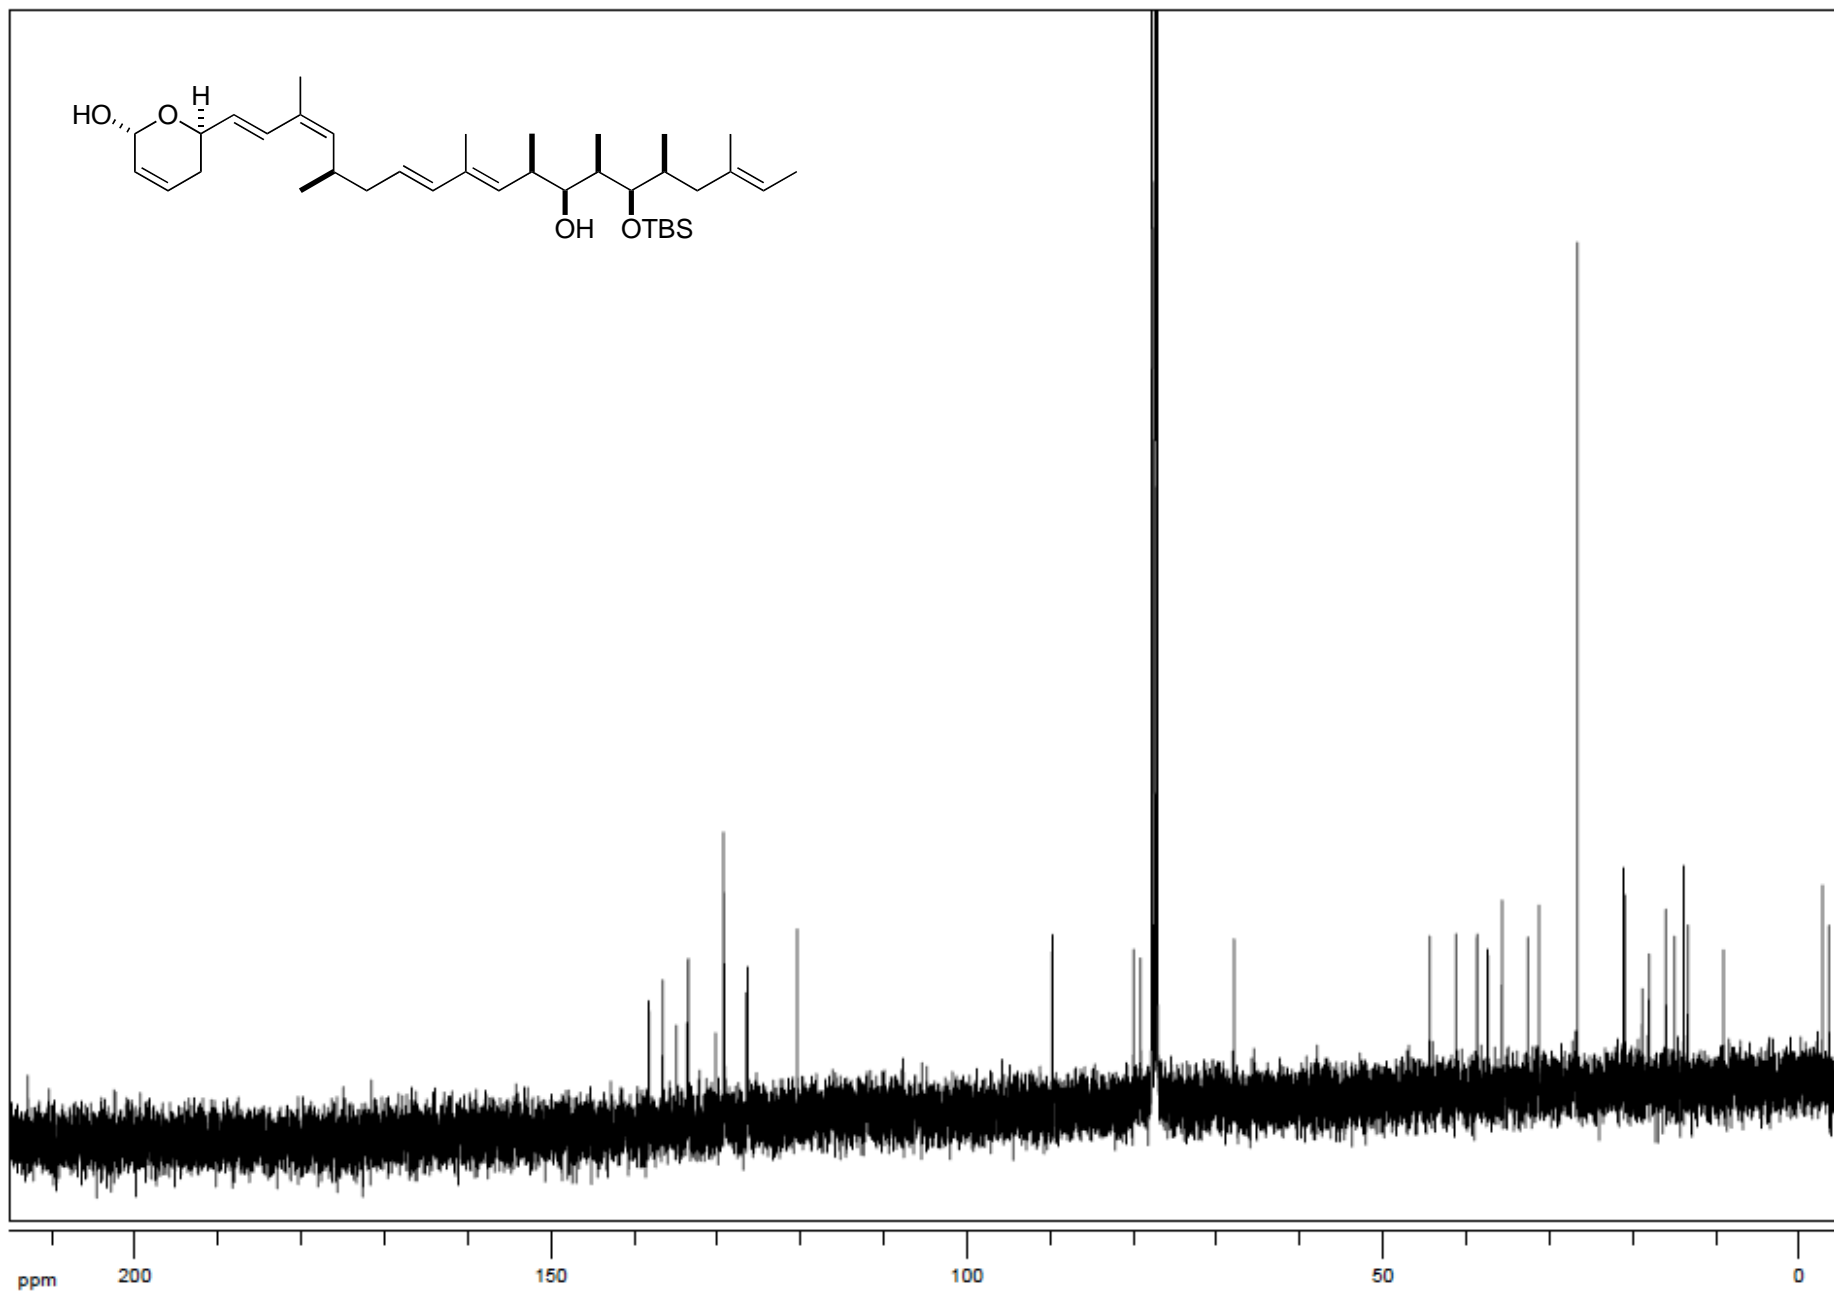

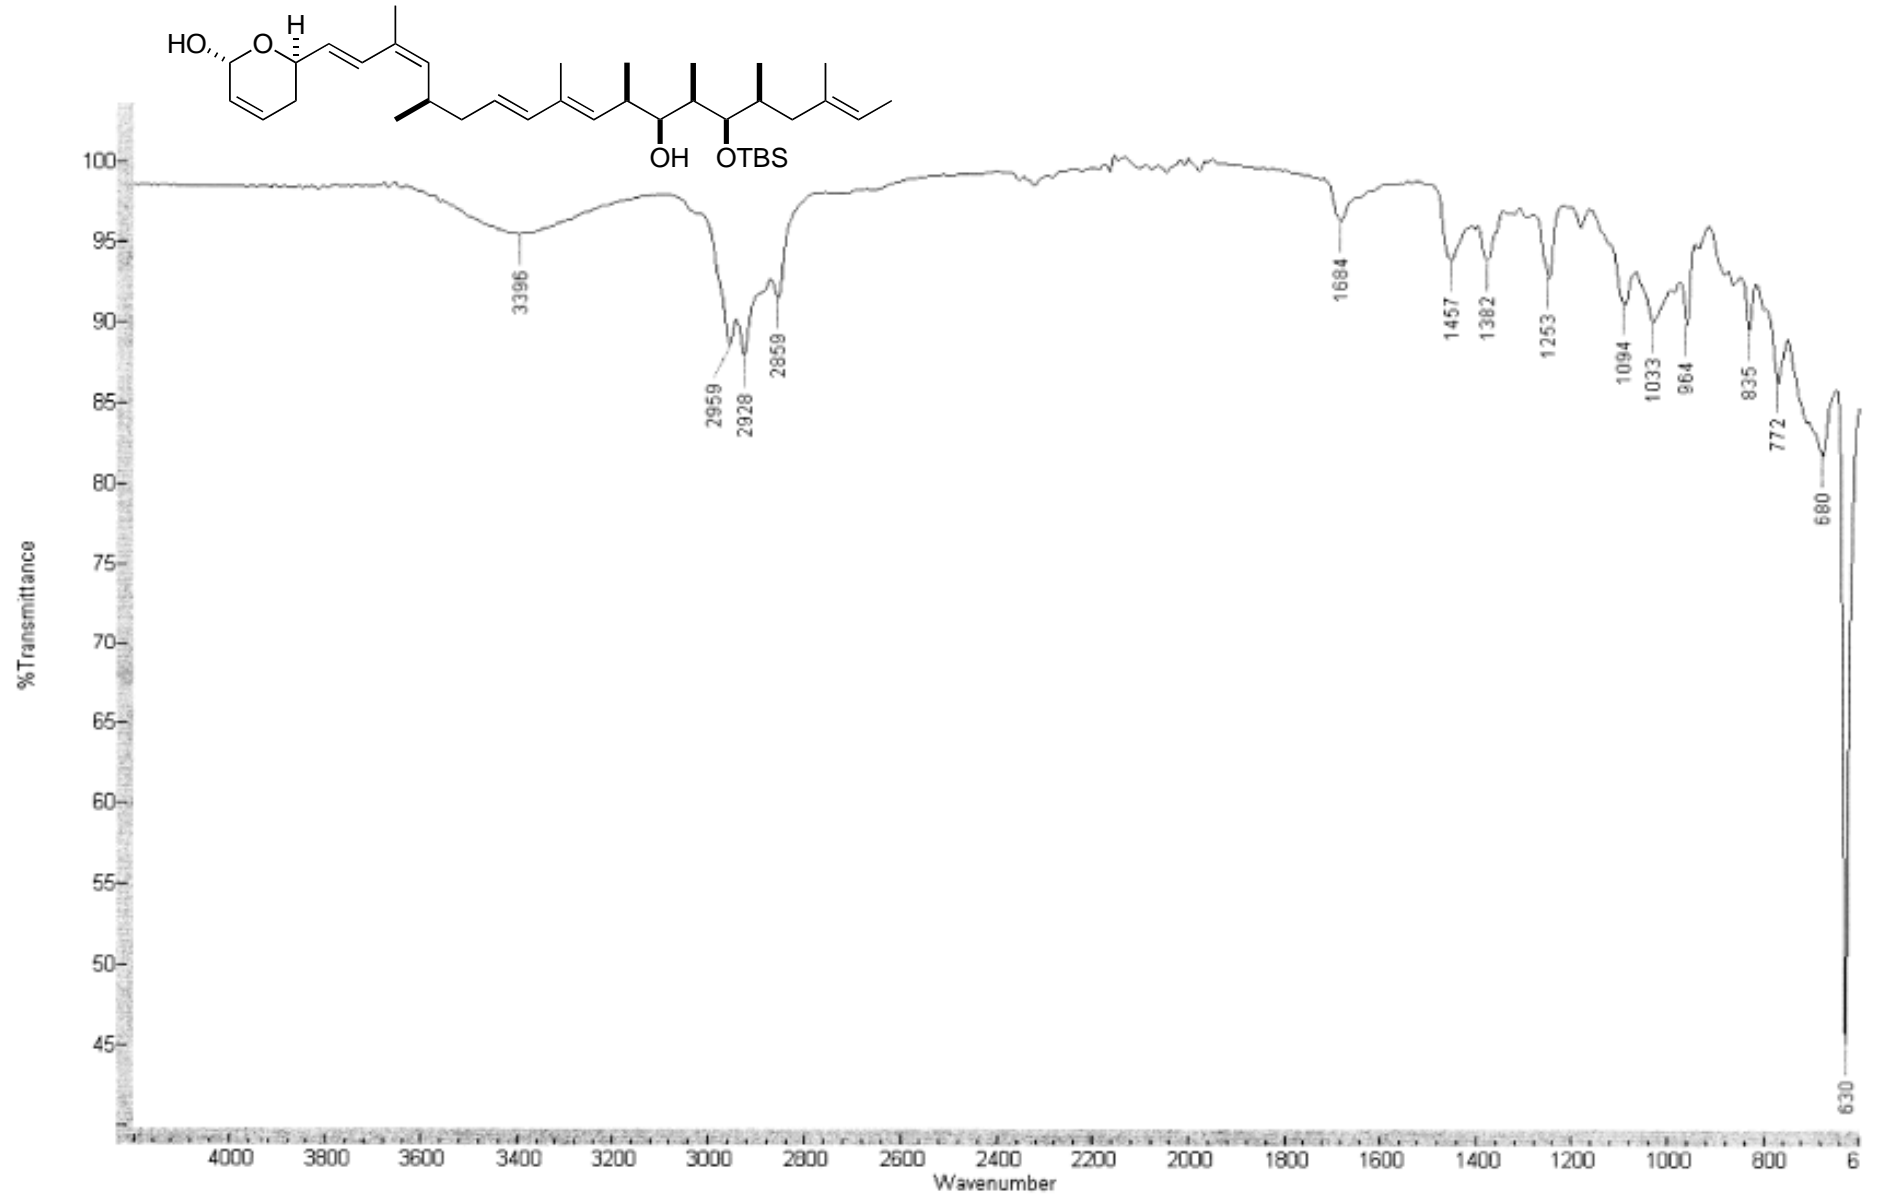

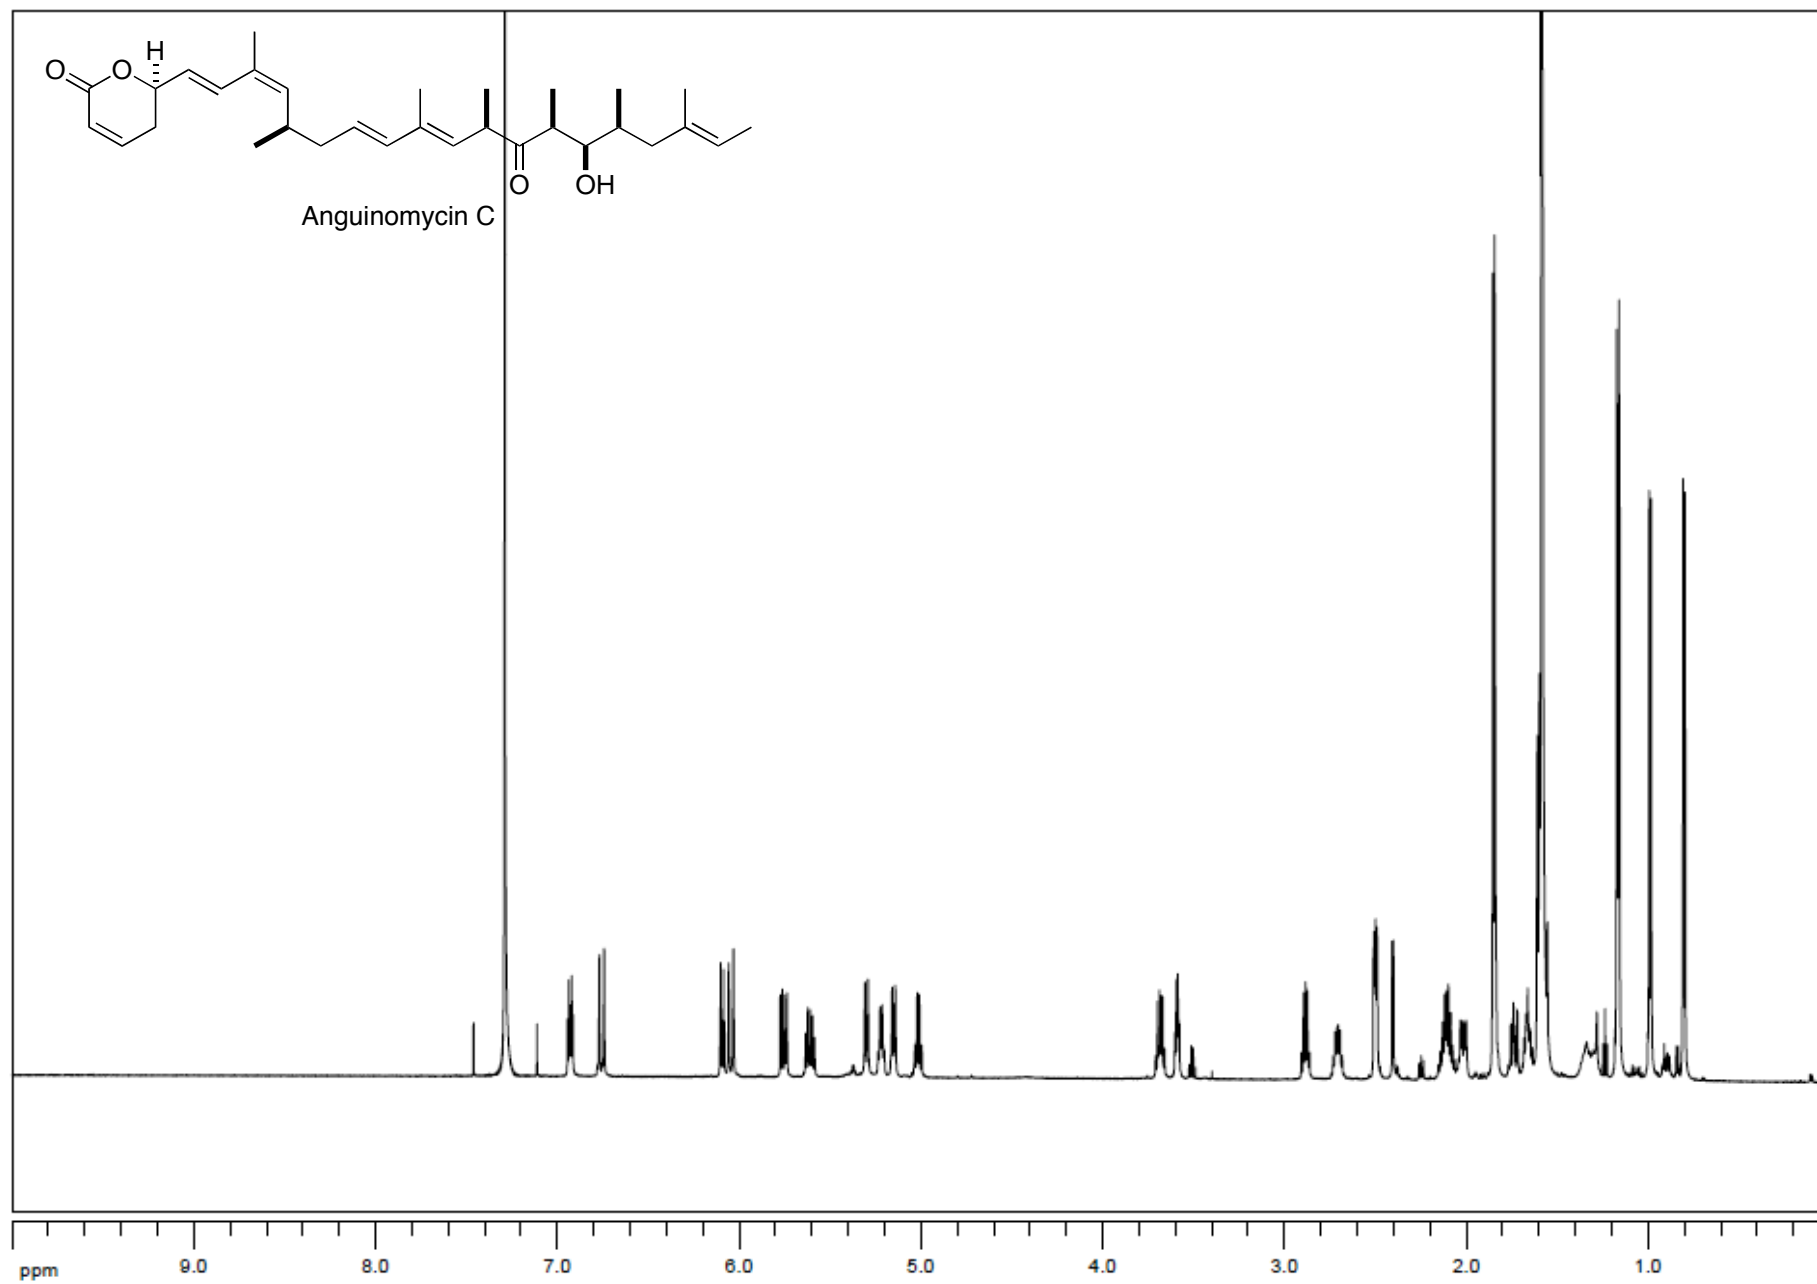





Anguinomycin C

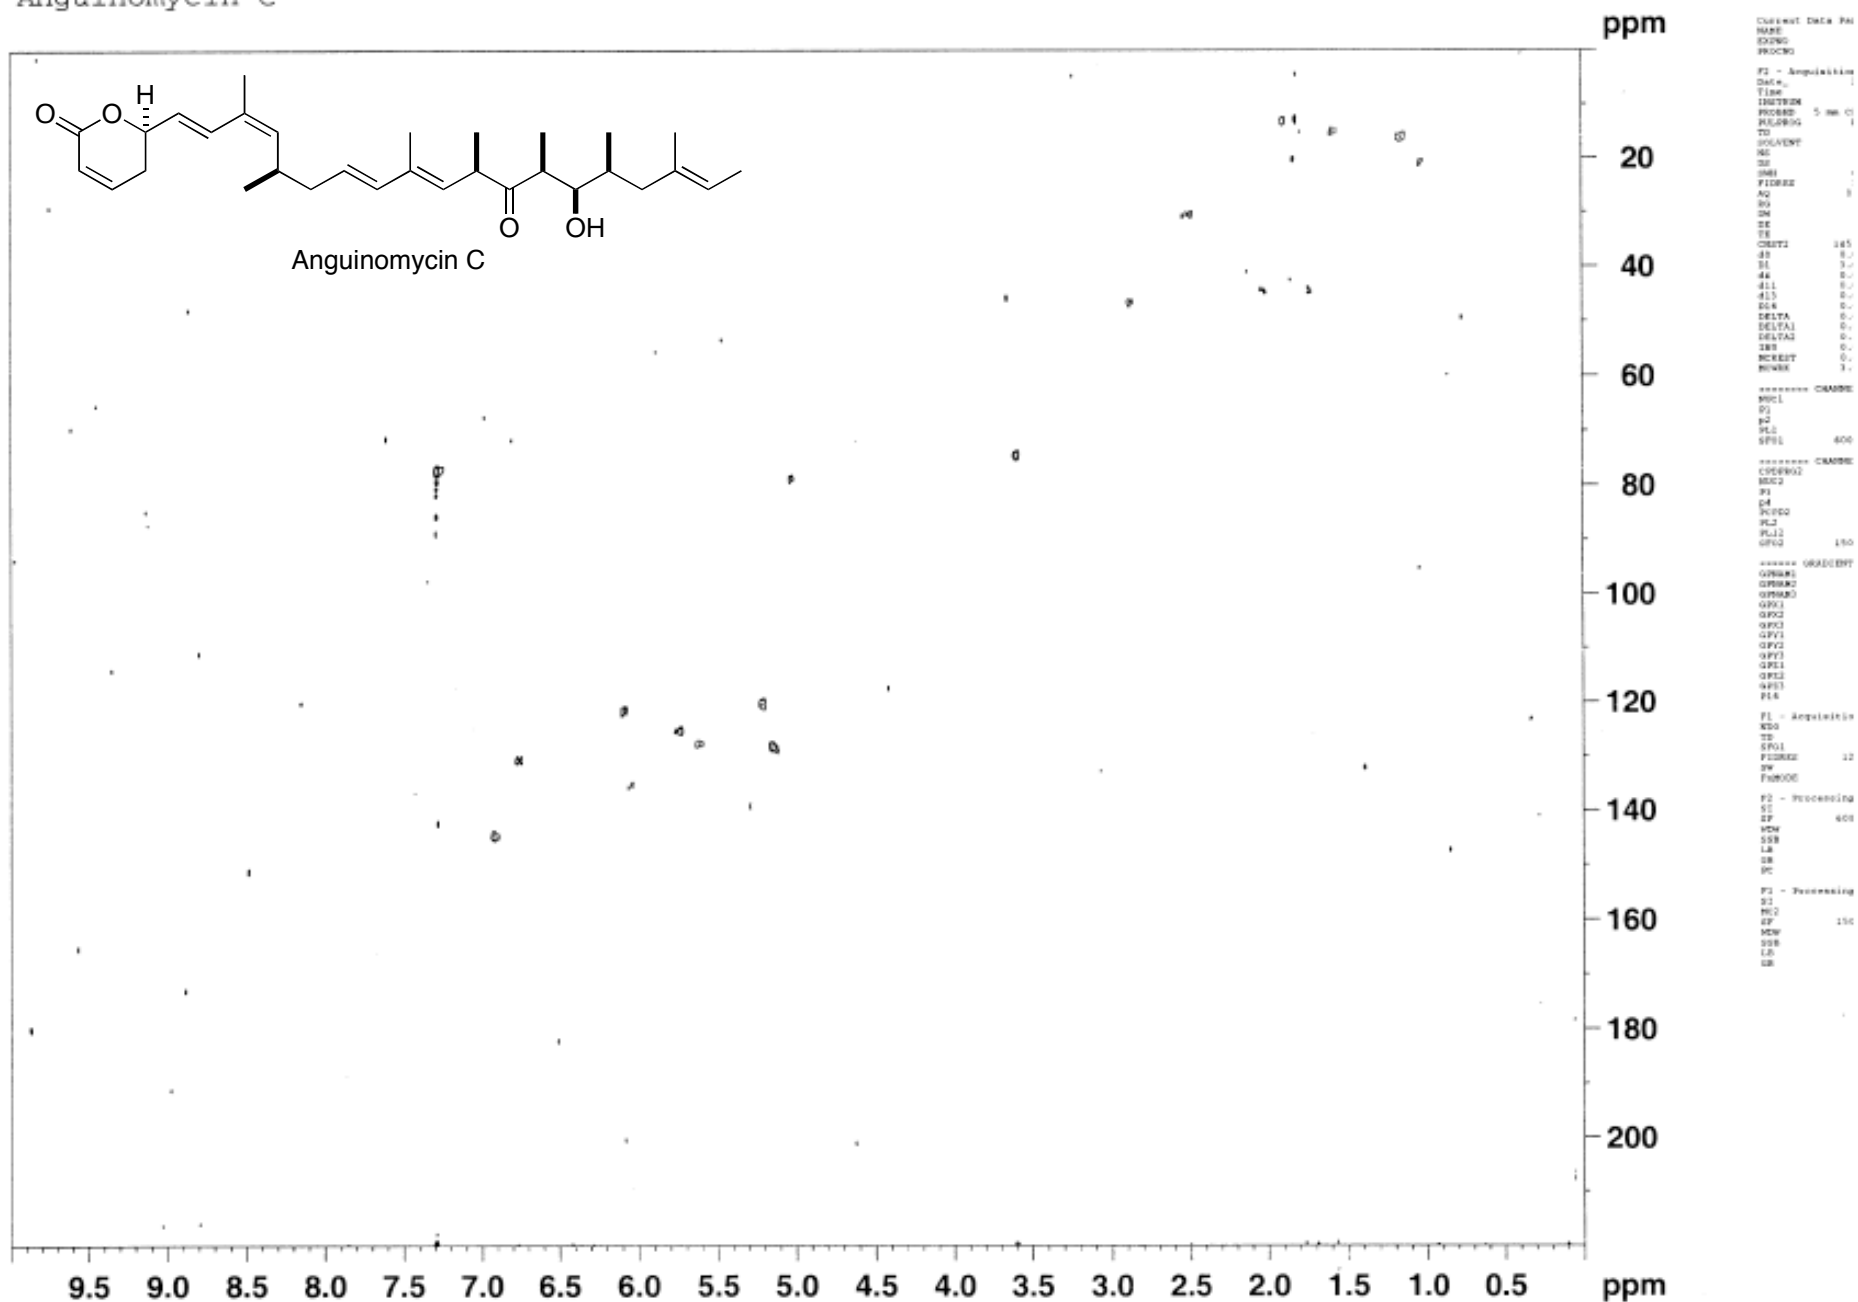

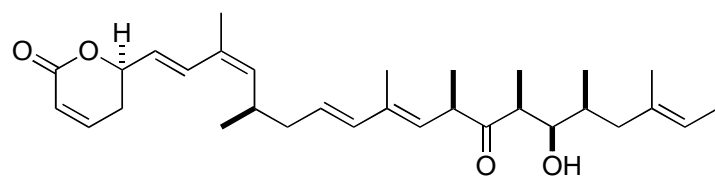

Anguinomycin C

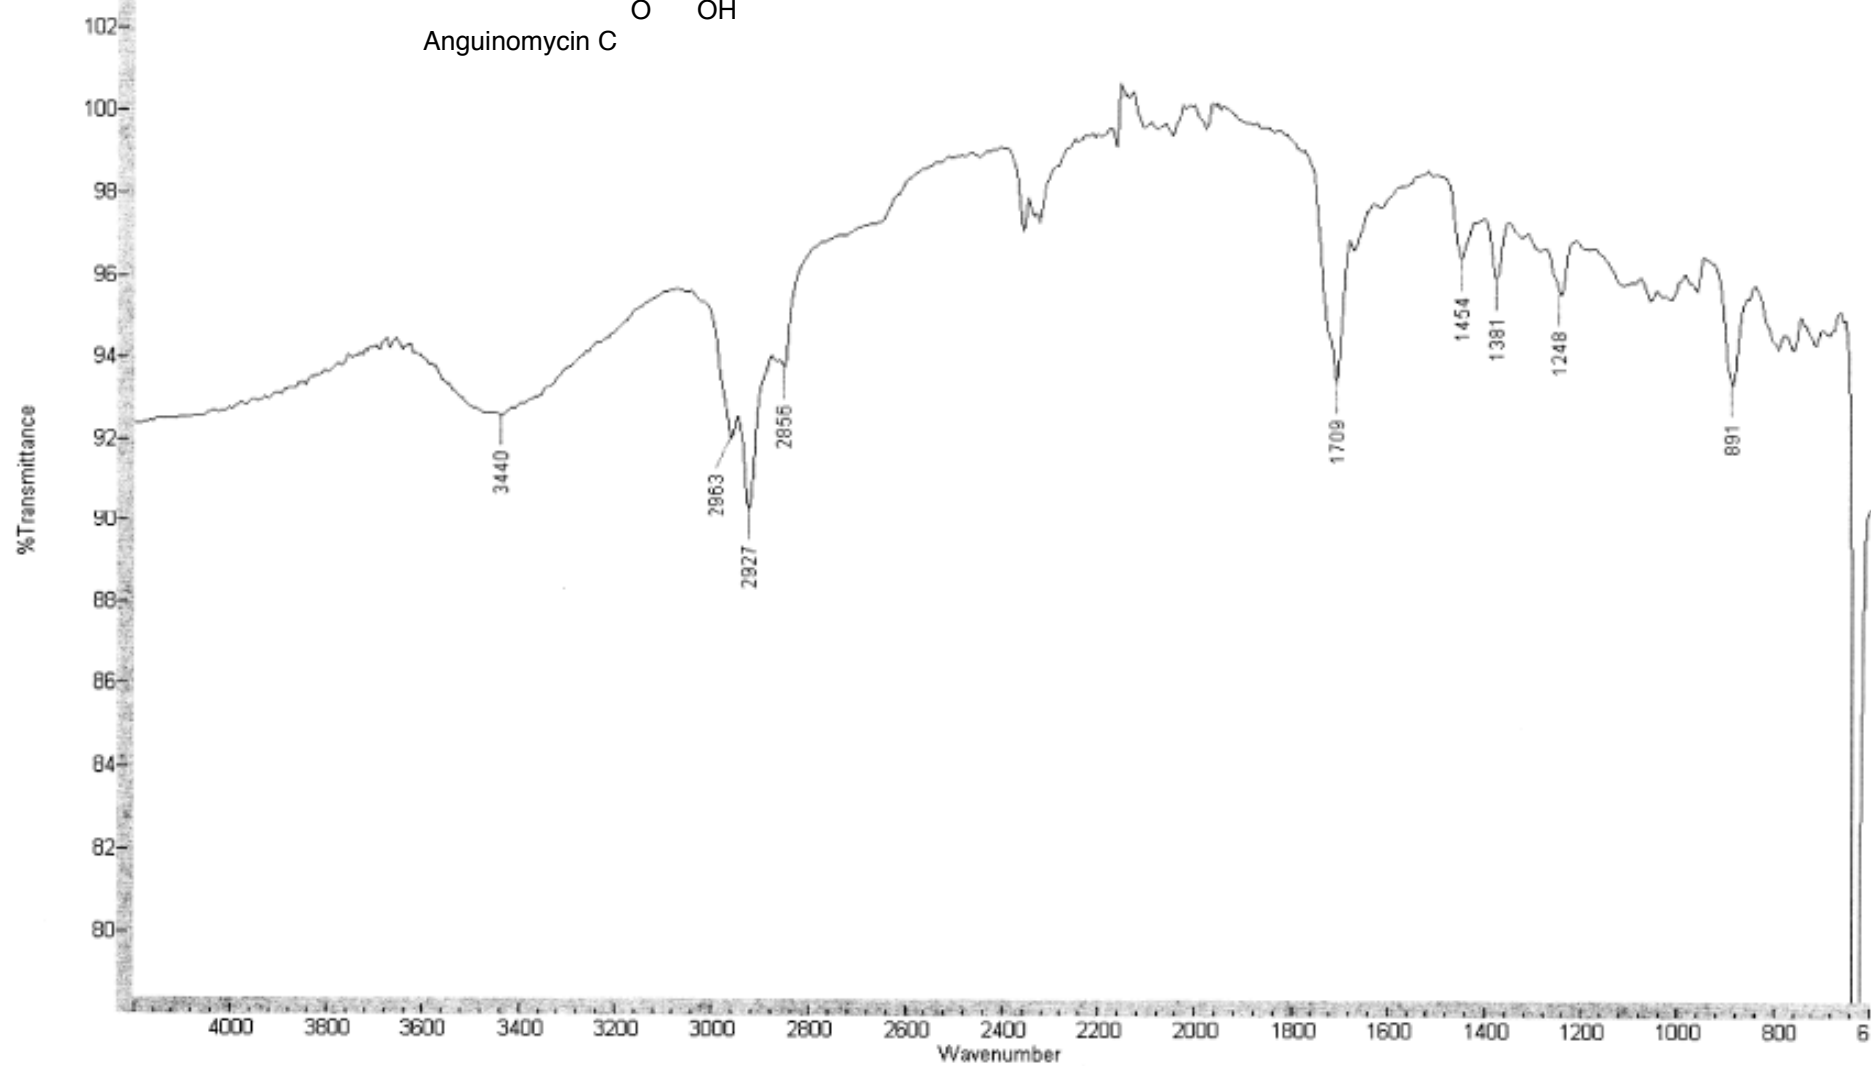

**Natural Anguinomycin C**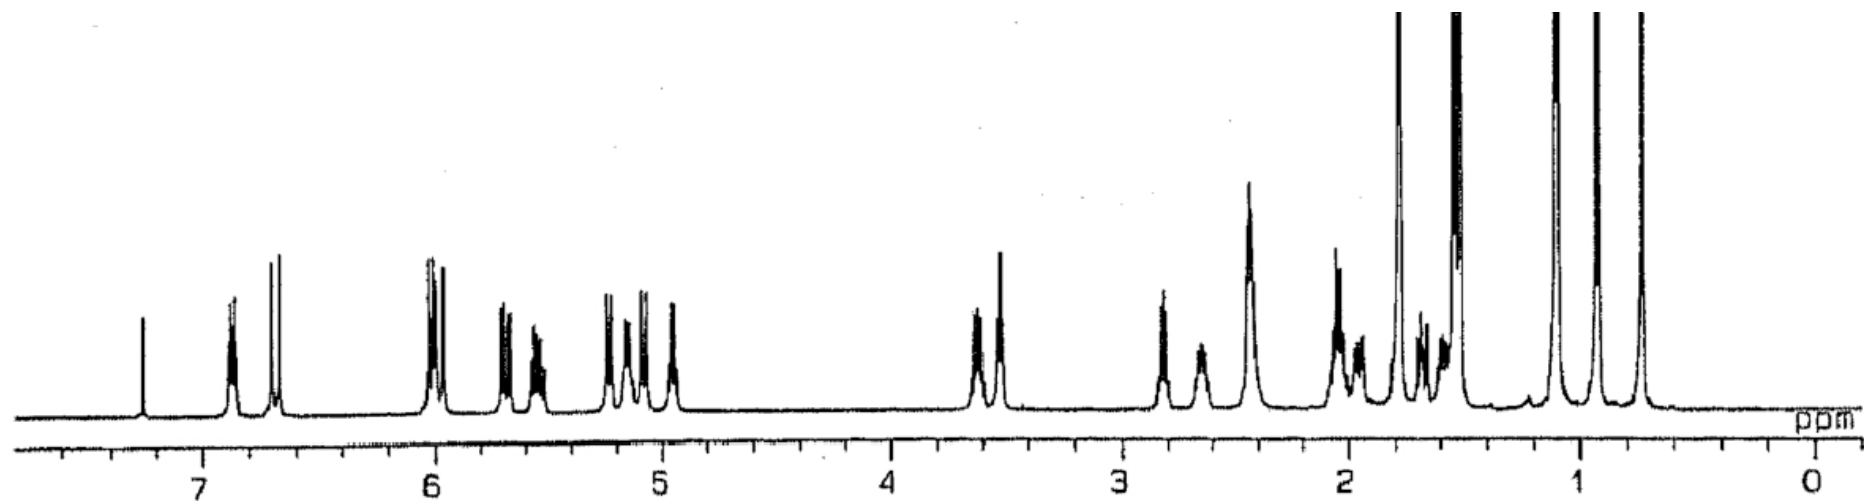**Synthetic Anguinomycin C**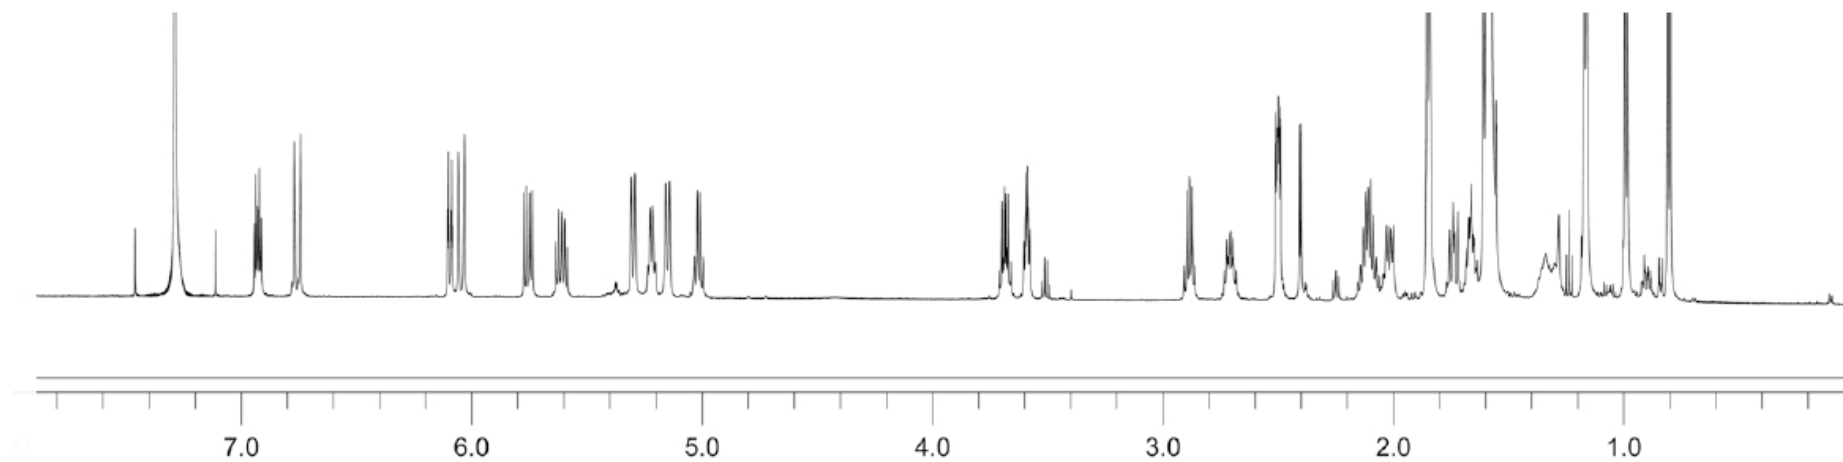

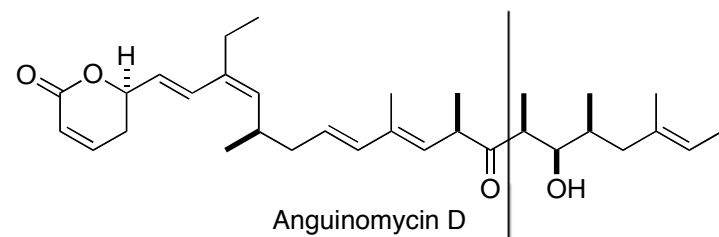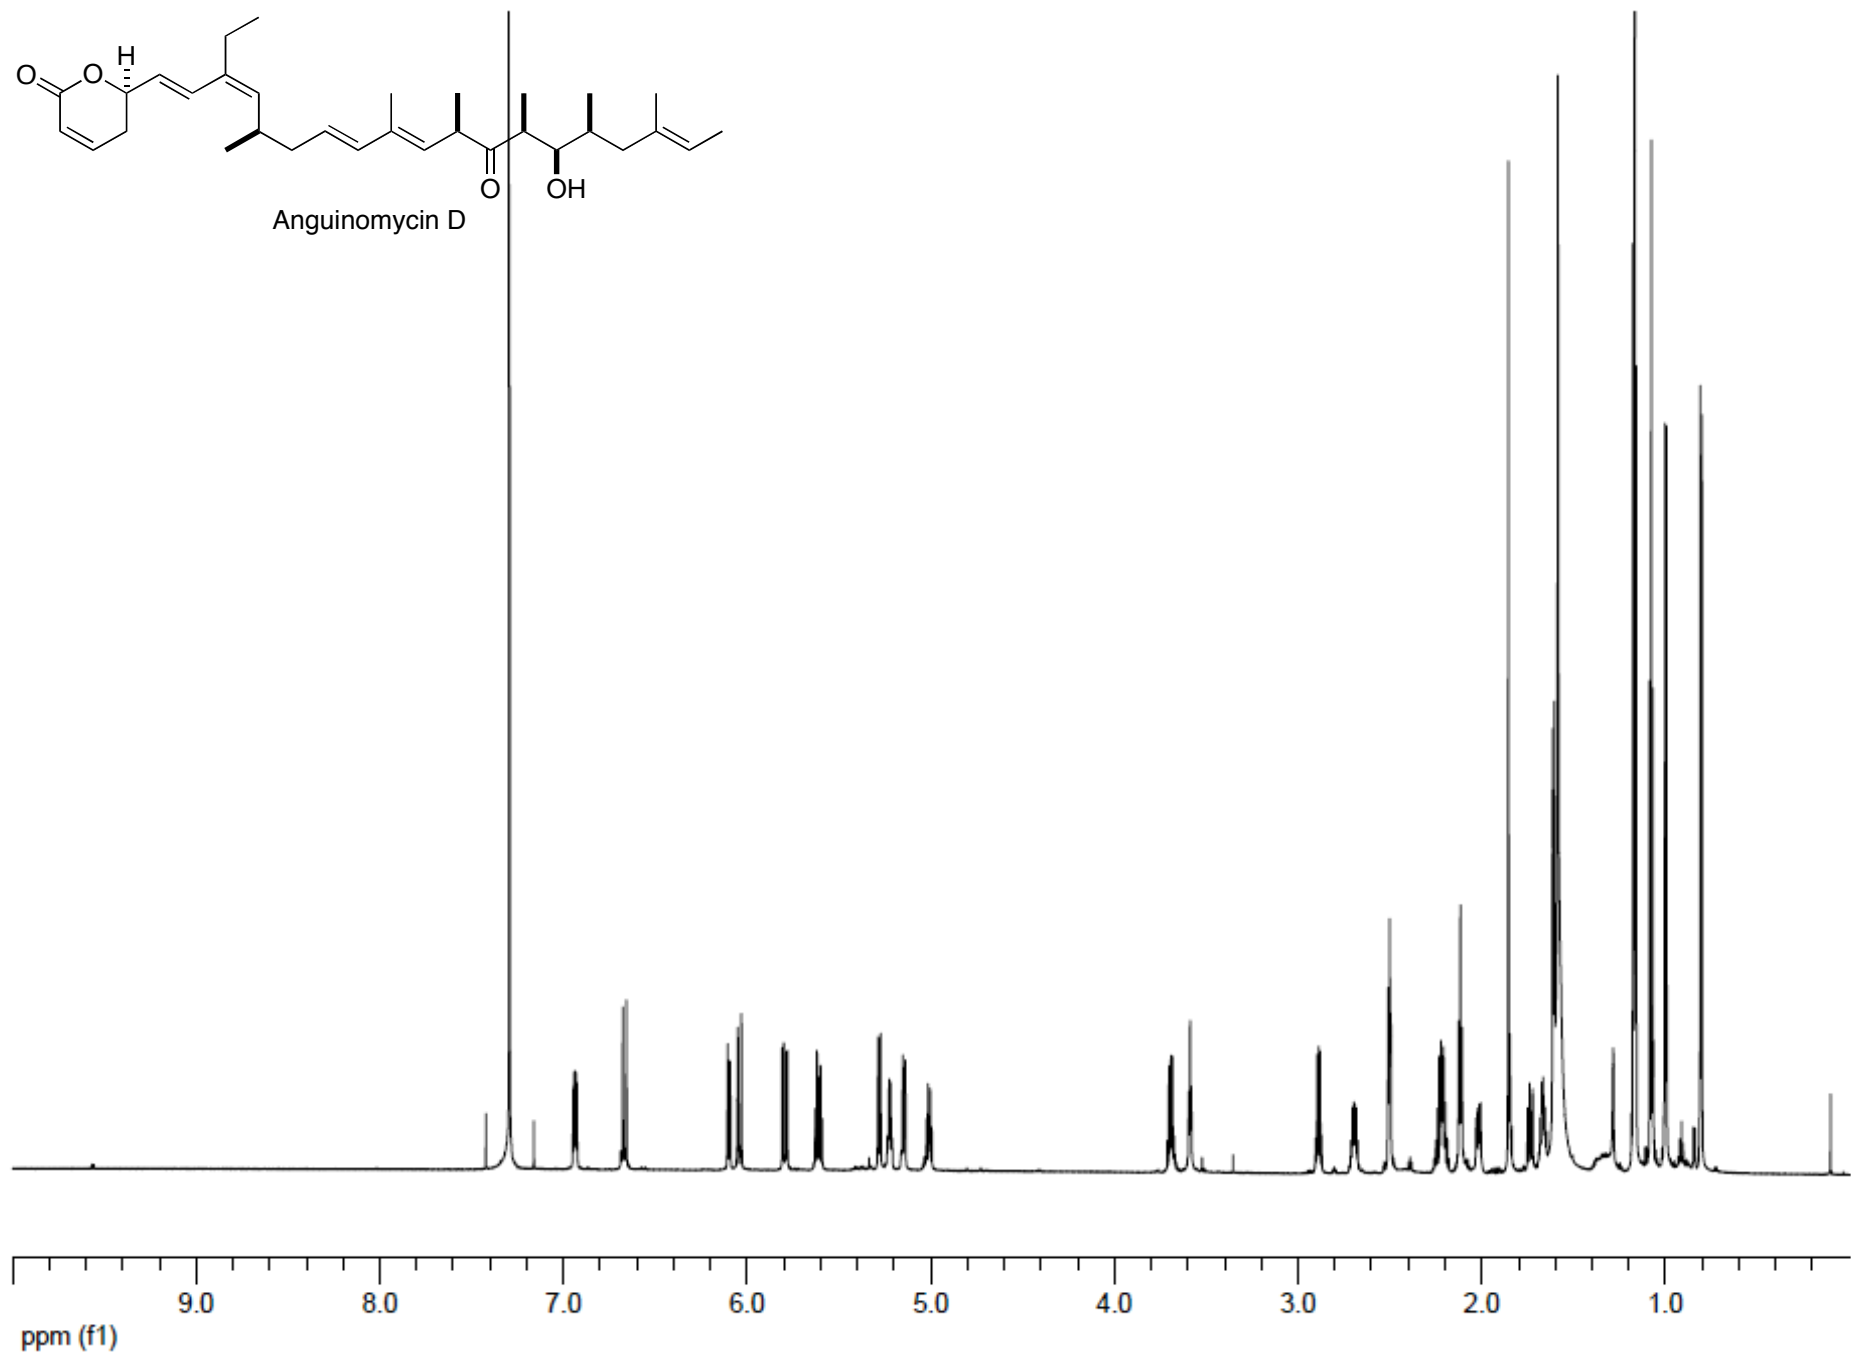

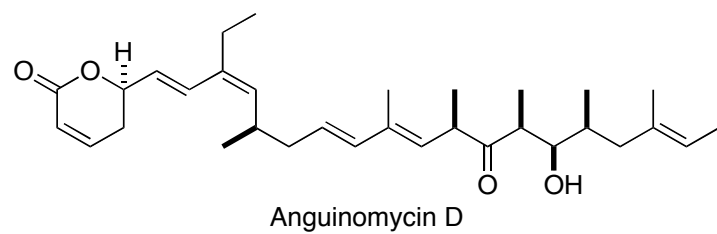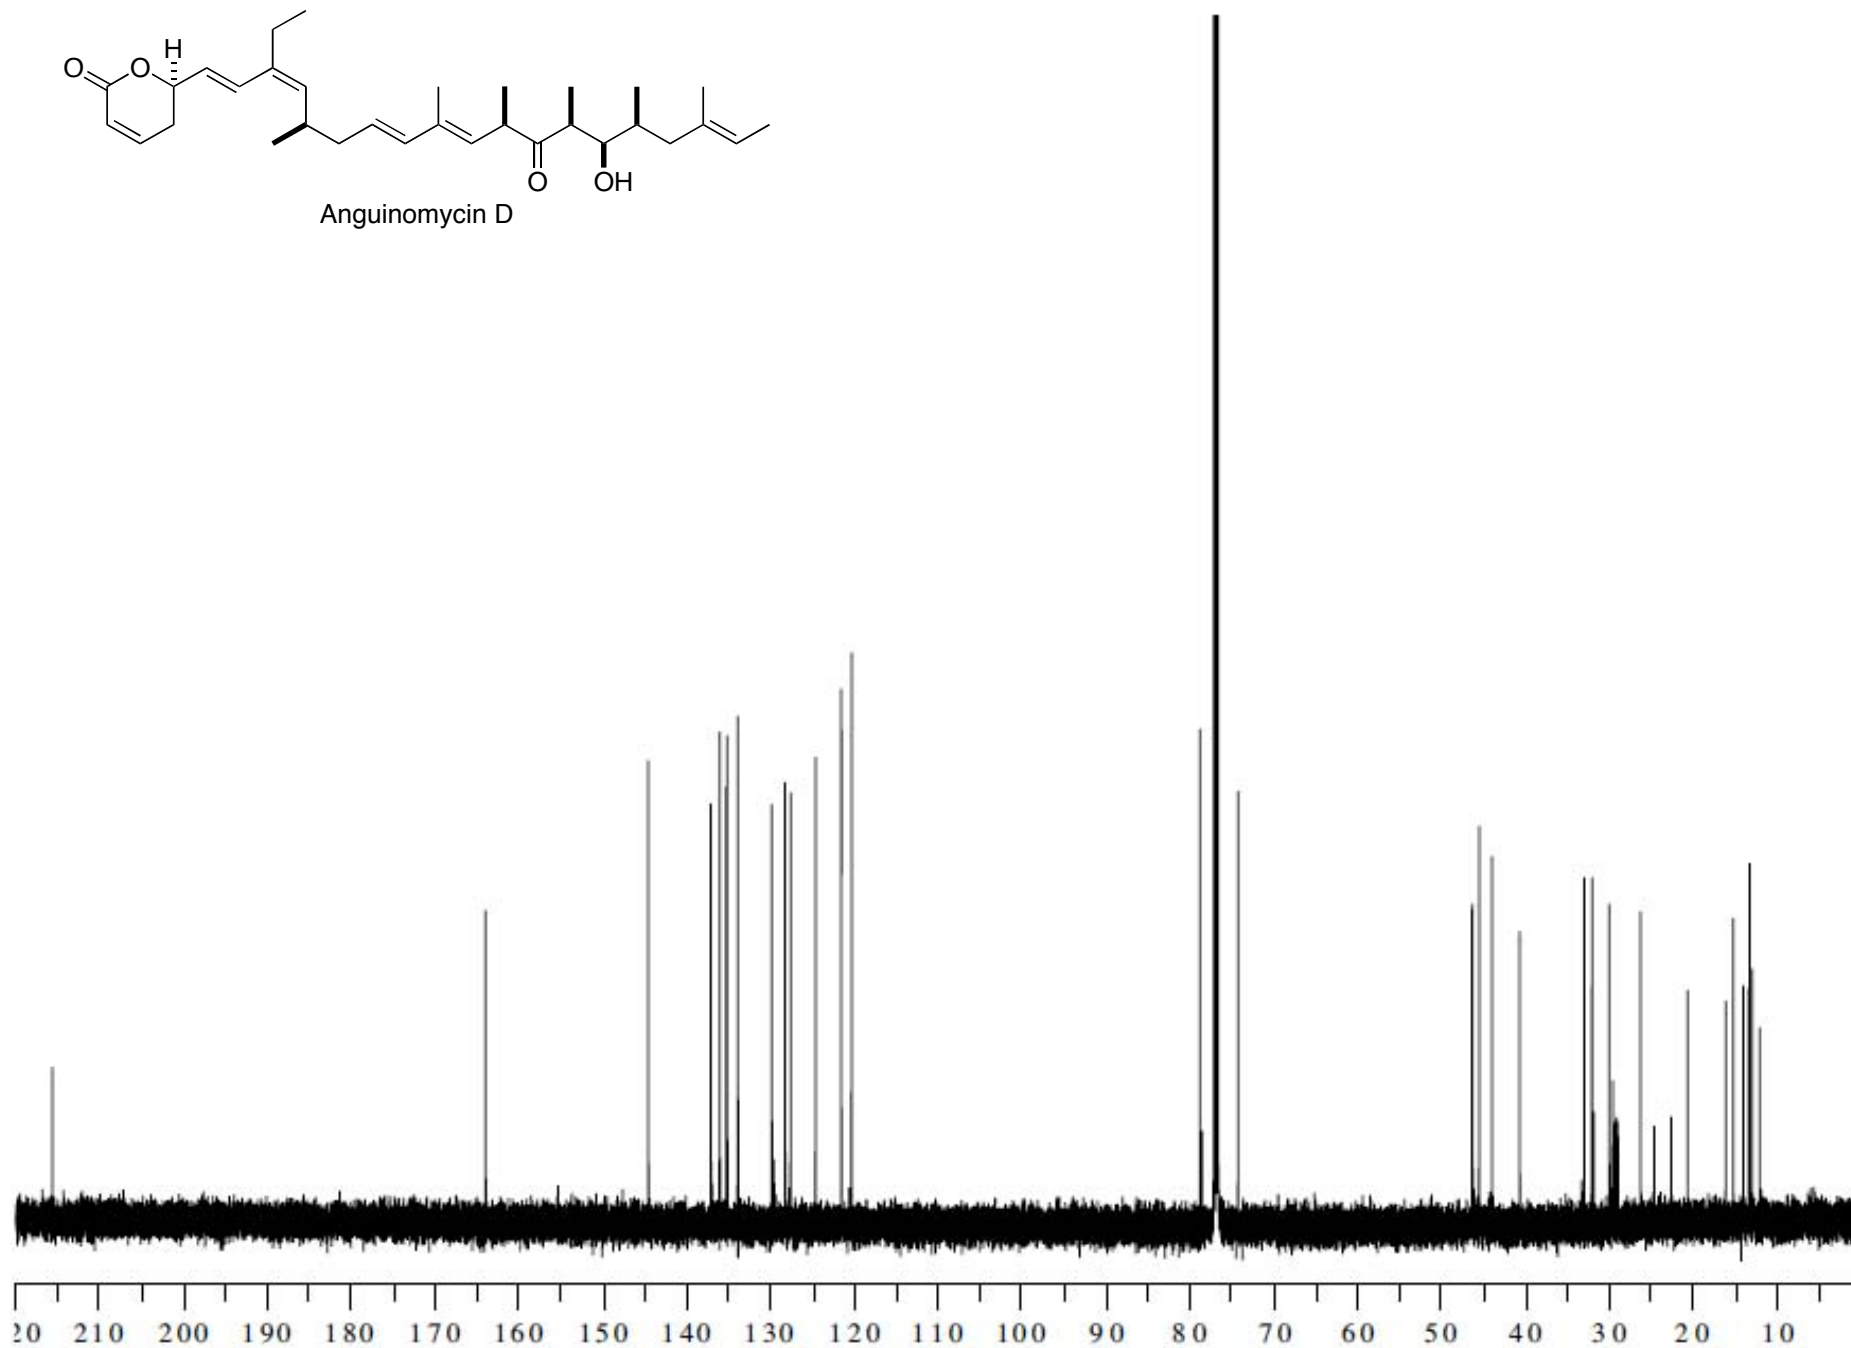

**Natural Anguinomycin D**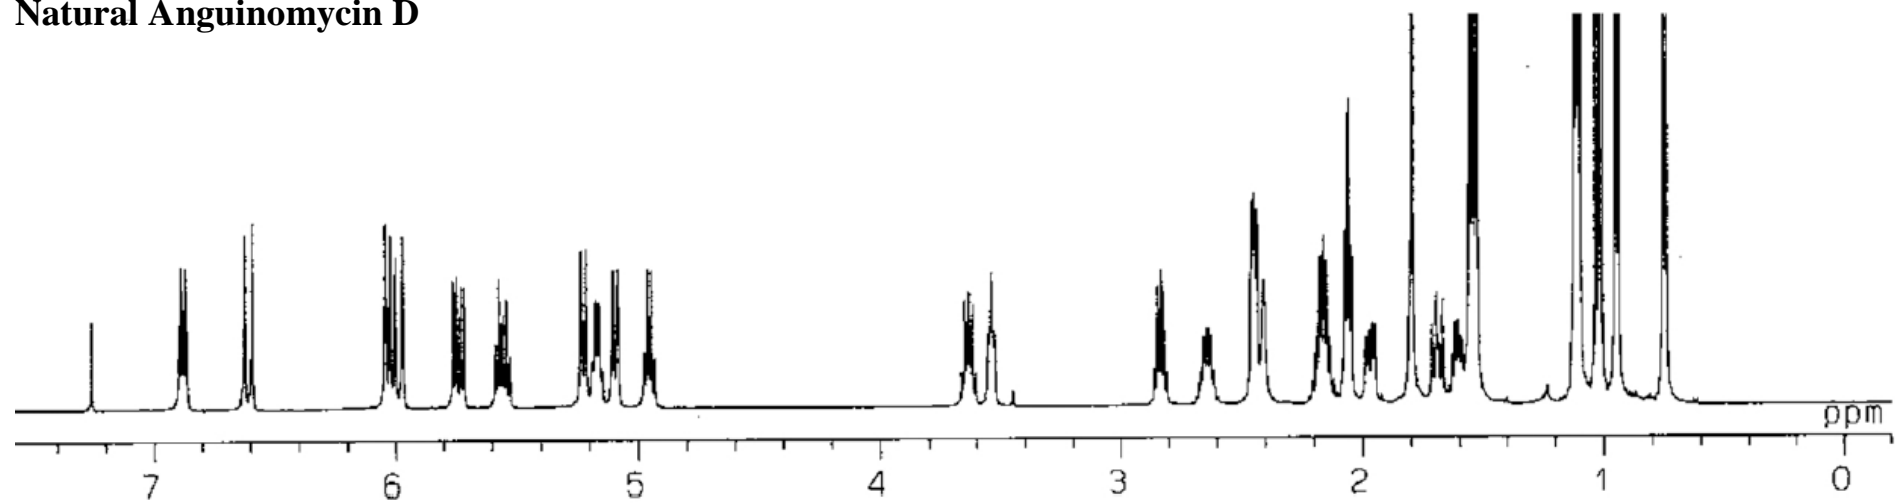**Synthetic Anguinomycin D**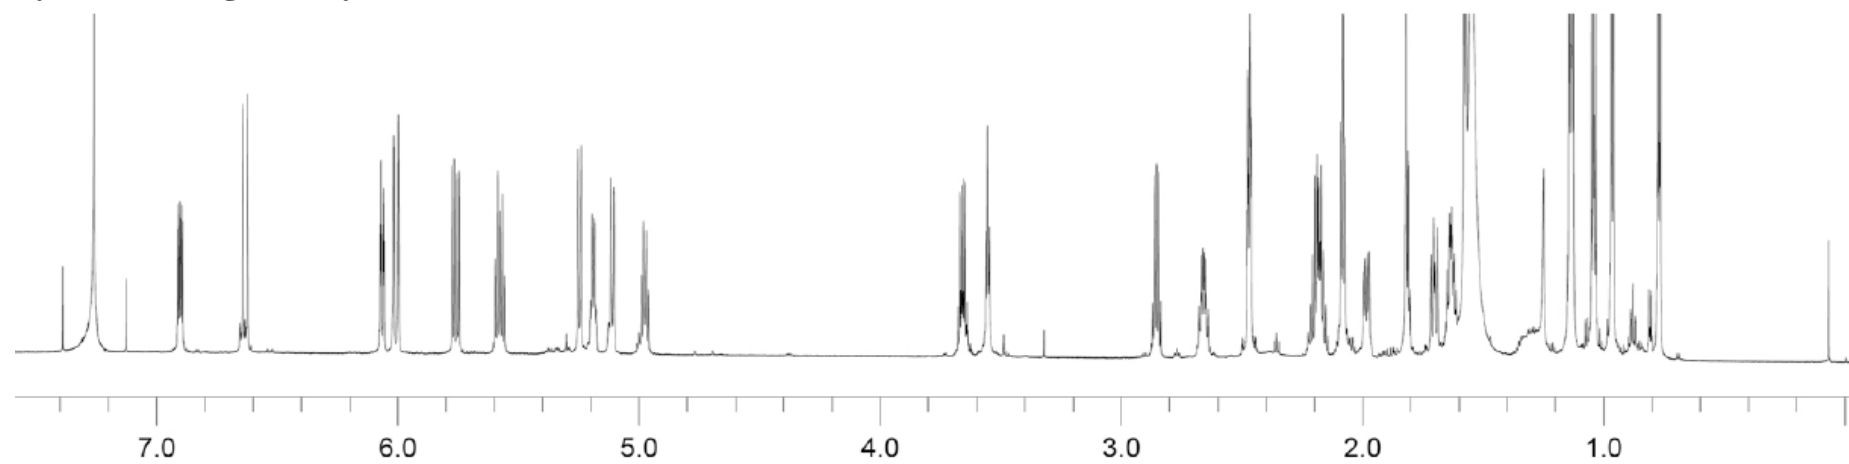

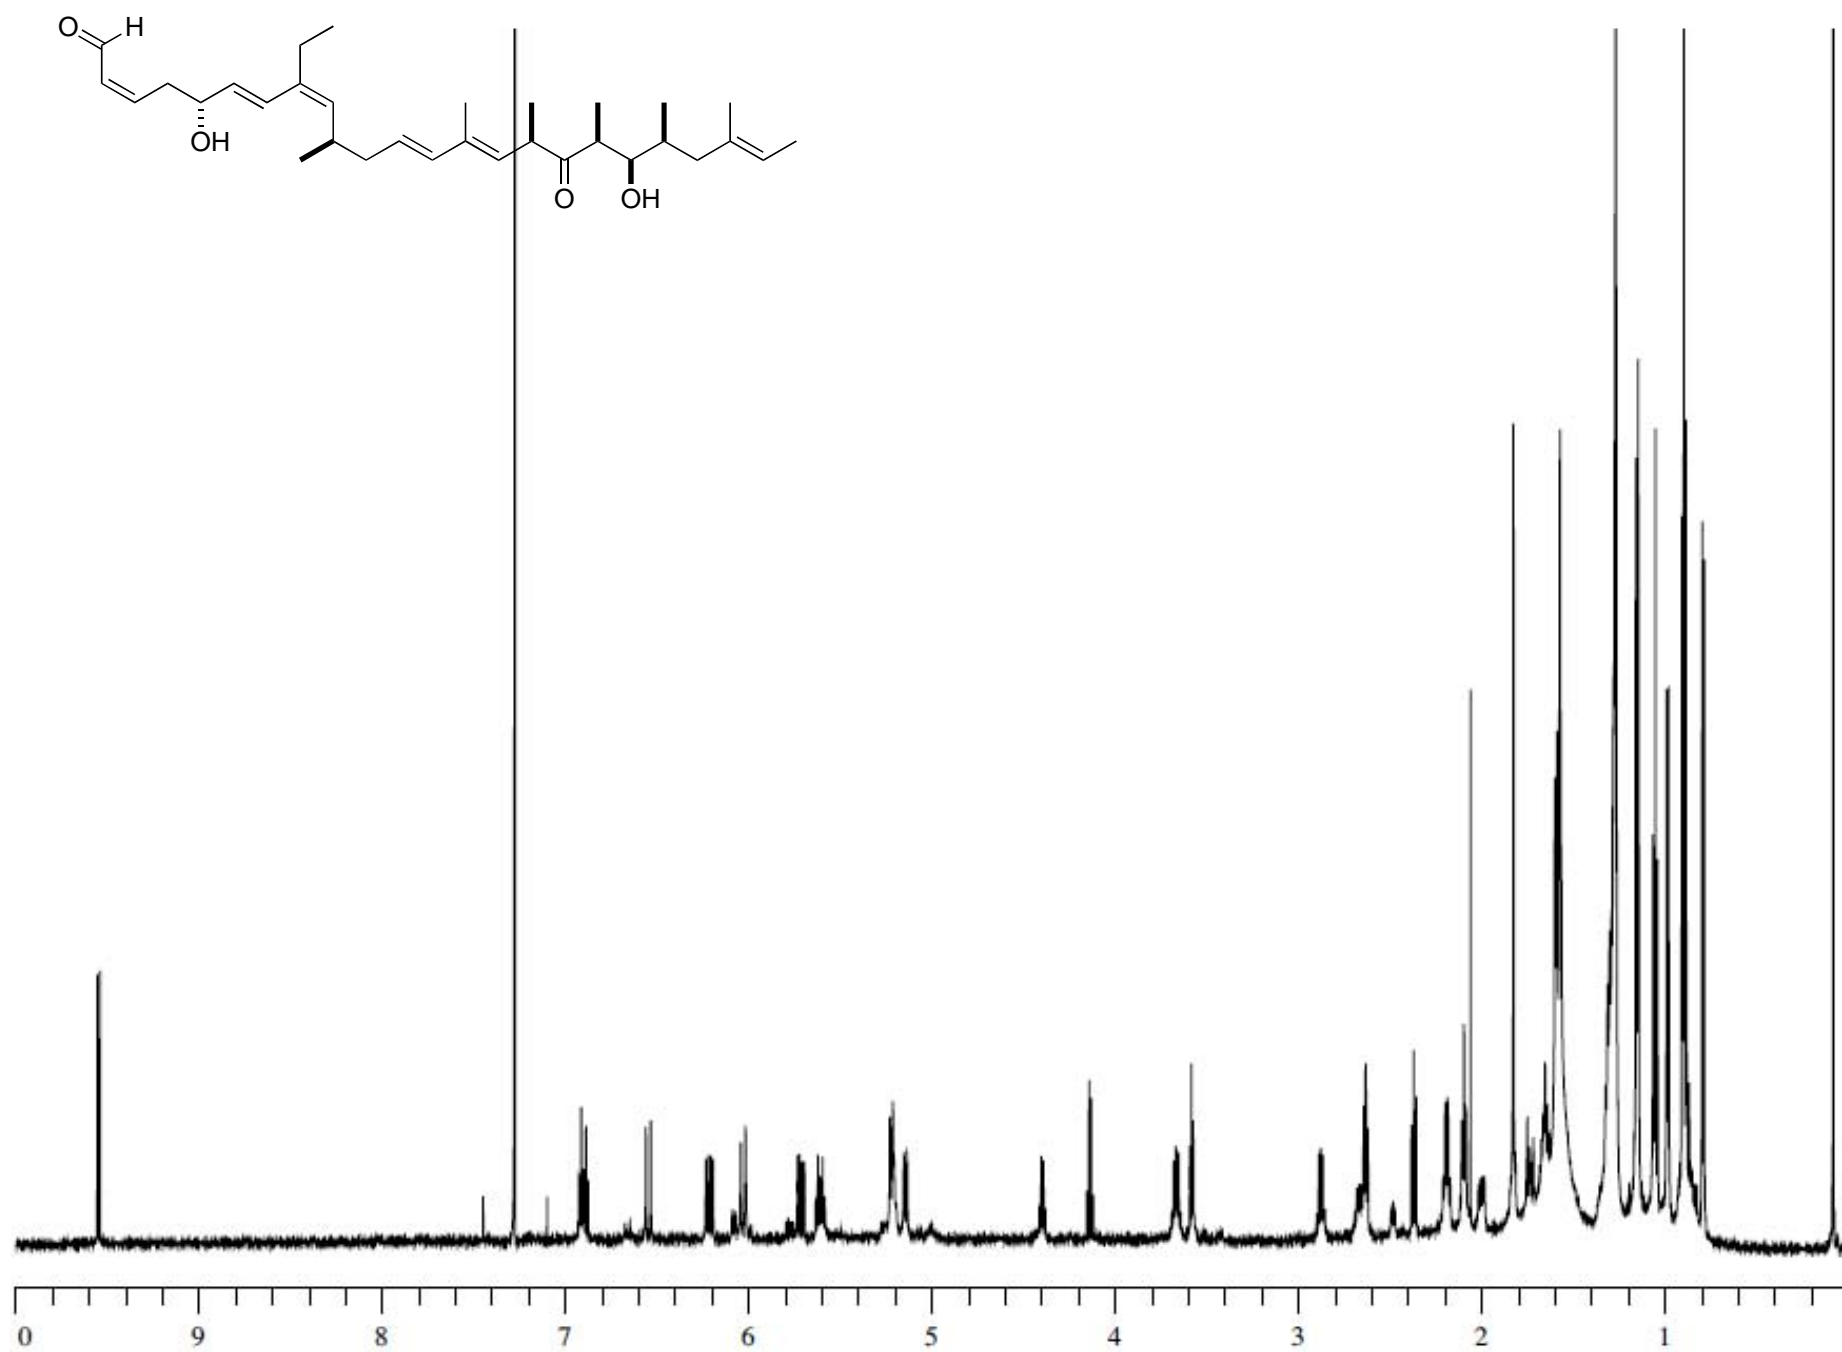



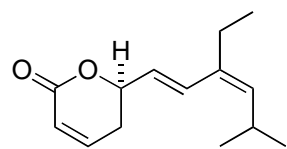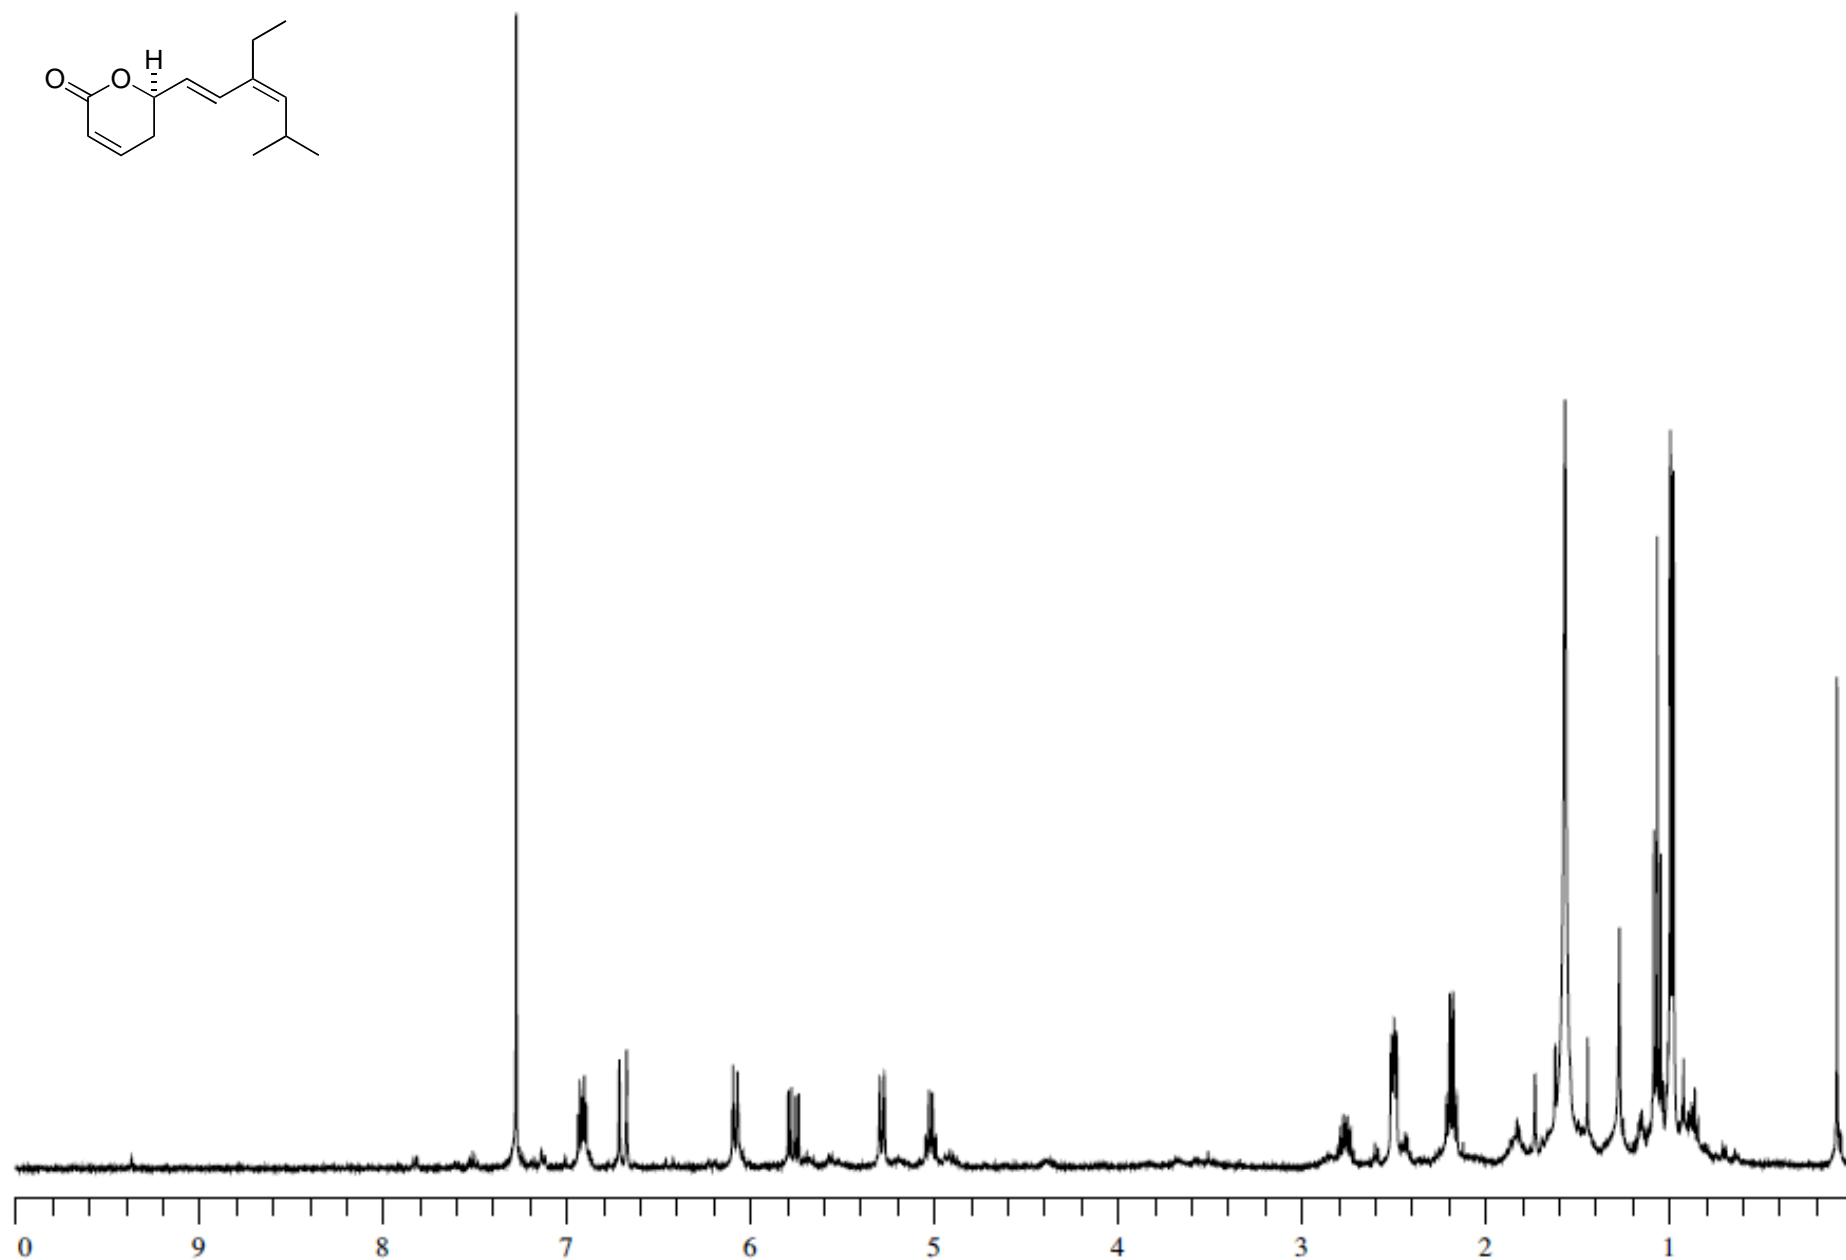

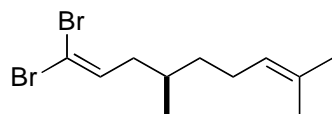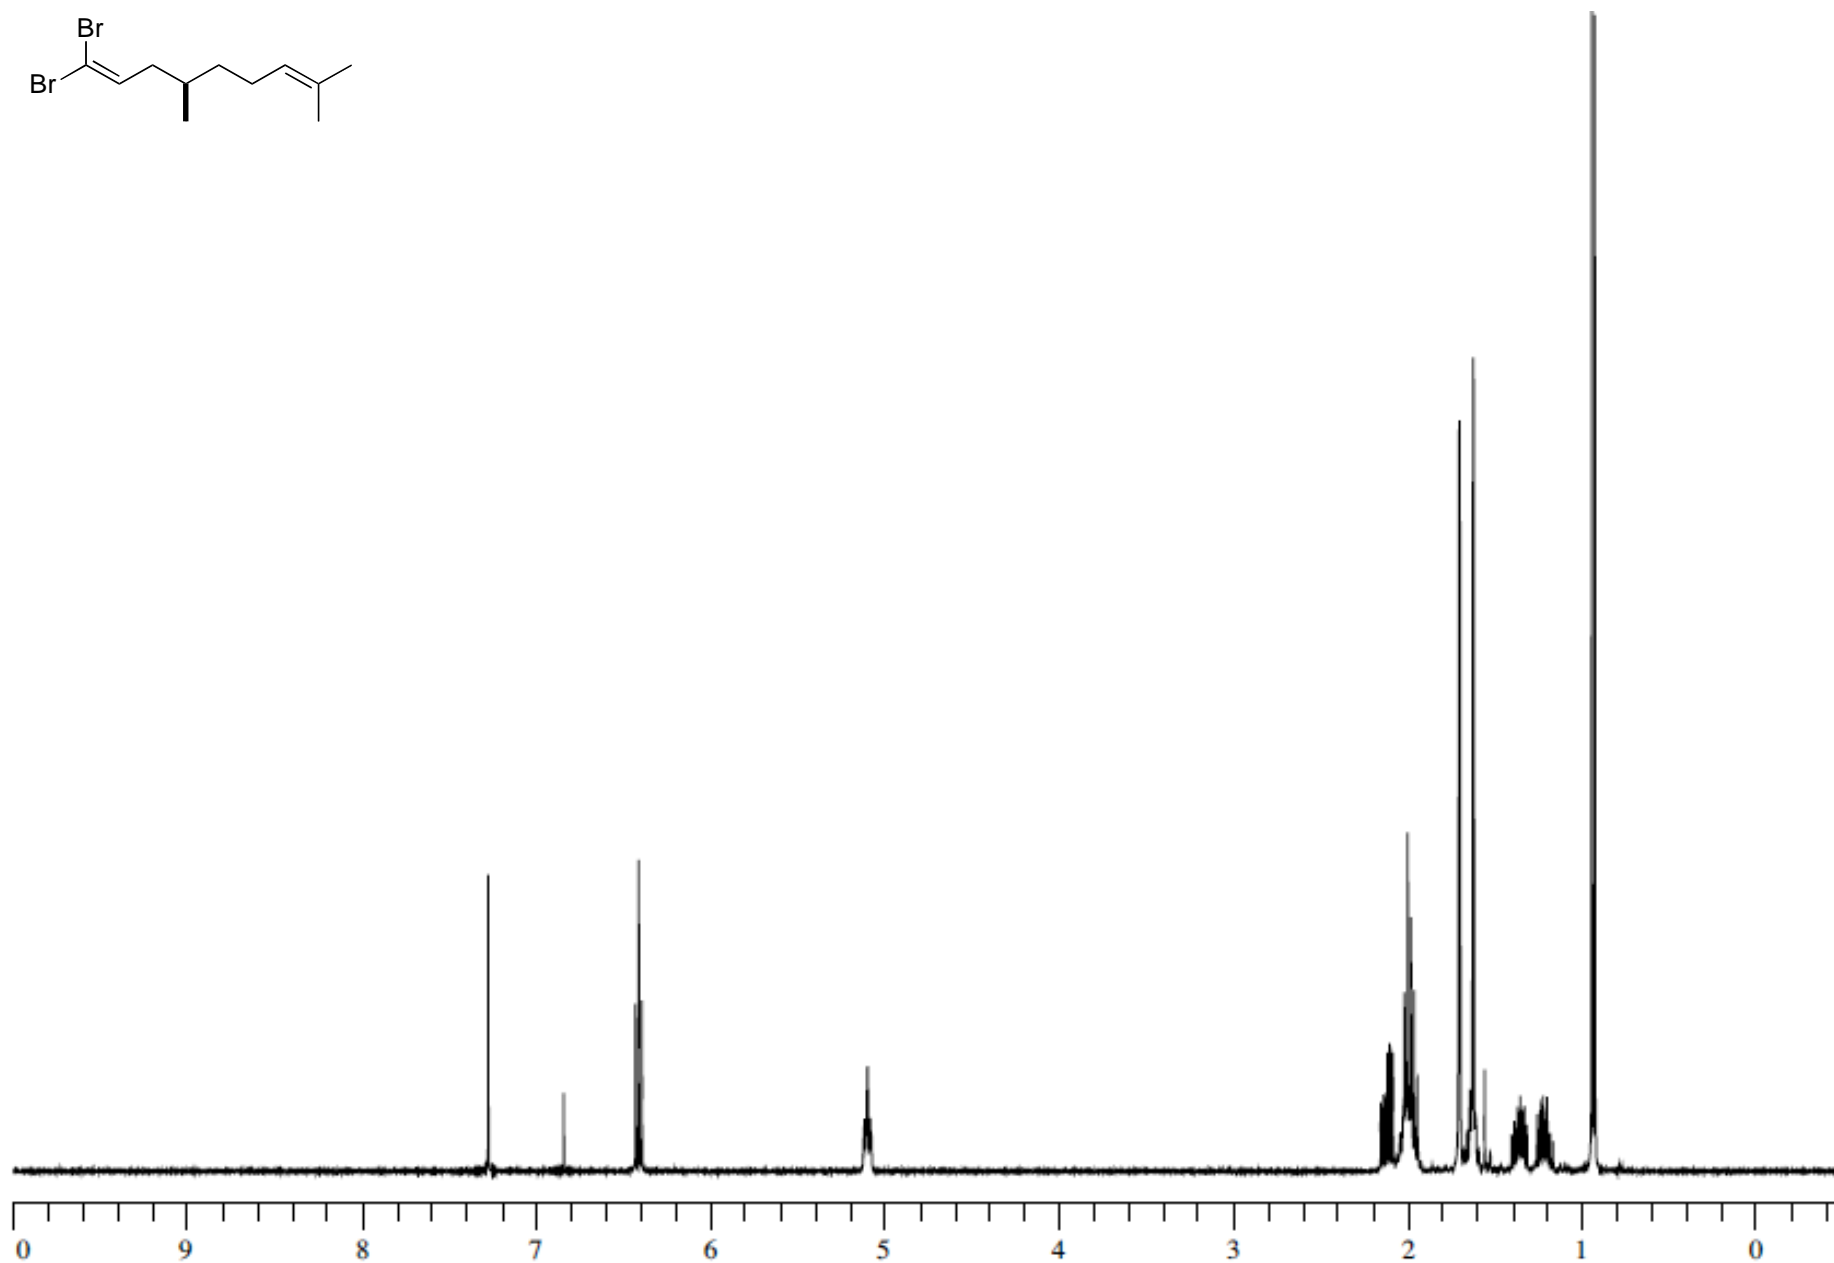

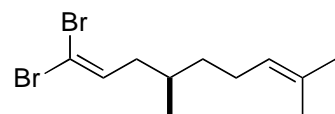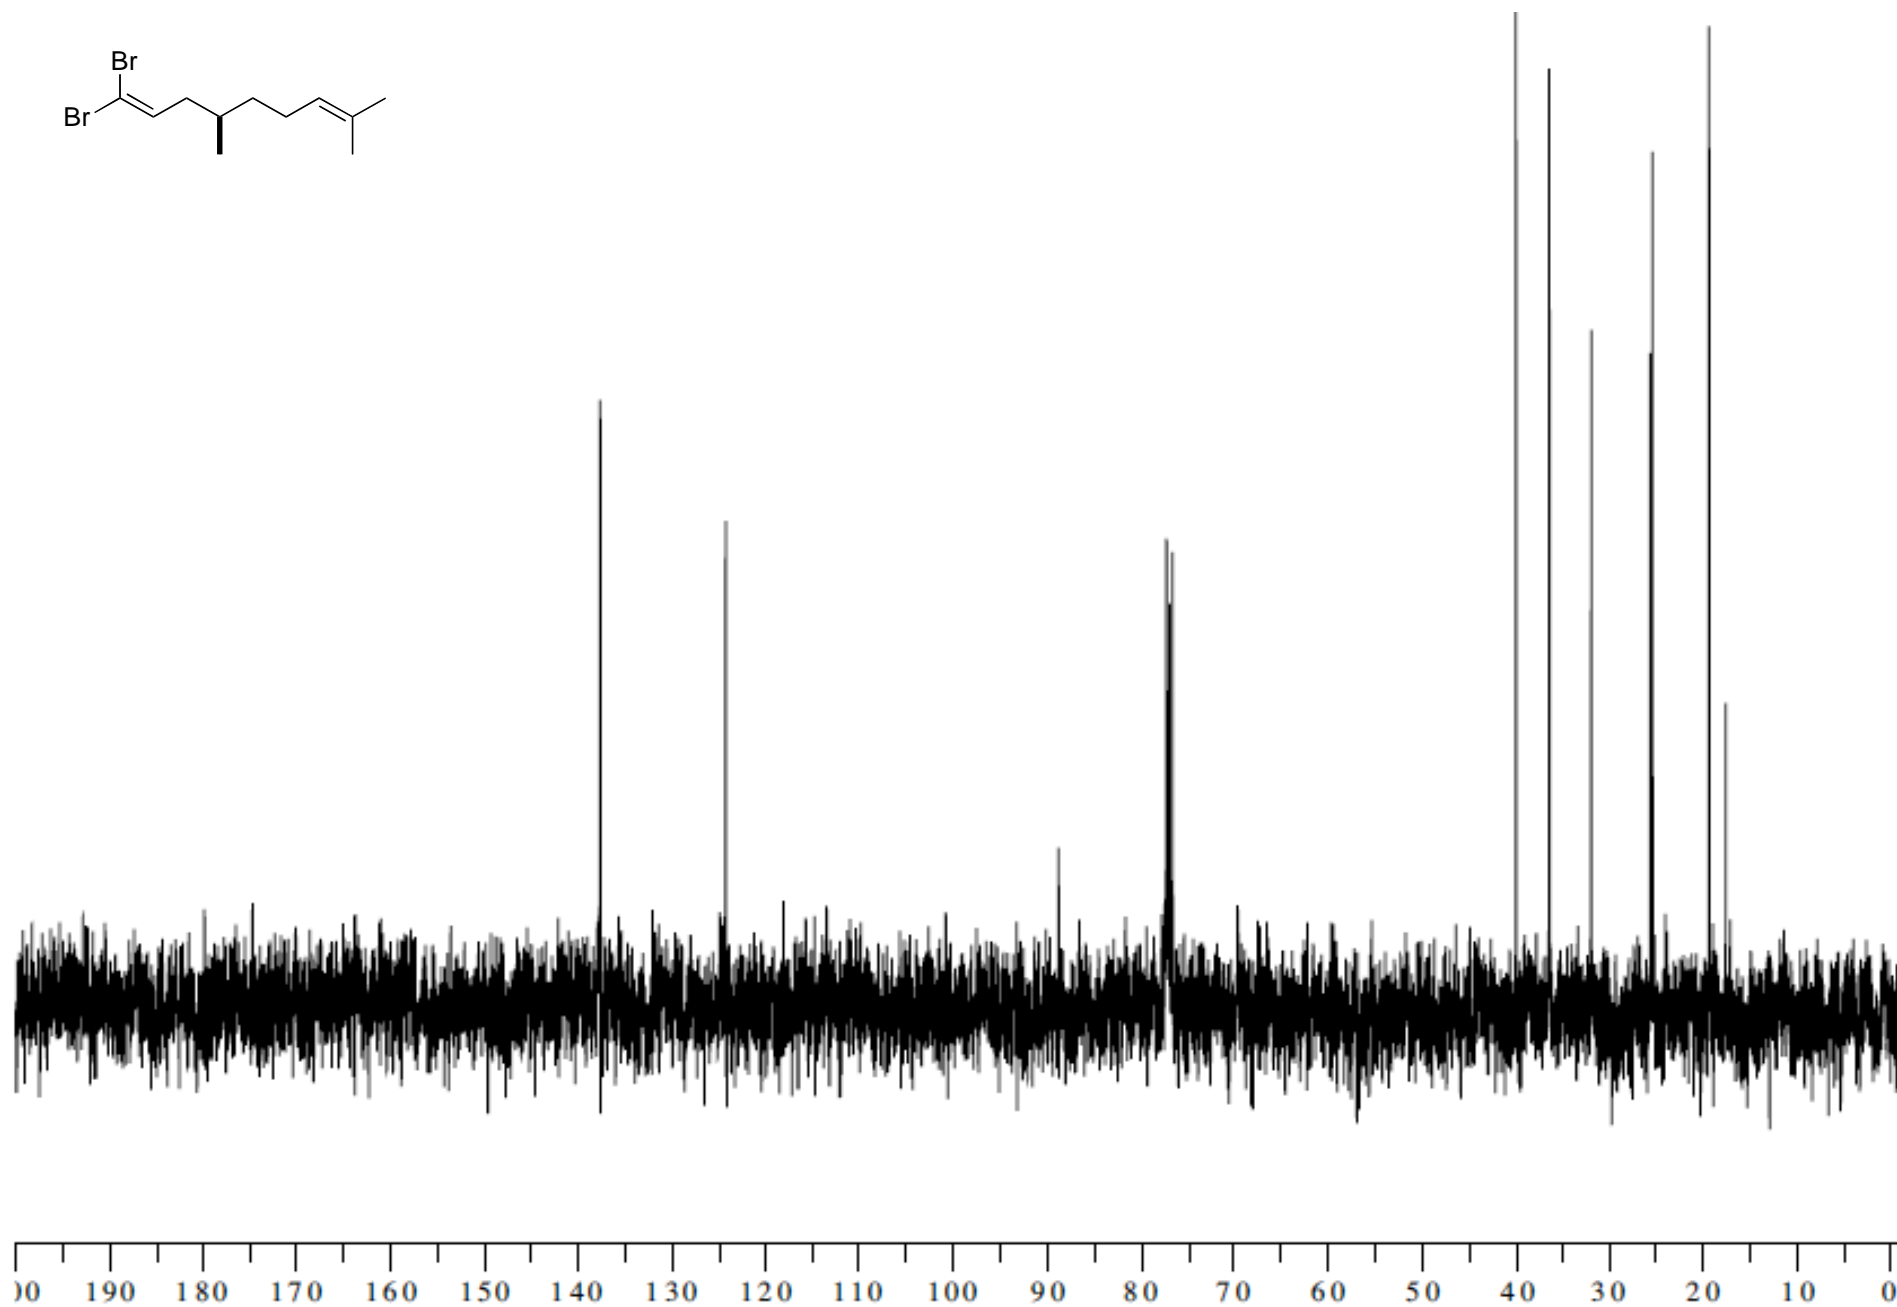

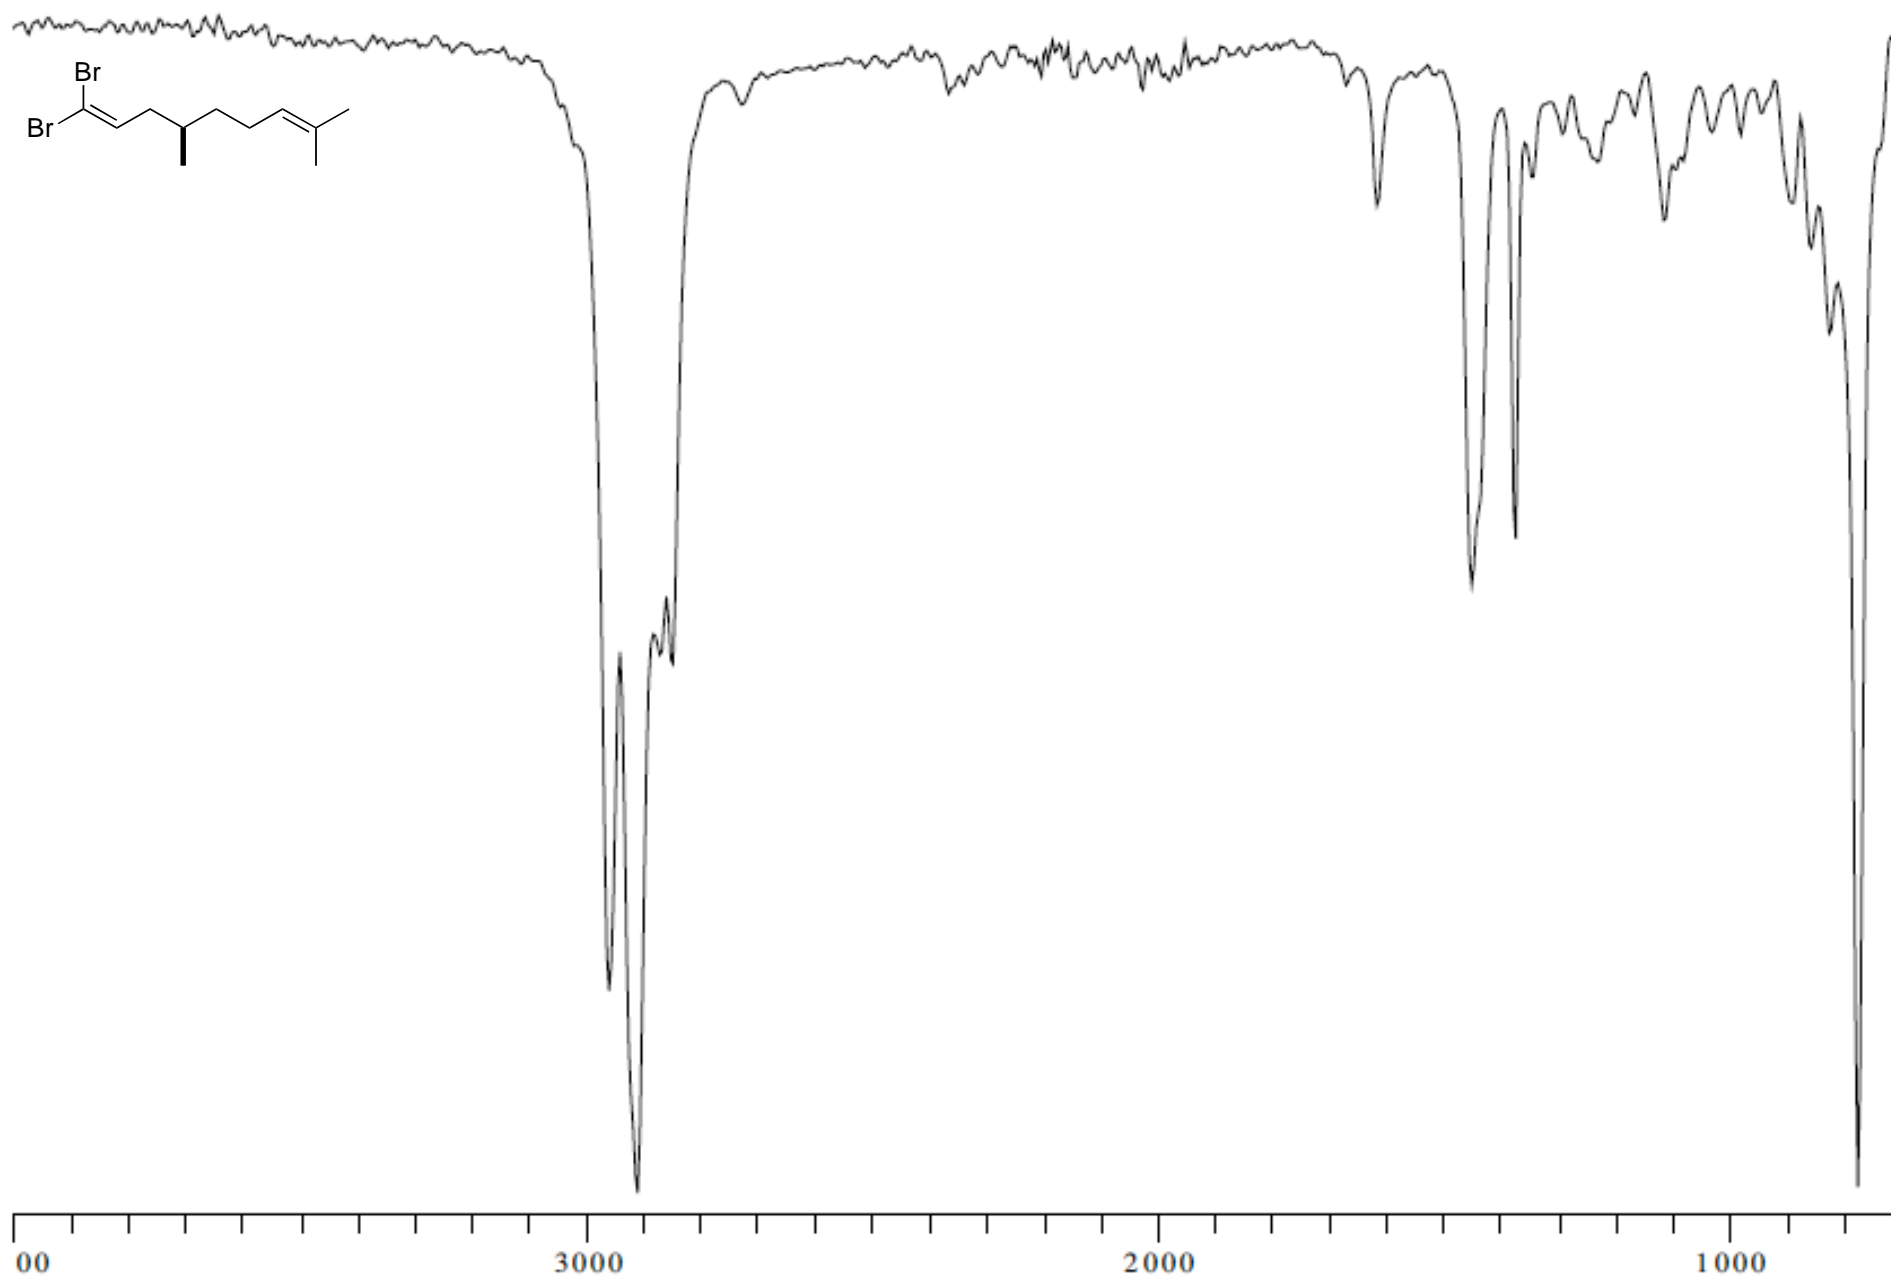

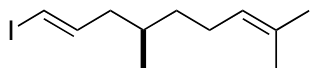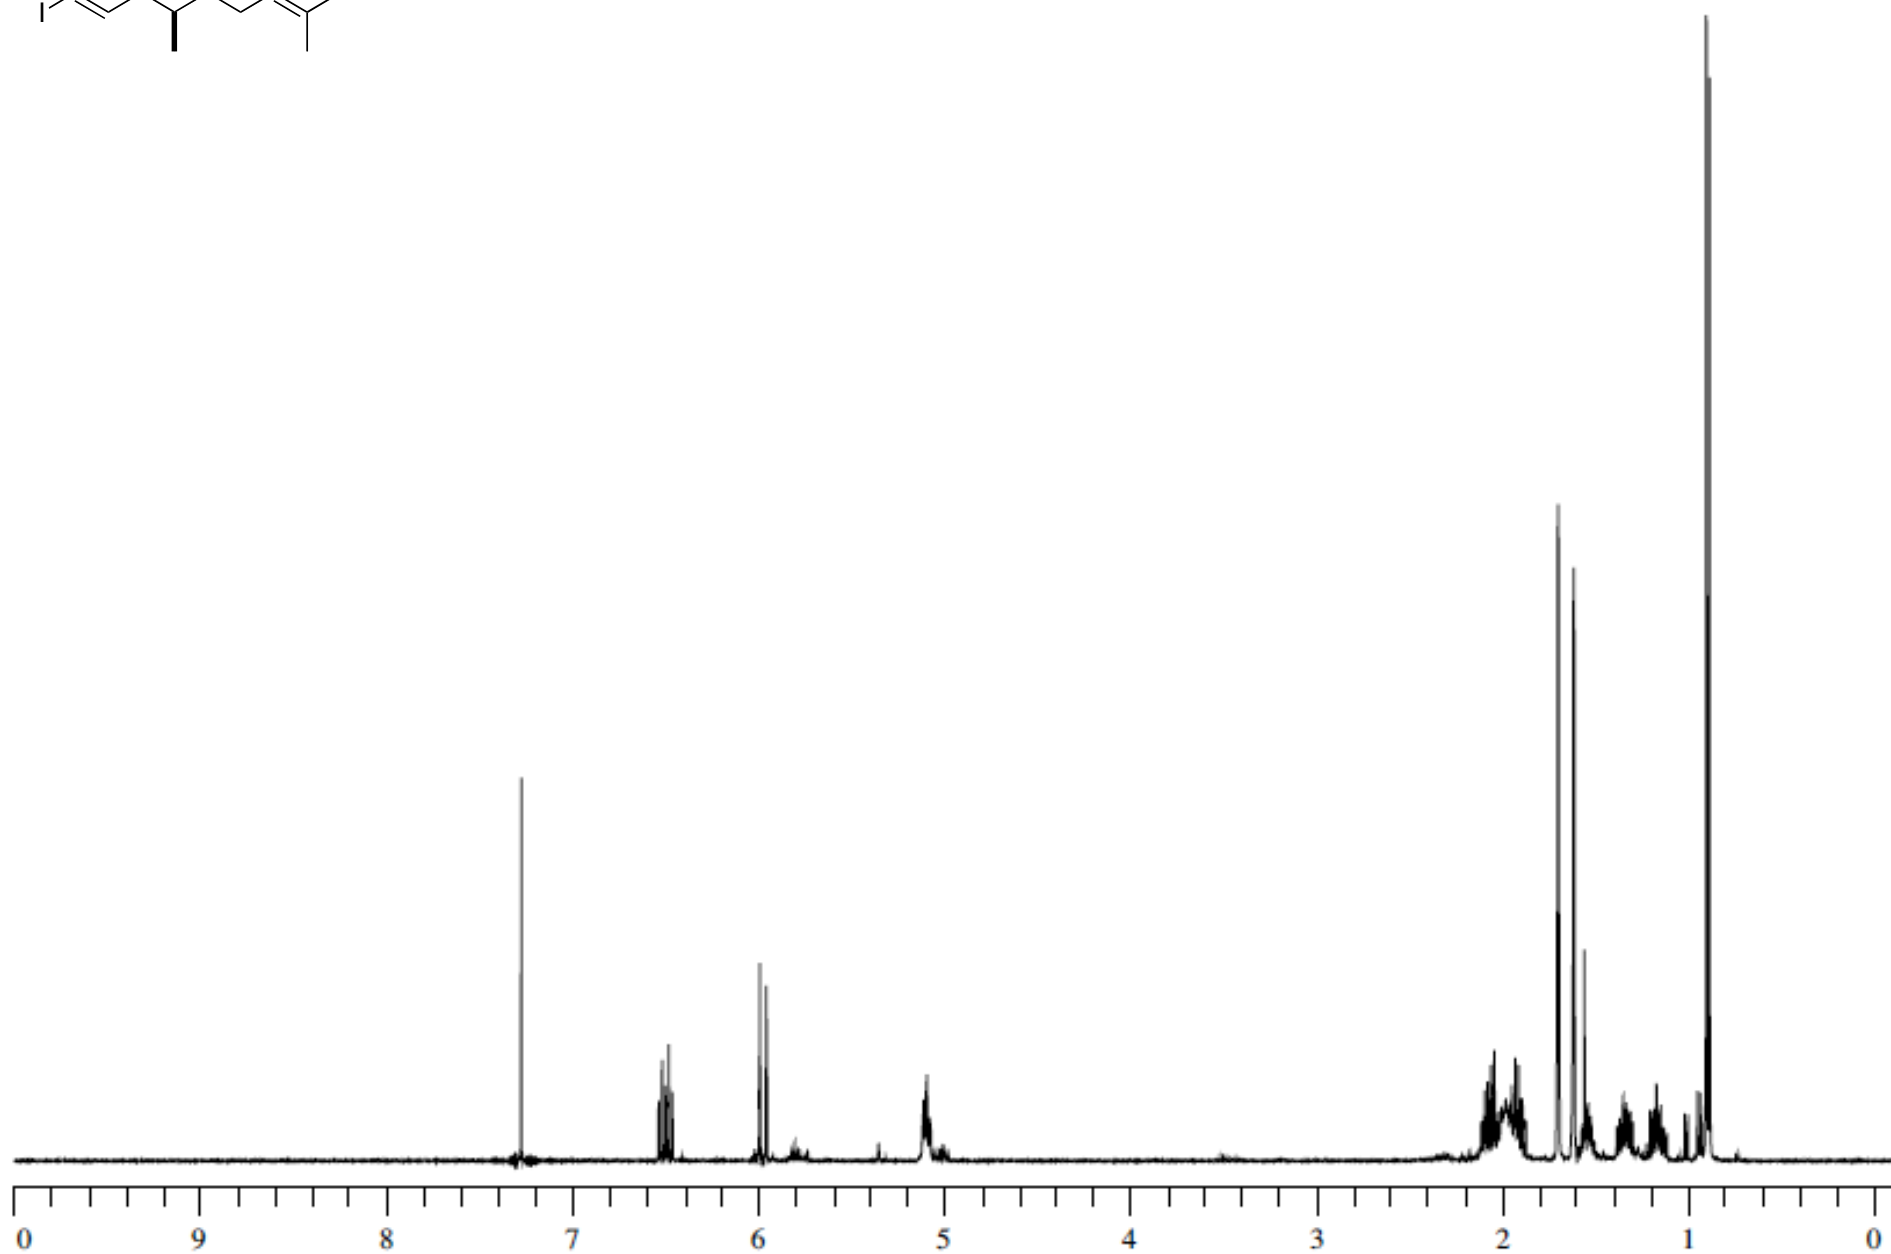



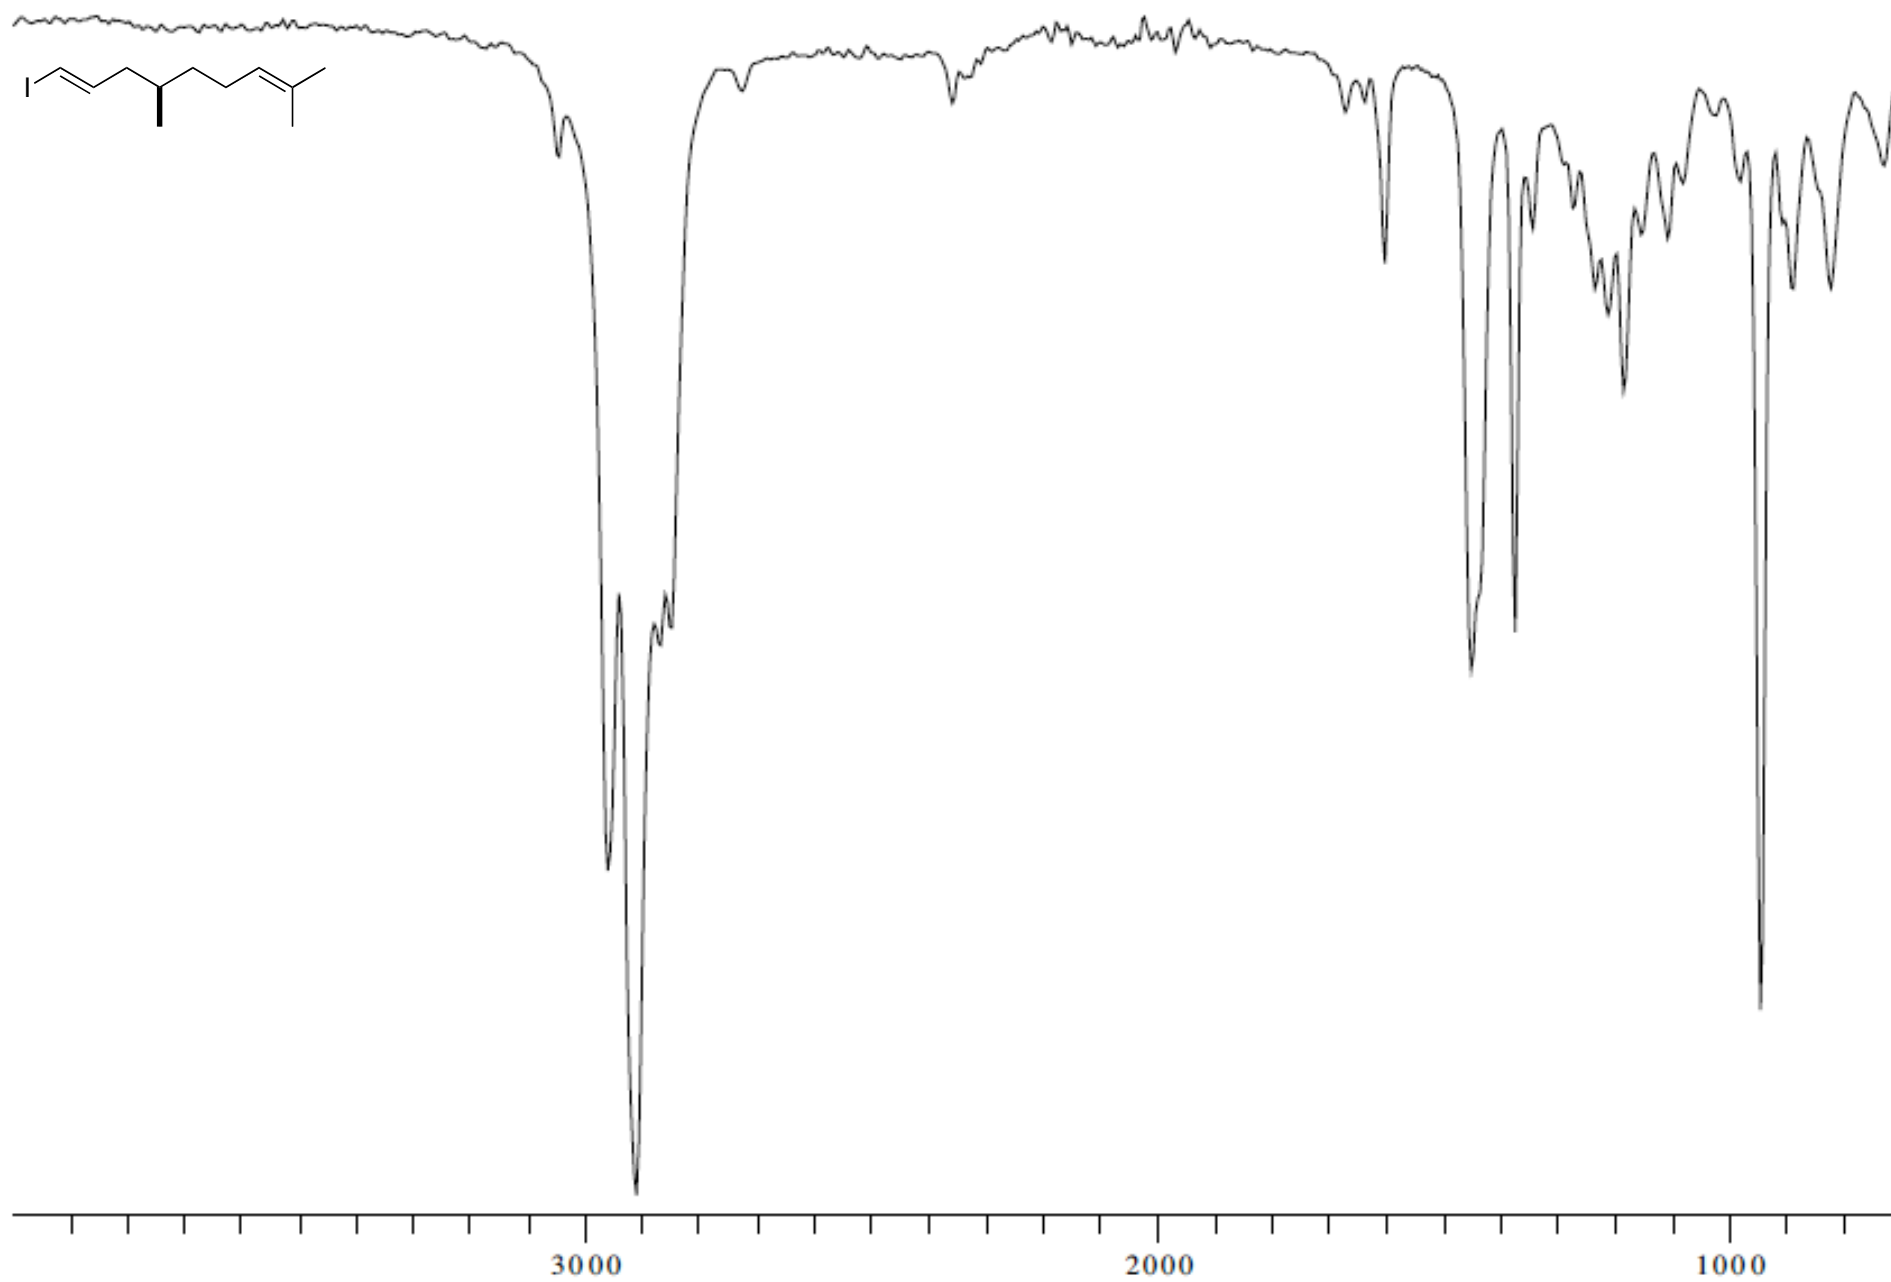

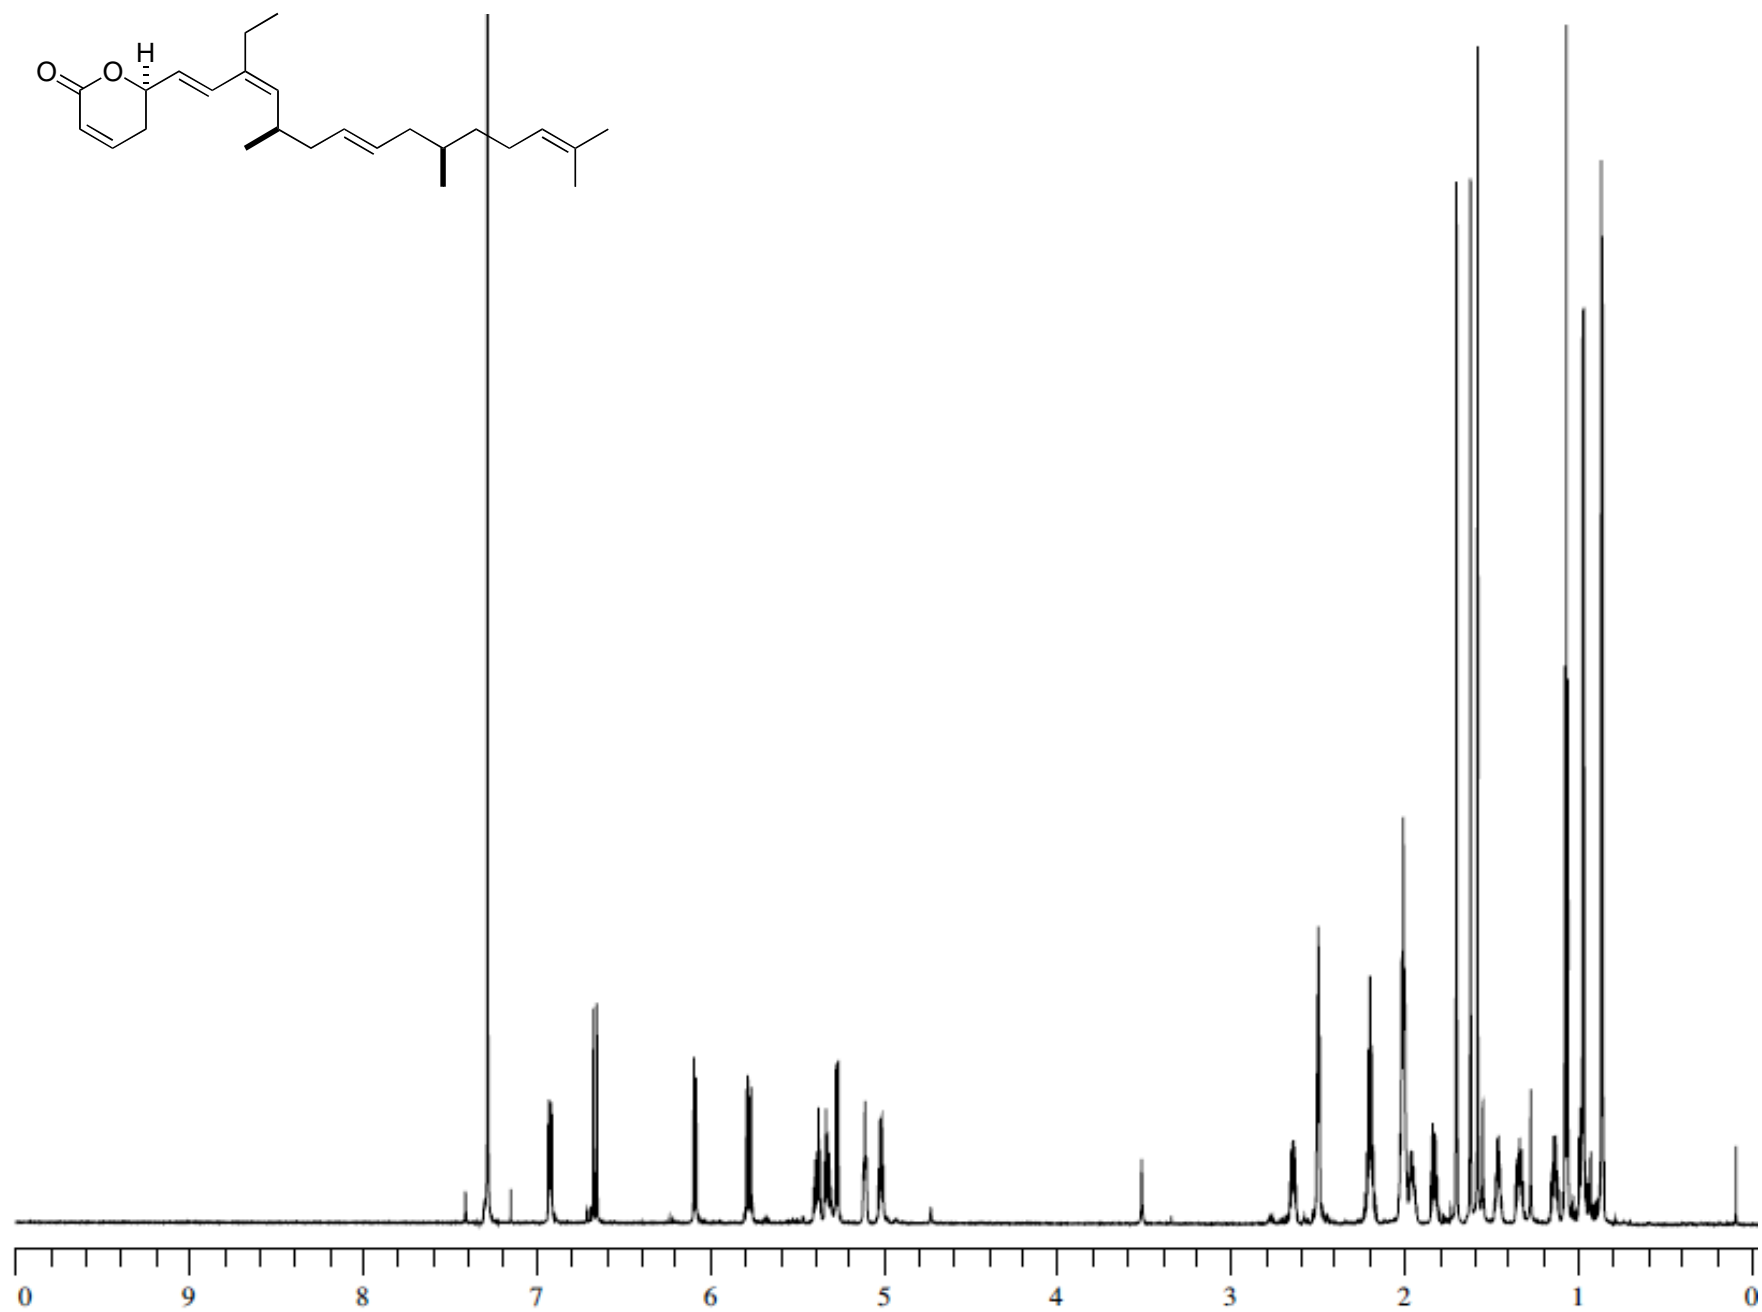



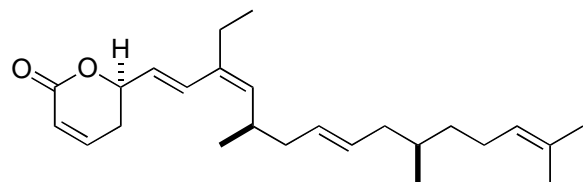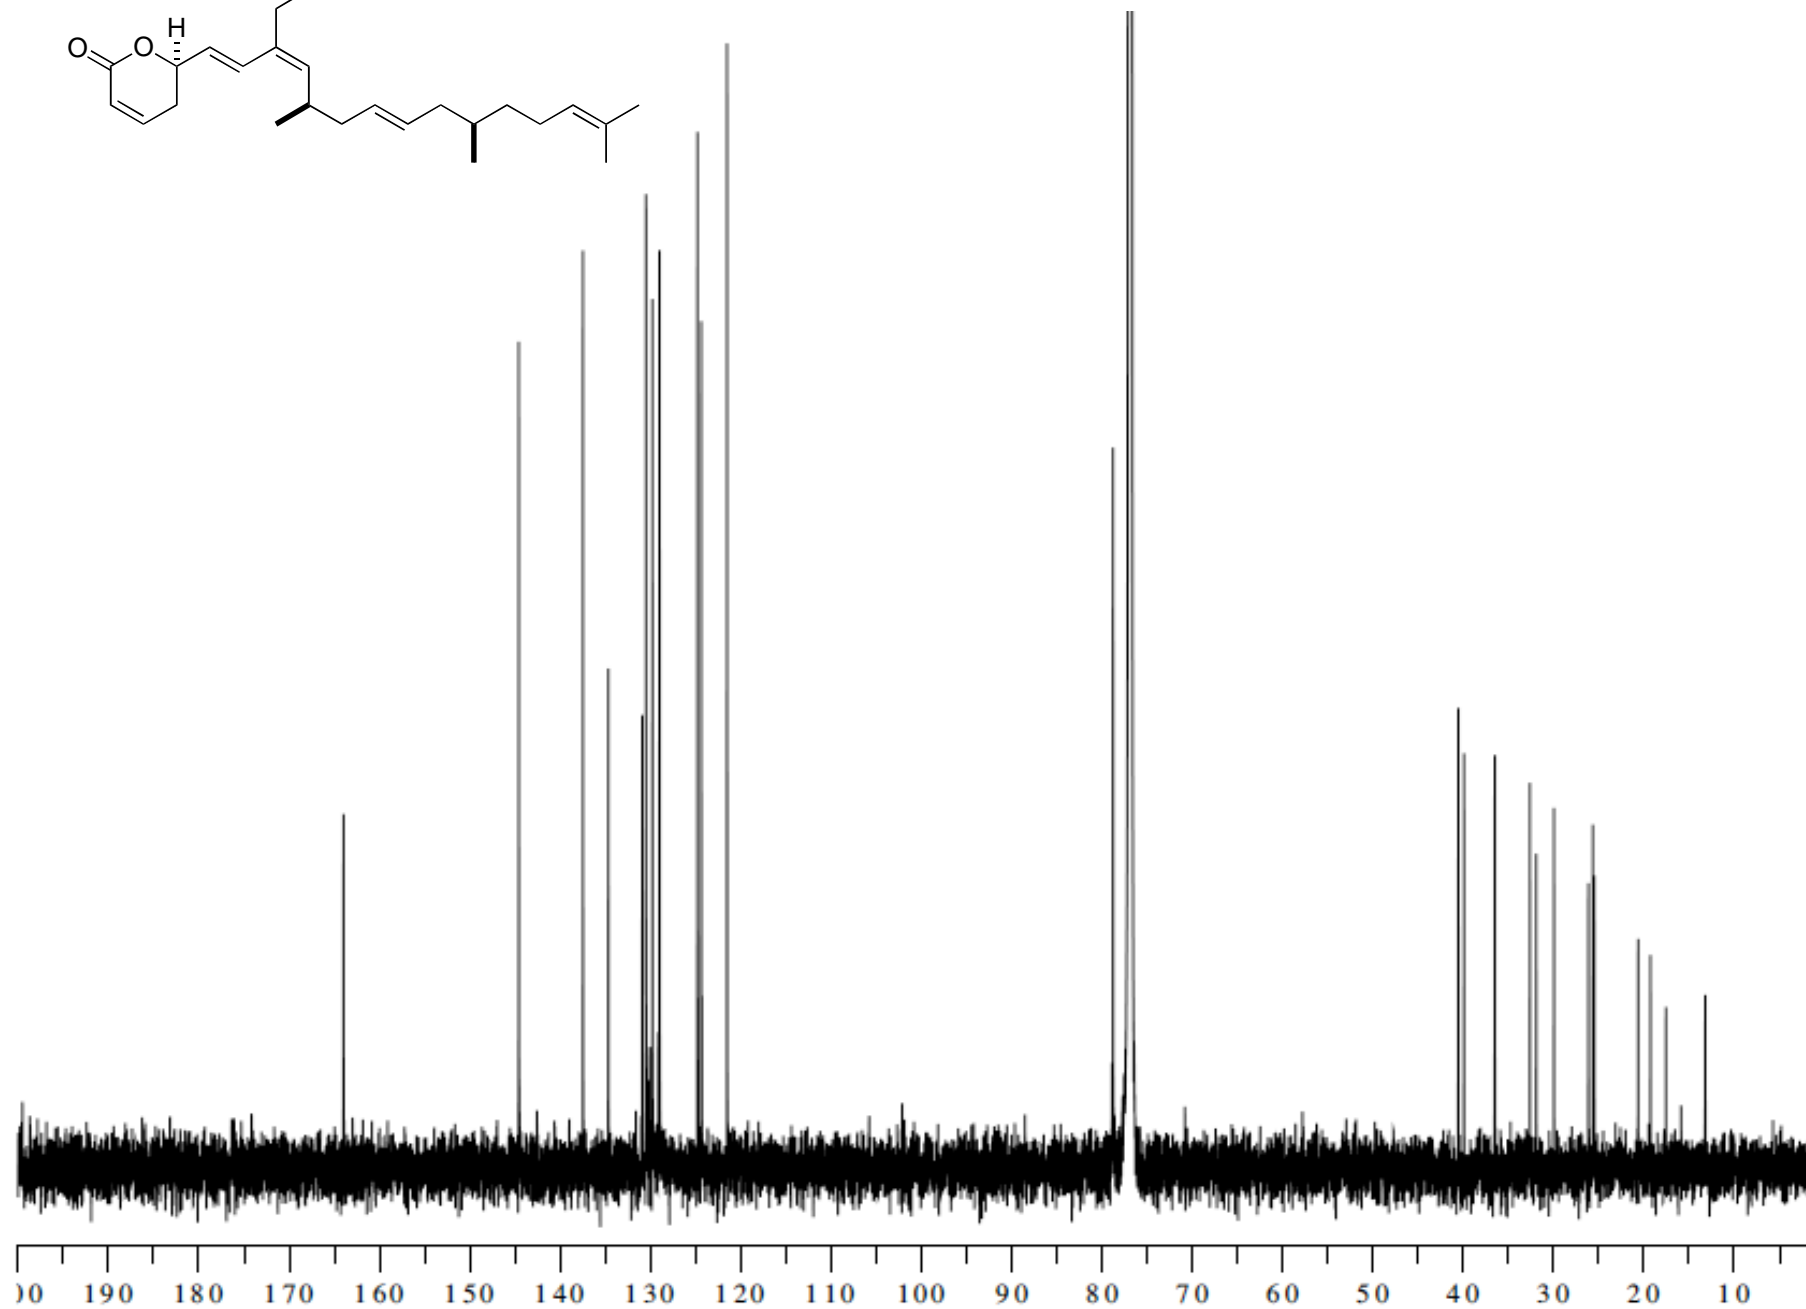

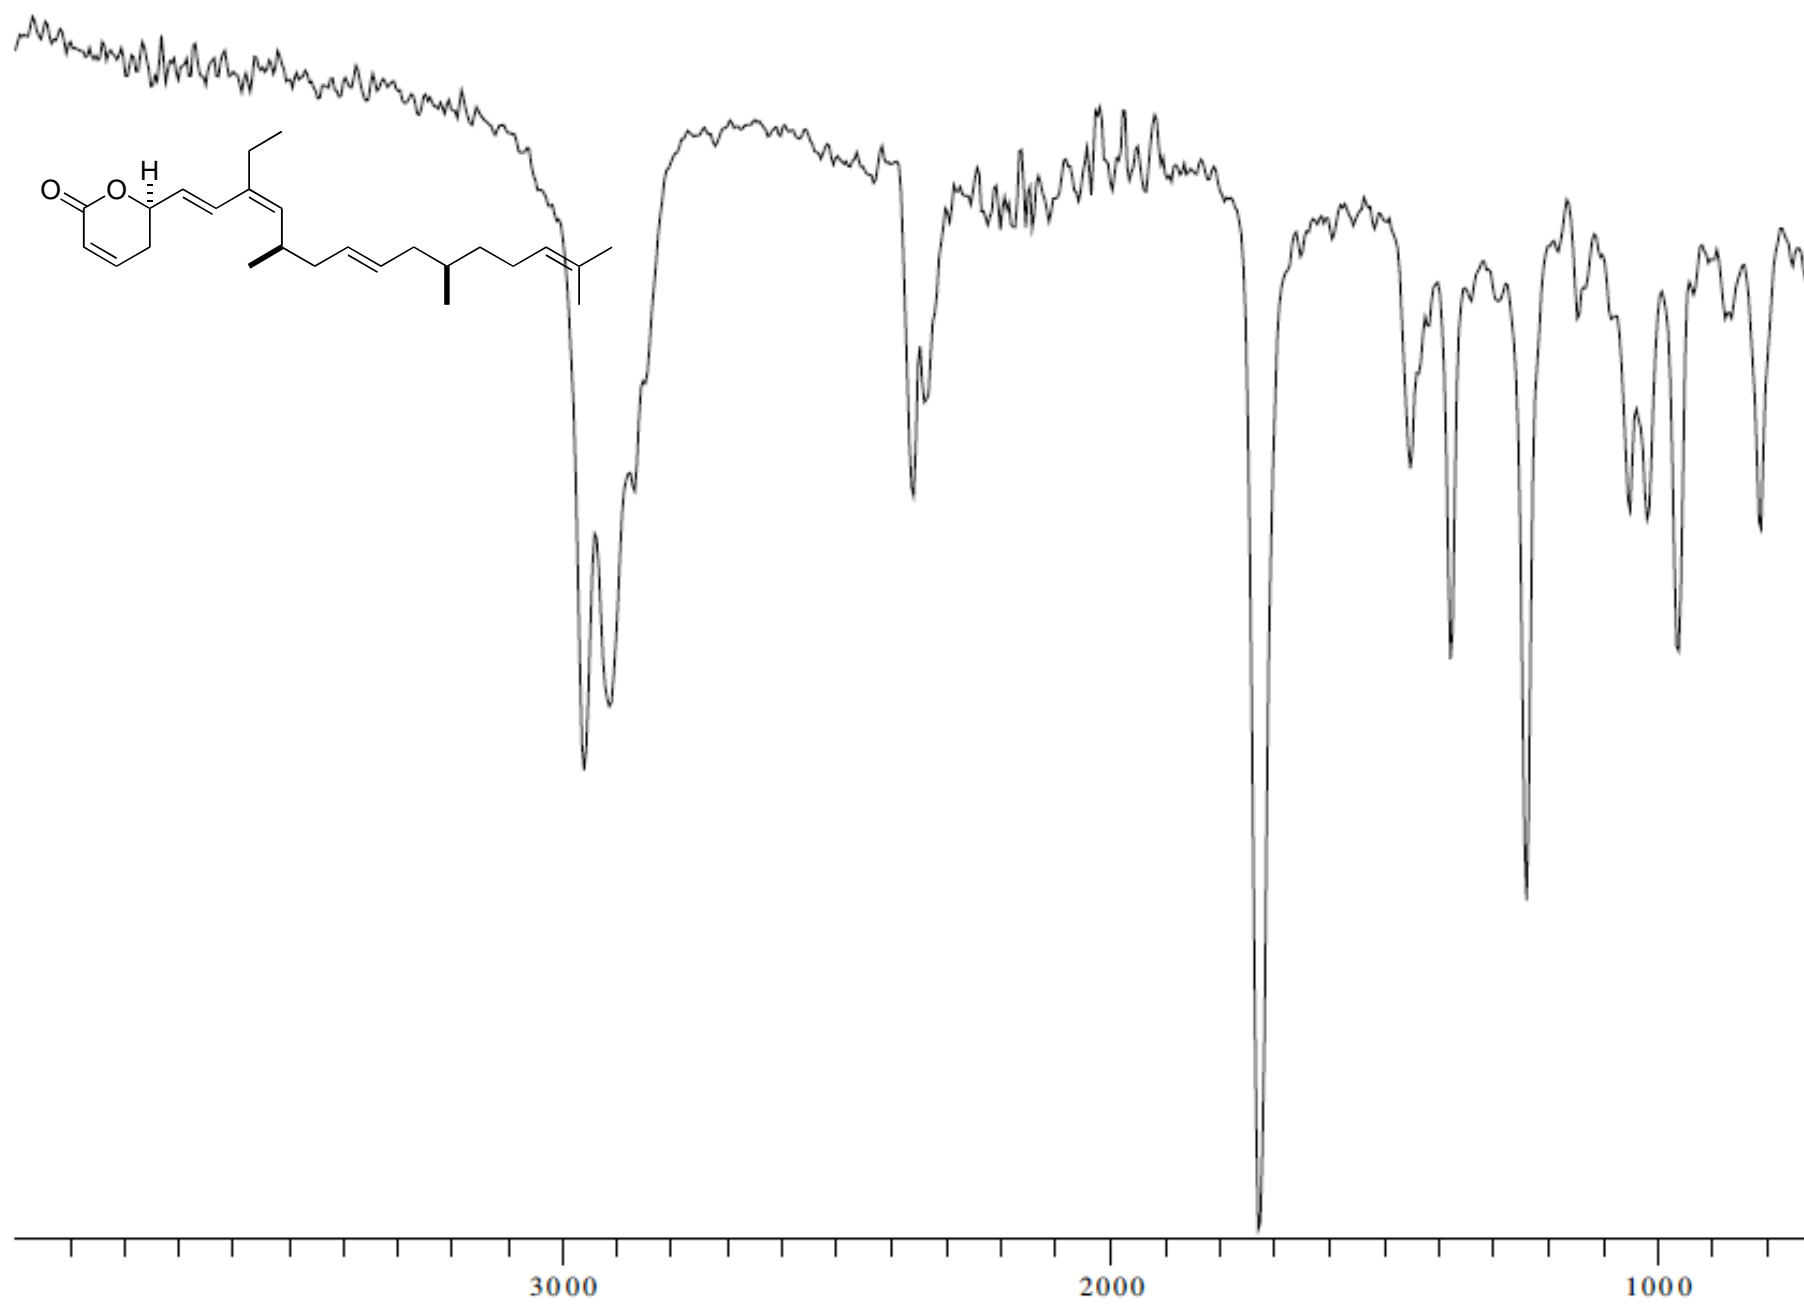

Supplement: Supplementary file 1 [file 4489858]
